# Supplementary material for: Antibiotics and specialized metabolites from the human microbiota
Source: Royal Society of Chemistry journal article supplement (doi:10.1039/c7np00021a), 2017-01-01
Supplement: c7np00021a1.xlsx [file c7np00021a1.xlsx]

## Sheet: supp_table1
Organism ID	Body Site	Organism Name	Cluster Family	Cluster Type	Cluster Number	Matched Compound	GARLIC Score	SMILES	Bacteriocin Sequence
AFPD01	GI	Mycobacterium avium subsp. paratuberculosis Pt144	[u'TYPE_I_POLYKETIDE']	[u'PKS']	13	[u'STRIATIN-B']	0.965686	O[C@](O[C@H]1OC)([C@@H]2OC(C)=O)[C@]([C@@H](OC2)O3)(O)[C@]([C@H]3[C@@]4(C)[C@]([H])5C6=C(C(C)C)CC[C@@](C)6CC4)([H])C1=C[C@@H]5O
AFPD01	GI	Mycobacterium avium subsp. paratuberculosis Pt144	[u'TYPE_I_POLYKETIDE']	[u'PKS']	21	[u'Sorbistin A1', u'P 2563-I', u'P-2563-B', u'P 2563 P', u'GL A1', u'LL-AM 31beta', u'AM 31beta', u'BN-186-A', u'SORBISTIN-A1', u'BU-2183-A', u'LL-AM-31-B"']	0.918033	O=C(CC)N[C@@H]1[C@@H](CO)O[C@H](OC(C(CN)O)C(N)C(CO)O)[C@H](O)[C@H]1O
LJHL01	RESPIRATORY	Mycobacterium chimaera	[u'TYPE_I_POLYKETIDE']	[u'PKS']	18	[u'a-Methyldethiobiotin', u'a-MDB', u'LIBRAMYCIN-A', u'A".5-DIMETHYL-2-OXO-4-IMIDAZOLIDINEHEXANOIC ACID']	0.875776	O=C(N[C@]([H])1CCCCC(C)C(O)=O)N[C@]1([H])C
AUWP01	RESPIRATORY	Mycobacterium sp. UM_RHS	[u'TYPE_I_POLYKETIDE']	[u'PKS']	14	[u'STRIATIN-B']	0.965686	O[C@](O[C@H]1OC)([C@@H]2OC(C)=O)[C@]([C@@H](OC2)O3)(O)[C@]([C@H]3[C@@]4(C)[C@]([H])5C6=C(C(C)C)CC[C@@](C)6CC4)([H])C1=C[C@@H]5O
AWNJ01	RESPIRATORY	Mycobacterium avium subsp. hominissuis 3388	[u'TYPE_I_POLYKETIDE']	[u'PKS']	14	[u'a-Methyldethiobiotin', u'a-MDB', u'LIBRAMYCIN-A', u'A".5-DIMETHYL-2-OXO-4-IMIDAZOLIDINEHEXANOIC ACID']	0.875776	O=C(N[C@]([H])1CCCCC(C)C(O)=O)N[C@]1([H])C
LAUB02	RESPIRATORY	Burkholderia pseudomallei	[u'TYPE_I_POLYKETIDE']	[u'PKS']	16	[u'Reductomycin', u'SS-551-II', u'S-551-II', u'AM-6201', u'REDUCTIOMYCIN', u'S551-II', u'REDUCTOMYCIN', u'SS-551-II']	0.86755	O=C1C(NC(/C=C/C2=COC(OC(C)=O)C2)=O)=C(O)CC1
LKTM01	RESPIRATORY	Mycobacterium gordonae	[u'TYPE_I_POLYKETIDE']	[u'PKS']	8	[u'a-Methyldethiobiotin', u'a-MDB', u'LIBRAMYCIN-A', u'A".5-DIMETHYL-2-OXO-4-IMIDAZOLIDINEHEXANOIC ACID']	0.875776	O=C(N[C@]([H])1CCCCC(C)C(O)=O)N[C@]1([H])C
JKNY01	RESPIRATORY	Mycobacterium tuberculosis M1389	[u'TYPE_I_POLYKETIDE']	[u'PKS']	14	[u'STRIATIN-B']	0.965686	O[C@](O[C@H]1OC)([C@@H]2OC(C)=O)[C@]([C@@H](OC2)O3)(O)[C@]([C@H]3[C@@]4(C)[C@]([H])5C6=C(C(C)C)CC[C@@](C)6CC4)([H])C1=C[C@@H]5O
AGVS01	RESPIRATORY	Burkholderia pseudomallei 354a	[u'TYPE_I_POLYKETIDE']	[u'PKS']	10	[u'RUBOMYCIN-F']	0.965686	O=C1C(C(O)=C(C[C@](C(C)=O)(O)C2)C([C@H]2O[C@H](O[C@@H](C)[C@H]3O)C[C@@H]3NC(OCC)=O)=C4O)=C4C(C5=C1C=CC=C5OC)=O
AJLZ01	RESPIRATORY	Mycobacterium abscessus M115	[u'TYPE_I_POLYKETIDE']	[u'PKS']	5	[u'TAN-1518-X', u'SF-2575']	0.790323	O=C1C(C(N)=O)=C(O)[C@H](OC(C2=CC=CC=C2O)=O)[C@@]3([H])C1(OC)C(O)=C4C(C(C(O)=C5[C@]6([H])O[C@@H]([C@@H](OC(/C(C)=C\C)=O)[C@H](O)C6)C)=C(C=C5)[C@@](OC)(C)[C@]([H])4C3)=O
LRRM01	CSF	Nocardia brasiliensis	[u'TYPE_I_POLYKETIDE']	[u'PKS']	6	[u"(2R*,3S*)-2-(4',5'-Epoxyhex-2'E-en)oyl-2-hydroxy- 3- hydroxymethylbutanolide", u'BUTALACTIN', u"2-{4'.5'-EPOXYHEX-2'-[E]-ENOYL}-2-HYDROXY-3-HYDROXYMETHYL-2.3-[Z]-BUTENOLIDE"]	0.753086	O=C1[C@@](C(/C=C/C2OC2C)=O)(O)[C@@H](CO)CO1
LRRM01	CSF	Nocardia brasiliensis	[u'TYPE_I_POLYKETIDE']	[u'PKS']	9	[u'Ganomycin B']	0.752066	O=C(O)/C(CC/C=C(C)/CCC=C(C)C)=C\CC1=C(O)C=CC(O)=C1
LRRM01	CSF	Nocardia brasiliensis	[u'TYPE_I_POLYKETIDE']	[u'ENEDIYNE_9_MEMBERED']	23	[u'STRIATIN-B']	0.927885	O[C@](O[C@H]1OC)([C@@H]2OC(C)=O)[C@]([C@@H](OC2)O3)(O)[C@]([C@H]3[C@@]4(C)[C@]([H])5C6=C(C(C)C)CC[C@@](C)6CC4)([H])C1=C[C@@H]5O
AKUC01	RESPIRATORY	Mycobacterium abscessus 5S-1212	[u'TYPE_I_POLYKETIDE']	[u'PKS']	14	[u'STRIATIN-B']	0.965686	O[C@](O[C@H]1OC)([C@@H]2OC(C)=O)[C@]([C@@H](OC2)O3)(O)[C@]([C@H]3[C@@]4(C)[C@]([H])5C6=C(C(C)C)CC[C@@](C)6CC4)([H])C1=C[C@@H]5O
JAON01	RESPIRATORY	Mycobacterium intracellulare MIN_052511_1280	[u'TYPE_I_POLYKETIDE']	[u'PKS']	18	[u'a-Methyldethiobiotin', u'a-MDB', u'LIBRAMYCIN-A', u'A".5-DIMETHYL-2-OXO-4-IMIDAZOLIDINEHEXANOIC ACID']	0.875776	O=C(N[C@]([H])1CCCCC(C)C(O)=O)N[C@]1([H])C
AJVH01	ORAL	Corynebacterium diphtheriae bv. intermedius str. NCTC 5011	[u'TYPE_I_POLYKETIDE']	[u'PKS']	2	[u'STRIATIN-B']	0.965686	O[C@](O[C@H]1OC)([C@@H]2OC(C)=O)[C@]([C@@H](OC2)O3)(O)[C@]([C@H]3[C@@]4(C)[C@]([H])5C6=C(C(C)C)CC[C@@](C)6CC4)([H])C1=C[C@@H]5O
AHJD01	RESPIRATORY	Burkholderia pseudomallei 354e	[u'TYPE_I_POLYKETIDE']	[u'PKS']	20	[u'RUBOMYCIN-F']	0.965686	O=C1C(C(O)=C(C[C@](C(C)=O)(O)C2)C([C@H]2O[C@H](O[C@@H](C)[C@H]3O)C[C@@H]3NC(OCC)=O)=C4O)=C4C(C5=C1C=CC=C5OC)=O
AKUA01	RESPIRATORY	Mycobacterium abscessus 5S-0708	[u'TYPE_I_POLYKETIDE']	[u'PKS']	14	[u'STRIATIN-B']	0.965686	O[C@](O[C@H]1OC)([C@@H]2OC(C)=O)[C@]([C@@H](OC2)O3)(O)[C@]([C@H]3[C@@]4(C)[C@]([H])5C6=C(C(C)C)CC[C@@](C)6CC4)([H])C1=C[C@@H]5O
MIOD01	ORAL	Corynebacterium diphtheriae	[u'TYPE_I_POLYKETIDE']	[u'PKS']	4	[u'STRIATIN-B']	0.965686	O[C@](O[C@H]1OC)([C@@H]2OC(C)=O)[C@]([C@@H](OC2)O3)(O)[C@]([C@H]3[C@@]4(C)[C@]([H])5C6=C(C(C)C)CC[C@@](C)6CC4)([H])C1=C[C@@H]5O
AFPG01	GI	Mycobacterium avium subsp. paratuberculosis Pt154	[u'TYPE_I_POLYKETIDE']	[u'PKS']	13	[u'Sorbistin A1', u'P 2563-I', u'P-2563-B', u'P 2563 P', u'GL A1', u'LL-AM 31beta', u'AM 31beta', u'BN-186-A', u'SORBISTIN-A1', u'BU-2183-A', u'LL-AM-31-B"']	0.918033	O=C(CC)N[C@@H]1[C@@H](CO)O[C@H](OC(C(CN)O)C(N)C(CO)O)[C@H](O)[C@H]1O
AFPG01	GI	Mycobacterium avium subsp. paratuberculosis Pt154	[u'TYPE_I_POLYKETIDE']	[u'PKS']	20	[u'STRIATIN-B']	0.965686	O[C@](O[C@H]1OC)([C@@H]2OC(C)=O)[C@]([C@@H](OC2)O3)(O)[C@]([C@H]3[C@@]4(C)[C@]([H])5C6=C(C(C)C)CC[C@@](C)6CC4)([H])C1=C[C@@H]5O
LQYE01	GI	Mycobacterium immunogenum	[u'TYPE_I_POLYKETIDE']	[u'PKS']	15	[u'STRIATIN-B']	0.965686	O[C@](O[C@H]1OC)([C@@H]2OC(C)=O)[C@]([C@@H](OC2)O3)(O)[C@]([C@H]3[C@@]4(C)[C@]([H])5C6=C(C(C)C)CC[C@@](C)6CC4)([H])C1=C[C@@H]5O
LAYX01	SKIN	Streptomyces sp. KE1	[u'TYPE_I_POLYKETIDE']	[u'PKS']	5	[u'Farcinicine', u'Acetopyrrothin', u'THIOLUTIN', u'ACETOPYRROTHIN', u'6-ACETAMINO-4.5-DIHYDRO-4-METHYL-1.2-DITHIOLO[4.3-B]PYRROLE', u'ACETYLPYRROTHINE', u'FARCINICIN']	0.705357	O=C(N1C)C(NC(C)=O)=C2C1=CSS2
LAYX01	SKIN	Streptomyces sp. KE1	[u'TYPE_I_POLYKETIDE']	[u'PKS']	11	[u'STRIATIN-B']	0.965686	O[C@](O[C@H]1OC)([C@@H]2OC(C)=O)[C@]([C@@H](OC2)O3)(O)[C@]([C@H]3[C@@]4(C)[C@]([H])5C6=C(C(C)C)CC[C@@](C)6CC4)([H])C1=C[C@@H]5O
LDPP01	RESPIRATORY	Mycobacterium nebraskense	[u'TYPE_I_POLYKETIDE']	[u'PKS']	19	[u'a-Methyldethiobiotin', u'a-MDB', u'LIBRAMYCIN-A', u'A".5-DIMETHYL-2-OXO-4-IMIDAZOLIDINEHEXANOIC ACID']	0.875776	O=C(N[C@]([H])1CCCCC(C)C(O)=O)N[C@]1([H])C
LTJU01	URINE	Corynebacterium sp. HMSC055A01	[u'TYPE_I_POLYKETIDE']	[u'PKS']	2	[u'STRIATIN-B']	0.965686	O[C@](O[C@H]1OC)([C@@H]2OC(C)=O)[C@]([C@@H](OC2)O3)(O)[C@]([C@H]3[C@@]4(C)[C@]([H])5C6=C(C(C)C)CC[C@@](C)6CC4)([H])C1=C[C@@H]5O
AKUD01	RESPIRATORY	Mycobacterium abscessus 5S-1215	[u'TYPE_I_POLYKETIDE']	[u'PKS']	13	[u'STRIATIN-B']	0.965686	O[C@](O[C@H]1OC)([C@@H]2OC(C)=O)[C@]([C@@H](OC2)O3)(O)[C@]([C@H]3[C@@]4(C)[C@]([H])5C6=C(C(C)C)CC[C@@](C)6CC4)([H])C1=C[C@@H]5O
AHRL01	ORAL	Streptococcus mutans 4SM1	[u'TYPE_I_POLYKETIDE']	[u'PKS']	3	[u'8A"-ACETOXYMULTIPLOLIDE-A']	0.721116	C[C@@H]1C[C@@H](OC(C)=O)[C@@H](O)\C=C\[C@@H]2O[C@@H]2C(=O)O1
AYTF01	RESPIRATORY	Mycobacterium abscessus MAB_091912_2446	[u'TYPE_I_POLYKETIDE']	[u'PKS']	10	[u'Sorbistin A1', u'P 2563-I', u'P-2563-B', u'P 2563 P', u'GL A1', u'LL-AM 31beta', u'AM 31beta', u'BN-186-A', u'SORBISTIN-A1', u'BU-2183-A', u'LL-AM-31-B"']	0.918033	O=C(CC)N[C@@H]1[C@@H](CO)O[C@H](OC(C(CN)O)C(N)C(CO)O)[C@H](O)[C@H]1O
AKUB01	RESPIRATORY	Mycobacterium abscessus 5S-0817	[u'TYPE_I_POLYKETIDE']	[u'PKS']	15	[u'STRIATIN-B']	0.965686	O[C@](O[C@H]1OC)([C@@H]2OC(C)=O)[C@]([C@@H](OC2)O3)(O)[C@]([C@H]3[C@@]4(C)[C@]([H])5C6=C(C(C)C)CC[C@@](C)6CC4)([H])C1=C[C@@H]5O
LASX01	RESPIRATORY	Mycobacterium nebraskense	[u'TYPE_I_POLYKETIDE']	[u'PKS']	23	[u'TAN-1518-X', u'SF-2575']	1	O=C1C(C(N)=O)=C(O)[C@H](OC(C2=CC=CC=C2O)=O)[C@@]3([H])C1(OC)C(O)=C4C(C(C(O)=C5[C@]6([H])O[C@@H]([C@@H](OC(/C(C)=C\C)=O)[C@H](O)C6)C)=C(C=C5)[C@@](OC)(C)[C@]([H])4C3)=O
LASX01	RESPIRATORY	Mycobacterium nebraskense	[u'TYPE_I_POLYKETIDE']	[u'PKS']	24	[u'STRIATIN-B']	0.965686	O[C@](O[C@H]1OC)([C@@H]2OC(C)=O)[C@]([C@@H](OC2)O3)(O)[C@]([C@H]3[C@@]4(C)[C@]([H])5C6=C(C(C)C)CC[C@@](C)6CC4)([H])C1=C[C@@H]5O
LASX01	RESPIRATORY	Mycobacterium nebraskense	[u'TYPE_I_POLYKETIDE']	[u'PKS']	25	[u'TAN-1518-X', u'SF-2575']	1	O=C1C(C(N)=O)=C(O)[C@H](OC(C2=CC=CC=C2O)=O)[C@@]3([H])C1(OC)C(O)=C4C(C(C(O)=C5[C@]6([H])O[C@@H]([C@@H](OC(/C(C)=C\C)=O)[C@H](O)C6)C)=C(C=C5)[C@@](OC)(C)[C@]([H])4C3)=O
JZUJ01	ORAL	Corynebacterium diphtheriae	[u'TYPE_I_POLYKETIDE']	[u'PKS']	2	[u'STRIATIN-B']	0.965686	O[C@](O[C@H]1OC)([C@@H]2OC(C)=O)[C@]([C@@H](OC2)O3)(O)[C@]([C@H]3[C@@]4(C)[C@]([H])5C6=C(C(C)C)CC[C@@](C)6CC4)([H])C1=C[C@@H]5O
AFPI01	GI	Mycobacterium avium subsp. paratuberculosis Pt164	[u'TYPE_I_POLYKETIDE']	[u'PKS']	11	[u'Sorbistin A1', u'P 2563-I', u'P-2563-B', u'P 2563 P', u'GL A1', u'LL-AM 31beta', u'AM 31beta', u'BN-186-A', u'SORBISTIN-A1', u'BU-2183-A', u'LL-AM-31-B"']	0.918033	O=C(CC)N[C@@H]1[C@@H](CO)O[C@H](OC(C(CN)O)C(N)C(CO)O)[C@H](O)[C@H]1O
AFPI01	GI	Mycobacterium avium subsp. paratuberculosis Pt164	[u'TYPE_I_POLYKETIDE']	[u'PKS']	20	[u'STRIATIN-B']	0.965686	O[C@](O[C@H]1OC)([C@@H]2OC(C)=O)[C@]([C@@H](OC2)O3)(O)[C@]([C@H]3[C@@]4(C)[C@]([H])5C6=C(C(C)C)CC[C@@](C)6CC4)([H])C1=C[C@@H]5O
JAOP01	RESPIRATORY	Mycobacterium avium MAV_120709_2344	[u'TYPE_I_POLYKETIDE']	[u'PKS']	20	[u'a-Methyldethiobiotin', u'a-MDB', u'LIBRAMYCIN-A', u'A".5-DIMETHYL-2-OXO-4-IMIDAZOLIDINEHEXANOIC ACID']	0.875776	O=C(N[C@]([H])1CCCCC(C)C(O)=O)N[C@]1([H])C
MDYV01	ORAL	Corynebacterium diphtheriae	[u'TYPE_I_POLYKETIDE']	[u'PKS']	2	[u'STRIATIN-B']	0.965686	O[C@](O[C@H]1OC)([C@@H]2OC(C)=O)[C@]([C@@H](OC2)O3)(O)[C@]([C@H]3[C@@]4(C)[C@]([H])5C6=C(C(C)C)CC[C@@](C)6CC4)([H])C1=C[C@@H]5O
LWGR01	RESPIRATORY	Nocardia terpenica	[u'TYPE_I_POLYKETIDE']	[u'PKS']	6	[u'1,2 DIHYDROHELVOLIC ACID']	1	CC1C2C(OC(C)=O)C(=O)C3(C)C(CCC4\C(C(CC34C)OC(C)=O)=C(\CCC=C(C)C)C(O)=O)C2(C)CCC1=O
LWGR01	RESPIRATORY	Nocardia terpenica	[u'TYPE_I_POLYKETIDE']	[u'ENEDIYNE_9_MEMBERED']	15	[u'STRIATIN-B']	0.965686	O[C@](O[C@H]1OC)([C@@H]2OC(C)=O)[C@]([C@@H](OC2)O3)(O)[C@]([C@H]3[C@@]4(C)[C@]([H])5C6=C(C(C)C)CC[C@@](C)6CC4)([H])C1=C[C@@H]5O
LWGR01	RESPIRATORY	Nocardia terpenica	[u'TYPE_I_POLYKETIDE']	[u'PKS']	21	[u'STRIATIN-B']	0.965686	O[C@](O[C@H]1OC)([C@@H]2OC(C)=O)[C@]([C@@H](OC2)O3)(O)[C@]([C@H]3[C@@]4(C)[C@]([H])5C6=C(C(C)C)CC[C@@](C)6CC4)([H])C1=C[C@@H]5O
LJHM01	RESPIRATORY	Mycobacterium chimaera	[u'TYPE_I_POLYKETIDE']	[u'PKS']	15	[u'a-Methyldethiobiotin', u'a-MDB', u'LIBRAMYCIN-A', u'A".5-DIMETHYL-2-OXO-4-IMIDAZOLIDINEHEXANOIC ACID']	0.875776	O=C(N[C@]([H])1CCCCC(C)C(O)=O)N[C@]1([H])C
AHRQ01	ORAL	Streptococcus mutans 4VF1	[u'TYPE_I_POLYKETIDE']	[u'PKS']	2	[u'8A"-ACETOXYMULTIPLOLIDE-A']	0.721116	C[C@@H]1C[C@@H](OC(C)=O)[C@@H](O)\C=C\[C@@H]2O[C@@H]2C(=O)O1
AFPH01	GI	Mycobacterium avium subsp. paratuberculosis Pt155	[u'TYPE_I_POLYKETIDE']	[u'PKS']	9	[u'STRIATIN-B']	0.965686	O[C@](O[C@H]1OC)([C@@H]2OC(C)=O)[C@]([C@@H](OC2)O3)(O)[C@]([C@H]3[C@@]4(C)[C@]([H])5C6=C(C(C)C)CC[C@@](C)6CC4)([H])C1=C[C@@H]5O
AFPH01	GI	Mycobacterium avium subsp. paratuberculosis Pt155	[u'TYPE_I_POLYKETIDE']	[u'PKS']	14	[u'Sorbistin A1', u'P 2563-I', u'P-2563-B', u'P 2563 P', u'GL A1', u'LL-AM 31beta', u'AM 31beta', u'BN-186-A', u'SORBISTIN-A1', u'BU-2183-A', u'LL-AM-31-B"']	0.918033	O=C(CC)N[C@@H]1[C@@H](CO)O[C@H](OC(C(CN)O)C(N)C(CO)O)[C@H](O)[C@H]1O
AHRR01	ORAL	Streptococcus mutans 15VF2	[u'TYPE_I_POLYKETIDE']	[u'PKS']	5	[u'8A"-ACETOXYMULTIPLOLIDE-A']	0.721116	C[C@@H]1C[C@@H](OC(C)=O)[C@@H](O)\C=C\[C@@H]2O[C@@H]2C(=O)O1
JAOS01	RESPIRATORY	Mycobacterium sp. MAC_080597_8934	[u'TYPE_I_POLYKETIDE']	[u'PKS']	9	[u'Karnamicin C4']	0.875776	O=C(N)C1=C(O)C(OC)=C(C(C2=CSC(CCC(C)C(C)=O)=N2)=N1)OC
AFPE01	GI	Mycobacterium avium subsp. paratuberculosis Pt145	[u'TYPE_I_POLYKETIDE']	[u'PKS']	3	[u'STRIATIN-B']	0.965686	O[C@](O[C@H]1OC)([C@@H]2OC(C)=O)[C@]([C@@H](OC2)O3)(O)[C@]([C@H]3[C@@]4(C)[C@]([H])5C6=C(C(C)C)CC[C@@](C)6CC4)([H])C1=C[C@@H]5O
AFPE01	GI	Mycobacterium avium subsp. paratuberculosis Pt145	[u'TYPE_I_POLYKETIDE']	[u'PKS']	7	[u'Sorbistin A1', u'P 2563-I', u'P-2563-B', u'P 2563 P', u'GL A1', u'LL-AM 31beta', u'AM 31beta', u'BN-186-A', u'SORBISTIN-A1', u'BU-2183-A', u'LL-AM-31-B"']	0.918033	O=C(CC)N[C@@H]1[C@@H](CO)O[C@H](OC(C(CN)O)C(N)C(CO)O)[C@H](O)[C@H]1O
AUWQ01	RESPIRATORY	Mycobacterium sp. UM_CSW	[u'TYPE_I_POLYKETIDE']	[u'PKS']	18	[u'a-Methyldethiobiotin', u'a-MDB', u'LIBRAMYCIN-A', u'A".5-DIMETHYL-2-OXO-4-IMIDAZOLIDINEHEXANOIC ACID']	0.875776	O=C(N[C@]([H])1CCCCC(C)C(O)=O)N[C@]1([H])C
AHRK01	ORAL	Streptococcus mutans 1SM1	[u'TYPE_I_POLYKETIDE']	[u'PKS']	5	[u'8A"-ACETOXYMULTIPLOLIDE-A']	0.721116	C[C@@H]1C[C@@H](OC(C)=O)[C@@H](O)\C=C\[C@@H]2O[C@@H]2C(=O)O1
AHSW01	ORAL	Streptococcus mutans NLML1	[u'TYPE_I_POLYKETIDE']	[u'PKS']	2	[u'8A"-ACETOXYMULTIPLOLIDE-A']	0.721116	C[C@@H]1C[C@@H](OC(C)=O)[C@@H](O)\C=C\[C@@H]2O[C@@H]2C(=O)O1
AMEM01	ORAL	Corynebacterium durum F0235	[u'TYPE_I_POLYKETIDE']	[u'PKS']	2	[u'STRIATIN-B']	0.965686	O[C@](O[C@H]1OC)([C@@H]2OC(C)=O)[C@]([C@@H](OC2)O3)(O)[C@]([C@H]3[C@@]4(C)[C@]([H])5C6=C(C(C)C)CC[C@@](C)6CC4)([H])C1=C[C@@H]5O
JOTY01	URINE	Burkholderia pseudomallei	[u'TYPE_I_POLYKETIDE']	[u'PKS']	14	[u'STRIATIN-B']	0.965686	O[C@](O[C@H]1OC)([C@@H]2OC(C)=O)[C@]([C@@H](OC2)O3)(O)[C@]([C@H]3[C@@]4(C)[C@]([H])5C6=C(C(C)C)CC[C@@](C)6CC4)([H])C1=C[C@@H]5O
AKVU01	RESPIRATORY	Mycobacterium abscessus M156	[u'TYPE_I_POLYKETIDE']	[u'PKS']	14	[u'TAN-1518-X', u'SF-2575']	0.790323	O=C1C(C(N)=O)=C(O)[C@H](OC(C2=CC=CC=C2O)=O)[C@@]3([H])C1(OC)C(O)=C4C(C(C(O)=C5[C@]6([H])O[C@@H]([C@@H](OC(/C(C)=C\C)=O)[C@H](O)C6)C)=C(C=C5)[C@@](OC)(C)[C@]([H])4C3)=O
AKIG01	RESPIRATORY	Mycobacterium sp. H4Y	[u'TYPE_I_POLYKETIDE']	[u'PKS']	11	[u'a-Methyldethiobiotin', u'a-MDB', u'LIBRAMYCIN-A', u'A".5-DIMETHYL-2-OXO-4-IMIDAZOLIDINEHEXANOIC ACID']	0.875776	O=C(N[C@]([H])1CCCCC(C)C(O)=O)N[C@]1([H])C
AFPF01	GI	Mycobacterium avium subsp. paratuberculosis Pt146	[u'TYPE_I_POLYKETIDE']	[u'PKS']	11	[u'STRIATIN-B']	0.965686	O[C@](O[C@H]1OC)([C@@H]2OC(C)=O)[C@]([C@@H](OC2)O3)(O)[C@]([C@H]3[C@@]4(C)[C@]([H])5C6=C(C(C)C)CC[C@@](C)6CC4)([H])C1=C[C@@H]5O
AFPF01	GI	Mycobacterium avium subsp. paratuberculosis Pt146	[u'TYPE_I_POLYKETIDE']	[u'PKS']	15	[u'Sorbistin A1', u'P 2563-I', u'P-2563-B', u'P 2563 P', u'GL A1', u'LL-AM 31beta', u'AM 31beta', u'BN-186-A', u'SORBISTIN-A1', u'BU-2183-A', u'LL-AM-31-B"']	0.918033	O=C(CC)N[C@@H]1[C@@H](CO)O[C@H](OC(C(CN)O)C(N)C(CO)O)[C@H](O)[C@H]1O
AFPF01	GI	Mycobacterium avium subsp. paratuberculosis Pt146	[u'TYPE_I_POLYKETIDE']	[u'PKS']	20	[u'TAN-1518-X', u'SF-2575']	1	O=C1C(C(N)=O)=C(O)[C@H](OC(C2=CC=CC=C2O)=O)[C@@]3([H])C1(OC)C(O)=C4C(C(C(O)=C5[C@]6([H])O[C@@H]([C@@H](OC(/C(C)=C\C)=O)[C@H](O)C6)C)=C(C=C5)[C@@](OC)(C)[C@]([H])4C3)=O
CDUC01	CSF	Streptococcus suis	[u'RIBOSOMAL']	[u'CLASS_II_LANTIPEPTIDE']	2	88_["A-3802-VI-7"]	0.678571	O=C(O)CCC4NC(=O)C(NC(=O)C6NC(=O)C(NC(=O)C(NC(=O)C1NC(=O)C(NC(=O)C(NC(=O)CNC(=O)C(NC(=O)C(NC(=O)C)CSC1)CO)Cc3c[nH]c2ccccc23)C(C)C)C(C)SCC(NC4(=O))C(=O)NCC(=O)NC5C(=O)NC(C(=O)NC(C(=O)NC(C(=O)NC(C(=O)NC(C(=O)OC)CS(=O)C5(C))C)CSC6(C))C(C)CC)C(C)C)CC(C)C)C(C)CC
CEBG01	CSF	Streptococcus suis	[u'RIBOSOMAL']	[u'CLASS_II_LANTIPEPTIDE']	1	88_["A-3802-VI-7"]	0.678571	O=C(O)CCC4NC(=O)C(NC(=O)C6NC(=O)C(NC(=O)C(NC(=O)C1NC(=O)C(NC(=O)C(NC(=O)CNC(=O)C(NC(=O)C(NC(=O)C)CSC1)CO)Cc3c[nH]c2ccccc23)C(C)C)C(C)SCC(NC4(=O))C(=O)NCC(=O)NC5C(=O)NC(C(=O)NC(C(=O)NC(C(=O)NC(C(=O)NC(C(=O)OC)CS(=O)C5(C))C)CSC6(C))C(C)CC)C(C)C)CC(C)C)C(C)CC
AGMN01	ORAL	Streptococcus mutans TCI-30	[u'RIBOSOMAL']	[u'CLASS_II_BACTERIOCIN']	3	69_Antimicrobial protein BL-A60	0.545455		MLVDILTIKKGGIHMNTKMMEQFETMDAETLSHVTGGGLYDGANGYAYRDSQGHWAYKVTKTPAQALTDVVVNSWASGAASFAAYA
ALYV01	ORAL	Streptococcus mutans B24Sm2	[u'RIBOSOMAL']	[u'CLASS_II_BACTERIOCIN']	7	69_Antimicrobial protein BL-A60	0.545455		MNTKMMEQFETMDAETLSHVTGGGLYDGANGYAYRDSQGHWAYKVTKTPAQALTDVVVNSWASGAASFAAYA
AGKF01	ORAL	Streptococcus mutans TCI-101	[u'RIBOSOMAL']	[u'CLASS_II_BACTERIOCIN']	2	69_Antimicrobial protein BL-A60	0.545455		MNTRMMEQFETMDAETLSHVTGGGLYDGANGYAYRDSQGHWAYKVTKTPAQALTDVVVNSWASGAASFAAYA
AOCB01	ORAL	Streptococcus mutans ATCC 25175	[u'RIBOSOMAL']	[u'CLASS_II_BACTERIOCIN']	2	69_Antimicrobial protein BL-A60	0.545455		MNTRMMEQFETMDAETLSHVTGGGLYDGANGYAYRDSQGHWAYKVTKTPAQALTDVVVNSWASGAASFAAYA
LODG01	STOOL	Escherichia coli	[u'RIBOSOMAL']	[u'LINEAR_AZOLE_CONTAINING_PEPTIDE']	3	601_["MccB17","MICROCIN B17","MICROCIN 17W"]	1	O=C(O)C(N=C(O)C(N=C(O)C(N=C(O)CN=C(O)c1nc(oc1)CN=C(O)CN=C(O)c2nc(oc2)CN=C(O)CN=C(O)C(N=C(O)CN=C(O)CN=C(O)c3nc(oc3)c8nc(CN=C(O)C(N=C(O)C(N=C(O)c7nc(CN=C(O)CN=C(O)c6nc(CN=C(O)CN=C(O)CN=C(O)C(N=C(O)CN=C(O)CN=C(O)c5nc(c4nc(oc4)CN=C(O)CN=C(O)CN=C(O)CN=C(O)CN=C(O)CN=C(O)CN=C(O)CN=C(O)CN=C(O)CN=C(O)C(N=C(O)CN=C(O)C(N)C(C)C)C(C)CC)sc5)CCC(=N)O)sc6)sc7)CO)CC(=N)O)sc8)CC(=N)O)CO)Cc9cnc[nH]9)C(C)CC
JGPC01	RESPIRATORY	Staphylococcus aureus DAR3760	[u'RIBOSOMAL']	[u'BACTERIAL_HEAD_TO_TAIL_CYCLIZED']	3	595_Syanodin I	0.590909	CC(C[C@@H](C(N[C@H](C(NCC(O)=O)=O)C)=O)NC(CNC([C@@H](NC(CNC([C@@H](NC([C@@H]1CCCN1C([C@@H](NC([C@@H]2CC(NCC(N[C@H](C(N[C@H](C(NCC(NCC(N[C@H](C(N[C@H](C(N2)=O)C(C)C)=O)[C@H](O)C)=O)=O)=O)CO)=O)CC(C)C)=O)=O)=O)C)=O)=O)C)=O)=O)CCC(N)=O)=O)=O)C
LNLV01	STOOL	Enterococcus faecium	[u'RIBOSOMAL']	[u'CLASS_II_BACTERIOCIN']	1	16_Bacteriocin T8	1		MKKKVLKHCVILGILGTCLAGIGTGIKVDAATYYGNGLYCNKEKCWVDWNQAKGEIGKIIVNGWVNHGPWAPRR
LNLV01	STOOL	Enterococcus faecium	[u'RIBOSOMAL']	[u'CLASS_II_BACTERIOCIN']	2	40_Enterocin A	1		MKHLKILSIKETQLIYGGTTHSGKYYGNGVYCTKNKCTVDWAKATTCIAGMSIGGFLGGAIPGKC
AHSI01	ORAL	Streptococcus mutans NLML5	[u'RIBOSOMAL']	[u'CLASS_II_LANTIPEPTIDE']	1	114_["MUTACIN-II","MUTACIN-T8"]	0.95	O=C(O)CCC6NC(=O)C(NC(=O)C8NC(=O)C(NC(=O)C(NC(=O)C5N(C(=O)C(NC(=O)C(NC(=O)CNC(=O)C(NC(=O)C(NC(=O)C(NC(=O)C(NC(=O)CC(=O)N)CCCNC(=N)N)Cc2c[nH]c1ccccc12)Cc4c[nH]c3ccccc34)CCC(=O)N)C(C)C)C(C)C)CCC5)C(C)SCC(NC6(=O))C(=O)NC(C(=O)NC(C(=O)NC(C(=O)NC7C(=O)NC(C(=O)NC(C(=O)NC(C(=O)NC(C(=O)NC(C(=O)NC(=CC)C(=O)NC(C(=O)NC(C(=O)O)CSC7)CSC8)Cc9ccccc9)C(C)C)Cc%10nc[nH]c%10)CCC(=O)N)Cc%12c[nH]c%11ccccc%11%12)CC(=O)…
AHSI01	ORAL	Streptococcus mutans NLML5	[u'RIBOSOMAL']	[u'CLASS_II_BACTERIOCIN']	4	69_Antimicrobial protein BL-A60	0.545455		MNTRMMEQFETMDAETLSHVTGGDLYDGANGYAYRDSQGHWAYKVTKTPAQALTDVVVNSWASGAASFAAYA
ACWC01	ORAL	Bacillus sp. BT1B_CT2	[u'RIBOSOMAL']	[u'LASSO_PEPTIDE']	4	539_["MICROVIRIDIN E"]	0.611111	[H]C2(OC(=O)CC4([H])(NC(=O)C([H])(NC(=O)C8([H])(N(C(=O)C([H])(NC(=O)C([H])(NC(=O)C([H])(NC(=O)C2([H])(NC(=O)C([H])(NC(=O)C([H])(NC(=O)C)Cc1ccccc1)CO))Cc3ccc(O)cc3)CCCCNC(=O)CC([H])(NC(=O)C(NC(=O)C([H])(NC4(=O))Cc5ccccc5)CCC(=O)OC)C(=O)NC([H])(C(=O)O)Cc6ccc(O)cc6)Cc7ccc(O)cc7)CCC8))CO))(C)
ACWC01	ORAL	Bacillus sp. BT1B_CT2	[u'RIBOSOMAL']	[u'CLASS_II_LANTIPEPTIDE']	5	149_["Lichenicidin A1"]	1	CCC(C(C(NC(C(NC(C(NC(C(N1CCCC1C(NC(C(NCC(NC(C(NC(C(NCC(NC(C(NC2CC(C)C)=O)Cc3ccc(O)cc3)=O)=O)CC(N)=O)=O)CC(N)=O)=O)=O)CC(C)C)=O)=O)CCCCN)=O)CSCC(C(NC(C(NC(C(NC(C(NC(C(NC(C(NC(C(NC(C(N4CCCC4C(NC(C(NC(C(NC(C(O)=O)CC(N)=O)=O)CS5)=O)CO)=O)=O)CCSC)=O)CS6)=O)CCC(O)=O)=O)CCCCN)=O)C5C)=O)C(C)C)=O)C6C)=O)NC2=O)=O)CC(C)C)=O)NC(C(NC(C(NC(/C(NC(C(NC(C(NC(/C(CC(C(C(CC)C)N7)=O)=C\C)=O)CC(C)C)=O)=C)=O)=C\C)=O)CS…
LTVB01	RESPIRATORY	Enterococcus sp. HMSC063C12	[u'RIBOSOMAL']	[u'CLASS_II_BACTERIOCIN']	1	40_Enterocin A	1		MKHLKILSIKETQLIYGGTTHSGKYYGNGVYCTKNKCTVDWAKATTCIAGMSIGGFLGGAIPGKC
AGLB01	ORAL	Streptococcus mutans TCI-173	[u'RIBOSOMAL']	[u'CLASS_II_BACTERIOCIN']	2	69_Antimicrobial protein BL-A60	0.545455		MLVDILTIKKGGIHMNTRMMEQFETMDAETLSHVTGGGLYDGANGYAYRDSQGHWAYKVTKTPAQALTDVVVNSWASGAASFAAYA
LTLX01	SKIN	Staphylococcus sp. HMSC70F07	[u'RIBOSOMAL']	[u'BACTERIAL_HEAD_TO_TAIL_CYCLIZED']	3	595_Syanodin I	0.590909	CC(C[C@@H](C(N[C@H](C(NCC(O)=O)=O)C)=O)NC(CNC([C@@H](NC(CNC([C@@H](NC([C@@H]1CCCN1C([C@@H](NC([C@@H]2CC(NCC(N[C@H](C(N[C@H](C(NCC(NCC(N[C@H](C(N[C@H](C(N2)=O)C(C)C)=O)[C@H](O)C)=O)=O)=O)CO)=O)CC(C)C)=O)=O)=O)C)=O)=O)C)=O)=O)CCC(N)=O)=O)=O)C
AHSP01	ORAL	Streptococcus mutans SF1	[u'RIBOSOMAL']	[u'CLASS_II_LANTIPEPTIDE']	5	127_["VARIACIN"]	0.688889	CCC(C(C(NC(C(NC(C(NC(C(NC(C(NC(C(NC(C(NC(C(NC(C(NC(C(NC(C(NC(C(NC(C(NC(C(N/C1=C/C)=O)Cc2ccccc2)=O)C(C)C)=O)Cc3ccccc3)=O)CCC(N)=O)=O)Cc4ccccc4)=O)CSCC(C(NC(C(O)=O)=C)=O)NC5=O)=O)CC(N)=O)=O)CCSC)=O)Cc6nc[nH]c6)=O)CS7)=O)CCC(O)=O)=O)Cc8nc[nH]c8)=O)CSCC5NC1=O)=O)NC(C(C7C)NC(C9CCCN9C(C(C(CC)C)NC(C(C(C)C)NC(CNC(C(NC(CN)=O)=C)=O)=O)=O)=O)=O)=O)C
AHSP01	ORAL	Streptococcus mutans SF1	[u'RIBOSOMAL']	[u'CLASS_II_BACTERIOCIN']	10	69_Antimicrobial protein BL-A60	0.545455		MFYHLVFTPKYRRKIIYNQYRSSLGEIFQRLCSYKDVEIIEGHLMPDHVHMLVSLPPRISVSSFMGYLKGKSALMMFDKHANLKYKFGNAMRVRIECYTKNLQTRYNKGVQAYCKAKGAKDGTKGT*MLVDILTIKKGGIHMNTKMMKQFETMDAETLSHITGGGLYDGANGYAYRDSQGHWAYKVTKTPAQALTDVVVNSWASGAASFAAYA
CTEO01	SKIN	Staphylococcus capitis	[u'RIBOSOMAL']	[u'CLASS_I_LANTIPEPTIDE']	1	106_["Lanthionine containing peptide","HYICIN M51"]	0.666667	O=C(N)CC5NC(=O)C(NC(=O)C(NC(=O)CNC(=O)C(=CC)NC(=O)C(NC(=O)C(NC(=O)C3NC(=O)CNC(=O)C4N(C(=O)C(NC(=O)C1NC(=O)C(NC(=O)C(NC(=O)C(=C)NC(=O)C(NC(=O)C(=CC)NC(=O)C(N)C(C)CC)CSC1)Cc2ccccc2)CC(C)C)C(C)SC3)CCC4)C)CCCCN)CSCC6NC(=O)C(NC(=O)C(NC5(=O))CSC=CNC6(=O))Cc7ccc(O)cc7)Cc8ccccc8
LNLB01	STOOL	Enterococcus faecium	[u'RIBOSOMAL']	[u'CLASS_II_BACTERIOCIN']	2	16_Bacteriocin T8	1		MKKKVLKHCVILGILGTCLAGIGTGIKVDAATYYGNGLYCNKEKCWVDWNQAKGEIGKIIVNGWVNHGPWAPRR
JGTL01	URINE	Staphylococcus aureus DAR2067	[u'RIBOSOMAL']	[u'BACTERIAL_HEAD_TO_TAIL_CYCLIZED']	2	595_Syanodin I	0.590909	CC(C[C@@H](C(N[C@H](C(NCC(O)=O)=O)C)=O)NC(CNC([C@@H](NC(CNC([C@@H](NC([C@@H]1CCCN1C([C@@H](NC([C@@H]2CC(NCC(N[C@H](C(N[C@H](C(NCC(NCC(N[C@H](C(N[C@H](C(N2)=O)C(C)C)=O)[C@H](O)C)=O)=O)=O)CO)=O)CC(C)C)=O)=O)=O)C)=O)=O)C)=O)=O)CCC(N)=O)=O)=O)C
JYAS01	FEET	Staphylococcus aureus	[u'RIBOSOMAL']	[u'BACTERIAL_HEAD_TO_TAIL_CYCLIZED']	3	569_["XANTHOMONIN II"]	0.578947	CC(C)C[C@@H](C(N[C@@H](C)C(NCC(N[C@H](C(N[C@H](C(N[C@@H](CCSC)C(NCC(NCC(N[C@@H]([C@H](CC)C)C(N[C@H](C(N[C@H](C(O)=O)[C@@H](C)O)=O)[C@@H](C)O)=O)=O)=O)=O)=O)CCC(O)=O)=O)CC1)=O)=O)=O)NC([C@@H]2CCCN2C(CNC(CNC1=O)=O)=O)=O
CDUP01	CSF	Streptococcus suis	[u'RIBOSOMAL']	[u'CLASS_II_LANTIPEPTIDE']	1	88_["A-3802-VI-7"]	0.678571	O=C(O)CCC4NC(=O)C(NC(=O)C6NC(=O)C(NC(=O)C(NC(=O)C1NC(=O)C(NC(=O)C(NC(=O)CNC(=O)C(NC(=O)C(NC(=O)C)CSC1)CO)Cc3c[nH]c2ccccc23)C(C)C)C(C)SCC(NC4(=O))C(=O)NCC(=O)NC5C(=O)NC(C(=O)NC(C(=O)NC(C(=O)NC(C(=O)NC(C(=O)OC)CS(=O)C5(C))C)CSC6(C))C(C)CC)C(C)C)CC(C)C)C(C)CC
JNRX01	STOOL	Escherichia coli 3-073-06_S3_C2	[u'RIBOSOMAL']	[u'LINEAR_AZOLE_CONTAINING_PEPTIDE']	4	601_["MccB17","MICROCIN B17","MICROCIN 17W"]	0.924528	O=C(O)C(N=C(O)C(N=C(O)C(N=C(O)CN=C(O)c1nc(oc1)CN=C(O)CN=C(O)c2nc(oc2)CN=C(O)CN=C(O)C(N=C(O)CN=C(O)CN=C(O)c3nc(oc3)c8nc(CN=C(O)C(N=C(O)C(N=C(O)c7nc(CN=C(O)CN=C(O)c6nc(CN=C(O)CN=C(O)CN=C(O)C(N=C(O)CN=C(O)CN=C(O)c5nc(c4nc(oc4)CN=C(O)CN=C(O)CN=C(O)CN=C(O)CN=C(O)CN=C(O)CN=C(O)CN=C(O)CN=C(O)CN=C(O)C(N=C(O)CN=C(O)C(N)C(C)C)C(C)CC)sc5)CCC(=N)O)sc6)sc7)CO)CC(=N)O)sc8)CC(=N)O)CO)Cc9cnc[nH]9)C(C)CC
JGTI01	RESPIRATORY	Staphylococcus aureus DAR2018	[u'RIBOSOMAL']	[u'BACTERIAL_HEAD_TO_TAIL_CYCLIZED']	3	554_["ANANTIN","ANF ANTAGONIST"]	0.590909	O=C(O)CC(NC(=O)CNC(=O)C(NC(=O)C(NC(=O)C(NC(=O)CNC(=O)C(NC(=O)C(NC(=O)C1NC(=O)C(NC(=O)CNC(=O)C(NC(=O)CNC(=O)C(NC(=O)C(NC(=O)CNC(=O)C1)Cc2ccccc2)C(C)CC)Cc4c[nH]c3ccccc34)CC(=O)N)C(C)CC)Cc5ccccc5)Cc6cnc[nH]6)Cc7ccc(O)cc7)CO)C(=O)NC(C(=O)O)Cc8ccccc8
LRHA01	SKIN	Streptococcus pyogenes	[u'RIBOSOMAL']	[u'LINEAR_AZOLE_CONTAINING_PEPTIDE']	2	600_["PLANTAZOLICIN B"]	0.789474	O=C(O)C(N=C(O)C1N=C(OC1(C))c2nc(oc2)c3nc(oc3)c4nc(oc4)c5nc(oc5)C(N=C(O)C(N=C(O)c6nc(oc6C)c7nc(oc7C)c%10nc(c8nc(oc8C)c9nc(C(N)CCCNC(=N)N)sc9)sc%10)C(C)CC)C(C)CC)Cc%11ccccc%11
LRHA01	SKIN	Streptococcus pyogenes	[u'RIBOSOMAL']	[u'CLASS_I_LANTIPEPTIDE']	3	124_["STREPTIN"]	1	CC(CC1NC(C(NC(C(NC(C(NC(CNC(C(C(C)C)N)=O)=O)CSCC(C(NC(C(N2CCCC2C(NCC(NC(C(NC(C(NC(C(NC(C(NC(C(NC3C(C)C)=O)CC(C)C)=O)CCCCN)=O)CC4=CNc5c4cccc5)=O)CS6)=O)CSCC(C(NC(C(N/C(C(N/C(C(N/C(C(NC(C(NC(C(O)=O)CCCCN)=O)C(C)C)=O)=C/C)=O)=C/C)=O)=C/C)=O)Cc7ccccc7)=O)NC3=O)=O)=O)=O)C6C)=O)NC1=O)=O)CCCNC(N)=N)=O)Cc8ccc(O)cc8)=O)C
LRHA01	SKIN	Streptococcus pyogenes	[u'RIBOSOMAL']	[u'CLASS_II_LANTIPEPTIDE']	5	121_["SALIVARICIN A"]	0.9375	CCC(C(C(NC(C(NC(C(NC(C(NC(C(NC(C(NC(C(NC(C(N1CCCC1C(NC(C(NC(C(NC(C(NC(C(NC(C(NC2CS3)=O)C(C)C)=O)Cc4ccccc4)=O)C(C)C)=O)CSCC(C(O)=O)NC2=O)=O)CC(N)=O)=O)=O)CS5)=O)CC(O)=O)=O)CC(O)=O)=O)C3C)=O)C(CC)C)=O)C5C)=O)C)=O)NC(C(NC(CNC(C(NC(CNC(C(NC(C(CCCCN)N)=O)CCCNC(N)=N)=O)=O)CO)=O)=O)CC6=CNc7c6cccc7)=O)C
AGLV01	ORAL	Streptococcus mutans TCI-234	[u'RIBOSOMAL']	[u'CLASS_II_BACTERIOCIN']	2	69_Antimicrobial protein BL-A60	0.545455		MLVDILTIKKGGIHMNTRMMEQFETMDAETLSHVTGGGLYDGANGYAYRDSQGHWAYKVTKTPAQALTDVVVNSWASGAASFAAYA
LNLF01	STOOL	Enterococcus faecium	[u'RIBOSOMAL']	[u'CLASS_II_BACTERIOCIN']	1	16_Bacteriocin T8	1		MKKKVLKHCVILGILGTCLAGIGTGIKVDAATYYGNGLYCNKEKCWVDWNQAKGEIGKIIVNGWVNHGPWAPRR
LFVB01	SKIN	Staphylococcus aureus subsp. aureus	[u'RIBOSOMAL']	[u'CLASS_I_LANTIPEPTIDE']	4	105_["Lanthionine containing peptide","HYICIN M51"]	0.952381	O=C(N)CC5NC(=O)C(NC(=O)C(NC(=O)CNC(=O)C(=CC)NC(=O)C(NC(=O)C(NC(=O)C3NC(=O)CNC(=O)C4N(C(=O)C(NC(=O)C1NC(=O)C(NC(=O)C(=C)NC(=O)C(NC(=O)C(NC(=O)C(=CC)NC(=O)C(N)C(C)CC)CSC1)Cc2ccccc2)CC(C)C)C(C)SC3)CCC4)C)CCCCN)CSCC6NC(=O)C(NC(=O)C(NC5(=O))CSC=CNC6(=O))Cc7ccc(O)cc7)Cc8ccccc8
LNME01	STOOL	Enterococcus faecium	[u'RIBOSOMAL']	[u'CLASS_II_BACTERIOCIN']	1	40_Enterocin A	1		MKHLKILSIKETQLIYGGTTHSGKYYGNGVYCTKNKCTVDWAKATTCIAGMSIGGFLGGAIPGKC
LNME01	STOOL	Enterococcus faecium	[u'RIBOSOMAL']	[u'CLASS_II_BACTERIOCIN']	4	16_Bacteriocin T8	1		MKKKVLKHCVILGILGTCLAGIGTGIKVDAATYYGNGLYCNKEKCWVDWNQAKGEIGKIIVNGWVNHGPWAPRR
LABV01	STOOL	Bacillus cereus	[u'RIBOSOMAL']	[u'SACTIPEPTIDE']	10	607_["THURINCIN H"]	0.972222	NC(CC(O)=O)C(NC(CC1=CNC2=C1C=CC=C2)C(NC(C(NC(CS3)C(NC(CC4=CNC5=C4C=CC=C5)C(NC(C(NC(CS6)C(NC(C(NC(C(NC(CS7)C(NC(C)C(NC(C)C(NC(CS8)C(NC(C(NC(C(NC(C(NC(C(NC(C(NC8(C(NC(C(NC(C(NC7(C(NC(C)C(NC(C)C(NC6(C(NCC(NC(C)C(NC3(C(NC(C(NC(C)C(NC(C(O)=O)CO)=O)=O)C(C)O)=O)CO)=O)=O)=O)C(C)O)=O)=O)=O)C(C)O)=O)C(C)C)=O)CC(C)C)=O)CC(N)=O)=O)CC(C)C)=O)CC(C)C)=O)CCC(O)=O)=O)C(C)C)=O)CO)=O)=O)=O)=O)=O)C(C)C)=O)CC(C)C)=O)…
LVYO01	ORAL	Streptococcus pyogenes	[u'RIBOSOMAL']	[u'LINEAR_AZOLE_CONTAINING_PEPTIDE']	1	600_["PLANTAZOLICIN B"]	0.789474	O=C(O)C(N=C(O)C1N=C(OC1(C))c2nc(oc2)c3nc(oc3)c4nc(oc4)c5nc(oc5)C(N=C(O)C(N=C(O)c6nc(oc6C)c7nc(oc7C)c%10nc(c8nc(oc8C)c9nc(C(N)CCCNC(=N)N)sc9)sc%10)C(C)CC)C(C)CC)Cc%11ccccc%11
LVYO01	ORAL	Streptococcus pyogenes	[u'RIBOSOMAL']	[u'CLASS_I_LANTIPEPTIDE']	3	124_["STREPTIN"]	1	CC(CC1NC(C(NC(C(NC(C(NC(CNC(C(C(C)C)N)=O)=O)CSCC(C(NC(C(N2CCCC2C(NCC(NC(C(NC(C(NC(C(NC(C(NC(C(NC3C(C)C)=O)CC(C)C)=O)CCCCN)=O)CC4=CNc5c4cccc5)=O)CS6)=O)CSCC(C(NC(C(N/C(C(N/C(C(N/C(C(NC(C(NC(C(O)=O)CCCCN)=O)C(C)C)=O)=C/C)=O)=C/C)=O)=C/C)=O)Cc7ccccc7)=O)NC3=O)=O)=O)=O)C6C)=O)NC1=O)=O)CCCNC(N)=N)=O)Cc8ccc(O)cc8)=O)C
LVYO01	ORAL	Streptococcus pyogenes	[u'RIBOSOMAL']	[u'CLASS_II_LANTIPEPTIDE']	5	121_["SALIVARICIN A"]	0.9375	CCC(C(C(NC(C(NC(C(NC(C(NC(C(NC(C(NC(C(NC(C(N1CCCC1C(NC(C(NC(C(NC(C(NC(C(NC(C(NC2CS3)=O)C(C)C)=O)Cc4ccccc4)=O)C(C)C)=O)CSCC(C(O)=O)NC2=O)=O)CC(N)=O)=O)=O)CS5)=O)CC(O)=O)=O)CC(O)=O)=O)C3C)=O)C(CC)C)=O)C5C)=O)C)=O)NC(C(NC(CNC(C(NC(CNC(C(NC(C(CCCCN)N)=O)CCCNC(N)=N)=O)=O)CO)=O)=O)CC6=CNc7c6cccc7)=O)C
LRGY01	SKIN	Streptococcus pyogenes	[u'RIBOSOMAL']	[u'LINEAR_AZOLE_CONTAINING_PEPTIDE']	1	600_["PLANTAZOLICIN B"]	0.789474	O=C(O)C(N=C(O)C1N=C(OC1(C))c2nc(oc2)c3nc(oc3)c4nc(oc4)c5nc(oc5)C(N=C(O)C(N=C(O)c6nc(oc6C)c7nc(oc7C)c%10nc(c8nc(oc8C)c9nc(C(N)CCCNC(=N)N)sc9)sc%10)C(C)CC)C(C)CC)Cc%11ccccc%11
LRGY01	SKIN	Streptococcus pyogenes	[u'RIBOSOMAL']	[u'CLASS_II_LANTIPEPTIDE']	2	121_["SALIVARICIN A"]	0.9375	CCC(C(C(NC(C(NC(C(NC(C(NC(C(NC(C(NC(C(NC(C(N1CCCC1C(NC(C(NC(C(NC(C(NC(C(NC(C(NC2CS3)=O)C(C)C)=O)Cc4ccccc4)=O)C(C)C)=O)CSCC(C(O)=O)NC2=O)=O)CC(N)=O)=O)=O)CS5)=O)CC(O)=O)=O)CC(O)=O)=O)C3C)=O)C(CC)C)=O)C5C)=O)C)=O)NC(C(NC(CNC(C(NC(CNC(C(NC(C(CCCCN)N)=O)CCCNC(N)=N)=O)=O)CO)=O)=O)CC6=CNc7c6cccc7)=O)C
CDXE01	CSF	Streptococcus suis	[u'RIBOSOMAL']	[u'CLASS_II_LANTIPEPTIDE']	2	88_["A-3802-VI-7"]	0.678571	O=C(O)CCC4NC(=O)C(NC(=O)C6NC(=O)C(NC(=O)C(NC(=O)C1NC(=O)C(NC(=O)C(NC(=O)CNC(=O)C(NC(=O)C(NC(=O)C)CSC1)CO)Cc3c[nH]c2ccccc23)C(C)C)C(C)SCC(NC4(=O))C(=O)NCC(=O)NC5C(=O)NC(C(=O)NC(C(=O)NC(C(=O)NC(C(=O)NC(C(=O)OC)CS(=O)C5(C))C)CSC6(C))C(C)CC)C(C)C)CC(C)C)C(C)CC
AWPB01	ORAL	Streptococcus pyogenes SP4-LAU	[u'RIBOSOMAL']	[u'LINEAR_AZOLE_CONTAINING_PEPTIDE']	2	600_["PLANTAZOLICIN B"]	0.789474	O=C(O)C(N=C(O)C1N=C(OC1(C))c2nc(oc2)c3nc(oc3)c4nc(oc4)c5nc(oc5)C(N=C(O)C(N=C(O)c6nc(oc6C)c7nc(oc7C)c%10nc(c8nc(oc8C)c9nc(C(N)CCCNC(=N)N)sc9)sc%10)C(C)CC)C(C)CC)Cc%11ccccc%11
AWPB01	ORAL	Streptococcus pyogenes SP4-LAU	[u'RIBOSOMAL']	[u'CLASS_I_LANTIPEPTIDE']	3	124_["STREPTIN"]	1	CC(CC1NC(C(NC(C(NC(C(NC(CNC(C(C(C)C)N)=O)=O)CSCC(C(NC(C(N2CCCC2C(NCC(NC(C(NC(C(NC(C(NC(C(NC(C(NC3C(C)C)=O)CC(C)C)=O)CCCCN)=O)CC4=CNc5c4cccc5)=O)CS6)=O)CSCC(C(NC(C(N/C(C(N/C(C(N/C(C(NC(C(NC(C(O)=O)CCCCN)=O)C(C)C)=O)=C/C)=O)=C/C)=O)=C/C)=O)Cc7ccccc7)=O)NC3=O)=O)=O)=O)C6C)=O)NC1=O)=O)CCCNC(N)=N)=O)Cc8ccc(O)cc8)=O)C
AWPB01	ORAL	Streptococcus pyogenes SP4-LAU	[u'RIBOSOMAL']	[u'CLASS_II_LANTIPEPTIDE']	5	121_["SALIVARICIN A"]	0.9375	CCC(C(C(NC(C(NC(C(NC(C(NC(C(NC(C(NC(C(NC(C(N1CCCC1C(NC(C(NC(C(NC(C(NC(C(NC(C(NC2CS3)=O)C(C)C)=O)Cc4ccccc4)=O)C(C)C)=O)CSCC(C(O)=O)NC2=O)=O)CC(N)=O)=O)=O)CS5)=O)CC(O)=O)=O)CC(O)=O)=O)C3C)=O)C(CC)C)=O)C5C)=O)C)=O)NC(C(NC(CNC(C(NC(CNC(C(NC(C(CCCCN)N)=O)CCCNC(N)=N)=O)=O)CO)=O)=O)CC6=CNc7c6cccc7)=O)C
AGKN01	ORAL	Streptococcus mutans TCI-138	[u'RIBOSOMAL']	[u'CLASS_II_BACTERIOCIN']	2	69_Antimicrobial protein BL-A60	0.545455		MNTRMMEQFETMDAETLSHVTGGGLYDGANGYAYRDSQGHWAYKVTKTPAQALTDVVVNSWASGAASFAAYA
LAUB02	RESPIRATORY	Burkholderia pseudomallei	[u'RIBOSOMAL']	[u'LASSO_PEPTIDE']	8	561_["CAPISTRUIN"]	0.75	O[C@H](C)[C@@H](C(N1CCC[C@H]1C(NCC(N[C@@H](CC2=CC=CC=C2)C(N[C@H](C(N[C@H](C(N3CCC[C@H]3C(N[C@@H](C4)C(N[C@@H](C)C(N[C@H](C(N[C@H](C(N[C@@H]([C@H](CC)C)C(N[C@H](C(N[C@H](C(N[C@@H](CC5=CC=CC=C5)C(NCC(N[C@@H](CC6=CC=CC=C6)C(N[C@H](C(O)=O)CC(N)=O)=O)=O)=O)=O)CCCNC(N)=N)=O)CO)=O)=O)C(C)C)=O)CCCNC(N)=N)=O)=O)=O)=O)[C@@H](C)O)=O)CCC(N)=O)=O)=O)=O)=O)NC(CNC4=O)=O
CEBH01	CSF	Streptococcus suis	[u'RIBOSOMAL']	[u'CLASS_II_LANTIPEPTIDE']	2	88_["A-3802-VI-7"]	0.678571	O=C(O)CCC4NC(=O)C(NC(=O)C6NC(=O)C(NC(=O)C(NC(=O)C1NC(=O)C(NC(=O)C(NC(=O)CNC(=O)C(NC(=O)C(NC(=O)C)CSC1)CO)Cc3c[nH]c2ccccc23)C(C)C)C(C)SCC(NC4(=O))C(=O)NCC(=O)NC5C(=O)NC(C(=O)NC(C(=O)NC(C(=O)NC(C(=O)NC(C(=O)OC)CS(=O)C5(C))C)CSC6(C))C(C)CC)C(C)C)CC(C)C)C(C)CC
ALYY01	ORAL	Streptococcus mutans B04Sm5	[u'RIBOSOMAL']	[u'CLASS_II_LANTIPEPTIDE']	4	127_["VARIACIN"]	0.688889	CCC(C(C(NC(C(NC(C(NC(C(NC(C(NC(C(NC(C(NC(C(NC(C(NC(C(NC(C(NC(C(NC(C(NC(C(N/C1=C/C)=O)Cc2ccccc2)=O)C(C)C)=O)Cc3ccccc3)=O)CCC(N)=O)=O)Cc4ccccc4)=O)CSCC(C(NC(C(O)=O)=C)=O)NC5=O)=O)CC(N)=O)=O)CCSC)=O)Cc6nc[nH]c6)=O)CS7)=O)CCC(O)=O)=O)Cc8nc[nH]c8)=O)CSCC5NC1=O)=O)NC(C(C7C)NC(C9CCCN9C(C(C(CC)C)NC(C(C(C)C)NC(CNC(C(NC(CN)=O)=C)=O)=O)=O)=O)=O)=O)C
JSMT01	URINE	Escherichia coli	[u'RIBOSOMAL']	[u'LINEAR_AZOLE_CONTAINING_PEPTIDE']	5	601_["MccB17","MICROCIN B17","MICROCIN 17W"]	1	O=C(O)C(N=C(O)C(N=C(O)C(N=C(O)CN=C(O)c1nc(oc1)CN=C(O)CN=C(O)c2nc(oc2)CN=C(O)CN=C(O)C(N=C(O)CN=C(O)CN=C(O)c3nc(oc3)c8nc(CN=C(O)C(N=C(O)C(N=C(O)c7nc(CN=C(O)CN=C(O)c6nc(CN=C(O)CN=C(O)CN=C(O)C(N=C(O)CN=C(O)CN=C(O)c5nc(c4nc(oc4)CN=C(O)CN=C(O)CN=C(O)CN=C(O)CN=C(O)CN=C(O)CN=C(O)CN=C(O)CN=C(O)CN=C(O)C(N=C(O)CN=C(O)C(N)C(C)C)C(C)CC)sc5)CCC(=N)O)sc6)sc7)CO)CC(=N)O)sc8)CC(=N)O)CO)Cc9cnc[nH]9)C(C)CC
CDSP01	CSF	Streptococcus suis	[u'RIBOSOMAL']	[u'CLASS_II_LANTIPEPTIDE']	2	88_["A-3802-VI-7"]	0.678571	O=C(O)CCC4NC(=O)C(NC(=O)C6NC(=O)C(NC(=O)C(NC(=O)C1NC(=O)C(NC(=O)C(NC(=O)CNC(=O)C(NC(=O)C(NC(=O)C)CSC1)CO)Cc3c[nH]c2ccccc23)C(C)C)C(C)SCC(NC4(=O))C(=O)NCC(=O)NC5C(=O)NC(C(=O)NC(C(=O)NC(C(=O)NC(C(=O)NC(C(=O)OC)CS(=O)C5(C))C)CSC6(C))C(C)CC)C(C)C)CC(C)C)C(C)CC
LFVM01	SKIN	Staphylococcus aureus subsp. aureus	[u'RIBOSOMAL']	[u'CLASS_I_LANTIPEPTIDE']	4	105_["Lanthionine containing peptide","HYICIN M51"]	0.952381	O=C(N)CC5NC(=O)C(NC(=O)C(NC(=O)CNC(=O)C(=CC)NC(=O)C(NC(=O)C(NC(=O)C3NC(=O)CNC(=O)C4N(C(=O)C(NC(=O)C1NC(=O)C(NC(=O)C(=C)NC(=O)C(NC(=O)C(NC(=O)C(=CC)NC(=O)C(N)C(C)CC)CSC1)Cc2ccccc2)CC(C)C)C(C)SC3)CCC4)C)CCCCN)CSCC6NC(=O)C(NC(=O)C(NC5(=O))CSC=CNC6(=O))Cc7ccc(O)cc7)Cc8ccccc8
LFVO01	SKIN	Staphylococcus aureus subsp. aureus	[u'RIBOSOMAL']	[u'CLASS_I_LANTIPEPTIDE']	4	105_["Lanthionine containing peptide","HYICIN M51"]	0.952381	O=C(N)CC5NC(=O)C(NC(=O)C(NC(=O)CNC(=O)C(=CC)NC(=O)C(NC(=O)C(NC(=O)C3NC(=O)CNC(=O)C4N(C(=O)C(NC(=O)C1NC(=O)C(NC(=O)C(=C)NC(=O)C(NC(=O)C(NC(=O)C(=CC)NC(=O)C(N)C(C)CC)CSC1)Cc2ccccc2)CC(C)C)C(C)SC3)CCC4)C)CCCCN)CSCC6NC(=O)C(NC(=O)C(NC5(=O))CSC=CNC6(=O))Cc7ccc(O)cc7)Cc8ccccc8
LNLO01	STOOL	Enterococcus faecium	[u'RIBOSOMAL']	[u'CLASS_II_BACTERIOCIN']	1	16_Bacteriocin T8	1		MKKKVLKHCVILGILGTCLAGIGTGIKVDAATYYGNGLYCNKEKCWVDWNQAKGEIGKIIVNGWVNHGPWAPRR
LNLO01	STOOL	Enterococcus faecium	[u'RIBOSOMAL']	[u'CLASS_II_BACTERIOCIN']	3	40_Enterocin A	1		MKHLKILSIKETQLIYGGTTHSGKYYGNGVYCTKNKCTVDWAKATTCIAGMSIGGFLGGAIPGKC
LNLR01	STOOL	Enterococcus faecium	[u'RIBOSOMAL']	[u'CLASS_II_BACTERIOCIN']	1	16_Bacteriocin T8	1		MKKKVLKHCVILGILGTCLAGIGTGIKVDAATYYGNGLYCNKEKCWVDWNQAKGEIGKIIVNGWVNHGPWAPRR
LNLR01	STOOL	Enterococcus faecium	[u'RIBOSOMAL']	[u'CLASS_II_BACTERIOCIN']	3	40_Enterocin A	1		MKHLKILSIKETQLIYGGTTHSGKYYGNGVYCTKNKCTVDWAKATTCIAGMSIGGFLGGAIPGKC
CDXC01	CSF	Streptococcus suis	[u'RIBOSOMAL']	[u'CLASS_II_LANTIPEPTIDE']	2	88_["A-3802-VI-7"]	0.678571	O=C(O)CCC4NC(=O)C(NC(=O)C6NC(=O)C(NC(=O)C(NC(=O)C1NC(=O)C(NC(=O)C(NC(=O)CNC(=O)C(NC(=O)C(NC(=O)C)CSC1)CO)Cc3c[nH]c2ccccc23)C(C)C)C(C)SCC(NC4(=O))C(=O)NCC(=O)NC5C(=O)NC(C(=O)NC(C(=O)NC(C(=O)NC(C(=O)NC(C(=O)OC)CS(=O)C5(C))C)CSC6(C))C(C)CC)C(C)C)CC(C)C)C(C)CC
LFVA01	SKIN	Staphylococcus aureus subsp. aureus	[u'RIBOSOMAL']	[u'CLASS_I_LANTIPEPTIDE']	4	105_["Lanthionine containing peptide","HYICIN M51"]	0.952381	O=C(N)CC5NC(=O)C(NC(=O)C(NC(=O)CNC(=O)C(=CC)NC(=O)C(NC(=O)C(NC(=O)C3NC(=O)CNC(=O)C4N(C(=O)C(NC(=O)C1NC(=O)C(NC(=O)C(=C)NC(=O)C(NC(=O)C(NC(=O)C(=CC)NC(=O)C(N)C(C)CC)CSC1)Cc2ccccc2)CC(C)C)C(C)SC3)CCC4)C)CCCCN)CSCC6NC(=O)C(NC(=O)C(NC5(=O))CSC=CNC6(=O))Cc7ccc(O)cc7)Cc8ccccc8
AHSK01	ORAL	Streptococcus mutans M2A	[u'RIBOSOMAL']	[u'CLASS_II_LANTIPEPTIDE']	4	127_["VARIACIN"]	0.688889	CCC(C(C(NC(C(NC(C(NC(C(NC(C(NC(C(NC(C(NC(C(NC(C(NC(C(NC(C(NC(C(NC(C(NC(C(N/C1=C/C)=O)Cc2ccccc2)=O)C(C)C)=O)Cc3ccccc3)=O)CCC(N)=O)=O)Cc4ccccc4)=O)CSCC(C(NC(C(O)=O)=C)=O)NC5=O)=O)CC(N)=O)=O)CCSC)=O)Cc6nc[nH]c6)=O)CS7)=O)CCC(O)=O)=O)Cc8nc[nH]c8)=O)CSCC5NC1=O)=O)NC(C(C7C)NC(C9CCCN9C(C(C(CC)C)NC(C(C(C)C)NC(CNC(C(NC(CN)=O)=C)=O)=O)=O)=O)=O)=O)C
AHSK01	ORAL	Streptococcus mutans M2A	[u'RIBOSOMAL']	[u'CLASS_II_BACTERIOCIN']	7	69_Antimicrobial protein BL-A60	0.545455		MLVDILTIKKGGIHMNTRMMEQFETMDAETLSHVTGGGLYDGANGYAYRDSQGHWAYKVTKTPAQALTDVVVNSWASGAASFAAYA
AGMM01	ORAL	Streptococcus mutans TCI-298	[u'RIBOSOMAL']	[u'CLASS_II_BACTERIOCIN']	2	69_Antimicrobial protein BL-A60	0.545455		MNTRMMEQFETMDAETLSHVTGGGLYDGANGYAYRDSQGHWAYKVTKTPAQALTDVVVNSWASGAASFAAYA
AWPE01	ORAL	Streptococcus pyogenes SP7-LAU	[u'RIBOSOMAL']	[u'CLASS_II_LANTIPEPTIDE']	3	121_["SALIVARICIN A"]	0.9375	CCC(C(C(NC(C(NC(C(NC(C(NC(C(NC(C(NC(C(NC(C(N1CCCC1C(NC(C(NC(C(NC(C(NC(C(NC(C(NC2CS3)=O)C(C)C)=O)Cc4ccccc4)=O)C(C)C)=O)CSCC(C(O)=O)NC2=O)=O)CC(N)=O)=O)=O)CS5)=O)CC(O)=O)=O)CC(O)=O)=O)C3C)=O)C(CC)C)=O)C5C)=O)C)=O)NC(C(NC(CNC(C(NC(CNC(C(NC(C(CCCCN)N)=O)CCCNC(N)=N)=O)=O)CO)=O)=O)CC6=CNc7c6cccc7)=O)C
AWPE01	ORAL	Streptococcus pyogenes SP7-LAU	[u'RIBOSOMAL']	[u'LINEAR_AZOLE_CONTAINING_PEPTIDE']	4	600_["PLANTAZOLICIN B"]	0.789474	O=C(O)C(N=C(O)C1N=C(OC1(C))c2nc(oc2)c3nc(oc3)c4nc(oc4)c5nc(oc5)C(N=C(O)C(N=C(O)c6nc(oc6C)c7nc(oc7C)c%10nc(c8nc(oc8C)c9nc(C(N)CCCNC(=N)N)sc9)sc%10)C(C)CC)C(C)CC)Cc%11ccccc%11
LTMY01	SKIN	Staphylococcus sp. HMSC34D01	[u'RIBOSOMAL']	[u'CLASS_I_LANTIPEPTIDE']	3	105_["Lanthionine containing peptide","HYICIN M51"]	0.952381	O=C(N)CC5NC(=O)C(NC(=O)C(NC(=O)CNC(=O)C(=CC)NC(=O)C(NC(=O)C(NC(=O)C3NC(=O)CNC(=O)C4N(C(=O)C(NC(=O)C1NC(=O)C(NC(=O)C(=C)NC(=O)C(NC(=O)C(NC(=O)C(=CC)NC(=O)C(N)C(C)CC)CSC1)Cc2ccccc2)CC(C)C)C(C)SC3)CCC4)C)CCCCN)CSCC6NC(=O)C(NC(=O)C(NC5(=O))CSC=CNC6(=O))Cc7ccc(O)cc7)Cc8ccccc8
LSST01	STOOL	Lactobacillus plantarum	[u'RIBOSOMAL']	[u'CLASS_II_BACTERIOCIN']	3	54_Plantaricin F	1		MLQFDKLQYSRLPQKKLAKISGGFNRGGYNFGKSVRHVVDAIGSVAGIRGILKSIR
LSST01	STOOL	Lactobacillus plantarum	[u'RIBOSOMAL']	[u'CLASS_I_LANTIPEPTIDE']	4	113_["MUTACIN 1140","MUTICIN 1140"]	0.904762	O=C(NC(C(=O)NC7C(=O)NC(C(=O)NC(C(=O)NC(=CC)C(=O)N6CCCC6(C(=O)NCC(=O)NC5C(=O)NC(C(=O)NC(C(=O)NC(C(=O)NCC(=O)NC2C(=O)NC(C(=O)NC(C(=O)NC1C(=O)NC(C(=O)NC(C(=O)NC=CSC1)CSC2)Cc3ccc(O)cc3)CC(=O)N)Cc4ccccc4)C(C)SC5)CCCNC(=N)N)C))CSC7)CC(C)C)Cc9c[nH]c8ccccc89)C(=C)NC(=O)C(NC(=O)C(N)Cc%10ccccc%10)CCCCN
JPVS01	RESPIRATORY	Rothia dentocariosa	[u'RIBOSOMAL']	[u'CLASS_II_LANTIPEPTIDE', u'LASSO_PEPTIDE']	3	569_["XANTHOMONIN II"]	0.684211	CC(C)C[C@@H](C(N[C@@H](C)C(NCC(N[C@H](C(N[C@H](C(N[C@@H](CCSC)C(NCC(NCC(N[C@@H]([C@H](CC)C)C(N[C@H](C(N[C@H](C(O)=O)[C@@H](C)O)=O)[C@@H](C)O)=O)=O)=O)=O)=O)CCC(O)=O)=O)CC1)=O)=O)=O)NC([C@@H]2CCCN2C(CNC(CNC1=O)=O)=O)=O
AGKO01	ORAL	Streptococcus mutans TCI-143	[u'RIBOSOMAL']	[u'CLASS_II_BACTERIOCIN']	2	69_Antimicrobial protein BL-A60	0.545455		MLVDILTIKKGGIHMNTRMMEQFETMDAETLSHVTGGGLYDGANGYAYRDSQGHWAYKVTKTPAQALTDVVVNSWASGAASFAAYA
BCYM01	STOOL	Bifidobacterium longum subsp. longum	[u'RIBOSOMAL']	[u'CLASS_II_LANTIPEPTIDE']	1	199_Microbisporicin B	0.727273	NC(C(N/C(C(NC(C(NC(C(C)C)C(NC(C(NC1CC(C)C)=O)=C)=O)=O)CSCC(C(NC2C(NC(C(NC(CC3=CC=CC=C3)C(NC(CSC2C)C(NC(C(NC4C(NC(C(NCC(NCC(NCC(NC5C(NC(C(NC(CSC4)C(NC6C(NC(CC7=CC=CC=C7)C(NC(CSC5)C(N/C=C\SC6)=O)=O)=O)=O)=O)CC8=CC=CC=C8)=O)=O)=O)=O)=O)CCC(N)=O)=O)=O)C(C)O)=O)=O)=O)C)=O)=O)NC1=O)=O)=C\C)=O)C(C)CC
AGLP01	ORAL	Streptococcus mutans TCI-220	[u'RIBOSOMAL']	[u'CLASS_II_BACTERIOCIN']	2	69_Antimicrobial protein BL-A60	0.545455		MLVDILTIKKGGIHMNTRMMEQFETMDAETLSHVTGGGLYDGANGYAYRDSQGHWAYKVTKTPAQALTDVVVNSWASGAASFAAYA
JXZZ01	RESPIRATORY	Staphylococcus aureus	[u'RIBOSOMAL']	[u'BACTERIAL_HEAD_TO_TAIL_CYCLIZED']	2	569_["XANTHOMONIN II"]	0.578947	CC(C)C[C@@H](C(N[C@@H](C)C(NCC(N[C@H](C(N[C@H](C(N[C@@H](CCSC)C(NCC(NCC(N[C@@H]([C@H](CC)C)C(N[C@H](C(N[C@H](C(O)=O)[C@@H](C)O)=O)[C@@H](C)O)=O)=O)=O)=O)=O)CCC(O)=O)=O)CC1)=O)=O)=O)NC([C@@H]2CCCN2C(CNC(CNC1=O)=O)=O)=O
AGME01	ORAL	Streptococcus mutans TCI-267	[u'RIBOSOMAL']	[u'CLASS_II_BACTERIOCIN']	2	69_Antimicrobial protein BL-A60	0.545455		MLVDILTIKKGGIHMNTRMMEQFETMDAETLSHVTGGGLYDGANGYAYRDSQGHWAYKVTKTPAQALTDVVVNSWASGAASFAAYA
LTMD01	SKIN	Staphylococcus sp. HMSC64F10	[u'RIBOSOMAL']	[u'CLASS_I_LANTIPEPTIDE']	1	105_["Lanthionine containing peptide","HYICIN M51"]	0.952381	O=C(N)CC5NC(=O)C(NC(=O)C(NC(=O)CNC(=O)C(=CC)NC(=O)C(NC(=O)C(NC(=O)C3NC(=O)CNC(=O)C4N(C(=O)C(NC(=O)C1NC(=O)C(NC(=O)C(=C)NC(=O)C(NC(=O)C(NC(=O)C(=CC)NC(=O)C(N)C(C)CC)CSC1)Cc2ccccc2)CC(C)C)C(C)SC3)CCC4)C)CCCCN)CSCC6NC(=O)C(NC(=O)C(NC5(=O))CSC=CNC6(=O))Cc7ccc(O)cc7)Cc8ccccc8
AGLF01	ORAL	Streptococcus mutans TCI-187	[u'RIBOSOMAL']	[u'CLASS_II_BACTERIOCIN']	3	69_Antimicrobial protein BL-A60	0.545455		MLVDILTIKKGGIHMNTRMMEQFETMDAETLSHVTGGGLYDGANGYAYRDSQGHWAYKVTKTPAQALTDVVVNSWASGAASFAAYA
AGLY01	ORAL	Streptococcus mutans TCI-243	[u'RIBOSOMAL']	[u'CLASS_II_BACTERIOCIN']	2	69_Antimicrobial protein BL-A60	0.545455		MNTRMMEQFETMDAETLSHVTGGGLYDGANGYAYRDSQGHWAYKVTKTPAQALTDVVVNSWASGAASFAAYA
LNFU01	STOOL	Escherichia coli	[u'RIBOSOMAL']	[u'LINEAR_AZOLE_CONTAINING_PEPTIDE']	5	601_["MccB17","MICROCIN B17","MICROCIN 17W"]	1	O=C(O)C(N=C(O)C(N=C(O)C(N=C(O)CN=C(O)c1nc(oc1)CN=C(O)CN=C(O)c2nc(oc2)CN=C(O)CN=C(O)C(N=C(O)CN=C(O)CN=C(O)c3nc(oc3)c8nc(CN=C(O)C(N=C(O)C(N=C(O)c7nc(CN=C(O)CN=C(O)c6nc(CN=C(O)CN=C(O)CN=C(O)C(N=C(O)CN=C(O)CN=C(O)c5nc(c4nc(oc4)CN=C(O)CN=C(O)CN=C(O)CN=C(O)CN=C(O)CN=C(O)CN=C(O)CN=C(O)CN=C(O)CN=C(O)C(N=C(O)CN=C(O)C(N)C(C)C)C(C)CC)sc5)CCC(=N)O)sc6)sc7)CO)CC(=N)O)sc8)CC(=N)O)CO)Cc9cnc[nH]9)C(C)CC
JMMV01	RESPIRATORY	Burkholderia pseudomallei MSHR5855	[u'RIBOSOMAL']	[u'LASSO_PEPTIDE']	17	561_["CAPISTRUIN"]	0.875	O[C@H](C)[C@@H](C(N1CCC[C@H]1C(NCC(N[C@@H](CC2=CC=CC=C2)C(N[C@H](C(N[C@H](C(N3CCC[C@H]3C(N[C@@H](C4)C(N[C@@H](C)C(N[C@H](C(N[C@H](C(N[C@@H]([C@H](CC)C)C(N[C@H](C(N[C@H](C(N[C@@H](CC5=CC=CC=C5)C(NCC(N[C@@H](CC6=CC=CC=C6)C(N[C@H](C(O)=O)CC(N)=O)=O)=O)=O)=O)CCCNC(N)=N)=O)CO)=O)=O)C(C)C)=O)CCCNC(N)=N)=O)=O)=O)=O)[C@@H](C)O)=O)CCC(N)=O)=O)=O)=O)=O)NC(CNC4=O)=O
LTTK01	RESPIRATORY	Enterococcus sp. HMSC076D08	[u'RIBOSOMAL']	[u'CLASS_II_BACTERIOCIN']	2	40_Enterocin A	1		MKHLKILSIKETQLIYGGTTHSGKYYGNGVYCTKNKCTVDWAKATTCIAGMSIGGFLGGAIPGKC
JXAX01	GI	Lactobacillus plantarum	[u'RIBOSOMAL']	[u'CLASS_II_BACTERIOCIN']	3	54_Plantaricin F	1		MKIKLTVLNEFEELTADAEKNISGGRRSRKNGIGYAIGYAFGAVERAVLGGSRDYNK
ALYP01	ORAL	Streptococcus mutans B13Sm1	[u'RIBOSOMAL']	[u'CLASS_II_BACTERIOCIN']	4	69_Antimicrobial protein BL-A60	0.545455		MLVDILTIKKGGIHMNTKMMEQFETMDAETLSHVTGGGLYDGANGYAYRDSQGHWAYKVTKTPAQALTDVVVNSWASGAASFAAYA
LVYS01	ORAL	Streptococcus pyogenes	[u'RIBOSOMAL']	[u'LINEAR_AZOLE_CONTAINING_PEPTIDE']	1	600_["PLANTAZOLICIN B"]	0.789474	O=C(O)C(N=C(O)C1N=C(OC1(C))c2nc(oc2)c3nc(oc3)c4nc(oc4)c5nc(oc5)C(N=C(O)C(N=C(O)c6nc(oc6C)c7nc(oc7C)c%10nc(c8nc(oc8C)c9nc(C(N)CCCNC(=N)N)sc9)sc%10)C(C)CC)C(C)CC)Cc%11ccccc%11
LVYS01	ORAL	Streptococcus pyogenes	[u'RIBOSOMAL']	[u'CLASS_I_LANTIPEPTIDE']	2	124_["STREPTIN"]	1	CC(CC1NC(C(NC(C(NC(C(NC(CNC(C(C(C)C)N)=O)=O)CSCC(C(NC(C(N2CCCC2C(NCC(NC(C(NC(C(NC(C(NC(C(NC(C(NC3C(C)C)=O)CC(C)C)=O)CCCCN)=O)CC4=CNc5c4cccc5)=O)CS6)=O)CSCC(C(NC(C(N/C(C(N/C(C(N/C(C(NC(C(NC(C(O)=O)CCCCN)=O)C(C)C)=O)=C/C)=O)=C/C)=O)=C/C)=O)Cc7ccccc7)=O)NC3=O)=O)=O)=O)C6C)=O)NC1=O)=O)CCCNC(N)=N)=O)Cc8ccc(O)cc8)=O)C
LVYS01	ORAL	Streptococcus pyogenes	[u'RIBOSOMAL']	[u'CLASS_II_LANTIPEPTIDE']	4	121_["SALIVARICIN A"]	0.9375	CCC(C(C(NC(C(NC(C(NC(C(NC(C(NC(C(NC(C(NC(C(N1CCCC1C(NC(C(NC(C(NC(C(NC(C(NC(C(NC2CS3)=O)C(C)C)=O)Cc4ccccc4)=O)C(C)C)=O)CSCC(C(O)=O)NC2=O)=O)CC(N)=O)=O)=O)CS5)=O)CC(O)=O)=O)CC(O)=O)=O)C3C)=O)C(CC)C)=O)C5C)=O)C)=O)NC(C(NC(CNC(C(NC(CNC(C(NC(C(CCCCN)N)=O)CCCNC(N)=N)=O)=O)CO)=O)=O)CC6=CNc7c6cccc7)=O)C
JSJV01	URINE	Escherichia coli	[u'RIBOSOMAL']	[u'CLASS_III_BACTERIOCIN']	2	69_Antimicrobial protein BL-A60	0.545455		MNMPGFNYGGYGDGTGWSSESGGPAPGGGMHGNSGGQRGDNANSSNSVSQQISAIQNDQKLKQKVVNMLIAARKMNPEAKMILGSIAPSGVMQVTIEGITSTQAKQLGLGGLVMGYNASGVIGAVGEIDTGHRLNASGASTPGSETSVESFVNGQKPAGEWHAVAKDSWTGAGPVNVGLVNNAIKSVRIIKKGYVTGVLLPEEVMNKAEYKAMRQAFDSLPLAKQGEAVRQIVAAWSLAYQDFPVNLKKDMGRVTERVVDAVNLALILNQISSGMSASQKDVDAANRIINETVKAINDVNLKIAEKKKQQVPLLSLMKQKQKEVEELKKVFKNHSYHRIRDAQRAYDDARNKNDLLVSDINALQAQVSGLTARKQQAEKNKAAAEKAKADAKAKAEAEK
LGAC01	ORAL	Streptococcus mutans	[u'RIBOSOMAL']	[u'CLASS_II_BACTERIOCIN']	3	69_Antimicrobial protein BL-A60	0.545455		MNTKMVEQFETMDAETLSHVTGGGLYDGANGYAYRDSQGHWAYKVTKTPAQALTDVVVNSWASGAASFAAYA
CEAV01	CSF	Streptococcus suis	[u'RIBOSOMAL']	[u'CLASS_II_LANTIPEPTIDE']	1	88_["A-3802-VI-7"]	0.678571	O=C(O)CCC4NC(=O)C(NC(=O)C6NC(=O)C(NC(=O)C(NC(=O)C1NC(=O)C(NC(=O)C(NC(=O)CNC(=O)C(NC(=O)C(NC(=O)C)CSC1)CO)Cc3c[nH]c2ccccc23)C(C)C)C(C)SCC(NC4(=O))C(=O)NCC(=O)NC5C(=O)NC(C(=O)NC(C(=O)NC(C(=O)NC(C(=O)NC(C(=O)OC)CS(=O)C5(C))C)CSC6(C))C(C)CC)C(C)C)CC(C)C)C(C)CC
CDTC01	CSF	Streptococcus suis	[u'RIBOSOMAL']	[u'CLASS_II_LANTIPEPTIDE']	1	88_["A-3802-VI-7"]	0.678571	O=C(O)CCC4NC(=O)C(NC(=O)C6NC(=O)C(NC(=O)C(NC(=O)C1NC(=O)C(NC(=O)C(NC(=O)CNC(=O)C(NC(=O)C(NC(=O)C)CSC1)CO)Cc3c[nH]c2ccccc23)C(C)C)C(C)SCC(NC4(=O))C(=O)NCC(=O)NC5C(=O)NC(C(=O)NC(C(=O)NC(C(=O)NC(C(=O)NC(C(=O)OC)CS(=O)C5(C))C)CSC6(C))C(C)CC)C(C)C)CC(C)C)C(C)CC
LFUX01	SKIN	Staphylococcus aureus subsp. aureus	[u'RIBOSOMAL']	[u'CLASS_I_LANTIPEPTIDE']	4	105_["Lanthionine containing peptide","HYICIN M51"]	0.952381	O=C(N)CC5NC(=O)C(NC(=O)C(NC(=O)CNC(=O)C(=CC)NC(=O)C(NC(=O)C(NC(=O)C3NC(=O)CNC(=O)C4N(C(=O)C(NC(=O)C1NC(=O)C(NC(=O)C(=C)NC(=O)C(NC(=O)C(NC(=O)C(=CC)NC(=O)C(N)C(C)CC)CSC1)Cc2ccccc2)CC(C)C)C(C)SC3)CCC4)C)CCCCN)CSCC6NC(=O)C(NC(=O)C(NC5(=O))CSC=CNC6(=O))Cc7ccc(O)cc7)Cc8ccccc8
JYAO01	RESPIRATORY	Staphylococcus aureus	[u'RIBOSOMAL']	[u'BACTERIAL_HEAD_TO_TAIL_CYCLIZED']	2	569_["XANTHOMONIN II"]	0.578947	CC(C)C[C@@H](C(N[C@@H](C)C(NCC(N[C@H](C(N[C@H](C(N[C@@H](CCSC)C(NCC(NCC(N[C@@H]([C@H](CC)C)C(N[C@H](C(N[C@H](C(O)=O)[C@@H](C)O)=O)[C@@H](C)O)=O)=O)=O)=O)=O)CCC(O)=O)=O)CC1)=O)=O)=O)NC([C@@H]2CCCN2C(CNC(CNC1=O)=O)=O)=O
LTPK01	RESPIRATORY	Streptococcus sp. HMSC065H07	[u'RIBOSOMAL']	[u'CLASS_I_LANTIPEPTIDE']	2	124_["STREPTIN"]	1	CC(CC1NC(C(NC(C(NC(C(NC(CNC(C(C(C)C)N)=O)=O)CSCC(C(NC(C(N2CCCC2C(NCC(NC(C(NC(C(NC(C(NC(C(NC(C(NC3C(C)C)=O)CC(C)C)=O)CCCCN)=O)CC4=CNc5c4cccc5)=O)CS6)=O)CSCC(C(NC(C(N/C(C(N/C(C(N/C(C(NC(C(NC(C(O)=O)CCCCN)=O)C(C)C)=O)=C/C)=O)=C/C)=O)=C/C)=O)Cc7ccccc7)=O)NC3=O)=O)=O)=O)C6C)=O)NC1=O)=O)CCCNC(N)=N)=O)Cc8ccc(O)cc8)=O)C
LTPK01	RESPIRATORY	Streptococcus sp. HMSC065H07	[u'RIBOSOMAL']	[u'CLASS_II_LANTIPEPTIDE']	3	129_["streptococcin A-M49"]	0.956522	CCC(C(C(NC(C(NC(C(NC(C(NC(C(NC(C(NC(C(NC(C(NC1C(NC(C(NC(C(NC(C(NC(C(NC(C(N/C2=C\C)=O)C)=O)CC(C)C)=O)Cc3ccccc3)=O)C)=O)CC4=CNc5c4cccc5)=O)=O)CC(N)=O)=O)CC(C)C)=O)Cc6nc[nH]c6)=O)CS7)=O)CCC(O)=O)=O)Cc8nc[nH]c8)=O)CSCC(C(NC(C(NC(C(O)=O)=C)=O)CSC1C)=O)NC2=O)=O)NC(C(C7C)NC(C(NC(C(NC(C(C(C)C)NC(CNC(C(NC(C(NC(CN)=O)CCCCN)=O)CC(N)=O)=O)=O)=O)Cc9ccccc9)=O)CCCCN)=O)=O)C
LTPK01	RESPIRATORY	Streptococcus sp. HMSC065H07	[u'RIBOSOMAL']	[u'CLASS_II_LANTIPEPTIDE']	4	121_["SALIVARICIN A"]	0.9375	CCC(C(C(NC(C(NC(C(NC(C(NC(C(NC(C(NC(C(NC(C(N1CCCC1C(NC(C(NC(C(NC(C(NC(C(NC(C(NC2CS3)=O)C(C)C)=O)Cc4ccccc4)=O)C(C)C)=O)CSCC(C(O)=O)NC2=O)=O)CC(N)=O)=O)=O)CS5)=O)CC(O)=O)=O)CC(O)=O)=O)C3C)=O)C(CC)C)=O)C5C)=O)C)=O)NC(C(NC(CNC(C(NC(CNC(C(NC(C(CCCCN)N)=O)CCCNC(N)=N)=O)=O)CO)=O)=O)CC6=CNc7c6cccc7)=O)C
ATJY01	RESPIRATORY	Burkholderia pseudomallei MSHR338	[u'RIBOSOMAL']	[u'LASSO_PEPTIDE']	1	561_["CAPISTRUIN"]	0.875	O[C@H](C)[C@@H](C(N1CCC[C@H]1C(NCC(N[C@@H](CC2=CC=CC=C2)C(N[C@H](C(N[C@H](C(N3CCC[C@H]3C(N[C@@H](C4)C(N[C@@H](C)C(N[C@H](C(N[C@H](C(N[C@@H]([C@H](CC)C)C(N[C@H](C(N[C@H](C(N[C@@H](CC5=CC=CC=C5)C(NCC(N[C@@H](CC6=CC=CC=C6)C(N[C@H](C(O)=O)CC(N)=O)=O)=O)=O)=O)CCCNC(N)=N)=O)CO)=O)=O)C(C)C)=O)CCCNC(N)=N)=O)=O)=O)=O)[C@@H](C)O)=O)CCC(N)=O)=O)=O)=O)=O)NC(CNC4=O)=O
CDTT01	CSF	Streptococcus suis	[u'RIBOSOMAL']	[u'CLASS_II_LANTIPEPTIDE']	1	88_["A-3802-VI-7"]	0.678571	O=C(O)CCC4NC(=O)C(NC(=O)C6NC(=O)C(NC(=O)C(NC(=O)C1NC(=O)C(NC(=O)C(NC(=O)CNC(=O)C(NC(=O)C(NC(=O)C)CSC1)CO)Cc3c[nH]c2ccccc23)C(C)C)C(C)SCC(NC4(=O))C(=O)NCC(=O)NC5C(=O)NC(C(=O)NC(C(=O)NC(C(=O)NC(C(=O)NC(C(=O)OC)CS(=O)C5(C))C)CSC6(C))C(C)CC)C(C)C)CC(C)C)C(C)CC
LASE01	STOOL	Escherichia coli	[u'RIBOSOMAL']	[u'LINEAR_AZOLE_CONTAINING_PEPTIDE']	5	601_["MccB17","MICROCIN B17","MICROCIN 17W"]	1	O=C(O)C(N=C(O)C(N=C(O)C(N=C(O)CN=C(O)c1nc(oc1)CN=C(O)CN=C(O)c2nc(oc2)CN=C(O)CN=C(O)C(N=C(O)CN=C(O)CN=C(O)c3nc(oc3)c8nc(CN=C(O)C(N=C(O)C(N=C(O)c7nc(CN=C(O)CN=C(O)c6nc(CN=C(O)CN=C(O)CN=C(O)C(N=C(O)CN=C(O)CN=C(O)c5nc(c4nc(oc4)CN=C(O)CN=C(O)CN=C(O)CN=C(O)CN=C(O)CN=C(O)CN=C(O)CN=C(O)CN=C(O)CN=C(O)C(N=C(O)CN=C(O)C(N)C(C)C)C(C)CC)sc5)CCC(=N)O)sc6)sc7)CO)CC(=N)O)sc8)CC(=N)O)CO)Cc9cnc[nH]9)C(C)CC
JWKA01	GI	Escherichia coli	[u'RIBOSOMAL']	[u'LINEAR_AZOLE_CONTAINING_PEPTIDE']	4	601_["MccB17","MICROCIN B17","MICROCIN 17W"]	1	O=C(O)C(N=C(O)C(N=C(O)C(N=C(O)CN=C(O)c1nc(oc1)CN=C(O)CN=C(O)c2nc(oc2)CN=C(O)CN=C(O)C(N=C(O)CN=C(O)CN=C(O)c3nc(oc3)c8nc(CN=C(O)C(N=C(O)C(N=C(O)c7nc(CN=C(O)CN=C(O)c6nc(CN=C(O)CN=C(O)CN=C(O)C(N=C(O)CN=C(O)CN=C(O)c5nc(c4nc(oc4)CN=C(O)CN=C(O)CN=C(O)CN=C(O)CN=C(O)CN=C(O)CN=C(O)CN=C(O)CN=C(O)CN=C(O)C(N=C(O)CN=C(O)C(N)C(C)C)C(C)CC)sc5)CCC(=N)O)sc6)sc7)CO)CC(=N)O)sc8)CC(=N)O)CO)Cc9cnc[nH]9)C(C)CC
CDVY01	CSF	Streptococcus suis	[u'RIBOSOMAL']	[u'CLASS_II_LANTIPEPTIDE']	1	88_["A-3802-VI-7"]	0.678571	O=C(O)CCC4NC(=O)C(NC(=O)C6NC(=O)C(NC(=O)C(NC(=O)C1NC(=O)C(NC(=O)C(NC(=O)CNC(=O)C(NC(=O)C(NC(=O)C)CSC1)CO)Cc3c[nH]c2ccccc23)C(C)C)C(C)SCC(NC4(=O))C(=O)NCC(=O)NC5C(=O)NC(C(=O)NC(C(=O)NC(C(=O)NC(C(=O)NC(C(=O)OC)CS(=O)C5(C))C)CSC6(C))C(C)CC)C(C)C)CC(C)C)C(C)CC
AGLW01	ORAL	Streptococcus mutans TCI-239	[u'RIBOSOMAL']	[u'CLASS_II_BACTERIOCIN']	2	69_Antimicrobial protein BL-A60	0.545455		MLVDILTIKKGGIHMNTKMMKQFETMDAETLSHITGGGLYDGANGYAYRDSQGHWAYKVTKTPAQALTDVVVNSWASGAASFAAYA
CEBJ01	CSF	Streptococcus suis	[u'RIBOSOMAL']	[u'CLASS_II_LANTIPEPTIDE']	2	88_["A-3802-VI-7"]	0.678571	O=C(O)CCC4NC(=O)C(NC(=O)C6NC(=O)C(NC(=O)C(NC(=O)C1NC(=O)C(NC(=O)C(NC(=O)CNC(=O)C(NC(=O)C(NC(=O)C)CSC1)CO)Cc3c[nH]c2ccccc23)C(C)C)C(C)SCC(NC4(=O))C(=O)NCC(=O)NC5C(=O)NC(C(=O)NC(C(=O)NC(C(=O)NC(C(=O)NC(C(=O)OC)CS(=O)C5(C))C)CSC6(C))C(C)CC)C(C)C)CC(C)C)C(C)CC
JOQI01	STOOL	Escherichia coli 4-203-08_S4_C2	[u'RIBOSOMAL']	[u'LINEAR_AZOLE_CONTAINING_PEPTIDE']	3	601_["MccB17","MICROCIN B17","MICROCIN 17W"]	0.924528	O=C(O)C(N=C(O)C(N=C(O)C(N=C(O)CN=C(O)c1nc(oc1)CN=C(O)CN=C(O)c2nc(oc2)CN=C(O)CN=C(O)C(N=C(O)CN=C(O)CN=C(O)c3nc(oc3)c8nc(CN=C(O)C(N=C(O)C(N=C(O)c7nc(CN=C(O)CN=C(O)c6nc(CN=C(O)CN=C(O)CN=C(O)C(N=C(O)CN=C(O)CN=C(O)c5nc(c4nc(oc4)CN=C(O)CN=C(O)CN=C(O)CN=C(O)CN=C(O)CN=C(O)CN=C(O)CN=C(O)CN=C(O)CN=C(O)C(N=C(O)CN=C(O)C(N)C(C)C)C(C)CC)sc5)CCC(=N)O)sc6)sc7)CO)CC(=N)O)sc8)CC(=N)O)CO)Cc9cnc[nH]9)C(C)CC
AXSW01	ORAL	Streptococcus mutans PKUSS-HG01	[u'RIBOSOMAL']	[u'CLASS_II_BACTERIOCIN']	2	69_Antimicrobial protein BL-A60	0.545455		MNTRMMEQFETMDAETLSHVTGGGLYDGANGYAYRDSQGHWAYKVTKTPAQALTDVVVNSWASGAASFAAYA
LWOI01	URINE	Corynebacterium sp. HMSC05E07	[u'RIBOSOMAL']	[u'CLASS_II_LANTIPEPTIDE']	1	151_["Salivaricin 9"]	0.538462	CC(CC(C(NC(C(NC(C(NC(C(N/C(C(NC(C(NC(C(NC(C(NC(C(NC(C(NC(C(O)=O)CS1)=O)CS2)=O)CCCCN)=O)CC(C)C)=O)CCCCN)=O)CCCCN)=O)=C/C)=O)CC3=CNc4c3cccc4)=O)C1C)=O)C)=O)NC(C(NC(C(NC(C(NC(C(NC(C(C2C)NC(C(N5)CC(C)C)=O)=O)Cc6nc[nH]c6)=O)CCC(O)=O)=O)CSC(C)C(NC(C(NC(C(C(C)C)NC(C(C(C)C)NC(CNC(C(NC(CN)=O)CC(N)=O)=O)=O)=O)=O)CC(C)C)=O)C5=O)=O)CC(N)=O)=O)C
AHRG01	ORAL	Streptococcus mutans R221	[u'RIBOSOMAL']	[u'CLASS_II_LANTIPEPTIDE']	3	193_Smb B	1	N[C@@H]([C@H](CC)C)C(NCC(N/C(C(N/C(C(N[C@H](C(N[C@H](C(N[C@H](C(NC(C(N/C(C(N[C@@H](CC1=CC=CC=C1)C(N[C@H](C(N[C@@H]([C@H](CC)C)C(N[C@H](C(N[C@H](C(NCC(N[C@H](C(N[C@H](C(NCC(N[C@@H](CC2=CC=C(C=C2)O)C(N[C@H]3[C@H](CC)C)=O)=O)=O)CCCCN)=O)CC(N)=O)=O)=O)CC(C)C)=O)C(C)C)=O)=O)CSC[C@@H](C(N[C@H](C(N[C@H](C(N[C@H](C(N[C@H](C(N[C@H](C(N[C@@H](CS4)C(N[C@@H](CCSC)C(N[C@H](C(N[C@H](C(N[C@@H](CS5)C(NC(C(N[C@H]…
AHRG01	ORAL	Streptococcus mutans R221	[u'RIBOSOMAL']	[u'CLASS_II_LANTIPEPTIDE']	4	129_["streptococcin A-M49"]	0.804348	CCC(C(C(NC(C(NC(C(NC(C(NC(C(NC(C(NC(C(NC(C(NC1C(NC(C(NC(C(NC(C(NC(C(NC(C(N/C2=C\C)=O)C)=O)CC(C)C)=O)Cc3ccccc3)=O)C)=O)CC4=CNc5c4cccc5)=O)=O)CC(N)=O)=O)CC(C)C)=O)Cc6nc[nH]c6)=O)CS7)=O)CCC(O)=O)=O)Cc8nc[nH]c8)=O)CSCC(C(NC(C(NC(C(O)=O)=C)=O)CSC1C)=O)NC2=O)=O)NC(C(C7C)NC(C(NC(C(NC(C(C(C)C)NC(CNC(C(NC(C(NC(CN)=O)CCCCN)=O)CC(N)=O)=O)=O)=O)Cc9ccccc9)=O)CCCCN)=O)=O)C
AHRG01	ORAL	Streptococcus mutans R221	[u'RIBOSOMAL']	[u'CLASS_I_LANTIPEPTIDE']	6	113_["MUTACIN 1140","MUTICIN 1140"]	1	O=C(NC(C(=O)NC7C(=O)NC(C(=O)NC(C(=O)NC(=CC)C(=O)N6CCCC6(C(=O)NCC(=O)NC5C(=O)NC(C(=O)NC(C(=O)NC(C(=O)NCC(=O)NC2C(=O)NC(C(=O)NC(C(=O)NC1C(=O)NC(C(=O)NC(C(=O)NC=CSC1)CSC2)Cc3ccc(O)cc3)CC(=O)N)Cc4ccccc4)C(C)SC5)CCCNC(=N)N)C))CSC7)CC(C)C)Cc9c[nH]c8ccccc89)C(=C)NC(=O)C(NC(=O)C(N)Cc%10ccccc%10)CCCCN
AHRG01	ORAL	Streptococcus mutans R221	[u'RIBOSOMAL']	[u'CLASS_II_BACTERIOCIN']	7	69_Antimicrobial protein BL-A60	0.545455		MNTKMMEQFETMDAETLSHVTGGGLYDGANGYAYRDSQGHWAYKVTKTPAQALTDVVVNSWASGAASFAAYA
JXZU01	VAGINA	Staphylococcus aureus	[u'RIBOSOMAL']	[u'BACTERIAL_HEAD_TO_TAIL_CYCLIZED']	3	276_["PRE-T","10381-T","PRE-10381-T"]	0.571429	O=C(N)c3nc4c1nc(oc1C)C(NC(=O)c6nc(C(NC(=O)c2nc(oc2C)CNC(=O)C(NC(=O)c5nc(c4(cc3))sc5)C(C)C)C)sc6)C
AHSA01	ORAL	Streptococcus mutans A19	[u'RIBOSOMAL']	[u'CLASS_II_LANTIPEPTIDE']	1	127_["VARIACIN"]	0.688889	CCC(C(C(NC(C(NC(C(NC(C(NC(C(NC(C(NC(C(NC(C(NC(C(NC(C(NC(C(NC(C(NC(C(NC(C(N/C1=C/C)=O)Cc2ccccc2)=O)C(C)C)=O)Cc3ccccc3)=O)CCC(N)=O)=O)Cc4ccccc4)=O)CSCC(C(NC(C(O)=O)=C)=O)NC5=O)=O)CC(N)=O)=O)CCSC)=O)Cc6nc[nH]c6)=O)CS7)=O)CCC(O)=O)=O)Cc8nc[nH]c8)=O)CSCC5NC1=O)=O)NC(C(C7C)NC(C9CCCN9C(C(C(CC)C)NC(C(C(C)C)NC(CNC(C(NC(CN)=O)=C)=O)=O)=O)=O)=O)=O)C
AHSA01	ORAL	Streptococcus mutans A19	[u'RIBOSOMAL']	[u'CLASS_II_BACTERIOCIN']	3	69_Antimicrobial protein BL-A60	0.545455		MNTRMMEQFETMDAETLSHVTGGGLYDGSNGYAYRDSQGHWAYKVTKTPAQALTDVVVNSWASGAASFAAYA
AHSA01	ORAL	Streptococcus mutans A19	[u'RIBOSOMAL']	[u'CLASS_II_LANTIPEPTIDE']	4	193_Smb B	1	N[C@@H]([C@H](CC)C)C(NCC(N/C(C(N/C(C(N[C@H](C(N[C@H](C(N[C@H](C(NC(C(N/C(C(N[C@@H](CC1=CC=CC=C1)C(N[C@H](C(N[C@@H]([C@H](CC)C)C(N[C@H](C(N[C@H](C(NCC(N[C@H](C(N[C@H](C(NCC(N[C@@H](CC2=CC=C(C=C2)O)C(N[C@H]3[C@H](CC)C)=O)=O)=O)CCCCN)=O)CC(N)=O)=O)=O)CC(C)C)=O)C(C)C)=O)=O)CSC[C@@H](C(N[C@H](C(N[C@H](C(N[C@H](C(N[C@H](C(N[C@H](C(N[C@@H](CS4)C(N[C@@H](CCSC)C(N[C@H](C(N[C@H](C(N[C@@H](CS5)C(NC(C(N[C@H]…
LJOL01	VAGINA	Lactobacillus crispatus	[u'RIBOSOMAL']	[u'BACTERIAL_HEAD_TO_TAIL_CYCLIZED']	2	595_Syanodin I	0.636364	CC(C[C@@H](C(N[C@H](C(NCC(O)=O)=O)C)=O)NC(CNC([C@@H](NC(CNC([C@@H](NC([C@@H]1CCCN1C([C@@H](NC([C@@H]2CC(NCC(N[C@H](C(N[C@H](C(NCC(NCC(N[C@H](C(N[C@H](C(N2)=O)C(C)C)=O)[C@H](O)C)=O)=O)=O)CO)=O)CC(C)C)=O)=O)=O)C)=O)=O)C)=O)=O)CCC(N)=O)=O)=O)C
LTTO01	RESPIRATORY	Staphylococcus sp. HMSC067F10	[u'RIBOSOMAL']	[u'BACTERIAL_HEAD_TO_TAIL_CYCLIZED']	3	595_Syanodin I	0.590909	CC(C[C@@H](C(N[C@H](C(NCC(O)=O)=O)C)=O)NC(CNC([C@@H](NC(CNC([C@@H](NC([C@@H]1CCCN1C([C@@H](NC([C@@H]2CC(NCC(N[C@H](C(N[C@H](C(NCC(NCC(N[C@H](C(N[C@H](C(N2)=O)C(C)C)=O)[C@H](O)C)=O)=O)=O)CO)=O)CC(C)C)=O)=O)=O)C)=O)=O)C)=O)=O)CCC(N)=O)=O)=O)C
AGKH01	ORAL	Streptococcus mutans TCI-11	[u'RIBOSOMAL']	[u'CLASS_II_BACTERIOCIN']	2	69_Antimicrobial protein BL-A60	0.545455		MLVDILTIKKGGIHMNTRMMEQFETMDAETLSHVTGGGLYDGANGYAYRDSQGHWAYKVTKTPAQALTDVVVNSWASGAASFAAYA
LALM01	NOSE	Staphylococcus aureus	[u'RIBOSOMAL']	[u'CLASS_I_LANTIPEPTIDE']	4	105_["Lanthionine containing peptide","HYICIN M51"]	0.952381	O=C(N)CC5NC(=O)C(NC(=O)C(NC(=O)CNC(=O)C(=CC)NC(=O)C(NC(=O)C(NC(=O)C3NC(=O)CNC(=O)C4N(C(=O)C(NC(=O)C1NC(=O)C(NC(=O)C(=C)NC(=O)C(NC(=O)C(NC(=O)C(=CC)NC(=O)C(N)C(C)CC)CSC1)Cc2ccccc2)CC(C)C)C(C)SC3)CCC4)C)CCCCN)CSCC6NC(=O)C(NC(=O)C(NC5(=O))CSC=CNC6(=O))Cc7ccc(O)cc7)Cc8ccccc8
LNMK01	STOOL	Enterococcus faecium	[u'RIBOSOMAL']	[u'CLASS_II_BACTERIOCIN']	1	40_Enterocin A	1		MKHLKILSIKETQLIYGGTTHSGKYYGNGVYCTKNKCTVDWAKATTCIAGMSIGGFLGGAIPGKC
LNMK01	STOOL	Enterococcus faecium	[u'RIBOSOMAL']	[u'CLASS_II_BACTERIOCIN']	4	16_Bacteriocin T8	1		MKKKVLKHCVILGILGTCLAGIGTGIKVDAATYYGNGLYCNKEKCWVDWNQAKGEIGKIIVNGWVNHGPWAPRR
AHJB01	RESPIRATORY	Burkholderia pseudomallei 1258a	[u'RIBOSOMAL']	[u'LASSO_PEPTIDE']	8	561_["CAPISTRUIN"]	0.875	O[C@H](C)[C@@H](C(N1CCC[C@H]1C(NCC(N[C@@H](CC2=CC=CC=C2)C(N[C@H](C(N[C@H](C(N3CCC[C@H]3C(N[C@@H](C4)C(N[C@@H](C)C(N[C@H](C(N[C@H](C(N[C@@H]([C@H](CC)C)C(N[C@H](C(N[C@H](C(N[C@@H](CC5=CC=CC=C5)C(NCC(N[C@@H](CC6=CC=CC=C6)C(N[C@H](C(O)=O)CC(N)=O)=O)=O)=O)=O)CCCNC(N)=N)=O)CO)=O)=O)C(C)C)=O)CCCNC(N)=N)=O)=O)=O)=O)[C@@H](C)O)=O)CCC(N)=O)=O)=O)=O)=O)NC(CNC4=O)=O
CEBD01	CSF	Streptococcus suis	[u'RIBOSOMAL']	[u'CLASS_II_LANTIPEPTIDE']	2	88_["A-3802-VI-7"]	0.678571	O=C(O)CCC4NC(=O)C(NC(=O)C6NC(=O)C(NC(=O)C(NC(=O)C1NC(=O)C(NC(=O)C(NC(=O)CNC(=O)C(NC(=O)C(NC(=O)C)CSC1)CO)Cc3c[nH]c2ccccc23)C(C)C)C(C)SCC(NC4(=O))C(=O)NCC(=O)NC5C(=O)NC(C(=O)NC(C(=O)NC(C(=O)NC(C(=O)NC(C(=O)OC)CS(=O)C5(C))C)CSC6(C))C(C)CC)C(C)C)CC(C)C)C(C)CC
LDYC01	ORAL	Streptococcus dysgalactiae subsp. equisimilis	[u'RIBOSOMAL']	[u'LINEAR_AZOLE_CONTAINING_PEPTIDE']	2	600_["PLANTAZOLICIN B"]	0.789474	O=C(O)C(N=C(O)C1N=C(OC1(C))c2nc(oc2)c3nc(oc3)c4nc(oc4)c5nc(oc5)C(N=C(O)C(N=C(O)c6nc(oc6C)c7nc(oc7C)c%10nc(c8nc(oc8C)c9nc(C(N)CCCNC(=N)N)sc9)sc%10)C(C)CC)C(C)CC)Cc%11ccccc%11
JANN01	RESPIRATORY	Staphylococcus aureus LCT-SAG	[u'RIBOSOMAL']	[u'CLASS_I_LANTIPEPTIDE']	3	105_["Lanthionine containing peptide","HYICIN M51"]	0.952381	O=C(N)CC5NC(=O)C(NC(=O)C(NC(=O)CNC(=O)C(=CC)NC(=O)C(NC(=O)C(NC(=O)C3NC(=O)CNC(=O)C4N(C(=O)C(NC(=O)C1NC(=O)C(NC(=O)C(=C)NC(=O)C(NC(=O)C(NC(=O)C(=CC)NC(=O)C(N)C(C)CC)CSC1)Cc2ccccc2)CC(C)C)C(C)SC3)CCC4)C)CCCCN)CSCC6NC(=O)C(NC(=O)C(NC5(=O))CSC=CNC6(=O))Cc7ccc(O)cc7)Cc8ccccc8
AXZV01	VAGINA	Lactobacillus plantarum CMPG5300	[u'RIBOSOMAL']	[u'CLASS_II_BACTERIOCIN']	1	54_Plantaricin F	1		MLQFEKLQYSRLPQKKLAKISGGFNRGGYNFGKSVRHVVDAIGSVAGIRGILKSIR
AHSE01	ORAL	Streptococcus mutans T4	[u'RIBOSOMAL']	[u'CLASS_II_BACTERIOCIN']	5	69_Antimicrobial protein BL-A60	0.545455		MLVDILTIKKGGIHMNTRMMEQFETMDAETLSHVTGGGLYDGANGYAYRDSQGHWAYKVTKTPAQALTDVVVNSWASGAASFAAYA
JGSZ01	RESPIRATORY	Staphylococcus aureus DAR1942	[u'RIBOSOMAL']	[u'BACTERIAL_HEAD_TO_TAIL_CYCLIZED']	2	595_Syanodin I	0.590909	CC(C[C@@H](C(N[C@H](C(NCC(O)=O)=O)C)=O)NC(CNC([C@@H](NC(CNC([C@@H](NC([C@@H]1CCCN1C([C@@H](NC([C@@H]2CC(NCC(N[C@H](C(N[C@H](C(NCC(NCC(N[C@H](C(N[C@H](C(N2)=O)C(C)C)=O)[C@H](O)C)=O)=O)=O)CO)=O)CC(C)C)=O)=O)=O)C)=O)=O)C)=O)=O)CCC(N)=O)=O)=O)C
LFUV01	SKIN	Staphylococcus aureus subsp. aureus	[u'RIBOSOMAL']	[u'CLASS_I_LANTIPEPTIDE']	4	105_["Lanthionine containing peptide","HYICIN M51"]	0.952381	O=C(N)CC5NC(=O)C(NC(=O)C(NC(=O)CNC(=O)C(=CC)NC(=O)C(NC(=O)C(NC(=O)C3NC(=O)CNC(=O)C4N(C(=O)C(NC(=O)C1NC(=O)C(NC(=O)C(=C)NC(=O)C(NC(=O)C(NC(=O)C(=CC)NC(=O)C(N)C(C)CC)CSC1)Cc2ccccc2)CC(C)C)C(C)SC3)CCC4)C)CCCCN)CSCC6NC(=O)C(NC(=O)C(NC5(=O))CSC=CNC6(=O))Cc7ccc(O)cc7)Cc8ccccc8
AHRN01	ORAL	Streptococcus mutans 2ST1	[u'RIBOSOMAL']	[u'CLASS_II_BACTERIOCIN']	4	69_Antimicrobial protein BL-A60	0.545455		MLVDILTIKKGGIHMNTRMMEQFETMDAETLSHVTGGGLYDGANGYAYRDSQGHWAYKVTKTPAQALTDVVVNSWASGAASFAAYA
AWSC01	ORAL	Actinomyces graevenitzii F0530	[u'RIBOSOMAL']	[u'CLASS_I_LANTIPEPTIDE']	1	106_["Lanthionine containing peptide","HYICIN M51"]	0.738095	O=C(N)CC5NC(=O)C(NC(=O)C(NC(=O)CNC(=O)C(=CC)NC(=O)C(NC(=O)C(NC(=O)C3NC(=O)CNC(=O)C4N(C(=O)C(NC(=O)C1NC(=O)C(NC(=O)C(NC(=O)C(=C)NC(=O)C(NC(=O)C(=CC)NC(=O)C(N)C(C)CC)CSC1)Cc2ccccc2)CC(C)C)C(C)SC3)CCC4)C)CCCCN)CSCC6NC(=O)C(NC(=O)C(NC5(=O))CSC=CNC6(=O))Cc7ccc(O)cc7)Cc8ccccc8
ABSW01	URINE	Enterococcus faecium U0317	[u'RIBOSOMAL']	[u'CLASS_II_BACTERIOCIN']	2	40_Enterocin A	1		MKHLKILSIKETQLIYGGTTHSGKYYGNGVYCTKNKCTVDWAKATTCIAGMSIGGFLGGAIPGKC
ASZY01	RESPIRATORY	Streptococcus pneumoniae 1779n23_04	[u'RIBOSOMAL']	[u'CLASS_II_LANTIPEPTIDE']	2	140_["MICHIGANIN"]	0.666667	NC(C(NC(C(NC(C(NCC(NC(CC1=CNC2=C1C=CC=C2)C(NC3CC(C)C)=O)=O)=O)CO)=O)CSCC(C(N/C(C(NC(C(NC(C(NC(C(CC)C)C(NC(C(NC(CS)C(NCC(NC(C(NC(C(CC)C)C(NC(C(CC)C)C(NC(CS4)C(NC(C)C(NC(CS5)C(NC(C(O)=O)CCCNC(N)=N)=O)=O)=O)=O)=O)=O)C5C)=O)=O)=O)CCC(O)=O)=O)=O)C4C)=O)CC(C)C)=O)=C\C)=O)NC3=O)=O)CO
ASZY01	RESPIRATORY	Streptococcus pneumoniae 1779n23_04	[u'RIBOSOMAL']	[u'CLASS_II_LANTIPEPTIDE']	3	106_["Lanthionine containing peptide","HYICIN M51"]	0.690476	O=C(N)CC5NC(=O)C(NC(=O)C(NC(=O)CNC(=O)C(=CC)NC(=O)C(NC(=O)C(NC(=O)C3NC(=O)CNC(=O)C4N(C(=O)C(NC(=O)C1NC(=O)C(NC(=O)C(NC(=O)C(=C)NC(=O)C(NC(=O)C(=CC)NC(=O)C(N)C(C)CC)CSC1)Cc2ccccc2)CC(C)C)C(C)SC3)CCC4)C)CCCCN)CSCC6NC(=O)C(NC(=O)C(NC5(=O))CSC=CNC6(=O))Cc7ccc(O)cc7)Cc8ccccc8
ASZY01	RESPIRATORY	Streptococcus pneumoniae 1779n23_04	[u'RIBOSOMAL']	[u'CLASS_III_IV_LANTIPEPTIDE']	6	122_[MUTACIN B-NY266"]	0.595238	C/C=C(C(NCC(NC(C(NC(C(NC(C(NC(C(NC1Cc2ccc(O)cc2)=O)CS/C=C/NC3=O)=O)CC(N)=O)=O)Cc4ccccc4)=O)CSCC3NC1=O)=O)=O)\NC(C(NC(C(NC(C(NC(CNC(C5CCCN56)=O)=O)CSC(C)C(NC(C(NC(C(NC(C(NC(C(N7)CC8=CNc9c8cccc9)=O)=C)=O)Cc%10ccccc%10)=O)CSCC(NC(C(NC(C(Cc%11ccccc%11)N)=O)CCCCN)=O)C7=O)=O)C6=O)=O)C)=O)CCCCN)=O
AJRF02	STOOL	Enterococcus sp. GMD5E	[u'RIBOSOMAL']	[u'CLASS_II_BACTERIOCIN']	2	40_Enterocin A	1		MKHLKILSIKETQLIYGGTTHSGKYYGNGVYCTKNKCTVDWAKATTCIAGMSIGGFLGGAIPGKC
AJRF02	STOOL	Enterococcus sp. GMD5E	[u'RIBOSOMAL']	[u'CLASS_II_BACTERIOCIN']	3	17_Enterocin B	1		MQNVKELSTKEMKQIIGGENDHRMPNELNRPNNLSKGGAKCGAAIAGGLFGIPKGPLAWAAGLANVYSKCN
AHSX01	ORAL	Streptococcus mutans 1ID3	[u'RIBOSOMAL']	[u'CLASS_II_BACTERIOCIN']	6	69_Antimicrobial protein BL-A60	0.545455		MNTKMMEQFETMDTETLSHVTGGGLYDGANGYAYRDSQGHWAYKVTKTPAQALTDVVVNSWASGAASFAAYA
BCYK01	STOOL	Bifidobacterium longum subsp. longum	[u'RIBOSOMAL']	[u'CLASS_II_LANTIPEPTIDE']	1	199_Microbisporicin B	0.727273	NC(C(N/C(C(NC(C(NC(C(C)C)C(NC(C(NC1CC(C)C)=O)=C)=O)=O)CSCC(C(NC2C(NC(C(NC(CC3=CC=CC=C3)C(NC(CSC2C)C(NC(C(NC4C(NC(C(NCC(NCC(NCC(NC5C(NC(C(NC(CSC4)C(NC6C(NC(CC7=CC=CC=C7)C(NC(CSC5)C(N/C=C\SC6)=O)=O)=O)=O)=O)CC8=CC=CC=C8)=O)=O)=O)=O)=O)CCC(N)=O)=O)=O)C(C)O)=O)=O)=O)C)=O)=O)NC1=O)=O)=C\C)=O)C(C)CC
LVYR01	ORAL	Streptococcus pyogenes	[u'RIBOSOMAL']	[u'LINEAR_AZOLE_CONTAINING_PEPTIDE']	1	600_["PLANTAZOLICIN B"]	0.789474	O=C(O)C(N=C(O)C1N=C(OC1(C))c2nc(oc2)c3nc(oc3)c4nc(oc4)c5nc(oc5)C(N=C(O)C(N=C(O)c6nc(oc6C)c7nc(oc7C)c%10nc(c8nc(oc8C)c9nc(C(N)CCCNC(=N)N)sc9)sc%10)C(C)CC)C(C)CC)Cc%11ccccc%11
LVYR01	ORAL	Streptococcus pyogenes	[u'RIBOSOMAL']	[u'CLASS_I_LANTIPEPTIDE']	2	124_["STREPTIN"]	1	CC(CC1NC(C(NC(C(NC(C(NC(CNC(C(C(C)C)N)=O)=O)CSCC(C(NC(C(N2CCCC2C(NCC(NC(C(NC(C(NC(C(NC(C(NC(C(NC3C(C)C)=O)CC(C)C)=O)CCCCN)=O)CC4=CNc5c4cccc5)=O)CS6)=O)CSCC(C(NC(C(N/C(C(N/C(C(N/C(C(NC(C(NC(C(O)=O)CCCCN)=O)C(C)C)=O)=C/C)=O)=C/C)=O)=C/C)=O)Cc7ccccc7)=O)NC3=O)=O)=O)=O)C6C)=O)NC1=O)=O)CCCNC(N)=N)=O)Cc8ccc(O)cc8)=O)C
LVYR01	ORAL	Streptococcus pyogenes	[u'RIBOSOMAL']	[u'CLASS_II_LANTIPEPTIDE']	5	121_["SALIVARICIN A"]	0.9375	CCC(C(C(NC(C(NC(C(NC(C(NC(C(NC(C(NC(C(NC(C(N1CCCC1C(NC(C(NC(C(NC(C(NC(C(NC(C(NC2CS3)=O)C(C)C)=O)Cc4ccccc4)=O)C(C)C)=O)CSCC(C(O)=O)NC2=O)=O)CC(N)=O)=O)=O)CS5)=O)CC(O)=O)=O)CC(O)=O)=O)C3C)=O)C(CC)C)=O)C5C)=O)C)=O)NC(C(NC(CNC(C(NC(CNC(C(NC(C(CCCCN)N)=O)CCCNC(N)=N)=O)=O)CO)=O)=O)CC6=CNc7c6cccc7)=O)C
JGPT01	RESPIRATORY	Staphylococcus aureus DAR3844	[u'RIBOSOMAL']	[u'BACTERIAL_HEAD_TO_TAIL_CYCLIZED']	3	569_["XANTHOMONIN II"]	0.578947	CC(C)C[C@@H](C(N[C@@H](C)C(NCC(N[C@H](C(N[C@H](C(N[C@@H](CCSC)C(NCC(NCC(N[C@@H]([C@H](CC)C)C(N[C@H](C(N[C@H](C(O)=O)[C@@H](C)O)=O)[C@@H](C)O)=O)=O)=O)=O)=O)CCC(O)=O)=O)CC1)=O)=O)=O)NC([C@@H]2CCCN2C(CNC(CNC1=O)=O)=O)=O
LRPN01	VAGINA	Bacillus coagulans	[u'RIBOSOMAL']	[u'BACTERIAL_HEAD_TO_TAIL_CYCLIZED']	2	75_amylocyclicin	0.942029	CC(C)C[C@@H](C(N[C@@H](C)C(N[C@H](C(N[C@H](C(N[C@H](C(NCC(N[C@@H]([C@H](CC)C)C(N[C@H](C(N[C@H](C(N[C@@H](C)C(N[C@@H](C)C(N[C@@H](C)C(N[C@H](C(N[C@H](C(N[C@@H](C)C(N[C@@H]([C@H](CC)C)C(N[C@@H](CC(O)=O)C(N[C@@H]([C@H](CC)C)C(N[C@@H]([C@H](CC)C)C(N[C@@H](CC(O)=O)C(N[C@@H](C)C(N[C@@H](C)C(N[C@H](C(N[C@H](C(N[C@@H]([C@H](CC)C)C(N[C@@H](C)C(N[C@H](C(N[C@@H]([C@H](CC)C)C(N[C@@H]([C@H](CC)C)C(N[C@H](C(N[…
LNOX01	STOOL	Enterococcus faecium	[u'RIBOSOMAL']	[u'CLASS_II_BACTERIOCIN']	1	16_Bacteriocin T8	1		MKKKVLKHCVILGILGTCLAGIGTGIKVDAATYYGNGLYCNKEKCWVDWNQAKGEIGKIIVNGWVNHGPWAPRR
LNOX01	STOOL	Enterococcus faecium	[u'RIBOSOMAL']	[u'CLASS_II_BACTERIOCIN']	3	40_Enterocin A	1		MKHLKILSIKETQLIYGGTTHSGKYYGNGVYCTKNKCTVDWAKATTCIAGMSIGGFLGGAIPGKC
LTSV01	URINE	Nosocomiicoccus sp. HMSC059G07	[u'RIBOSOMAL']	[u'CLASS_III_IV_LANTIPEPTIDE']	1	204_Prochlorosin 4.3	0.636364	O=C(C(N[C@@H](C)C(N[C@H](C(NCC(NC1)=O)=O)CSC[C@@H](C(N[C@@H](CC(O)=O)C(N[C@H](C(N[C@H](C(N[C@@H](CCSC)C(N[C@@H](CC2=CC=CC=C2)C(N[C@@H](CS3)C(N[C@@H](CC4=CC=C(C=C4)O)C(O)=O)=O)=O)=O)=O)CO)=O)C3C)=O)=O)NC1=O)=O)=O)CC
JJMK01	ORAL	Streptococcus pneumoniae	[u'RIBOSOMAL']	[u'BACTERIAL_HEAD_TO_TAIL_CYCLIZED', u'CLASS_II_BACTERIOCIN']	1	644_[Mechercharstatin_A,IB_01211,MECHERCHARMYCIN_A,MECHERCHASTATIN]	0.625		MNTKTMSQFEIMDTEMLACVEGGGCNWGDFAKAGVGGGAARGLQLGIKTRTWQGAATGAVGGAILGGVAYAATCWW
JJMK01	ORAL	Streptococcus pneumoniae	[u'RIBOSOMAL']	[u'CLASS_II_LANTIPEPTIDE']	2	106_["Lanthionine containing peptide","HYICIN M51"]	0.690476	O=C(N)CC5NC(=O)C(NC(=O)C(NC(=O)CNC(=O)C(=CC)NC(=O)C(NC(=O)C(NC(=O)C3NC(=O)CNC(=O)C4N(C(=O)C(NC(=O)C1NC(=O)C(NC(=O)C(NC(=O)C(=C)NC(=O)C(NC(=O)C(=CC)NC(=O)C(N)C(C)CC)CSC1)Cc2ccccc2)CC(C)C)C(C)SC3)CCC4)C)CCCCN)CSCC6NC(=O)C(NC(=O)C(NC5(=O))CSC=CNC6(=O))Cc7ccc(O)cc7)Cc8ccccc8
LNMG01	STOOL	Enterococcus faecium	[u'RIBOSOMAL']	[u'CLASS_II_BACTERIOCIN']	2	40_Enterocin A	1		MKHLKILSIKETQLIYGGTTHSGKYYGNGVYCTKNKCTVDWAKATTCIAGMSIGGFLGGAIPGKC
LNMG01	STOOL	Enterococcus faecium	[u'RIBOSOMAL']	[u'CLASS_II_BACTERIOCIN']	3	16_Bacteriocin T8	1		MKKKVLKHCVILGILGTCLAGIGTGIKVDAATYYGNGLYCNKEKCWVDWNQAKGEIGKIIVNGWVNHGPWAPRR
CDXM01	CSF	Streptococcus suis	[u'RIBOSOMAL']	[u'CLASS_II_LANTIPEPTIDE']	1	88_["A-3802-VI-7"]	0.678571	O=C(O)CCC4NC(=O)C(NC(=O)C6NC(=O)C(NC(=O)C(NC(=O)C1NC(=O)C(NC(=O)C(NC(=O)CNC(=O)C(NC(=O)C(NC(=O)C)CSC1)CO)Cc3c[nH]c2ccccc23)C(C)C)C(C)SCC(NC4(=O))C(=O)NCC(=O)NC5C(=O)NC(C(=O)NC(C(=O)NC(C(=O)NC(C(=O)NC(C(=O)OC)CS(=O)C5(C))C)CSC6(C))C(C)CC)C(C)C)CC(C)C)C(C)CC
JGSW01	RESPIRATORY	Staphylococcus aureus DAR1938	[u'RIBOSOMAL']	[u'BACTERIAL_HEAD_TO_TAIL_CYCLIZED']	3	595_Syanodin I	0.590909	CC(C[C@@H](C(N[C@H](C(NCC(O)=O)=O)C)=O)NC(CNC([C@@H](NC(CNC([C@@H](NC([C@@H]1CCCN1C([C@@H](NC([C@@H]2CC(NCC(N[C@H](C(N[C@H](C(NCC(NCC(N[C@H](C(N[C@H](C(N2)=O)C(C)C)=O)[C@H](O)C)=O)=O)=O)CO)=O)CC(C)C)=O)=O)=O)C)=O)=O)C)=O)=O)CCC(N)=O)=O)=O)C
LAKS01	RESPIRATORY	Streptococcus dysgalactiae subsp. equisimilis	[u'RIBOSOMAL']	[u'LINEAR_AZOLE_CONTAINING_PEPTIDE']	4	600_["PLANTAZOLICIN B"]	0.789474	O=C(O)C(N=C(O)C1N=C(OC1(C))c2nc(oc2)c3nc(oc3)c4nc(oc4)c5nc(oc5)C(N=C(O)C(N=C(O)c6nc(oc6C)c7nc(oc7C)c%10nc(c8nc(oc8C)c9nc(C(N)CCCNC(=N)N)sc9)sc%10)C(C)CC)C(C)CC)Cc%11ccccc%11
LAKS01	RESPIRATORY	Streptococcus dysgalactiae subsp. equisimilis	[u'RIBOSOMAL']	[u'CLASS_I_LANTIPEPTIDE']	5	161_["Avermipeptin"]	0.594595	NCC(NCC(NCC(N[C@@H](C)C(N[C@H](C(N/C(C(N[C@H]1C(C)C)=O)=C\C)=O)C[C@](CSC[C@@H](C(N[C@H](C(N[C@H](C(N[C@@H](C)C(N[C@H]2C)=O)=O)C[C@](CSC[C@@H](C(N[C@H](C(O)=O)CC(C)C)=O)NC3=O)(C(N[C@H](C(N[C@H](C(N[C@H]3CC(C)C)=O)CC(C)C)=O)C(C)C)=O)NC2=O)=O)C(C)C)=O)NC4=O)(C(N[C@H](C(N[C@H](C(NC4=C)=O)CC(C)C)=O)CC(C)C)=O)NC1=O)=O)=O)=O)=O
MCFM01	RESPIRATORY	Staphylococcus aureus	[u'RIBOSOMAL']	[u'BACTERIAL_HEAD_TO_TAIL_CYCLIZED']	4	595_Syanodin I	0.590909	CC(C[C@@H](C(N[C@H](C(NCC(O)=O)=O)C)=O)NC(CNC([C@@H](NC(CNC([C@@H](NC([C@@H]1CCCN1C([C@@H](NC([C@@H]2CC(NCC(N[C@H](C(N[C@H](C(NCC(NCC(N[C@H](C(N[C@H](C(N2)=O)C(C)C)=O)[C@H](O)C)=O)=O)=O)CO)=O)CC(C)C)=O)=O)=O)C)=O)=O)C)=O)=O)CCC(N)=O)=O)=O)C
JNSB01	STOOL	Escherichia coli 3-105-05_S1_C3	[u'RIBOSOMAL']	[u'LINEAR_AZOLE_CONTAINING_PEPTIDE']	3	601_["MccB17","MICROCIN B17","MICROCIN 17W"]	1	O=C(O)C(N=C(O)C(N=C(O)C(N=C(O)CN=C(O)c1nc(oc1)CN=C(O)CN=C(O)c2nc(oc2)CN=C(O)CN=C(O)C(N=C(O)CN=C(O)CN=C(O)c3nc(oc3)c8nc(CN=C(O)C(N=C(O)C(N=C(O)c7nc(CN=C(O)CN=C(O)c6nc(CN=C(O)CN=C(O)CN=C(O)C(N=C(O)CN=C(O)CN=C(O)c5nc(c4nc(oc4)CN=C(O)CN=C(O)CN=C(O)CN=C(O)CN=C(O)CN=C(O)CN=C(O)CN=C(O)CN=C(O)CN=C(O)C(N=C(O)CN=C(O)C(N)C(C)C)C(C)CC)sc5)CCC(=N)O)sc6)sc7)CO)CC(=N)O)sc8)CC(=N)O)CO)Cc9cnc[nH]9)C(C)CC
AGMO01	ORAL	Streptococcus mutans TCI-399	[u'RIBOSOMAL']	[u'CLASS_II_BACTERIOCIN']	2	69_Antimicrobial protein BL-A60	0.545455		MNTKMMEQFETMDAETLSHVTGGGLYDGANGYAYRDSQGHWAYKVTKTPAQALTDVVVNSWASGAASFAAYA
AWPA01	ORAL	Streptococcus pyogenes SP3-LAU	[u'RIBOSOMAL']	[u'LINEAR_AZOLE_CONTAINING_PEPTIDE']	2	600_["PLANTAZOLICIN B"]	0.789474	O=C(O)C(N=C(O)C1N=C(OC1(C))c2nc(oc2)c3nc(oc3)c4nc(oc4)c5nc(oc5)C(N=C(O)C(N=C(O)c6nc(oc6C)c7nc(oc7C)c%10nc(c8nc(oc8C)c9nc(C(N)CCCNC(=N)N)sc9)sc%10)C(C)CC)C(C)CC)Cc%11ccccc%11
AWPA01	ORAL	Streptococcus pyogenes SP3-LAU	[u'RIBOSOMAL']	[u'CLASS_I_LANTIPEPTIDE']	3	124_["STREPTIN"]	1	CC(CC1NC(C(NC(C(NC(C(NC(CNC(C(C(C)C)N)=O)=O)CSCC(C(NC(C(N2CCCC2C(NCC(NC(C(NC(C(NC(C(NC(C(NC(C(NC3C(C)C)=O)CC(C)C)=O)CCCCN)=O)CC4=CNc5c4cccc5)=O)CS6)=O)CSCC(C(NC(C(N/C(C(N/C(C(N/C(C(NC(C(NC(C(O)=O)CCCCN)=O)C(C)C)=O)=C/C)=O)=C/C)=O)=C/C)=O)Cc7ccccc7)=O)NC3=O)=O)=O)=O)C6C)=O)NC1=O)=O)CCCNC(N)=N)=O)Cc8ccc(O)cc8)=O)C
AWPA01	ORAL	Streptococcus pyogenes SP3-LAU	[u'RIBOSOMAL']	[u'CLASS_II_LANTIPEPTIDE']	4	121_["SALIVARICIN A"]	0.9375	CCC(C(C(NC(C(NC(C(NC(C(NC(C(NC(C(NC(C(NC(C(N1CCCC1C(NC(C(NC(C(NC(C(NC(C(NC(C(NC2CS3)=O)C(C)C)=O)Cc4ccccc4)=O)C(C)C)=O)CSCC(C(O)=O)NC2=O)=O)CC(N)=O)=O)=O)CS5)=O)CC(O)=O)=O)CC(O)=O)=O)C3C)=O)C(CC)C)=O)C5C)=O)C)=O)NC(C(NC(CNC(C(NC(CNC(C(NC(C(CCCCN)N)=O)CCCNC(N)=N)=O)=O)CO)=O)=O)CC6=CNc7c6cccc7)=O)C
JNMX01	STOOL	Escherichia coli 3-475-03_S4_C2	[u'RIBOSOMAL']	[u'LINEAR_AZOLE_CONTAINING_PEPTIDE']	3	601_["MccB17","MICROCIN B17","MICROCIN 17W"]	1	O=C(O)C(N=C(O)C(N=C(O)C(N=C(O)CN=C(O)c1nc(oc1)CN=C(O)CN=C(O)c2nc(oc2)CN=C(O)CN=C(O)C(N=C(O)CN=C(O)CN=C(O)c3nc(oc3)c8nc(CN=C(O)C(N=C(O)C(N=C(O)c7nc(CN=C(O)CN=C(O)c6nc(CN=C(O)CN=C(O)CN=C(O)C(N=C(O)CN=C(O)CN=C(O)c5nc(c4nc(oc4)CN=C(O)CN=C(O)CN=C(O)CN=C(O)CN=C(O)CN=C(O)CN=C(O)CN=C(O)CN=C(O)CN=C(O)C(N=C(O)CN=C(O)C(N)C(C)C)C(C)CC)sc5)CCC(=N)O)sc6)sc7)CO)CC(=N)O)sc8)CC(=N)O)CO)Cc9cnc[nH]9)C(C)CC
AHRD01	ORAL	Streptococcus mutans SA38	[u'RIBOSOMAL']	[u'CLASS_II_BACTERIOCIN']	6	69_Antimicrobial protein BL-A60	0.545455		MLVDILTIKKGGIHMNTKMMEQFETMDAETLSHVTGGGLYDGANGYAYRDSQGHWAYKVTKTPAQALTDVVVNSWASGAASFAAYA
AUWX01	STOOL	Enterococcus faecium E155	[u'RIBOSOMAL']	[u'CLASS_II_BACTERIOCIN']	2	40_Enterocin A	1		MKHLKILSIKETQLIYGGTTHSGKYYGNGVYCTKNKCTVDWAKATTCIAGMSIGGFLGGAIPGKC
AUWX01	STOOL	Enterococcus faecium E155	[u'RIBOSOMAL']	[u'CLASS_II_BACTERIOCIN']	4	62_Bacteriocin enterocin-M	0.842105		MTNFGTKVDAATRSYDNGIYCNNSKCWVNWGEAKENIAGIVISGWASGLAGMGH
AHSF01	ORAL	Streptococcus mutans N34	[u'RIBOSOMAL']	[u'CLASS_II_LANTIPEPTIDE']	1	114_["MUTACIN-II","MUTACIN-T8"]	0.95	O=C(O)CCC6NC(=O)C(NC(=O)C8NC(=O)C(NC(=O)C(NC(=O)C5N(C(=O)C(NC(=O)C(NC(=O)CNC(=O)C(NC(=O)C(NC(=O)C(NC(=O)C(NC(=O)CC(=O)N)CCCNC(=N)N)Cc2c[nH]c1ccccc12)Cc4c[nH]c3ccccc34)CCC(=O)N)C(C)C)C(C)C)CCC5)C(C)SCC(NC6(=O))C(=O)NC(C(=O)NC(C(=O)NC(C(=O)NC7C(=O)NC(C(=O)NC(C(=O)NC(C(=O)NC(C(=O)NC(C(=O)NC(=CC)C(=O)NC(C(=O)NC(C(=O)O)CSC7)CSC8)Cc9ccccc9)C(C)C)Cc%10nc[nH]c%10)CCC(=O)N)Cc%12c[nH]c%11ccccc%11%12)CC(=O)…
AHSF01	ORAL	Streptococcus mutans N34	[u'RIBOSOMAL']	[u'CLASS_II_BACTERIOCIN']	3	69_Antimicrobial protein BL-A60	0.545455		MNTKMMEQFETMDTETLSHVTGGGLYDGANGYAYRDSQGHWAYKVTKTPAQALTDVVVNSWASGAASFAAYA
JYAP01	URINE	Staphylococcus aureus	[u'RIBOSOMAL']	[u'BACTERIAL_HEAD_TO_TAIL_CYCLIZED']	2	595_Syanodin I	0.590909	CC(C[C@@H](C(N[C@H](C(NCC(O)=O)=O)C)=O)NC(CNC([C@@H](NC(CNC([C@@H](NC([C@@H]1CCCN1C([C@@H](NC([C@@H]2CC(NCC(N[C@H](C(N[C@H](C(NCC(NCC(N[C@H](C(N[C@H](C(N2)=O)C(C)C)=O)[C@H](O)C)=O)=O)=O)CO)=O)CC(C)C)=O)=O)=O)C)=O)=O)C)=O)=O)CCC(N)=O)=O)=O)C
JNSA01	STOOL	Escherichia coli 3-105-05_S1_C2	[u'RIBOSOMAL']	[u'LINEAR_AZOLE_CONTAINING_PEPTIDE']	5	601_["MccB17","MICROCIN B17","MICROCIN 17W"]	0.792453	O=C(O)C(N=C(O)C(N=C(O)C(N=C(O)CN=C(O)c1nc(oc1)CN=C(O)CN=C(O)c2nc(oc2)CN=C(O)CN=C(O)C(N=C(O)CN=C(O)CN=C(O)c3nc(oc3)c8nc(CN=C(O)C(N=C(O)C(N=C(O)c7nc(CN=C(O)CN=C(O)c6nc(CN=C(O)CN=C(O)CN=C(O)C(N=C(O)CN=C(O)CN=C(O)c5nc(c4nc(oc4)CN=C(O)CN=C(O)CN=C(O)CN=C(O)CN=C(O)CN=C(O)CN=C(O)CN=C(O)CN=C(O)CN=C(O)C(N=C(O)CN=C(O)C(N)C(C)C)C(C)CC)sc5)CCC(=N)O)sc6)sc7)CO)CC(=N)O)sc8)CC(=N)O)CO)Cc9cnc[nH]9)C(C)CC
JMGB01	SKIN	Staphylococcus sp. TE8	[u'RIBOSOMAL']	[u'CLASS_I_LANTIPEPTIDE']	2	106_["Lanthionine containing peptide","HYICIN M51"]	0.666667	O=C(N)CC5NC(=O)C(NC(=O)C(NC(=O)CNC(=O)C(=CC)NC(=O)C(NC(=O)C(NC(=O)C3NC(=O)CNC(=O)C4N(C(=O)C(NC(=O)C1NC(=O)C(NC(=O)C(NC(=O)C(=C)NC(=O)C(NC(=O)C(=CC)NC(=O)C(N)C(C)CC)CSC1)Cc2ccccc2)CC(C)C)C(C)SC3)CCC4)C)CCCCN)CSCC6NC(=O)C(NC(=O)C(NC5(=O))CSC=CNC6(=O))Cc7ccc(O)cc7)Cc8ccccc8
CEBM01	CSF	Streptococcus suis	[u'RIBOSOMAL']	[u'CLASS_I_LANTIPEPTIDE']	2	148_["NISIN U"]	0.941176	CCC(C(C(N/C(C(NC(C(NC(C(NC(C(NC1CC(C)C)=O)=C)=O)CCCCN)=O)CSCC(C(NC(C(N2CCCC2C(NCC(NC(C(NC(C(NC(C(NCC(NC(C(NC(C(NC(C(N/C(C(NC(C(N3CCCC3C(NC(C(NC(C(NC(C(NC(C(NC(C(NC(C(NCC(NC(C(NC(C(NC(C(NCC(O)=O)=O)Cc4ccccc4)=O)Cc5nc[nH]c5)=O)CS6)=O)=O)CS7)=O)C6C)=O)C)=O)C7C)=O)CCCCN)=O)CC(C)C)=O)=O)CS8)=O)=C\C)=O)CCSC)=O)CC(C)C)=O)C(CC)C)=O)=O)C8C)=O)CCCCN)=O)CS9)=O)=O)=O)C9C)=O)NC1=O)=O)=C\C)=O)N)C
LTOL01	URINE	Enterococcus sp. HMSC074F07	[u'RIBOSOMAL']	[u'CLASS_II_BACTERIOCIN']	1	16_Bacteriocin T8	1		MKKKVLKHCVILGILGTCLAGIGTGIKVDAATYYGNGLYCNKEKCWVDWNQAKGEIGKIIVNGWVNHGPWAPRR
LTOL01	URINE	Enterococcus sp. HMSC074F07	[u'RIBOSOMAL']	[u'CLASS_II_BACTERIOCIN']	2	40_Enterocin A	1		MKHLKILSIKETQLIYGGTTHSGKYYGNGVYCTKNKCTVDWAKATTCIAGMSIGGFLGGAIPGKC
JXHU01	STOOL	Staphylococcus aureus subsp. aureus	[u'RIBOSOMAL']	[u'CLASS_I_LANTIPEPTIDE']	2	105_["Lanthionine containing peptide","HYICIN M51"]	0.952381	O=C(N)CC5NC(=O)C(NC(=O)C(NC(=O)CNC(=O)C(=CC)NC(=O)C(NC(=O)C(NC(=O)C3NC(=O)CNC(=O)C4N(C(=O)C(NC(=O)C1NC(=O)C(NC(=O)C(=C)NC(=O)C(NC(=O)C(NC(=O)C(=CC)NC(=O)C(N)C(C)CC)CSC1)Cc2ccccc2)CC(C)C)C(C)SC3)CCC4)C)CCCCN)CSCC6NC(=O)C(NC(=O)C(NC5(=O))CSC=CNC6(=O))Cc7ccc(O)cc7)Cc8ccccc8
LTKG01	STOOL	Enterococcus sp. HMSC056C08	[u'RIBOSOMAL']	[u'CLASS_II_BACTERIOCIN']	1	40_Enterocin A	1		MKHLKILSIKETQLIYGGTTHSGKYYGNGVYCTKNKCTVDWAKATTCIAGMSIGGFLGGAIPGKC
LWHF01	STOOL	Enterococcus faecium	[u'RIBOSOMAL']	[u'CLASS_II_BACTERIOCIN']	3	21_Enterocin L50A	0.954545		MGAIAKLVAKFGWPIVKKYYKQIMQFIGEGWAINKIIEWIKKHI
LWHF01	STOOL	Enterococcus faecium	[u'RIBOSOMAL']	[u'CLASS_II_BACTERIOCIN']	4	62_Bacteriocin enterocin-M	0.894737		MRKKLFSLALIGIFGLVVTNFGTKVDAATRSYGNGVYCNNSKCWVNWGEAKENIAGIVISGWASGLAGMGH
LRGK01	SKIN	Streptococcus pyogenes	[u'RIBOSOMAL']	[u'LINEAR_AZOLE_CONTAINING_PEPTIDE']	2	600_["PLANTAZOLICIN B"]	0.789474	O=C(O)C(N=C(O)C1N=C(OC1(C))c2nc(oc2)c3nc(oc3)c4nc(oc4)c5nc(oc5)C(N=C(O)C(N=C(O)c6nc(oc6C)c7nc(oc7C)c%10nc(c8nc(oc8C)c9nc(C(N)CCCNC(=N)N)sc9)sc%10)C(C)CC)C(C)CC)Cc%11ccccc%11
LRGK01	SKIN	Streptococcus pyogenes	[u'RIBOSOMAL']	[u'CLASS_II_LANTIPEPTIDE']	3	121_["SALIVARICIN A"]	0.9375	CCC(C(C(NC(C(NC(C(NC(C(NC(C(NC(C(NC(C(NC(C(N1CCCC1C(NC(C(NC(C(NC(C(NC(C(NC(C(NC2CS3)=O)C(C)C)=O)Cc4ccccc4)=O)C(C)C)=O)CSCC(C(O)=O)NC2=O)=O)CC(N)=O)=O)=O)CS5)=O)CC(O)=O)=O)CC(O)=O)=O)C3C)=O)C(CC)C)=O)C5C)=O)C)=O)NC(C(NC(CNC(C(NC(CNC(C(NC(C(CCCCN)N)=O)CCCNC(N)=N)=O)=O)CO)=O)=O)CC6=CNc7c6cccc7)=O)C
LRGK01	SKIN	Streptococcus pyogenes	[u'RIBOSOMAL']	[u'CLASS_I_LANTIPEPTIDE']	4	124_["STREPTIN"]	1	CC(CC1NC(C(NC(C(NC(C(NC(CNC(C(C(C)C)N)=O)=O)CSCC(C(NC(C(N2CCCC2C(NCC(NC(C(NC(C(NC(C(NC(C(NC(C(NC3C(C)C)=O)CC(C)C)=O)CCCCN)=O)CC4=CNc5c4cccc5)=O)CS6)=O)CSCC(C(NC(C(N/C(C(N/C(C(N/C(C(NC(C(NC(C(O)=O)CCCCN)=O)C(C)C)=O)=C/C)=O)=C/C)=O)=C/C)=O)Cc7ccccc7)=O)NC3=O)=O)=O)=O)C6C)=O)NC1=O)=O)CCCNC(N)=N)=O)Cc8ccc(O)cc8)=O)C
LPVQ01	STOOL	Streptococcus gallolyticus	[u'RIBOSOMAL']	[u'CLASS_II_BACTERIOCIN']	1	39_Bacteriocin ubericin-A	0.857143		MNTKTFDQFDVMTDAELSTVEGGGWVKCGLGTVGSALTGGVAGAAVGTVTLPIFGTVSGTAAGFWGGAATGAATFC
LRGQ01	SKIN	Streptococcus pyogenes	[u'RIBOSOMAL']	[u'LINEAR_AZOLE_CONTAINING_PEPTIDE']	2	600_["PLANTAZOLICIN B"]	0.789474	O=C(O)C(N=C(O)C1N=C(OC1(C))c2nc(oc2)c3nc(oc3)c4nc(oc4)c5nc(oc5)C(N=C(O)C(N=C(O)c6nc(oc6C)c7nc(oc7C)c%10nc(c8nc(oc8C)c9nc(C(N)CCCNC(=N)N)sc9)sc%10)C(C)CC)C(C)CC)Cc%11ccccc%11
LRGQ01	SKIN	Streptococcus pyogenes	[u'RIBOSOMAL']	[u'CLASS_II_LANTIPEPTIDE']	3	121_["SALIVARICIN A"]	0.9375	CCC(C(C(NC(C(NC(C(NC(C(NC(C(NC(C(NC(C(NC(C(N1CCCC1C(NC(C(NC(C(NC(C(NC(C(NC(C(NC2CS3)=O)C(C)C)=O)Cc4ccccc4)=O)C(C)C)=O)CSCC(C(O)=O)NC2=O)=O)CC(N)=O)=O)=O)CS5)=O)CC(O)=O)=O)CC(O)=O)=O)C3C)=O)C(CC)C)=O)C5C)=O)C)=O)NC(C(NC(CNC(C(NC(CNC(C(NC(C(CCCCN)N)=O)CCCNC(N)=N)=O)=O)CO)=O)=O)CC6=CNc7c6cccc7)=O)C
LTJG01	VAGINA	Enterococcus sp. HMSC069A01	[u'RIBOSOMAL']	[u'CLASS_II_BACTERIOCIN']	1	40_Enterocin A	1		MHIKNTKTTFILSSEELKNIQGGSAVGVLGTTFSGATAGVKLCSAGGPYAIAACGVGGALLGAGFSMWTGA
LTJG01	VAGINA	Enterococcus sp. HMSC069A01	[u'RIBOSOMAL']	[u'CLASS_II_BACTERIOCIN']	3	17_Enterocin B	1		QNVKELSTKEMKQIIGGENDHRMPNELNRPNNLSKGGAKCGAAIAGGLFGIPKGPLAWAAGLANVYSKCN
CDCO01	GI	Streptococcus agalactiae	[u'RIBOSOMAL']	[u'CLASS_I_LANTIPEPTIDE']	2	148_["NISIN U"]	0.941176	CCC(C(C(N/C(C(NC(C(NC(C(NC(C(NC1CC(C)C)=O)=C)=O)CCCCN)=O)CSCC(C(NC(C(N2CCCC2C(NCC(NC(C(NC(C(NC(C(NCC(NC(C(NC(C(NC(C(N/C(C(NC(C(N3CCCC3C(NC(C(NC(C(NC(C(NC(C(NC(C(NC(C(NCC(NC(C(NC(C(NC(C(NCC(O)=O)=O)Cc4ccccc4)=O)Cc5nc[nH]c5)=O)CS6)=O)=O)CS7)=O)C6C)=O)C)=O)C7C)=O)CCCCN)=O)CC(C)C)=O)=O)CS8)=O)=C\C)=O)CCSC)=O)CC(C)C)=O)C(CC)C)=O)=O)C8C)=O)CCCCN)=O)CS9)=O)=O)=O)C9C)=O)NC1=O)=O)=C\C)=O)N)C
CDXQ01	CSF	Streptococcus suis	[u'RIBOSOMAL']	[u'CLASS_II_LANTIPEPTIDE']	1	88_["A-3802-VI-7"]	0.678571	O=C(O)CCC4NC(=O)C(NC(=O)C6NC(=O)C(NC(=O)C(NC(=O)C1NC(=O)C(NC(=O)C(NC(=O)CNC(=O)C(NC(=O)C(NC(=O)C)CSC1)CO)Cc3c[nH]c2ccccc23)C(C)C)C(C)SCC(NC4(=O))C(=O)NCC(=O)NC5C(=O)NC(C(=O)NC(C(=O)NC(C(=O)NC(C(=O)NC(C(=O)OC)CS(=O)C5(C))C)CSC6(C))C(C)CC)C(C)C)CC(C)C)C(C)CC
MBLI01	VAGINA	Streptococcus agalactiae	[u'RIBOSOMAL']	[u'CLASS_I_LANTIPEPTIDE']	3	148_["NISIN U"]	0.941176	CCC(C(C(N/C(C(NC(C(NC(C(NC(C(NC1CC(C)C)=O)=C)=O)CCCCN)=O)CSCC(C(NC(C(N2CCCC2C(NCC(NC(C(NC(C(NC(C(NCC(NC(C(NC(C(NC(C(N/C(C(NC(C(N3CCCC3C(NC(C(NC(C(NC(C(NC(C(NC(C(NC(C(NCC(NC(C(NC(C(NC(C(NCC(O)=O)=O)Cc4ccccc4)=O)Cc5nc[nH]c5)=O)CS6)=O)=O)CS7)=O)C6C)=O)C)=O)C7C)=O)CCCCN)=O)CC(C)C)=O)=O)CS8)=O)=C\C)=O)CCSC)=O)CC(C)C)=O)C(CC)C)=O)=O)C8C)=O)CCCCN)=O)CS9)=O)=O)=O)C9C)=O)NC1=O)=O)=C\C)=O)N)C
JGOZ01	FEET	Staphylococcus aureus DAR3632	[u'RIBOSOMAL']	[u'BACTERIAL_HEAD_TO_TAIL_CYCLIZED']	3	569_["XANTHOMONIN II"]	0.578947	CC(C)C[C@@H](C(N[C@@H](C)C(NCC(N[C@H](C(N[C@H](C(N[C@@H](CCSC)C(NCC(NCC(N[C@@H]([C@H](CC)C)C(N[C@H](C(N[C@H](C(O)=O)[C@@H](C)O)=O)[C@@H](C)O)=O)=O)=O)=O)=O)CCC(O)=O)=O)CC1)=O)=O)=O)NC([C@@H]2CCCN2C(CNC(CNC1=O)=O)=O)=O
AGMA01	ORAL	Streptococcus mutans TCI-249	[u'RIBOSOMAL']	[u'CLASS_II_BACTERIOCIN']	3	69_Antimicrobial protein BL-A60	0.545455		MLVDILTIKKGGIHMNTKMMEQFETMDAETLSHVTGGGLYDGANGYAYRDSQGHWAYKVTKTPAQALTDVVVNSWASGAASFAAYA
JGOQ01	URINE	Staphylococcus aureus DAR3609	[u'RIBOSOMAL']	[u'BACTERIAL_HEAD_TO_TAIL_CYCLIZED']	2	595_Syanodin I	0.590909	CC(C[C@@H](C(N[C@H](C(NCC(O)=O)=O)C)=O)NC(CNC([C@@H](NC(CNC([C@@H](NC([C@@H]1CCCN1C([C@@H](NC([C@@H]2CC(NCC(N[C@H](C(N[C@H](C(NCC(NCC(N[C@H](C(N[C@H](C(N2)=O)C(C)C)=O)[C@H](O)C)=O)=O)=O)CO)=O)CC(C)C)=O)=O)=O)C)=O)=O)C)=O)=O)CCC(N)=O)=O)=O)C
CDTK01	CSF	Streptococcus suis	[u'RIBOSOMAL']	[u'CLASS_II_LANTIPEPTIDE']	1	88_["A-3802-VI-7"]	0.678571	O=C(O)CCC4NC(=O)C(NC(=O)C6NC(=O)C(NC(=O)C(NC(=O)C1NC(=O)C(NC(=O)C(NC(=O)CNC(=O)C(NC(=O)C(NC(=O)C)CSC1)CO)Cc3c[nH]c2ccccc23)C(C)C)C(C)SCC(NC4(=O))C(=O)NCC(=O)NC5C(=O)NC(C(=O)NC(C(=O)NC(C(=O)NC(C(=O)NC(C(=O)OC)CS(=O)C5(C))C)CSC6(C))C(C)CC)C(C)C)CC(C)C)C(C)CC
AWPD01	ORAL	Streptococcus pyogenes SP6-LAU	[u'RIBOSOMAL']	[u'CLASS_I_LANTIPEPTIDE']	1	124_["STREPTIN"]	1	CC(CC1NC(C(NC(C(NC(C(NC(CNC(C(C(C)C)N)=O)=O)CSCC(C(NC(C(N2CCCC2C(NCC(NC(C(NC(C(NC(C(NC(C(NC(C(NC3C(C)C)=O)CC(C)C)=O)CCCCN)=O)CC4=CNc5c4cccc5)=O)CS6)=O)CSCC(C(NC(C(N/C(C(N/C(C(N/C(C(NC(C(NC(C(O)=O)CCCCN)=O)C(C)C)=O)=C/C)=O)=C/C)=O)=C/C)=O)Cc7ccccc7)=O)NC3=O)=O)=O)=O)C6C)=O)NC1=O)=O)CCCNC(N)=N)=O)Cc8ccc(O)cc8)=O)C
AWPD01	ORAL	Streptococcus pyogenes SP6-LAU	[u'RIBOSOMAL']	[u'LINEAR_AZOLE_CONTAINING_PEPTIDE']	2	600_["PLANTAZOLICIN B"]	0.789474	O=C(O)C(N=C(O)C1N=C(OC1(C))c2nc(oc2)c3nc(oc3)c4nc(oc4)c5nc(oc5)C(N=C(O)C(N=C(O)c6nc(oc6C)c7nc(oc7C)c%10nc(c8nc(oc8C)c9nc(C(N)CCCNC(=N)N)sc9)sc%10)C(C)CC)C(C)CC)Cc%11ccccc%11
AWPD01	ORAL	Streptococcus pyogenes SP6-LAU	[u'RIBOSOMAL']	[u'CLASS_II_LANTIPEPTIDE']	5	121_["SALIVARICIN A"]	0.9375	CCC(C(C(NC(C(NC(C(NC(C(NC(C(NC(C(NC(C(NC(C(N1CCCC1C(NC(C(NC(C(NC(C(NC(C(NC(C(NC2CS3)=O)C(C)C)=O)Cc4ccccc4)=O)C(C)C)=O)CSCC(C(O)=O)NC2=O)=O)CC(N)=O)=O)=O)CS5)=O)CC(O)=O)=O)CC(O)=O)=O)C3C)=O)C(CC)C)=O)C5C)=O)C)=O)NC(C(NC(CNC(C(NC(CNC(C(NC(C(CCCCN)N)=O)CCCNC(N)=N)=O)=O)CO)=O)=O)CC6=CNc7c6cccc7)=O)C
CDTF01	CSF	Streptococcus suis	[u'RIBOSOMAL']	[u'CLASS_II_LANTIPEPTIDE']	2	88_["A-3802-VI-7"]	0.678571	O=C(O)CCC4NC(=O)C(NC(=O)C6NC(=O)C(NC(=O)C(NC(=O)C1NC(=O)C(NC(=O)C(NC(=O)CNC(=O)C(NC(=O)C(NC(=O)C)CSC1)CO)Cc3c[nH]c2ccccc23)C(C)C)C(C)SCC(NC4(=O))C(=O)NCC(=O)NC5C(=O)NC(C(=O)NC(C(=O)NC(C(=O)NC(C(=O)NC(C(=O)OC)CS(=O)C5(C))C)CSC6(C))C(C)CC)C(C)C)CC(C)C)C(C)CC
LELF01	ORAL	Paenibacillus sp. VT-400	[u'RIBOSOMAL']	[u'CLASS_III_IV_LANTIPEPTIDE']	1	106_["Lanthionine containing peptide","HYICIN M51"]	0.666667	O=C(N)CC5NC(=O)C(NC(=O)C(NC(=O)CNC(=O)C(=CC)NC(=O)C(NC(=O)C(NC(=O)C3NC(=O)CNC(=O)C4N(C(=O)C(NC(=O)C1NC(=O)C(NC(=O)C(NC(=O)C(=C)NC(=O)C(NC(=O)C(=CC)NC(=O)C(N)C(C)CC)CSC1)Cc2ccccc2)CC(C)C)C(C)SC3)CCC4)C)CCCCN)CSCC6NC(=O)C(NC(=O)C(NC5(=O))CSC=CNC6(=O))Cc7ccc(O)cc7)Cc8ccccc8
LELF01	ORAL	Paenibacillus sp. VT-400	[u'RIBOSOMAL']	[u'LASSO_PEPTIDE']	3	280_["Promothiocin A]	0.666667	O=C(NC(=C)C(=N)O)c3nc4c1nc(oc1C)C(N=C(O)c6nc(C(N=C(O)c2nc(oc2C)CN=C(O)C(N=C(O)c5nc(c4(cc3))sc5)C(C)C)C)sc6)C
AGVS01	RESPIRATORY	Burkholderia pseudomallei 354a	[u'RIBOSOMAL']	[u'LASSO_PEPTIDE']	8	561_["CAPISTRUIN"]	0.833333	O[C@H](C)[C@@H](C(N1CCC[C@H]1C(NCC(N[C@@H](CC2=CC=CC=C2)C(N[C@H](C(N[C@H](C(N3CCC[C@H]3C(N[C@@H](C4)C(N[C@@H](C)C(N[C@H](C(N[C@H](C(N[C@@H]([C@H](CC)C)C(N[C@H](C(N[C@H](C(N[C@@H](CC5=CC=CC=C5)C(NCC(N[C@@H](CC6=CC=CC=C6)C(N[C@H](C(O)=O)CC(N)=O)=O)=O)=O)=O)CCCNC(N)=N)=O)CO)=O)=O)C(C)C)=O)CCCNC(N)=N)=O)=O)=O)=O)[C@@H](C)O)=O)CCC(N)=O)=O)=O)=O)=O)NC(CNC4=O)=O
JQIZ01	EAR	Staphylococcus aureus	[u'RIBOSOMAL']	[u'BACTERIAL_HEAD_TO_TAIL_CYCLIZED']	2	276_["PRE-T","10381-T","PRE-10381-T"]	0.571429	O=C(N)c3nc4c1nc(oc1C)C(NC(=O)c6nc(C(NC(=O)c2nc(oc2C)CNC(=O)C(NC(=O)c5nc(c4(cc3))sc5)C(C)C)C)sc6)C
JQIZ01	EAR	Staphylococcus aureus	[u'RIBOSOMAL']	[u'CLASS_I_LANTIPEPTIDE']	6	105_["Lanthionine containing peptide","HYICIN M51"]	0.952381	O=C(N)CC5NC(=O)C(NC(=O)C(NC(=O)CNC(=O)C(=CC)NC(=O)C(NC(=O)C(NC(=O)C3NC(=O)CNC(=O)C4N(C(=O)C(NC(=O)C1NC(=O)C(NC(=O)C(=C)NC(=O)C(NC(=O)C(NC(=O)C(=CC)NC(=O)C(N)C(C)CC)CSC1)Cc2ccccc2)CC(C)C)C(C)SC3)CCC4)C)CCCCN)CSCC6NC(=O)C(NC(=O)C(NC5(=O))CSC=CNC6(=O))Cc7ccc(O)cc7)Cc8ccccc8
ANHU01	RESPIRATORY	Staphylococcus aureus subsp. aureus PSP1996	[u'RIBOSOMAL']	[u'CLASS_I_LANTIPEPTIDE']	3	105_["Lanthionine containing peptide","HYICIN M51"]	0.952381	O=C(N)CC5NC(=O)C(NC(=O)C(NC(=O)CNC(=O)C(=CC)NC(=O)C(NC(=O)C(NC(=O)C3NC(=O)CNC(=O)C4N(C(=O)C(NC(=O)C1NC(=O)C(NC(=O)C(=C)NC(=O)C(NC(=O)C(NC(=O)C(=CC)NC(=O)C(N)C(C)CC)CSC1)Cc2ccccc2)CC(C)C)C(C)SC3)CCC4)C)CCCCN)CSCC6NC(=O)C(NC(=O)C(NC5(=O))CSC=CNC6(=O))Cc7ccc(O)cc7)Cc8ccccc8
LNLT01	STOOL	Enterococcus faecium	[u'RIBOSOMAL']	[u'CLASS_II_BACTERIOCIN']	2	40_Enterocin A	1		MKHLKILSIKETQLIYGGTTHSGKYYGNGVYCTKNKCTVDWAKATTCIAGMSIGGFLGGAIPGKC
LNLT01	STOOL	Enterococcus faecium	[u'RIBOSOMAL']	[u'CLASS_II_BACTERIOCIN']	4	16_Bacteriocin T8	1		MKKKVLKHCVILGILGTCLAGIGTGIKVDAATYYGNGLYCNKEKCWVDWNQAKGEIGKIIVNGWVNHGPWAPRR
CEBB01	CSF	Streptococcus suis	[u'RIBOSOMAL']	[u'CLASS_II_LANTIPEPTIDE']	1	88_["A-3802-VI-7"]	0.678571	O=C(O)CCC4NC(=O)C(NC(=O)C6NC(=O)C(NC(=O)C(NC(=O)C1NC(=O)C(NC(=O)C(NC(=O)CNC(=O)C(NC(=O)C(NC(=O)C)CSC1)CO)Cc3c[nH]c2ccccc23)C(C)C)C(C)SCC(NC4(=O))C(=O)NCC(=O)NC5C(=O)NC(C(=O)NC(C(=O)NC(C(=O)NC(C(=O)NC(C(=O)OC)CS(=O)C5(C))C)CSC6(C))C(C)CC)C(C)C)CC(C)C)C(C)CC
JGPN01	URINE	Staphylococcus aureus DAR3790	[u'RIBOSOMAL']	[u'BACTERIAL_HEAD_TO_TAIL_CYCLIZED']	3	569_["XANTHOMONIN II"]	0.578947	CC(C)C[C@@H](C(N[C@@H](C)C(NCC(N[C@H](C(N[C@H](C(N[C@@H](CCSC)C(NCC(NCC(N[C@@H]([C@H](CC)C)C(N[C@H](C(N[C@H](C(O)=O)[C@@H](C)O)=O)[C@@H](C)O)=O)=O)=O)=O)=O)CCC(O)=O)=O)CC1)=O)=O)=O)NC([C@@H]2CCCN2C(CNC(CNC1=O)=O)=O)=O
AGLT01	ORAL	Streptococcus mutans TCI-227	[u'RIBOSOMAL']	[u'CLASS_II_BACTERIOCIN']	2	69_Antimicrobial protein BL-A60	0.545455		MNTRMMEQFETMDAETLSHVTGGGLYDGANGYAYRDSQGHWAYKVTKTPAQALTDVVVNSWASGAASFAAYA
CDWC01	CSF	Streptococcus suis	[u'RIBOSOMAL']	[u'CLASS_II_LANTIPEPTIDE']	1	88_["A-3802-VI-7"]	0.678571	O=C(O)CCC4NC(=O)C(NC(=O)C6NC(=O)C(NC(=O)C(NC(=O)C1NC(=O)C(NC(=O)C(NC(=O)CNC(=O)C(NC(=O)C(NC(=O)C)CSC1)CO)Cc3c[nH]c2ccccc23)C(C)C)C(C)SCC(NC4(=O))C(=O)NCC(=O)NC5C(=O)NC(C(=O)NC(C(=O)NC(C(=O)NC(C(=O)NC(C(=O)OC)CS(=O)C5(C))C)CSC6(C))C(C)CC)C(C)C)CC(C)C)C(C)CC
AHRO01	ORAL	Streptococcus mutans 11A1	[u'RIBOSOMAL']	[u'CLASS_II_BACTERIOCIN']	5	69_Antimicrobial protein BL-A60	0.545455		MLVDILTIKKGGIHMNTRMMEQFETMDAETLSHVTGGGLYDGANGYAYRDSQGHWAYKVTKTPAQALTDVVVNSWASGAASFAAYA
AUZA01	STOOL	Clostridium botulinum A2B7 92	[u'RIBOSOMAL']	[u'LINEAR_AZOLE_CONTAINING_PEPTIDE']	2	603_clostridiolysin_S	0.9	NC(CS)C1=NC(C2=NC(C3=NC(C4=NC(C5=NC(C6=NC(C7=NC(C8=NC(C(NC(C9=NC(C(NC(C%10=NC(C(NC(C(NCC(NCC(NCC%11=NC(C(NC(C)C%12=NC(C%13=NC(C(NCC(NCC(NCC(NC(C)C(NC(C)C(NC(C)C(NCC(NC(C(NCC(NCC(NC(C(O)=O)CC(N)=O)=O)=O)=O)CCC(N)=O)=O)=O)=O)=O)=O)=O)=O)=O)=C(C)O%13)=CO%12)=O)=CO%11)=O)=O)=O)C(C)C)=O)=CO%10)C(C)C)=O)=CO9)C(C)C)=O)=CS8)=CS7)=CS6)=CS5)=CO4)=CS3)=CS2)=CS1
ARXY01	SKIN	Staphylococcus aureus subsp. aureus 06BA18369	[u'RIBOSOMAL']	[u'BACTERIAL_HEAD_TO_TAIL_CYCLIZED']	2	569_["XANTHOMONIN II"]	0.578947	CC(C)C[C@@H](C(N[C@@H](C)C(NCC(N[C@H](C(N[C@H](C(N[C@@H](CCSC)C(NCC(NCC(N[C@@H]([C@H](CC)C)C(N[C@H](C(N[C@H](C(O)=O)[C@@H](C)O)=O)[C@@H](C)O)=O)=O)=O)=O)=O)CCC(O)=O)=O)CC1)=O)=O)=O)NC([C@@H]2CCCN2C(CNC(CNC1=O)=O)=O)=O
LFVL01	SKIN	Staphylococcus aureus subsp. aureus	[u'RIBOSOMAL']	[u'CLASS_I_LANTIPEPTIDE']	4	105_["Lanthionine containing peptide","HYICIN M51"]	0.952381	O=C(N)CC5NC(=O)C(NC(=O)C(NC(=O)CNC(=O)C(=CC)NC(=O)C(NC(=O)C(NC(=O)C3NC(=O)CNC(=O)C4N(C(=O)C(NC(=O)C1NC(=O)C(NC(=O)C(=C)NC(=O)C(NC(=O)C(NC(=O)C(=CC)NC(=O)C(N)C(C)CC)CSC1)Cc2ccccc2)CC(C)C)C(C)SC3)CCC4)C)CCCCN)CSCC6NC(=O)C(NC(=O)C(NC5(=O))CSC=CNC6(=O))Cc7ccc(O)cc7)Cc8ccccc8
LFTV01	NOSE	Staphylococcus aureus	[u'RIBOSOMAL']	[u'CLASS_I_LANTIPEPTIDE']	5	105_["Lanthionine containing peptide","HYICIN M51"]	0.904762	O=C(N)CC5NC(=O)C(NC(=O)C(NC(=O)CNC(=O)C(=CC)NC(=O)C(NC(=O)C(NC(=O)C3NC(=O)CNC(=O)C4N(C(=O)C(NC(=O)C1NC(=O)C(NC(=O)C(=C)NC(=O)C(NC(=O)C(NC(=O)C(=CC)NC(=O)C(N)C(C)CC)CSC1)Cc2ccccc2)CC(C)C)C(C)SC3)CCC4)C)CCCCN)CSCC6NC(=O)C(NC(=O)C(NC5(=O))CSC=CNC6(=O))Cc7ccc(O)cc7)Cc8ccccc8
ASQH01	URINE	Acinetobacter gyllenbergii MTCC 11365	[u'RIBOSOMAL']	[u'LASSO_PEPTIDE']	1	569_["XANTHOMONIN II"]	0.526316	CC(C)C[C@@H](C(N[C@@H](C)C(NCC(N[C@H](C(N[C@H](C(N[C@@H](CCSC)C(NCC(NCC(N[C@@H]([C@H](CC)C)C(N[C@H](C(N[C@H](C(O)=O)[C@@H](C)O)=O)[C@@H](C)O)=O)=O)=O)=O)=O)CCC(O)=O)=O)CC1)=O)=O)=O)NC([C@@H]2CCCN2C(CNC(CNC1=O)=O)=O)=O
CTEL01	SKIN	Staphylococcus capitis	[u'RIBOSOMAL']	[u'CLASS_I_LANTIPEPTIDE']	1	106_["Lanthionine containing peptide","HYICIN M51"]	0.666667	O=C(N)CC5NC(=O)C(NC(=O)C(NC(=O)CNC(=O)C(=CC)NC(=O)C(NC(=O)C(NC(=O)C3NC(=O)CNC(=O)C4N(C(=O)C(NC(=O)C1NC(=O)C(NC(=O)C(NC(=O)C(=C)NC(=O)C(NC(=O)C(=CC)NC(=O)C(N)C(C)CC)CSC1)Cc2ccccc2)CC(C)C)C(C)SC3)CCC4)C)CCCCN)CSCC6NC(=O)C(NC(=O)C(NC5(=O))CSC=CNC6(=O))Cc7ccc(O)cc7)Cc8ccccc8
LRHD01	SKIN	Streptococcus pyogenes	[u'RIBOSOMAL']	[u'LINEAR_AZOLE_CONTAINING_PEPTIDE']	2	600_["PLANTAZOLICIN B"]	0.789474	O=C(O)C(N=C(O)C1N=C(OC1(C))c2nc(oc2)c3nc(oc3)c4nc(oc4)c5nc(oc5)C(N=C(O)C(N=C(O)c6nc(oc6C)c7nc(oc7C)c%10nc(c8nc(oc8C)c9nc(C(N)CCCNC(=N)N)sc9)sc%10)C(C)CC)C(C)CC)Cc%11ccccc%11
LRHD01	SKIN	Streptococcus pyogenes	[u'RIBOSOMAL']	[u'CLASS_II_LANTIPEPTIDE']	3	121_["SALIVARICIN A"]	0.9375	CCC(C(C(NC(C(NC(C(NC(C(NC(C(NC(C(NC(C(NC(C(N1CCCC1C(NC(C(NC(C(NC(C(NC(C(NC(C(NC2CS3)=O)C(C)C)=O)Cc4ccccc4)=O)C(C)C)=O)CSCC(C(O)=O)NC2=O)=O)CC(N)=O)=O)=O)CS5)=O)CC(O)=O)=O)CC(O)=O)=O)C3C)=O)C(CC)C)=O)C5C)=O)C)=O)NC(C(NC(CNC(C(NC(CNC(C(NC(C(CCCCN)N)=O)CCCNC(N)=N)=O)=O)CO)=O)=O)CC6=CNc7c6cccc7)=O)C
LRHD01	SKIN	Streptococcus pyogenes	[u'RIBOSOMAL']	[u'CLASS_I_LANTIPEPTIDE']	5	124_["STREPTIN"]	1	CC(CC1NC(C(NC(C(NC(C(NC(CNC(C(C(C)C)N)=O)=O)CSCC(C(NC(C(N2CCCC2C(NCC(NC(C(NC(C(NC(C(NC(C(NC(C(NC3C(C)C)=O)CC(C)C)=O)CCCCN)=O)CC4=CNc5c4cccc5)=O)CS6)=O)CSCC(C(NC(C(N/C(C(N/C(C(N/C(C(NC(C(NC(C(O)=O)CCCCN)=O)C(C)C)=O)=C/C)=O)=C/C)=O)=C/C)=O)Cc7ccccc7)=O)NC3=O)=O)=O)=O)C6C)=O)NC1=O)=O)CCCNC(N)=N)=O)Cc8ccc(O)cc8)=O)C
JGTF01	RESPIRATORY	Staphylococcus aureus DAR1995	[u'RIBOSOMAL']	[u'BACTERIAL_HEAD_TO_TAIL_CYCLIZED']	3	569_["XANTHOMONIN II"]	0.578947	CC(C)C[C@@H](C(N[C@@H](C)C(NCC(N[C@H](C(N[C@H](C(N[C@@H](CCSC)C(NCC(NCC(N[C@@H]([C@H](CC)C)C(N[C@H](C(N[C@H](C(O)=O)[C@@H](C)O)=O)[C@@H](C)O)=O)=O)=O)=O)=O)CCC(O)=O)=O)CC1)=O)=O)=O)NC([C@@H]2CCCN2C(CNC(CNC1=O)=O)=O)=O
LRRM01	CSF	Nocardia brasiliensis	[u'RIBOSOMAL']	[u'CLASS_I_LANTIPEPTIDE']	17	174_planosporicin	0.909091	NC(C(N/C(C(NC(CSCC(NC1=O)C(NC2C(N3CCCC3C(NCC(NC(C(NC(C(O)C)C(NC(CSCC(N4)C(NC(CSCC(C=O)NC5=O)C(NC6CC7=CN=CN7)=O)=O)C(NC(CCC(O)=O)C(NCC(NCC(NCC(NC(CSCC5NC6=O)C(NCC4=O)=O)=O)=O)=O)=O)=O)=O)=O)CSC2C)=O)=O)=O)=O)C(NC(C(C)C)C(NC(C(NC1CC8=CNC9=C8C=CC=C9)=O)=C)=O)=O)=O)=C\C)=O)C(C)CC
LTMW01	RESPIRATORY	Staphylococcus sp. HMSC34H10	[u'RIBOSOMAL']	[u'BACTERIAL_HEAD_TO_TAIL_CYCLIZED']	2	569_["XANTHOMONIN II"]	0.578947	CC(C)C[C@@H](C(N[C@@H](C)C(NCC(N[C@H](C(N[C@H](C(N[C@@H](CCSC)C(NCC(NCC(N[C@@H]([C@H](CC)C)C(N[C@H](C(N[C@H](C(O)=O)[C@@H](C)O)=O)[C@@H](C)O)=O)=O)=O)=O)=O)CCC(O)=O)=O)CC1)=O)=O)=O)NC([C@@H]2CCCN2C(CNC(CNC1=O)=O)=O)=O
AEQQ01	ORAL	Streptococcus agalactiae ATCC 13813	[u'RIBOSOMAL']	[u'CLASS_I_LANTIPEPTIDE']	1	148_["NISIN U"]	0.941176	CCC(C(C(N/C(C(NC(C(NC(C(NC(C(NC1CC(C)C)=O)=C)=O)CCCCN)=O)CSCC(C(NC(C(N2CCCC2C(NCC(NC(C(NC(C(NC(C(NCC(NC(C(NC(C(NC(C(N/C(C(NC(C(N3CCCC3C(NC(C(NC(C(NC(C(NC(C(NC(C(NC(C(NCC(NC(C(NC(C(NC(C(NCC(O)=O)=O)Cc4ccccc4)=O)Cc5nc[nH]c5)=O)CS6)=O)=O)CS7)=O)C6C)=O)C)=O)C7C)=O)CCCCN)=O)CC(C)C)=O)=O)CS8)=O)=C\C)=O)CCSC)=O)CC(C)C)=O)C(CC)C)=O)=O)C8C)=O)CCCCN)=O)CS9)=O)=O)=O)C9C)=O)NC1=O)=O)=C\C)=O)N)C
AEQQ01	ORAL	Streptococcus agalactiae ATCC 13813	[u'RIBOSOMAL']	[u'CLASS_II_LANTIPEPTIDE', u'STREPTIDE']	2	129_["streptococcin A-M49"]	1	CCC(C(C(NC(C(NC(C(NC(C(NC(C(NC(C(NC(C(NC(C(NC1C(NC(C(NC(C(NC(C(NC(C(NC(C(N/C2=C\C)=O)C)=O)CC(C)C)=O)Cc3ccccc3)=O)C)=O)CC4=CNc5c4cccc5)=O)=O)CC(N)=O)=O)CC(C)C)=O)Cc6nc[nH]c6)=O)CS7)=O)CCC(O)=O)=O)Cc8nc[nH]c8)=O)CSCC(C(NC(C(NC(C(O)=O)=C)=O)CSC1C)=O)NC2=O)=O)NC(C(C7C)NC(C(NC(C(NC(C(C(C)C)NC(CNC(C(NC(C(NC(CN)=O)CCCCN)=O)CC(N)=O)=O)=O)=O)Cc9ccccc9)=O)CCCCN)=O)=O)C
JGTC01	RESPIRATORY	Staphylococcus aureus DAR1956	[u'RIBOSOMAL']	[u'BACTERIAL_HEAD_TO_TAIL_CYCLIZED']	3	595_Syanodin I	0.590909	CC(C[C@@H](C(N[C@H](C(NCC(O)=O)=O)C)=O)NC(CNC([C@@H](NC(CNC([C@@H](NC([C@@H]1CCCN1C([C@@H](NC([C@@H]2CC(NCC(N[C@H](C(N[C@H](C(NCC(NCC(N[C@H](C(N[C@H](C(N2)=O)C(C)C)=O)[C@H](O)C)=O)=O)=O)CO)=O)CC(C)C)=O)=O)=O)C)=O)=O)C)=O)=O)CCC(N)=O)=O)=O)C
CDSV01	CSF	Streptococcus suis	[u'RIBOSOMAL']	[u'CLASS_II_LANTIPEPTIDE']	2	88_["A-3802-VI-7"]	0.678571	O=C(O)CCC4NC(=O)C(NC(=O)C6NC(=O)C(NC(=O)C(NC(=O)C1NC(=O)C(NC(=O)C(NC(=O)CNC(=O)C(NC(=O)C(NC(=O)C)CSC1)CO)Cc3c[nH]c2ccccc23)C(C)C)C(C)SCC(NC4(=O))C(=O)NCC(=O)NC5C(=O)NC(C(=O)NC(C(=O)NC(C(=O)NC(C(=O)NC(C(=O)OC)CS(=O)C5(C))C)CSC6(C))C(C)CC)C(C)C)CC(C)C)C(C)CC
AHSO01	ORAL	Streptococcus mutans W6	[u'RIBOSOMAL']	[u'CLASS_II_LANTIPEPTIDE']	3	127_["VARIACIN"]	0.688889	CCC(C(C(NC(C(NC(C(NC(C(NC(C(NC(C(NC(C(NC(C(NC(C(NC(C(NC(C(NC(C(NC(C(NC(C(N/C1=C/C)=O)Cc2ccccc2)=O)C(C)C)=O)Cc3ccccc3)=O)CCC(N)=O)=O)Cc4ccccc4)=O)CSCC(C(NC(C(O)=O)=C)=O)NC5=O)=O)CC(N)=O)=O)CCSC)=O)Cc6nc[nH]c6)=O)CS7)=O)CCC(O)=O)=O)Cc8nc[nH]c8)=O)CSCC5NC1=O)=O)NC(C(C7C)NC(C9CCCN9C(C(C(CC)C)NC(C(C(C)C)NC(CNC(C(NC(CN)=O)=C)=O)=O)=O)=O)=O)=O)C
AHTC01	ORAL	Streptococcus mutans SM4	[u'RIBOSOMAL']	[u'CLASS_II_LANTIPEPTIDE']	2	127_["VARIACIN"]	0.688889	CCC(C(C(NC(C(NC(C(NC(C(NC(C(NC(C(NC(C(NC(C(NC(C(NC(C(NC(C(NC(C(NC(C(NC(C(N/C1=C/C)=O)Cc2ccccc2)=O)C(C)C)=O)Cc3ccccc3)=O)CCC(N)=O)=O)Cc4ccccc4)=O)CSCC(C(NC(C(O)=O)=C)=O)NC5=O)=O)CC(N)=O)=O)CCSC)=O)Cc6nc[nH]c6)=O)CS7)=O)CCC(O)=O)=O)Cc8nc[nH]c8)=O)CSCC5NC1=O)=O)NC(C(C7C)NC(C9CCCN9C(C(C(CC)C)NC(C(C(C)C)NC(CNC(C(NC(CN)=O)=C)=O)=O)=O)=O)=O)=O)C
AHTC01	ORAL	Streptococcus mutans SM4	[u'RIBOSOMAL']	[u'CLASS_II_BACTERIOCIN']	7	69_Antimicrobial protein BL-A60	0.545455		MLVDILTIKKGGIHMNTKMMKQFETMDAETLSHITGGGLYDGANGYAYRDSQGHWAYKVTKTPAQALTDVVVNSWASGAASFAAYA
LTMM01	SKIN	Staphylococcus sp. HMSC55F09	[u'RIBOSOMAL']	[u'BACTERIAL_HEAD_TO_TAIL_CYCLIZED']	3	569_["XANTHOMONIN II"]	0.578947	CC(C)C[C@@H](C(N[C@@H](C)C(NCC(N[C@H](C(N[C@H](C(N[C@@H](CCSC)C(NCC(NCC(N[C@@H]([C@H](CC)C)C(N[C@H](C(N[C@H](C(O)=O)[C@@H](C)O)=O)[C@@H](C)O)=O)=O)=O)=O)=O)CCC(O)=O)=O)CC1)=O)=O)=O)NC([C@@H]2CCCN2C(CNC(CNC1=O)=O)=O)=O
AHSH01	ORAL	Streptococcus mutans NLML4	[u'RIBOSOMAL']	[u'CLASS_II_LANTIPEPTIDE']	2	127_["VARIACIN"]	0.688889	CCC(C(C(NC(C(NC(C(NC(C(NC(C(NC(C(NC(C(NC(C(NC(C(NC(C(NC(C(NC(C(NC(C(NC(C(N/C1=C/C)=O)Cc2ccccc2)=O)C(C)C)=O)Cc3ccccc3)=O)CCC(N)=O)=O)Cc4ccccc4)=O)CSCC(C(NC(C(O)=O)=C)=O)NC5=O)=O)CC(N)=O)=O)CCSC)=O)Cc6nc[nH]c6)=O)CS7)=O)CCC(O)=O)=O)Cc8nc[nH]c8)=O)CSCC5NC1=O)=O)NC(C(C7C)NC(C9CCCN9C(C(C(CC)C)NC(C(C(C)C)NC(CNC(C(NC(CN)=O)=C)=O)=O)=O)=O)=O)=O)C
JSOR01	URINE	Escherichia coli	[u'RIBOSOMAL']	[u'LINEAR_AZOLE_CONTAINING_PEPTIDE']	2	601_["MccB17","MICROCIN B17","MICROCIN 17W"]	1	O=C(O)C(N=C(O)C(N=C(O)C(N=C(O)CN=C(O)c1nc(oc1)CN=C(O)CN=C(O)c2nc(oc2)CN=C(O)CN=C(O)C(N=C(O)CN=C(O)CN=C(O)c3nc(oc3)c8nc(CN=C(O)C(N=C(O)C(N=C(O)c7nc(CN=C(O)CN=C(O)c6nc(CN=C(O)CN=C(O)CN=C(O)C(N=C(O)CN=C(O)CN=C(O)c5nc(c4nc(oc4)CN=C(O)CN=C(O)CN=C(O)CN=C(O)CN=C(O)CN=C(O)CN=C(O)CN=C(O)CN=C(O)CN=C(O)C(N=C(O)CN=C(O)C(N)C(C)C)C(C)CC)sc5)CCC(=N)O)sc6)sc7)CO)CC(=N)O)sc8)CC(=N)O)CO)Cc9cnc[nH]9)C(C)CC
AGMD01	ORAL	Streptococcus mutans TCI-264	[u'RIBOSOMAL']	[u'CLASS_II_BACTERIOCIN']	2	69_Antimicrobial protein BL-A60	0.545455		MNTKMMEQFETMDAETLSHVTGGGLYDGANGYAYRDSQGHWAYKVTKTPAQALTDVVVNSWASGAASFAAYA
CDUA01	CSF	Streptococcus suis	[u'RIBOSOMAL']	[u'CLASS_II_LANTIPEPTIDE']	2	88_["A-3802-VI-7"]	0.678571	O=C(O)CCC4NC(=O)C(NC(=O)C6NC(=O)C(NC(=O)C(NC(=O)C1NC(=O)C(NC(=O)C(NC(=O)CNC(=O)C(NC(=O)C(NC(=O)C)CSC1)CO)Cc3c[nH]c2ccccc23)C(C)C)C(C)SCC(NC4(=O))C(=O)NCC(=O)NC5C(=O)NC(C(=O)NC(C(=O)NC(C(=O)NC(C(=O)NC(C(=O)OC)CS(=O)C5(C))C)CSC6(C))C(C)CC)C(C)C)CC(C)C)C(C)CC
JGIZ01	ORAL	Staphylococcus aureus F42580	[u'RIBOSOMAL']	[u'BACTERIAL_HEAD_TO_TAIL_CYCLIZED']	2	595_Syanodin I	0.590909	CC(C[C@@H](C(N[C@H](C(NCC(O)=O)=O)C)=O)NC(CNC([C@@H](NC(CNC([C@@H](NC([C@@H]1CCCN1C([C@@H](NC([C@@H]2CC(NCC(N[C@H](C(N[C@H](C(NCC(NCC(N[C@H](C(N[C@H](C(N2)=O)C(C)C)=O)[C@H](O)C)=O)=O)=O)CO)=O)CC(C)C)=O)=O)=O)C)=O)=O)C)=O)=O)CCC(N)=O)=O)=O)C
LVYN01	ORAL	Streptococcus pyogenes	[u'RIBOSOMAL']	[u'CLASS_I_LANTIPEPTIDE']	2	124_["STREPTIN"]	1	CC(CC1NC(C(NC(C(NC(C(NC(CNC(C(C(C)C)N)=O)=O)CSCC(C(NC(C(N2CCCC2C(NCC(NC(C(NC(C(NC(C(NC(C(NC(C(NC3C(C)C)=O)CC(C)C)=O)CCCCN)=O)CC4=CNc5c4cccc5)=O)CS6)=O)CSCC(C(NC(C(N/C(C(N/C(C(N/C(C(NC(C(NC(C(O)=O)CCCCN)=O)C(C)C)=O)=C/C)=O)=C/C)=O)=C/C)=O)Cc7ccccc7)=O)NC3=O)=O)=O)=O)C6C)=O)NC1=O)=O)CCCNC(N)=N)=O)Cc8ccc(O)cc8)=O)C
LVYN01	ORAL	Streptococcus pyogenes	[u'RIBOSOMAL']	[u'LINEAR_AZOLE_CONTAINING_PEPTIDE']	3	600_["PLANTAZOLICIN B"]	0.789474	O=C(O)C(N=C(O)C1N=C(OC1(C))c2nc(oc2)c3nc(oc3)c4nc(oc4)c5nc(oc5)C(N=C(O)C(N=C(O)c6nc(oc6C)c7nc(oc7C)c%10nc(c8nc(oc8C)c9nc(C(N)CCCNC(=N)N)sc9)sc%10)C(C)CC)C(C)CC)Cc%11ccccc%11
LVYN01	ORAL	Streptococcus pyogenes	[u'RIBOSOMAL']	[u'CLASS_II_LANTIPEPTIDE']	4	121_["SALIVARICIN A"]	0.9375	CCC(C(C(NC(C(NC(C(NC(C(NC(C(NC(C(NC(C(NC(C(N1CCCC1C(NC(C(NC(C(NC(C(NC(C(NC(C(NC2CS3)=O)C(C)C)=O)Cc4ccccc4)=O)C(C)C)=O)CSCC(C(O)=O)NC2=O)=O)CC(N)=O)=O)=O)CS5)=O)CC(O)=O)=O)CC(O)=O)=O)C3C)=O)C(CC)C)=O)C5C)=O)C)=O)NC(C(NC(CNC(C(NC(CNC(C(NC(C(CCCCN)N)=O)CCCNC(N)=N)=O)=O)CO)=O)=O)CC6=CNc7c6cccc7)=O)C
AFQC01	ORAL	Actinomyces sp. oral taxon 448 str. F0400	[u'RIBOSOMAL']	[u'CLASS_II_LANTIPEPTIDE']	1	126_["Butyrivibriocin OR79"]	0.844444	CCC(C(C(NC(C(N/C(C(NC(C(NC(C(NC(C(O)=O)=C)=O)CS1)=O)CSC2)=O)=C/C)=O)Cc3ccccc3)=O)NC(C(NC(C(NC(C(NC(C(C1C)NC(C(NC(C(NC(C(NC(C(NC(C(NC(C(NC(C2NC(C(C(CC)C)NC(C4NC(C(NC(C(C(CC)C)NC(C(C(C)C)NC(CNC(C(NC(CN)=O)CC(N)=O)=O)=O)=O)=O)CCCCN)=O)=O)=O)=O)Cc5nc[nH]c5)=O)CCC(O)=O)=O)CSC4C)=O)Cc6nc[nH]c6)=O)CCSC)=O)CC(N)=O)=O)=O)CC7=CNc8c7cccc8)=O)CCC(N)=O)=O)Cc9ccccc9)=O)C
LTMB01	SKIN	Staphylococcus sp. HMSC66A04	[u'RIBOSOMAL']	[u'CLASS_I_LANTIPEPTIDE']	4	105_["Lanthionine containing peptide","HYICIN M51"]	0.952381	O=C(N)CC5NC(=O)C(NC(=O)C(NC(=O)CNC(=O)C(=CC)NC(=O)C(NC(=O)C(NC(=O)C3NC(=O)CNC(=O)C4N(C(=O)C(NC(=O)C1NC(=O)C(NC(=O)C(=C)NC(=O)C(NC(=O)C(NC(=O)C(=CC)NC(=O)C(N)C(C)CC)CSC1)Cc2ccccc2)CC(C)C)C(C)SC3)CCC4)C)CCCCN)CSCC6NC(=O)C(NC(=O)C(NC5(=O))CSC=CNC6(=O))Cc7ccc(O)cc7)Cc8ccccc8
AHRS01	ORAL	Streptococcus mutans 2VS1	[u'RIBOSOMAL']	[u'CLASS_II_LANTIPEPTIDE']	5	127_["VARIACIN"]	0.688889	CCC(C(C(NC(C(NC(C(NC(C(NC(C(NC(C(NC(C(NC(C(NC(C(NC(C(NC(C(NC(C(NC(C(NC(C(N/C1=C/C)=O)Cc2ccccc2)=O)C(C)C)=O)Cc3ccccc3)=O)CCC(N)=O)=O)Cc4ccccc4)=O)CSCC(C(NC(C(O)=O)=C)=O)NC5=O)=O)CC(N)=O)=O)CCSC)=O)Cc6nc[nH]c6)=O)CS7)=O)CCC(O)=O)=O)Cc8nc[nH]c8)=O)CSCC5NC1=O)=O)NC(C(C7C)NC(C9CCCN9C(C(C(CC)C)NC(C(C(C)C)NC(CNC(C(NC(CN)=O)=C)=O)=O)=O)=O)=O)=O)C
CDXI01	CSF	Streptococcus suis	[u'RIBOSOMAL']	[u'CLASS_II_LANTIPEPTIDE']	2	88_["A-3802-VI-7"]	0.678571	O=C(O)CCC4NC(=O)C(NC(=O)C6NC(=O)C(NC(=O)C(NC(=O)C1NC(=O)C(NC(=O)C(NC(=O)CNC(=O)C(NC(=O)C(NC(=O)C)CSC1)CO)Cc3c[nH]c2ccccc23)C(C)C)C(C)SCC(NC4(=O))C(=O)NCC(=O)NC5C(=O)NC(C(=O)NC(C(=O)NC(C(=O)NC(C(=O)NC(C(=O)OC)CS(=O)C5(C))C)CSC6(C))C(C)CC)C(C)C)CC(C)C)C(C)CC
AGKJ01	ORAL	Streptococcus mutans TCI-116	[u'RIBOSOMAL']	[u'CLASS_II_BACTERIOCIN']	2	69_Antimicrobial protein BL-A60	0.545455		MNTKMMEQFETMDAETLSHVTGGGLYDGANGYAYRDSQGHWAYKVTKTPAQALTDVVVNSWASGAASFAAYA
AGMT01	ORAL	Streptococcus mutans TCI-75	[u'RIBOSOMAL']	[u'CLASS_II_BACTERIOCIN']	3	69_Antimicrobial protein BL-A60	0.545455		MNTKMMEQFETMDAETLSHVTGGGLYDGANGYAYRDSQGHWAYKVTKTPAQALTDVVVNSWASGAASFAAYA
LTLO01	EYE	Staphylococcus sp. HMSC74G05	[u'RIBOSOMAL']	[u'CLASS_I_LANTIPEPTIDE']	4	105_["Lanthionine containing peptide","HYICIN M51"]	0.952381	O=C(N)CC5NC(=O)C(NC(=O)C(NC(=O)CNC(=O)C(=CC)NC(=O)C(NC(=O)C(NC(=O)C3NC(=O)CNC(=O)C4N(C(=O)C(NC(=O)C1NC(=O)C(NC(=O)C(=C)NC(=O)C(NC(=O)C(NC(=O)C(=CC)NC(=O)C(N)C(C)CC)CSC1)Cc2ccccc2)CC(C)C)C(C)SC3)CCC4)C)CCCCN)CSCC6NC(=O)C(NC(=O)C(NC5(=O))CSC=CNC6(=O))Cc7ccc(O)cc7)Cc8ccccc8
LTLO01	EYE	Staphylococcus sp. HMSC74G05	[u'RIBOSOMAL']	[u'BACTERIAL_HEAD_TO_TAIL_CYCLIZED']	6	595_Syanodin I	0.590909	CC(C[C@@H](C(N[C@H](C(NCC(O)=O)=O)C)=O)NC(CNC([C@@H](NC(CNC([C@@H](NC([C@@H]1CCCN1C([C@@H](NC([C@@H]2CC(NCC(N[C@H](C(N[C@H](C(NCC(NCC(N[C@H](C(N[C@H](C(N2)=O)C(C)C)=O)[C@H](O)C)=O)=O)=O)CO)=O)CC(C)C)=O)=O)=O)C)=O)=O)C)=O)=O)CCC(N)=O)=O)=O)C
CAET01	STOOL	Bacillus timonensis	[u'RIBOSOMAL']	[u'LASSO_PEPTIDE']	4	644_[Mechercharstatin_A,IB_01211,MECHERCHARMYCIN_A,MECHERCHASTATIN]	0.625	O=C(NC(C(CC)C)C(NC(C(C)C)C(NCc1occ(c2occ(c3occ(c4scc5n4)n3)n2)n1)=O)=O)c6c(c7ccccc7)oc5n6
LWQK01	VAGINA	Streptococcus sp. HMSC072D03	[u'RIBOSOMAL']	[u'CLASS_I_LANTIPEPTIDE']	1	124_["STREPTIN"]	1	CC(CC1NC(C(NC(C(NC(C(NC(CNC(C(C(C)C)N)=O)=O)CSCC(C(NC(C(N2CCCC2C(NCC(NC(C(NC(C(NC(C(NC(C(NC(C(NC3C(C)C)=O)CC(C)C)=O)CCCCN)=O)CC4=CNc5c4cccc5)=O)CS6)=O)CSCC(C(NC(C(N/C(C(N/C(C(N/C(C(NC(C(NC(C(O)=O)CCCCN)=O)C(C)C)=O)=C/C)=O)=C/C)=O)=C/C)=O)Cc7ccccc7)=O)NC3=O)=O)=O)=O)C6C)=O)NC1=O)=O)CCCNC(N)=N)=O)Cc8ccc(O)cc8)=O)C
CDVU01	CSF	Streptococcus suis	[u'RIBOSOMAL']	[u'CLASS_II_LANTIPEPTIDE']	1	88_["A-3802-VI-7"]	0.678571	O=C(O)CCC4NC(=O)C(NC(=O)C6NC(=O)C(NC(=O)C(NC(=O)C1NC(=O)C(NC(=O)C(NC(=O)CNC(=O)C(NC(=O)C(NC(=O)C)CSC1)CO)Cc3c[nH]c2ccccc23)C(C)C)C(C)SCC(NC4(=O))C(=O)NCC(=O)NC5C(=O)NC(C(=O)NC(C(=O)NC(C(=O)NC(C(=O)NC(C(=O)OC)CS(=O)C5(C))C)CSC6(C))C(C)CC)C(C)C)CC(C)C)C(C)CC
JXMY01	STOOL	Clostridium botulinum	[u'RIBOSOMAL']	[u'LINEAR_AZOLE_CONTAINING_PEPTIDE']	2	603_clostridiolysin_S	0.9	NC(CS)C1=NC(C2=NC(C3=NC(C4=NC(C5=NC(C6=NC(C7=NC(C8=NC(C(NC(C9=NC(C(NC(C%10=NC(C(NC(C(NCC(NCC(NCC%11=NC(C(NC(C)C%12=NC(C%13=NC(C(NCC(NCC(NCC(NC(C)C(NC(C)C(NC(C)C(NCC(NC(C(NCC(NCC(NC(C(O)=O)CC(N)=O)=O)=O)=O)CCC(N)=O)=O)=O)=O)=O)=O)=O)=O)=O)=C(C)O%13)=CO%12)=O)=CO%11)=O)=O)=O)C(C)C)=O)=CO%10)C(C)C)=O)=CO9)C(C)C)=O)=CS8)=CS7)=CS6)=CS5)=CO4)=CS3)=CS2)=CS1
AGMV01	ORAL	Streptococcus mutans TCI-82	[u'RIBOSOMAL']	[u'CLASS_II_BACTERIOCIN']	2	69_Antimicrobial protein BL-A60	0.545455		MNTKMMEQFETMDAETLSHVTGGGLYDGANGYAYRDSQGHWAYKVTKTPAQALTDVVVNSWASGAASFAAYA
JGPP01	URINE	Staphylococcus aureus DAR3796	[u'RIBOSOMAL']	[u'BACTERIAL_HEAD_TO_TAIL_CYCLIZED']	2	595_Syanodin I	0.590909	CC(C[C@@H](C(N[C@H](C(NCC(O)=O)=O)C)=O)NC(CNC([C@@H](NC(CNC([C@@H](NC([C@@H]1CCCN1C([C@@H](NC([C@@H]2CC(NCC(N[C@H](C(N[C@H](C(NCC(NCC(N[C@H](C(N[C@H](C(N2)=O)C(C)C)=O)[C@H](O)C)=O)=O)=O)CO)=O)CC(C)C)=O)=O)=O)C)=O)=O)C)=O)=O)CCC(N)=O)=O)=O)C
LRGZ01	SKIN	Streptococcus pyogenes	[u'RIBOSOMAL']	[u'LINEAR_AZOLE_CONTAINING_PEPTIDE']	1	600_["PLANTAZOLICIN B"]	0.789474	O=C(O)C(N=C(O)C1N=C(OC1(C))c2nc(oc2)c3nc(oc3)c4nc(oc4)c5nc(oc5)C(N=C(O)C(N=C(O)c6nc(oc6C)c7nc(oc7C)c%10nc(c8nc(oc8C)c9nc(C(N)CCCNC(=N)N)sc9)sc%10)C(C)CC)C(C)CC)Cc%11ccccc%11
LRGZ01	SKIN	Streptococcus pyogenes	[u'RIBOSOMAL']	[u'CLASS_II_LANTIPEPTIDE']	3	121_["SALIVARICIN A"]	0.9375	CCC(C(C(NC(C(NC(C(NC(C(NC(C(NC(C(NC(C(NC(C(N1CCCC1C(NC(C(NC(C(NC(C(NC(C(NC(C(NC2CS3)=O)C(C)C)=O)Cc4ccccc4)=O)C(C)C)=O)CSCC(C(O)=O)NC2=O)=O)CC(N)=O)=O)=O)CS5)=O)CC(O)=O)=O)CC(O)=O)=O)C3C)=O)C(CC)C)=O)C5C)=O)C)=O)NC(C(NC(CNC(C(NC(CNC(C(NC(C(CCCCN)N)=O)CCCNC(N)=N)=O)=O)CO)=O)=O)CC6=CNc7c6cccc7)=O)C
AHRI01	ORAL	Streptococcus mutans OMZ175	[u'RIBOSOMAL']	[u'CLASS_II_BACTERIOCIN']	5	69_Antimicrobial protein BL-A60	0.545455		MNTKMMEQFETMDTETLSHVTGGGLYDGANGYAYRDSQGHWAYKVTKTPAQALTDVVVNSWASGAASFAAYA
CEBP01	CSF	Streptococcus suis	[u'RIBOSOMAL']	[u'CLASS_II_LANTIPEPTIDE']	2	88_["A-3802-VI-7"]	0.678571	O=C(O)CCC4NC(=O)C(NC(=O)C6NC(=O)C(NC(=O)C(NC(=O)C1NC(=O)C(NC(=O)C(NC(=O)CNC(=O)C(NC(=O)C(NC(=O)C)CSC1)CO)Cc3c[nH]c2ccccc23)C(C)C)C(C)SCC(NC4(=O))C(=O)NCC(=O)NC5C(=O)NC(C(=O)NC(C(=O)NC(C(=O)NC(C(=O)NC(C(=O)OC)CS(=O)C5(C))C)CSC6(C))C(C)CC)C(C)C)CC(C)C)C(C)CC
CEBP01	CSF	Streptococcus suis	[u'RIBOSOMAL']	[u'CLASS_II_LANTIPEPTIDE']	3	129_["streptococcin A-M49"]	1	CCC(C(C(NC(C(NC(C(NC(C(NC(C(NC(C(NC(C(NC(C(NC1C(NC(C(NC(C(NC(C(NC(C(NC(C(N/C2=C\C)=O)C)=O)CC(C)C)=O)Cc3ccccc3)=O)C)=O)CC4=CNc5c4cccc5)=O)=O)CC(N)=O)=O)CC(C)C)=O)Cc6nc[nH]c6)=O)CS7)=O)CCC(O)=O)=O)Cc8nc[nH]c8)=O)CSCC(C(NC(C(NC(C(O)=O)=C)=O)CSC1C)=O)NC2=O)=O)NC(C(C7C)NC(C(NC(C(NC(C(C(C)C)NC(CNC(C(NC(C(NC(CN)=O)CCCCN)=O)CC(N)=O)=O)=O)=O)Cc9ccccc9)=O)CCCCN)=O)=O)C
LTMP01	SKIN	Staphylococcus sp. HMSC36F05	[u'RIBOSOMAL']	[u'BACTERIAL_HEAD_TO_TAIL_CYCLIZED']	2	595_Syanodin I	0.590909	CC(C[C@@H](C(N[C@H](C(NCC(O)=O)=O)C)=O)NC(CNC([C@@H](NC(CNC([C@@H](NC([C@@H]1CCCN1C([C@@H](NC([C@@H]2CC(NCC(N[C@H](C(N[C@H](C(NCC(NCC(N[C@H](C(N[C@H](C(N2)=O)C(C)C)=O)[C@H](O)C)=O)=O)=O)CO)=O)CC(C)C)=O)=O)=O)C)=O)=O)C)=O)=O)CCC(N)=O)=O)=O)C
LZDT01	STOOL	Lactobacillus gasseri	[u'RIBOSOMAL']	[u'CLASS_II_BACTERIOCIN']	1	4_Bacteriocin lactacin F	0.604167		MKNFNTLSFETLANIVGGRNNWAANIGGVGGATVAGWALGNAVCGPACGFVGAHYVPIAWAGVTAATGGFGKIRK
ALYU01	ORAL	Streptococcus mutans B09Sm1	[u'RIBOSOMAL']	[u'CLASS_II_LANTIPEPTIDE']	2	127_["VARIACIN"]	0.688889	CCC(C(C(NC(C(NC(C(NC(C(NC(C(NC(C(NC(C(NC(C(NC(C(NC(C(NC(C(NC(C(NC(C(NC(C(N/C1=C/C)=O)Cc2ccccc2)=O)C(C)C)=O)Cc3ccccc3)=O)CCC(N)=O)=O)Cc4ccccc4)=O)CSCC(C(NC(C(O)=O)=C)=O)NC5=O)=O)CC(N)=O)=O)CCSC)=O)Cc6nc[nH]c6)=O)CS7)=O)CCC(O)=O)=O)Cc8nc[nH]c8)=O)CSCC5NC1=O)=O)NC(C(C7C)NC(C9CCCN9C(C(C(CC)C)NC(C(C(C)C)NC(CNC(C(NC(CN)=O)=C)=O)=O)=O)=O)=O)=O)C
JGSM01	RESPIRATORY	Staphylococcus aureus DAR1842	[u'RIBOSOMAL']	[u'BACTERIAL_HEAD_TO_TAIL_CYCLIZED']	3	595_Syanodin I	0.590909	CC(C[C@@H](C(N[C@H](C(NCC(O)=O)=O)C)=O)NC(CNC([C@@H](NC(CNC([C@@H](NC([C@@H]1CCCN1C([C@@H](NC([C@@H]2CC(NCC(N[C@H](C(N[C@H](C(NCC(NCC(N[C@H](C(N[C@H](C(N2)=O)C(C)C)=O)[C@H](O)C)=O)=O)=O)CO)=O)CC(C)C)=O)=O)=O)C)=O)=O)C)=O)=O)CCC(N)=O)=O)=O)C
AFBS01	GI	Enterococcus faecalis TX1467	[u'RIBOSOMAL']	[u'CLASS_II_LANTIPEPTIDE']	4	138_["Cytolysin LL"]	1	NC(C(N/C(C(N1CCCC1C(NC(C(NC(CS2)C(NC(C)C(NC(C(NC(C)C(NC(C)C(N/C(C(NC(C)C(NC(C)C(NC(C)C(NC(C(NC(C(NC(C)C(NC3C)=O)=O)=C)=O)CSCC(C(NCC(NC(CC4=CNC5=C4C=CC=C5)C(NC(C(NCC(NCC(NCC(NC(C(CC)C)C(NC(CC6=CC=CC=C6)C(NC(C(NCC(NC(C(N/C(C(NC(C(NC(C(NC(C(NC(C(NC(C(NC(C(NC7CC8=CN=CN8)=O)CCCCN)=O)CC(C)C)=O)CSCC(C(O)=O)NC7=O)=O)C(C)C)=O)C(C)C)=O)C(C)C)=O)=C/C)=O)C(C)C)=O)=O)C(C)O)=O)=O)=O)=O)=O)=O)C(C)C)=O)=O)=O)NC3…
JNQN01	STOOL	Escherichia coli 2-222-05_S3_C3	[u'RIBOSOMAL']	[u'LASSO_PEPTIDE']	4	563_["LARIATIN A"]	0.608696	OC[C@@H](C(N[C@H](C(N[C@H](C(N[C@H](C(N[C@@H](CC1=CC=C(C=C1)O)C(N[C@H](C(N[C@H](C(N[C@@H](CC2=CNC3=C2C=CC=C3)C(N[C@H](C(NCC(N[C@@H](CC4=CN=CN4)C(N[C@H](C(N[C@H](C(N[C@H](C(N[C@@H]([C@H](CC)C)C(N[C@H](C(N5CCC[C@H]5C(O)=O)=O)CCCCN)=O)=O)C(C)C)=O)CC(N)=O)=O)CO)=O)=O)=O)C(C)C)=O)=O)CC6)=O)CCCNC(N)=N)=O)=O)C(C)C)=O)CC(C)C)=O)CCC(N)=O)=O)NC(CNC6=O)=O
AHRJ01	ORAL	Streptococcus mutans 15JP3	[u'RIBOSOMAL']	[u'CLASS_II_BACTERIOCIN']	4	69_Antimicrobial protein BL-A60	0.545455		MLVDILTIKKGGIHMNTRMMEQFETMDAETLSHVTGGGLYDGANGYAYRDSQGHWAYKVTKTPAQALTDVVVNSWASGAASFAAYA
LTNL01	VAGINA	Staphylococcus sp. HMSC061G12	[u'RIBOSOMAL']	[u'CLASS_I_LANTIPEPTIDE']	1	161_["Avermipeptin"]	0.648649	NCC(NCC(NCC(N[C@@H](C)C(N[C@H](C(N/C(C(N[C@H]1C(C)C)=O)=C\C)=O)C[C@](CSC[C@@H](C(N[C@H](C(N[C@H](C(N[C@@H](C)C(N[C@H]2C)=O)=O)C[C@](CSC[C@@H](C(N[C@H](C(O)=O)CC(C)C)=O)NC3=O)(C(N[C@H](C(N[C@H](C(N[C@H]3CC(C)C)=O)CC(C)C)=O)C(C)C)=O)NC2=O)=O)C(C)C)=O)NC4=O)(C(N[C@H](C(N[C@H](C(NC4=C)=O)CC(C)C)=O)CC(C)C)=O)NC1=O)=O)=O)=O)=O
CDUE01	CSF	Streptococcus suis	[u'RIBOSOMAL']	[u'CLASS_II_LANTIPEPTIDE']	1	88_["A-3802-VI-7"]	0.678571	O=C(O)CCC4NC(=O)C(NC(=O)C6NC(=O)C(NC(=O)C(NC(=O)C1NC(=O)C(NC(=O)C(NC(=O)CNC(=O)C(NC(=O)C(NC(=O)C)CSC1)CO)Cc3c[nH]c2ccccc23)C(C)C)C(C)SCC(NC4(=O))C(=O)NCC(=O)NC5C(=O)NC(C(=O)NC(C(=O)NC(C(=O)NC(C(=O)NC(C(=O)OC)CS(=O)C5(C))C)CSC6(C))C(C)CC)C(C)C)CC(C)C)C(C)CC
AMAU01	SKIN	Enterococcus faecium ERV168	[u'RIBOSOMAL']	[u'CLASS_II_BACTERIOCIN']	2	40_Enterocin A	1		MKHLKILSIKETQLIYGGTTHSGKYYGNGVYCTKNKCTVDWAKATTCIAGMSIGGFLGGAIPGKC
AGLD01	ORAL	Streptococcus mutans TCI-177	[u'RIBOSOMAL']	[u'CLASS_II_BACTERIOCIN']	3	69_Antimicrobial protein BL-A60	0.545455		MNTKMMEQFETMDAETLSHVTGGGLYDGANGYAYRDSQGHWAYKVTKTPAQALTDVVVNSWASGAASFAAYA
ALYW01	ORAL	Streptococcus mutans B102SM-B	[u'RIBOSOMAL']	[u'CLASS_II_BACTERIOCIN']	6	69_Antimicrobial protein BL-A60	0.545455		MLVDILTIKKGGIHMNTRMMEQFETMDAETLSHVTGGGLYDGANGYAYRDSQGHWAYKVTKTPAQALTDVVVNSWASGAASFAAYA
AHTB01	ORAL	Streptococcus mutans B	[u'RIBOSOMAL']	[u'CLASS_II_LANTIPEPTIDE']	1	127_["VARIACIN"]	0.688889	CCC(C(C(NC(C(NC(C(NC(C(NC(C(NC(C(NC(C(NC(C(NC(C(NC(C(NC(C(NC(C(NC(C(NC(C(N/C1=C/C)=O)Cc2ccccc2)=O)C(C)C)=O)Cc3ccccc3)=O)CCC(N)=O)=O)Cc4ccccc4)=O)CSCC(C(NC(C(O)=O)=C)=O)NC5=O)=O)CC(N)=O)=O)CCSC)=O)Cc6nc[nH]c6)=O)CS7)=O)CCC(O)=O)=O)Cc8nc[nH]c8)=O)CSCC5NC1=O)=O)NC(C(C7C)NC(C9CCCN9C(C(C(CC)C)NC(C(C(C)C)NC(CNC(C(NC(CN)=O)=C)=O)=O)=O)=O)=O)=O)C
CEBI01	CSF	Streptococcus suis	[u'RIBOSOMAL']	[u'CLASS_II_LANTIPEPTIDE']	1	88_["A-3802-VI-7"]	0.678571	O=C(O)CCC4NC(=O)C(NC(=O)C6NC(=O)C(NC(=O)C(NC(=O)C1NC(=O)C(NC(=O)C(NC(=O)CNC(=O)C(NC(=O)C(NC(=O)C)CSC1)CO)Cc3c[nH]c2ccccc23)C(C)C)C(C)SCC(NC4(=O))C(=O)NCC(=O)NC5C(=O)NC(C(=O)NC(C(=O)NC(C(=O)NC(C(=O)NC(C(=O)OC)CS(=O)C5(C))C)CSC6(C))C(C)CC)C(C)C)CC(C)C)C(C)CC
CDYB01	CSF	Streptococcus suis	[u'RIBOSOMAL']	[u'CLASS_II_LANTIPEPTIDE']	1	88_["A-3802-VI-7"]	0.678571	O=C(O)CCC4NC(=O)C(NC(=O)C6NC(=O)C(NC(=O)C(NC(=O)C1NC(=O)C(NC(=O)C(NC(=O)CNC(=O)C(NC(=O)C(NC(=O)C)CSC1)CO)Cc3c[nH]c2ccccc23)C(C)C)C(C)SCC(NC4(=O))C(=O)NCC(=O)NC5C(=O)NC(C(=O)NC(C(=O)NC(C(=O)NC(C(=O)NC(C(=O)OC)CS(=O)C5(C))C)CSC6(C))C(C)CC)C(C)C)CC(C)C)C(C)CC
LOMH01	STOOL	Lactobacillus plantarum	[u'RIBOSOMAL']	[u'CLASS_II_BACTERIOCIN']	2	70_Plantaricin A	1		MKIKLTVLNEFEELTADAEKNISGGRRSRKNGIGYAIGYAFGAVERAVLGGSRDYNK
JFAU01	NOSE	Staphylococcus aureus subsp. aureus	[u'RIBOSOMAL']	[u'CLASS_I_LANTIPEPTIDE']	3	105_["Lanthionine containing peptide","HYICIN M51"]	0.952381	O=C(N)CC5NC(=O)C(NC(=O)C(NC(=O)CNC(=O)C(=CC)NC(=O)C(NC(=O)C(NC(=O)C3NC(=O)CNC(=O)C4N(C(=O)C(NC(=O)C1NC(=O)C(NC(=O)C(=C)NC(=O)C(NC(=O)C(NC(=O)C(=CC)NC(=O)C(N)C(C)CC)CSC1)Cc2ccccc2)CC(C)C)C(C)SC3)CCC4)C)CCCCN)CSCC6NC(=O)C(NC(=O)C(NC5(=O))CSC=CNC6(=O))Cc7ccc(O)cc7)Cc8ccccc8
LTHI01	RESPIRATORY	Streptococcus sp. HMSC057E02	[u'RIBOSOMAL']	[u'SACTIPEPTIDE']	1	605_["Subtilosin-A, partial structure"]	0.666667	O=C([C@@H](NN[C@H](C(NCC(N[C@@H](CS[C@](N1)(CC2=CC=CC=C2)C(NCC(N[C@H](C(N[C@H]3CC4=CNC5=C4C=CC=C5)=O)CC(C)C)=O)=O)C(N[C@@H](C)C(N[C@]([H])(C(N[C@@H](CS6)C(N[C@H](C(N[C@]([H])(C(NCC(N[C@@H](C)C(N[C@@H](C)C(N[C@@H](CSC(N7)(CC8=CC=CC=C8)C(N[C@H](C(N[C@]([H])(C(N[C@@H](C)C(NCC(N[C@@H](C)C(NC6(C(NCC(N[C@H](C1=O)CC(C)C)=O)=O)[C@H](O)C)=O)=O)=O)=O)[C@@H](C)CC)=O)CCC(O)=O)=O)C(N[C@H](C(N[C@H](C(N[C@@H](C…
APMZ01	SKIN	Streptococcus pyogenes 06BA18369	[u'RIBOSOMAL']	[u'LINEAR_AZOLE_CONTAINING_PEPTIDE']	3	600_["PLANTAZOLICIN B"]	0.789474	O=C(O)C(N=C(O)C1N=C(OC1(C))c2nc(oc2)c3nc(oc3)c4nc(oc4)c5nc(oc5)C(N=C(O)C(N=C(O)c6nc(oc6C)c7nc(oc7C)c%10nc(c8nc(oc8C)c9nc(C(N)CCCNC(=N)N)sc9)sc%10)C(C)CC)C(C)CC)Cc%11ccccc%11
APMZ01	SKIN	Streptococcus pyogenes 06BA18369	[u'RIBOSOMAL']	[u'CLASS_II_LANTIPEPTIDE']	5	121_["SALIVARICIN A"]	0.9375	CCC(C(C(NC(C(NC(C(NC(C(NC(C(NC(C(NC(C(NC(C(N1CCCC1C(NC(C(NC(C(NC(C(NC(C(NC(C(NC2CS3)=O)C(C)C)=O)Cc4ccccc4)=O)C(C)C)=O)CSCC(C(O)=O)NC2=O)=O)CC(N)=O)=O)=O)CS5)=O)CC(O)=O)=O)CC(O)=O)=O)C3C)=O)C(CC)C)=O)C5C)=O)C)=O)NC(C(NC(CNC(C(NC(CNC(C(NC(C(CCCCN)N)=O)CCCNC(N)=N)=O)=O)CO)=O)=O)CC6=CNc7c6cccc7)=O)C
CDYA01	CSF	Streptococcus suis	[u'RIBOSOMAL']	[u'CLASS_II_LANTIPEPTIDE']	2	88_["A-3802-VI-7"]	0.678571	O=C(O)CCC4NC(=O)C(NC(=O)C6NC(=O)C(NC(=O)C(NC(=O)C1NC(=O)C(NC(=O)C(NC(=O)CNC(=O)C(NC(=O)C(NC(=O)C)CSC1)CO)Cc3c[nH]c2ccccc23)C(C)C)C(C)SCC(NC4(=O))C(=O)NCC(=O)NC5C(=O)NC(C(=O)NC(C(=O)NC(C(=O)NC(C(=O)NC(C(=O)OC)CS(=O)C5(C))C)CSC6(C))C(C)CC)C(C)C)CC(C)C)C(C)CC
AUYY01	STOOL	Clostridium botulinum B2 267	[u'RIBOSOMAL']	[u'LINEAR_AZOLE_CONTAINING_PEPTIDE']	2	603_clostridiolysin_S	0.9	NC(CS)C1=NC(C2=NC(C3=NC(C4=NC(C5=NC(C6=NC(C7=NC(C8=NC(C(NC(C9=NC(C(NC(C%10=NC(C(NC(C(NCC(NCC(NCC%11=NC(C(NC(C)C%12=NC(C%13=NC(C(NCC(NCC(NCC(NC(C)C(NC(C)C(NC(C)C(NCC(NC(C(NCC(NCC(NC(C(O)=O)CC(N)=O)=O)=O)=O)CCC(N)=O)=O)=O)=O)=O)=O)=O)=O)=O)=C(C)O%13)=CO%12)=O)=CO%11)=O)=O)=O)C(C)C)=O)=CO%10)C(C)C)=O)=CO9)C(C)C)=O)=CS8)=CS7)=CS6)=CS5)=CO4)=CS3)=CS2)=CS1
JYAN01	SKIN	Staphylococcus aureus	[u'RIBOSOMAL']	[u'CLASS_I_LANTIPEPTIDE']	2	105_["Lanthionine containing peptide","HYICIN M51"]	0.952381	O=C(N)CC5NC(=O)C(NC(=O)C(NC(=O)CNC(=O)C(=CC)NC(=O)C(NC(=O)C(NC(=O)C3NC(=O)CNC(=O)C4N(C(=O)C(NC(=O)C1NC(=O)C(NC(=O)C(=C)NC(=O)C(NC(=O)C(NC(=O)C(=CC)NC(=O)C(N)C(C)CC)CSC1)Cc2ccccc2)CC(C)C)C(C)SC3)CCC4)C)CCCCN)CSCC6NC(=O)C(NC(=O)C(NC5(=O))CSC=CNC6(=O))Cc7ccc(O)cc7)Cc8ccccc8
JYAN01	SKIN	Staphylococcus aureus	[u'RIBOSOMAL']	[u'CLASS_I_LANTIPEPTIDE']	5	204_Prochlorosin 4.3	0.681818	O=C(C(N[C@@H](C)C(N[C@H](C(NCC(NC1)=O)=O)CSC[C@@H](C(N[C@@H](CC(O)=O)C(N[C@H](C(N[C@H](C(N[C@@H](CCSC)C(N[C@@H](CC2=CC=CC=C2)C(N[C@@H](CS3)C(N[C@@H](CC4=CC=C(C=C4)O)C(O)=O)=O)=O)=O)=O)CO)=O)C3C)=O)=O)NC1=O)=O)=O)CC
LVYP01	ORAL	Streptococcus pyogenes	[u'RIBOSOMAL']	[u'LINEAR_AZOLE_CONTAINING_PEPTIDE']	1	600_["PLANTAZOLICIN B"]	0.789474	O=C(O)C(N=C(O)C1N=C(OC1(C))c2nc(oc2)c3nc(oc3)c4nc(oc4)c5nc(oc5)C(N=C(O)C(N=C(O)c6nc(oc6C)c7nc(oc7C)c%10nc(c8nc(oc8C)c9nc(C(N)CCCNC(=N)N)sc9)sc%10)C(C)CC)C(C)CC)Cc%11ccccc%11
LVYP01	ORAL	Streptococcus pyogenes	[u'RIBOSOMAL']	[u'CLASS_I_LANTIPEPTIDE']	2	124_["STREPTIN"]	1	CC(CC1NC(C(NC(C(NC(C(NC(CNC(C(C(C)C)N)=O)=O)CSCC(C(NC(C(N2CCCC2C(NCC(NC(C(NC(C(NC(C(NC(C(NC(C(NC3C(C)C)=O)CC(C)C)=O)CCCCN)=O)CC4=CNc5c4cccc5)=O)CS6)=O)CSCC(C(NC(C(N/C(C(N/C(C(N/C(C(NC(C(NC(C(O)=O)CCCCN)=O)C(C)C)=O)=C/C)=O)=C/C)=O)=C/C)=O)Cc7ccccc7)=O)NC3=O)=O)=O)=O)C6C)=O)NC1=O)=O)CCCNC(N)=N)=O)Cc8ccc(O)cc8)=O)C
LVYP01	ORAL	Streptococcus pyogenes	[u'RIBOSOMAL']	[u'CLASS_II_LANTIPEPTIDE']	5	121_["SALIVARICIN A"]	0.9375	CCC(C(C(NC(C(NC(C(NC(C(NC(C(NC(C(NC(C(NC(C(N1CCCC1C(NC(C(NC(C(NC(C(NC(C(NC(C(NC2CS3)=O)C(C)C)=O)Cc4ccccc4)=O)C(C)C)=O)CSCC(C(O)=O)NC2=O)=O)CC(N)=O)=O)=O)CS5)=O)CC(O)=O)=O)CC(O)=O)=O)C3C)=O)C(CC)C)=O)C5C)=O)C)=O)NC(C(NC(CNC(C(NC(CNC(C(NC(C(CCCCN)N)=O)CCCNC(N)=N)=O)=O)CO)=O)=O)CC6=CNc7c6cccc7)=O)C
CDVZ01	CSF	Streptococcus suis	[u'RIBOSOMAL']	[u'CLASS_II_LANTIPEPTIDE']	1	88_["A-3802-VI-7"]	0.678571	O=C(O)CCC4NC(=O)C(NC(=O)C6NC(=O)C(NC(=O)C(NC(=O)C1NC(=O)C(NC(=O)C(NC(=O)CNC(=O)C(NC(=O)C(NC(=O)C)CSC1)CO)Cc3c[nH]c2ccccc23)C(C)C)C(C)SCC(NC4(=O))C(=O)NCC(=O)NC5C(=O)NC(C(=O)NC(C(=O)NC(C(=O)NC(C(=O)NC(C(=O)OC)CS(=O)C5(C))C)CSC6(C))C(C)CC)C(C)C)CC(C)C)C(C)CC
CECO01	CSF	Streptococcus suis	[u'RIBOSOMAL']	[u'CLASS_II_LANTIPEPTIDE']	2	88_["A-3802-VI-7"]	0.678571	O=C(O)CCC4NC(=O)C(NC(=O)C6NC(=O)C(NC(=O)C(NC(=O)C1NC(=O)C(NC(=O)C(NC(=O)CNC(=O)C(NC(=O)C(NC(=O)C)CSC1)CO)Cc3c[nH]c2ccccc23)C(C)C)C(C)SCC(NC4(=O))C(=O)NCC(=O)NC5C(=O)NC(C(=O)NC(C(=O)NC(C(=O)NC(C(=O)NC(C(=O)OC)CS(=O)C5(C))C)CSC6(C))C(C)CC)C(C)C)CC(C)C)C(C)CC
CDTV01	CSF	Streptococcus suis	[u'RIBOSOMAL']	[u'CLASS_II_LANTIPEPTIDE']	2	88_["A-3802-VI-7"]	0.678571	O=C(O)CCC4NC(=O)C(NC(=O)C6NC(=O)C(NC(=O)C(NC(=O)C1NC(=O)C(NC(=O)C(NC(=O)CNC(=O)C(NC(=O)C(NC(=O)C)CSC1)CO)Cc3c[nH]c2ccccc23)C(C)C)C(C)SCC(NC4(=O))C(=O)NCC(=O)NC5C(=O)NC(C(=O)NC(C(=O)NC(C(=O)NC(C(=O)NC(C(=O)OC)CS(=O)C5(C))C)CSC6(C))C(C)CC)C(C)C)CC(C)C)C(C)CC
AZFN01	GI	Lactobacillus gastricus DSM 16045	[u'RIBOSOMAL']	[u'CLASS_II_LANTIPEPTIDE']	2	113_["MUTACIN 1140","MUTICIN 1140"]	0.714286	O=C(NC(C(=O)NC7C(=O)NC(C(=O)NC(C(=O)NC(=CC)C(=O)N6CCCC6(C(=O)NCC(=O)NC5C(=O)NC(C(=O)NC(C(=O)NC(C(=O)NCC(=O)NC2C(=O)NC(C(=O)NC(C(=O)NC1C(=O)NC(C(=O)NC(C(=O)NC=CSC1)CSC2)Cc3ccc(O)cc3)CC(=O)N)Cc4ccccc4)C(C)SC5)CCCNC(=N)N)C))CSC7)CC(C)C)Cc9c[nH]c8ccccc89)C(=C)NC(=O)C(NC(=O)C(N)Cc%10ccccc%10)CCCCN
LRGJ01	SKIN	Streptococcus pyogenes	[u'RIBOSOMAL']	[u'LINEAR_AZOLE_CONTAINING_PEPTIDE']	1	600_["PLANTAZOLICIN B"]	0.789474	O=C(O)C(N=C(O)C1N=C(OC1(C))c2nc(oc2)c3nc(oc3)c4nc(oc4)c5nc(oc5)C(N=C(O)C(N=C(O)c6nc(oc6C)c7nc(oc7C)c%10nc(c8nc(oc8C)c9nc(C(N)CCCNC(=N)N)sc9)sc%10)C(C)CC)C(C)CC)Cc%11ccccc%11
LRGJ01	SKIN	Streptococcus pyogenes	[u'RIBOSOMAL']	[u'CLASS_II_LANTIPEPTIDE']	4	121_["SALIVARICIN A"]	0.9375	CCC(C(C(NC(C(NC(C(NC(C(NC(C(NC(C(NC(C(NC(C(N1CCCC1C(NC(C(NC(C(NC(C(NC(C(NC(C(NC2CS3)=O)C(C)C)=O)Cc4ccccc4)=O)C(C)C)=O)CSCC(C(O)=O)NC2=O)=O)CC(N)=O)=O)=O)CS5)=O)CC(O)=O)=O)CC(O)=O)=O)C3C)=O)C(CC)C)=O)C5C)=O)C)=O)NC(C(NC(CNC(C(NC(CNC(C(NC(C(CCCCN)N)=O)CCCNC(N)=N)=O)=O)CO)=O)=O)CC6=CNc7c6cccc7)=O)C
AHJD01	RESPIRATORY	Burkholderia pseudomallei 354e	[u'RIBOSOMAL']	[u'LASSO_PEPTIDE']	7	561_["CAPISTRUIN"]	0.833333	O[C@H](C)[C@@H](C(N1CCC[C@H]1C(NCC(N[C@@H](CC2=CC=CC=C2)C(N[C@H](C(N[C@H](C(N3CCC[C@H]3C(N[C@@H](C4)C(N[C@@H](C)C(N[C@H](C(N[C@H](C(N[C@@H]([C@H](CC)C)C(N[C@H](C(N[C@H](C(N[C@@H](CC5=CC=CC=C5)C(NCC(N[C@@H](CC6=CC=CC=C6)C(N[C@H](C(O)=O)CC(N)=O)=O)=O)=O)=O)CCCNC(N)=N)=O)CO)=O)=O)C(C)C)=O)CCCNC(N)=N)=O)=O)=O)=O)[C@@H](C)O)=O)CCC(N)=O)=O)=O)=O)=O)NC(CNC4=O)=O
CDXH01	CSF	Streptococcus suis	[u'RIBOSOMAL']	[u'CLASS_II_LANTIPEPTIDE']	2	88_["A-3802-VI-7"]	0.678571	O=C(O)CCC4NC(=O)C(NC(=O)C6NC(=O)C(NC(=O)C(NC(=O)C1NC(=O)C(NC(=O)C(NC(=O)CNC(=O)C(NC(=O)C(NC(=O)C)CSC1)CO)Cc3c[nH]c2ccccc23)C(C)C)C(C)SCC(NC4(=O))C(=O)NCC(=O)NC5C(=O)NC(C(=O)NC(C(=O)NC(C(=O)NC(C(=O)NC(C(=O)OC)CS(=O)C5(C))C)CSC6(C))C(C)CC)C(C)C)CC(C)C)C(C)CC
CTEB01	SKIN	Staphylococcus capitis	[u'RIBOSOMAL']	[u'CLASS_I_LANTIPEPTIDE']	4	106_["Lanthionine containing peptide","HYICIN M51"]	0.666667	O=C(N)CC5NC(=O)C(NC(=O)C(NC(=O)CNC(=O)C(=CC)NC(=O)C(NC(=O)C(NC(=O)C3NC(=O)CNC(=O)C4N(C(=O)C(NC(=O)C1NC(=O)C(NC(=O)C(NC(=O)C(=C)NC(=O)C(NC(=O)C(=CC)NC(=O)C(N)C(C)CC)CSC1)Cc2ccccc2)CC(C)C)C(C)SC3)CCC4)C)CCCCN)CSCC6NC(=O)C(NC(=O)C(NC5(=O))CSC=CNC6(=O))Cc7ccc(O)cc7)Cc8ccccc8
AHVR01	NOSE	Staphylococcus aureus subsp. aureus CIGC340D	[u'RIBOSOMAL']	[u'BACTERIAL_HEAD_TO_TAIL_CYCLIZED']	2	595_Syanodin I	0.590909	CC(C[C@@H](C(N[C@H](C(NCC(O)=O)=O)C)=O)NC(CNC([C@@H](NC(CNC([C@@H](NC([C@@H]1CCCN1C([C@@H](NC([C@@H]2CC(NCC(N[C@H](C(N[C@H](C(NCC(NCC(N[C@H](C(N[C@H](C(N2)=O)C(C)C)=O)[C@H](O)C)=O)=O)=O)CO)=O)CC(C)C)=O)=O)=O)C)=O)=O)C)=O)=O)CCC(N)=O)=O)=O)C
AGKK01	ORAL	Streptococcus mutans TCI-120	[u'RIBOSOMAL']	[u'CLASS_II_BACTERIOCIN']	2	69_Antimicrobial protein BL-A60	0.545455		MLVDILTIKKGGIHMNTRMMEQFETMDAETLSHVTGGGLYDGANGYAYRDSQGHWAYKVTKTPAQALTDVVVNSWASGAASFAAYA
LOLJ01	RESPIRATORY	Legionella pneumophila	[u'RIBOSOMAL']	[u'LASSO_PEPTIDE']	2	276_["PRE-T","10381-T","PRE-10381-T"]	0.571429	O=C(N)c3nc4c1nc(oc1C)C(NC(=O)c6nc(C(NC(=O)c2nc(oc2C)CNC(=O)C(NC(=O)c5nc(c4(cc3))sc5)C(C)C)C)sc6)C
AHZH01	NOSE	Staphylococcus aureus subsp. aureus 091751	[u'RIBOSOMAL']	[u'BACTERIAL_HEAD_TO_TAIL_CYCLIZED']	3	595_Syanodin I	0.590909	CC(C[C@@H](C(N[C@H](C(NCC(O)=O)=O)C)=O)NC(CNC([C@@H](NC(CNC([C@@H](NC([C@@H]1CCCN1C([C@@H](NC([C@@H]2CC(NCC(N[C@H](C(N[C@H](C(NCC(NCC(N[C@H](C(N[C@H](C(N2)=O)C(C)C)=O)[C@H](O)C)=O)=O)=O)CO)=O)CC(C)C)=O)=O)=O)C)=O)=O)C)=O)=O)CCC(N)=O)=O)=O)C
JGSE01	URINE	Staphylococcus aureus DAR1692	[u'RIBOSOMAL']	[u'BACTERIAL_HEAD_TO_TAIL_CYCLIZED']	2	595_Syanodin I	0.590909	CC(C[C@@H](C(N[C@H](C(NCC(O)=O)=O)C)=O)NC(CNC([C@@H](NC(CNC([C@@H](NC([C@@H]1CCCN1C([C@@H](NC([C@@H]2CC(NCC(N[C@H](C(N[C@H](C(NCC(NCC(N[C@H](C(N[C@H](C(N2)=O)C(C)C)=O)[C@H](O)C)=O)=O)=O)CO)=O)CC(C)C)=O)=O)=O)C)=O)=O)C)=O)=O)CCC(N)=O)=O)=O)C
AGMR01	ORAL	Streptococcus mutans TCI-62	[u'RIBOSOMAL']	[u'CLASS_II_BACTERIOCIN']	2	69_Antimicrobial protein BL-A60	0.545455		MNTRMMEQFETMDAETLSHVTGGGLYDGANGYAYRDSQGHWAYKVTKTPAQALTDVVVNSWASGAASFAAYA
CDUN01	CSF	Streptococcus suis	[u'RIBOSOMAL']	[u'CLASS_II_LANTIPEPTIDE']	2	88_["A-3802-VI-7"]	0.678571	O=C(O)CCC4NC(=O)C(NC(=O)C6NC(=O)C(NC(=O)C(NC(=O)C1NC(=O)C(NC(=O)C(NC(=O)CNC(=O)C(NC(=O)C(NC(=O)C)CSC1)CO)Cc3c[nH]c2ccccc23)C(C)C)C(C)SCC(NC4(=O))C(=O)NCC(=O)NC5C(=O)NC(C(=O)NC(C(=O)NC(C(=O)NC(C(=O)NC(C(=O)OC)CS(=O)C5(C))C)CSC6(C))C(C)CC)C(C)C)CC(C)C)C(C)CC
LTYG01	RESPIRATORY	Lactobacillus sp. HMSC068F07	[u'RIBOSOMAL']	[u'BACTERIAL_HEAD_TO_TAIL_CYCLIZED']	3	276_["PRE-T","10381-T","PRE-10381-T"]	0.571429	O=C(N)c3nc4c1nc(oc1C)C(NC(=O)c6nc(C(NC(=O)c2nc(oc2C)CNC(=O)C(NC(=O)c5nc(c4(cc3))sc5)C(C)C)C)sc6)C
LNMX01	STOOL	Enterococcus faecium	[u'RIBOSOMAL']	[u'CLASS_II_BACTERIOCIN']	1	40_Enterocin A	1		MKHLKILSIKETQLIYGGTTHSGKYYGNGVYCTKNKCTVDWAKATTCIAGMSIGGFLGGAIPGKC
JGTH01	RESPIRATORY	Staphylococcus aureus DAR2002	[u'RIBOSOMAL']	[u'BACTERIAL_HEAD_TO_TAIL_CYCLIZED']	3	595_Syanodin I	0.590909	CC(C[C@@H](C(N[C@H](C(NCC(O)=O)=O)C)=O)NC(CNC([C@@H](NC(CNC([C@@H](NC([C@@H]1CCCN1C([C@@H](NC([C@@H]2CC(NCC(N[C@H](C(N[C@H](C(NCC(NCC(N[C@H](C(N[C@H](C(N2)=O)C(C)C)=O)[C@H](O)C)=O)=O)=O)CO)=O)CC(C)C)=O)=O)=O)C)=O)=O)C)=O)=O)CCC(N)=O)=O)=O)C
CEBC01	CSF	Streptococcus suis	[u'RIBOSOMAL']	[u'CLASS_II_LANTIPEPTIDE']	2	88_["A-3802-VI-7"]	0.678571	O=C(O)CCC4NC(=O)C(NC(=O)C6NC(=O)C(NC(=O)C(NC(=O)C1NC(=O)C(NC(=O)C(NC(=O)CNC(=O)C(NC(=O)C(NC(=O)C)CSC1)CO)Cc3c[nH]c2ccccc23)C(C)C)C(C)SCC(NC4(=O))C(=O)NCC(=O)NC5C(=O)NC(C(=O)NC(C(=O)NC(C(=O)NC(C(=O)NC(C(=O)OC)CS(=O)C5(C))C)CSC6(C))C(C)CC)C(C)C)CC(C)C)C(C)CC
AMAX01	ORAL	Enterococcus faecium ERV102	[u'RIBOSOMAL']	[u'CLASS_II_BACTERIOCIN']	3	40_Enterocin A	1		MKHLKILSIKETQLIYGGTTHSGKYYGNGVYCTKNKCTVDWAKATTCIAGMSIGGFLGGAIPGKC
CDYD01	CSF	Streptococcus suis	[u'RIBOSOMAL']	[u'CLASS_II_LANTIPEPTIDE']	2	88_["A-3802-VI-7"]	0.678571	O=C(O)CCC4NC(=O)C(NC(=O)C6NC(=O)C(NC(=O)C(NC(=O)C1NC(=O)C(NC(=O)C(NC(=O)CNC(=O)C(NC(=O)C(NC(=O)C)CSC1)CO)Cc3c[nH]c2ccccc23)C(C)C)C(C)SCC(NC4(=O))C(=O)NCC(=O)NC5C(=O)NC(C(=O)NC(C(=O)NC(C(=O)NC(C(=O)NC(C(=O)OC)CS(=O)C5(C))C)CSC6(C))C(C)CC)C(C)C)CC(C)C)C(C)CC
LOSA01	VAGINA	Streptococcus sp. FDAARGOS_146	[u'RIBOSOMAL']	[u'LINEAR_AZOLE_CONTAINING_PEPTIDE']	3	600_["PLANTAZOLICIN B"]	0.789474	O=C(O)C(N=C(O)C1N=C(OC1(C))c2nc(oc2)c3nc(oc3)c4nc(oc4)c5nc(oc5)C(N=C(O)C(N=C(O)c6nc(oc6C)c7nc(oc7C)c%10nc(c8nc(oc8C)c9nc(C(N)CCCNC(=N)N)sc9)sc%10)C(C)CC)C(C)CC)Cc%11ccccc%11
JGQD01	URINE	Staphylococcus aureus DAR3885	[u'RIBOSOMAL']	[u'BACTERIAL_HEAD_TO_TAIL_CYCLIZED']	2	595_Syanodin I	0.590909	CC(C[C@@H](C(N[C@H](C(NCC(O)=O)=O)C)=O)NC(CNC([C@@H](NC(CNC([C@@H](NC([C@@H]1CCCN1C([C@@H](NC([C@@H]2CC(NCC(N[C@H](C(N[C@H](C(NCC(NCC(N[C@H](C(N[C@H](C(N2)=O)C(C)C)=O)[C@H](O)C)=O)=O)=O)CO)=O)CC(C)C)=O)=O)=O)C)=O)=O)C)=O)=O)CCC(N)=O)=O)=O)C
LFVC01	SKIN	Staphylococcus aureus subsp. aureus	[u'RIBOSOMAL']	[u'CLASS_I_LANTIPEPTIDE']	4	105_["Lanthionine containing peptide","HYICIN M51"]	0.952381	O=C(N)CC5NC(=O)C(NC(=O)C(NC(=O)CNC(=O)C(=CC)NC(=O)C(NC(=O)C(NC(=O)C3NC(=O)CNC(=O)C4N(C(=O)C(NC(=O)C1NC(=O)C(NC(=O)C(=C)NC(=O)C(NC(=O)C(NC(=O)C(=CC)NC(=O)C(N)C(C)CC)CSC1)Cc2ccccc2)CC(C)C)C(C)SC3)CCC4)C)CCCCN)CSCC6NC(=O)C(NC(=O)C(NC5(=O))CSC=CNC6(=O))Cc7ccc(O)cc7)Cc8ccccc8
LNLH01	STOOL	Enterococcus faecium	[u'RIBOSOMAL']	[u'CLASS_II_BACTERIOCIN']	1	40_Enterocin A	1		MKHLKILSIKETQLIYGGTTHSGKYYGNGVYCTKNKCTVDWAKATTCIAGMSIGGFLGGAIPGKC
LRHH01	SKIN	Streptococcus pyogenes	[u'RIBOSOMAL']	[u'CLASS_II_LANTIPEPTIDE']	1	121_["SALIVARICIN A"]	0.9375	CCC(C(C(NC(C(NC(C(NC(C(NC(C(NC(C(NC(C(NC(C(N1CCCC1C(NC(C(NC(C(NC(C(NC(C(NC(C(NC2CS3)=O)C(C)C)=O)Cc4ccccc4)=O)C(C)C)=O)CSCC(C(O)=O)NC2=O)=O)CC(N)=O)=O)=O)CS5)=O)CC(O)=O)=O)CC(O)=O)=O)C3C)=O)C(CC)C)=O)C5C)=O)C)=O)NC(C(NC(CNC(C(NC(CNC(C(NC(C(CCCCN)N)=O)CCCNC(N)=N)=O)=O)CO)=O)=O)CC6=CNc7c6cccc7)=O)C
LRHH01	SKIN	Streptococcus pyogenes	[u'RIBOSOMAL']	[u'LINEAR_AZOLE_CONTAINING_PEPTIDE']	2	600_["PLANTAZOLICIN B"]	0.789474	O=C(O)C(N=C(O)C1N=C(OC1(C))c2nc(oc2)c3nc(oc3)c4nc(oc4)c5nc(oc5)C(N=C(O)C(N=C(O)c6nc(oc6C)c7nc(oc7C)c%10nc(c8nc(oc8C)c9nc(C(N)CCCNC(=N)N)sc9)sc%10)C(C)CC)C(C)CC)Cc%11ccccc%11
LTKL01	URINE	Streptococcus sp. HMSC034B05	[u'RIBOSOMAL']	[u'LINEAR_AZOLE_CONTAINING_PEPTIDE']	2	600_["PLANTAZOLICIN B"]	0.789474	O=C(O)C(N=C(O)C1N=C(OC1(C))c2nc(oc2)c3nc(oc3)c4nc(oc4)c5nc(oc5)C(N=C(O)C(N=C(O)c6nc(oc6C)c7nc(oc7C)c%10nc(c8nc(oc8C)c9nc(C(N)CCCNC(=N)N)sc9)sc%10)C(C)CC)C(C)CC)Cc%11ccccc%11
JGPA01	RESPIRATORY	Staphylococcus aureus DAR3752	[u'RIBOSOMAL']	[u'BACTERIAL_HEAD_TO_TAIL_CYCLIZED']	2	276_["PRE-T","10381-T","PRE-10381-T"]	0.571429	O=C(N)c3nc4c1nc(oc1C)C(NC(=O)c6nc(C(NC(=O)c2nc(oc2C)CNC(=O)C(NC(=O)c5nc(c4(cc3))sc5)C(C)C)C)sc6)C
ANAW01	RESPIRATORY	Nocardiopsis synnemataformans DSM 44143	[u'RIBOSOMAL']	[u'CLASS_I_LANTIPEPTIDE']	8	204_Prochlorosin 4.3	0.681818	O=C(C(N[C@@H](C)C(N[C@H](C(NCC(NC1)=O)=O)CSC[C@@H](C(N[C@@H](CC(O)=O)C(N[C@H](C(N[C@H](C(N[C@@H](CCSC)C(N[C@@H](CC2=CC=CC=C2)C(N[C@@H](CS3)C(N[C@@H](CC4=CC=C(C=C4)O)C(O)=O)=O)=O)=O)=O)CO)=O)C3C)=O)=O)NC1=O)=O)=O)CC
ANAW01	RESPIRATORY	Nocardiopsis synnemataformans DSM 44143	[u'RIBOSOMAL']	[u'LASSO_PEPTIDE']	10	550_Microviridin K	0.526316	NC(CC(C(NC(C(NC(CCSC)C(NC(C(NC(CC1=CC=C(C=C1)O)C(N2CCCC2C(NC(C(NC(C3)C(NC(CC4=CNC5=C4C=CC=C5)C(NC(C(NC(C(NC(CC6=CC=C(C=C6)O)C(O)=O)=O)CC7)=O)CC8)=O)=O)=O)COC8=O)=O)=O)=O)CCCCNC7=O)=O)=O)C(C)OC3=O)=O)NC(CNC(C(CC9=CC=C(C=C9)O)NC(C)=O)=O)=O)=O
JGKN01	SKIN	Staphylococcus aureus T49201	[u'RIBOSOMAL']	[u'BACTERIAL_HEAD_TO_TAIL_CYCLIZED']	2	595_Syanodin I	0.590909	CC(C[C@@H](C(N[C@H](C(NCC(O)=O)=O)C)=O)NC(CNC([C@@H](NC(CNC([C@@H](NC([C@@H]1CCCN1C([C@@H](NC([C@@H]2CC(NCC(N[C@H](C(N[C@H](C(NCC(NCC(N[C@H](C(N[C@H](C(N2)=O)C(C)C)=O)[C@H](O)C)=O)=O)=O)CO)=O)CC(C)C)=O)=O)=O)C)=O)=O)C)=O)=O)CCC(N)=O)=O)=O)C
LFUU01	SKIN	Staphylococcus aureus subsp. aureus	[u'RIBOSOMAL']	[u'CLASS_I_LANTIPEPTIDE']	4	105_["Lanthionine containing peptide","HYICIN M51"]	0.952381	O=C(N)CC5NC(=O)C(NC(=O)C(NC(=O)CNC(=O)C(=CC)NC(=O)C(NC(=O)C(NC(=O)C3NC(=O)CNC(=O)C4N(C(=O)C(NC(=O)C1NC(=O)C(NC(=O)C(=C)NC(=O)C(NC(=O)C(NC(=O)C(=CC)NC(=O)C(N)C(C)CC)CSC1)Cc2ccccc2)CC(C)C)C(C)SC3)CCC4)C)CCCCN)CSCC6NC(=O)C(NC(=O)C(NC5(=O))CSC=CNC6(=O))Cc7ccc(O)cc7)Cc8ccccc8
LNMS01	STOOL	Enterococcus faecium	[u'RIBOSOMAL']	[u'CLASS_II_BACTERIOCIN']	1	40_Enterocin A	1		MKHLKILSIKETQLIYGGTTHSGKYYGNGVYCTKNKCTVDWAKATTCIAGMSIGGFLGGAIPGKC
LPUN01	STOOL	Escherichia coli	[u'RIBOSOMAL']	[u'LINEAR_AZOLE_CONTAINING_PEPTIDE']	2	601_["MccB17","MICROCIN B17","MICROCIN 17W"]	1	O=C(O)C(N=C(O)C(N=C(O)C(N=C(O)CN=C(O)c1nc(oc1)CN=C(O)CN=C(O)c2nc(oc2)CN=C(O)CN=C(O)C(N=C(O)CN=C(O)CN=C(O)c3nc(oc3)c8nc(CN=C(O)C(N=C(O)C(N=C(O)c7nc(CN=C(O)CN=C(O)c6nc(CN=C(O)CN=C(O)CN=C(O)C(N=C(O)CN=C(O)CN=C(O)c5nc(c4nc(oc4)CN=C(O)CN=C(O)CN=C(O)CN=C(O)CN=C(O)CN=C(O)CN=C(O)CN=C(O)CN=C(O)CN=C(O)C(N=C(O)CN=C(O)C(N)C(C)C)C(C)CC)sc5)CCC(=N)O)sc6)sc7)CO)CC(=N)O)sc8)CC(=N)O)CO)Cc9cnc[nH]9)C(C)CC
AHVT01	NOSE	Staphylococcus aureus subsp. aureus CIGC348	[u'RIBOSOMAL']	[u'BACTERIAL_HEAD_TO_TAIL_CYCLIZED']	2	595_Syanodin I	0.590909	CC(C[C@@H](C(N[C@H](C(NCC(O)=O)=O)C)=O)NC(CNC([C@@H](NC(CNC([C@@H](NC([C@@H]1CCCN1C([C@@H](NC([C@@H]2CC(NCC(N[C@H](C(N[C@H](C(NCC(NCC(N[C@H](C(N[C@H](C(N2)=O)C(C)C)=O)[C@H](O)C)=O)=O)=O)CO)=O)CC(C)C)=O)=O)=O)C)=O)=O)C)=O)=O)CCC(N)=O)=O)=O)C
CECK01	CSF	Streptococcus suis	[u'RIBOSOMAL']	[u'CLASS_II_LANTIPEPTIDE']	2	88_["A-3802-VI-7"]	0.678571	O=C(O)CCC4NC(=O)C(NC(=O)C6NC(=O)C(NC(=O)C(NC(=O)C1NC(=O)C(NC(=O)C(NC(=O)CNC(=O)C(NC(=O)C(NC(=O)C)CSC1)CO)Cc3c[nH]c2ccccc23)C(C)C)C(C)SCC(NC4(=O))C(=O)NCC(=O)NC5C(=O)NC(C(=O)NC(C(=O)NC(C(=O)NC(C(=O)NC(C(=O)OC)CS(=O)C5(C))C)CSC6(C))C(C)CC)C(C)C)CC(C)C)C(C)CC
AGLM01	ORAL	Streptococcus mutans TCI-212	[u'RIBOSOMAL']	[u'CLASS_II_BACTERIOCIN']	3	69_Antimicrobial protein BL-A60	0.545455		MNTKMMEQFETMDTETLSHVTGGGLYDGANGYAYRDSQGHWAYKVTKTPAQALTDVVVNSWASGAASFAAYA
AGKG01	ORAL	Streptococcus mutans TCI-109	[u'RIBOSOMAL']	[u'CLASS_II_BACTERIOCIN']	2	69_Antimicrobial protein BL-A60	0.545455		MLVDILTIKKGGIHMNTRMMEQFETMDAEILSHVTGGGLYDGANGYAYRDSQGHWAYKVTKTPAQALTDVVVNSWASGAASFAAYA
LRGX01	SKIN	Streptococcus pyogenes	[u'RIBOSOMAL']	[u'LINEAR_AZOLE_CONTAINING_PEPTIDE']	1	600_["PLANTAZOLICIN B"]	0.789474	O=C(O)C(N=C(O)C1N=C(OC1(C))c2nc(oc2)c3nc(oc3)c4nc(oc4)c5nc(oc5)C(N=C(O)C(N=C(O)c6nc(oc6C)c7nc(oc7C)c%10nc(c8nc(oc8C)c9nc(C(N)CCCNC(=N)N)sc9)sc%10)C(C)CC)C(C)CC)Cc%11ccccc%11
LRGX01	SKIN	Streptococcus pyogenes	[u'RIBOSOMAL']	[u'CLASS_II_LANTIPEPTIDE']	4	121_["SALIVARICIN A"]	0.9375	CCC(C(C(NC(C(NC(C(NC(C(NC(C(NC(C(NC(C(NC(C(N1CCCC1C(NC(C(NC(C(NC(C(NC(C(NC(C(NC2CS3)=O)C(C)C)=O)Cc4ccccc4)=O)C(C)C)=O)CSCC(C(O)=O)NC2=O)=O)CC(N)=O)=O)=O)CS5)=O)CC(O)=O)=O)CC(O)=O)=O)C3C)=O)C(CC)C)=O)C5C)=O)C)=O)NC(C(NC(CNC(C(NC(CNC(C(NC(C(CCCCN)N)=O)CCCNC(N)=N)=O)=O)CO)=O)=O)CC6=CNc7c6cccc7)=O)C
LRGX01	SKIN	Streptococcus pyogenes	[u'RIBOSOMAL']	[u'CLASS_I_LANTIPEPTIDE']	5	124_["STREPTIN"]	1	CC(CC1NC(C(NC(C(NC(C(NC(CNC(C(C(C)C)N)=O)=O)CSCC(C(NC(C(N2CCCC2C(NCC(NC(C(NC(C(NC(C(NC(C(NC(C(NC3C(C)C)=O)CC(C)C)=O)CCCCN)=O)CC4=CNc5c4cccc5)=O)CS6)=O)CSCC(C(NC(C(N/C(C(N/C(C(N/C(C(NC(C(NC(C(O)=O)CCCCN)=O)C(C)C)=O)=C/C)=O)=C/C)=O)=C/C)=O)Cc7ccccc7)=O)NC3=O)=O)=O)=O)C6C)=O)NC1=O)=O)CCCNC(N)=N)=O)Cc8ccc(O)cc8)=O)C
CAEP01	STOOL	Kurthia sp. Dielmo	[u'RIBOSOMAL']	[u'BACTERIAL_HEAD_TO_TAIL_CYCLIZED', u'COMX']	5	280_["Promothiocin A]	0.6	O=C(NC(=C)C(=N)O)c3nc4c1nc(oc1C)C(N=C(O)c6nc(C(N=C(O)c2nc(oc2C)CN=C(O)C(N=C(O)c5nc(c4(cc3))sc5)C(C)C)C)sc6)C
JGQE01	EYE	Staphylococcus aureus DAR3886	[u'RIBOSOMAL']	[u'BACTERIAL_HEAD_TO_TAIL_CYCLIZED']	3	569_["XANTHOMONIN II"]	0.578947	CC(C)C[C@@H](C(N[C@@H](C)C(NCC(N[C@H](C(N[C@H](C(N[C@@H](CCSC)C(NCC(NCC(N[C@@H]([C@H](CC)C)C(N[C@H](C(N[C@H](C(O)=O)[C@@H](C)O)=O)[C@@H](C)O)=O)=O)=O)=O)=O)CCC(O)=O)=O)CC1)=O)=O)=O)NC([C@@H]2CCCN2C(CNC(CNC1=O)=O)=O)=O
CDXN01	CSF	Streptococcus suis	[u'RIBOSOMAL']	[u'CLASS_II_LANTIPEPTIDE']	1	88_["A-3802-VI-7"]	0.678571	O=C(O)CCC4NC(=O)C(NC(=O)C6NC(=O)C(NC(=O)C(NC(=O)C1NC(=O)C(NC(=O)C(NC(=O)CNC(=O)C(NC(=O)C(NC(=O)C)CSC1)CO)Cc3c[nH]c2ccccc23)C(C)C)C(C)SCC(NC4(=O))C(=O)NCC(=O)NC5C(=O)NC(C(=O)NC(C(=O)NC(C(=O)NC(C(=O)NC(C(=O)OC)CS(=O)C5(C))C)CSC6(C))C(C)CC)C(C)C)CC(C)C)C(C)CC
LTUS01	VAGINA	Enterococcus sp. HMSC060E05	[u'RIBOSOMAL']	[u'CLASS_II_BACTERIOCIN']	2	40_Enterocin A	1		MKHLKILSIKETQLIYGGTTHSGKYYGNGVYCTKNKCTVDWAKATTCIAGMSIGGFLGGAIPGKC
ALYX01	ORAL	Streptococcus mutans B112SM-A	[u'RIBOSOMAL']	[u'CLASS_II_BACTERIOCIN']	3	69_Antimicrobial protein BL-A60	0.545455		MLVDILTIKKGGIHMNTRMMEQFETMDAETLSHVTGGGLYDGANGYAYRDSQGHWAYKVTKTPAQALTDVVVNSWASGAASFAAYA
ALYX01	ORAL	Streptococcus mutans B112SM-A	[u'RIBOSOMAL']	[u'CLASS_II_BACTERIOCIN']	8	69_Antimicrobial protein BL-A60	0.545455		MLVDILTIKKGGIHMNTRMMEQFETMDAETLSHVTGGGLYDGANGYAYRDSQGHWAYKVTKTPAQALTDVVVNSWASGAASFAAYA
ALOD01	URINE	Enterococcus faecalis ATCC 29212	[u'RIBOSOMAL']	[u'LASSO_PEPTIDE']	2	546_["MICROVIRIDIN-B"]	0.555556	[H]C(O)(C)C([H])(NC(=O)CNC(=O)C([H])(NC(=O)C)Cc1ccccc1)C(=O)NC7([H])(C(=O)NC([H])(C(=O)NC3([H])(C(=O)NC([H])(C(=O)N8CCCC8([H])(C(=O)NC4([H])(C(=O)NC([H])(C(=O)NC([H])(C(=O)NC([H])(C(=O)NC([H])(C(=O)NC([H])(C(=O)O)Cc2ccc(O)cc2)CCC(=O)NCCCC3)CCC(=O)OC4)Cc5cc6ccccc6([nH]5))CC(=O)OC7([H])(C))))Cc9ccc(O)cc9))CC(C)C)
ALOD01	URINE	Enterococcus faecalis ATCC 29212	[u'RIBOSOMAL']	[u'CLASS_II_LANTIPEPTIDE']	3	138_["Cytolysin LL"]	1	NC(C(N/C(C(N1CCCC1C(NC(C(NC(CS2)C(NC(C)C(NC(C(NC(C)C(NC(C)C(N/C(C(NC(C)C(NC(C)C(NC(C)C(NC(C(NC(C(NC(C)C(NC3C)=O)=O)=C)=O)CSCC(C(NCC(NC(CC4=CNC5=C4C=CC=C5)C(NC(C(NCC(NCC(NCC(NC(C(CC)C)C(NC(CC6=CC=CC=C6)C(NC(C(NCC(NC(C(N/C(C(NC(C(NC(C(NC(C(NC(C(NC(C(NC(C(NC7CC8=CN=CN8)=O)CCCCN)=O)CC(C)C)=O)CSCC(C(O)=O)NC7=O)=O)C(C)C)=O)C(C)C)=O)C(C)C)=O)=C/C)=O)C(C)C)=O)=O)C(C)O)=O)=O)=O)=O)=O)=O)C(C)C)=O)=O)=O)NC3…
JANO01	RESPIRATORY	Staphylococcus aureus LCT-SAM	[u'RIBOSOMAL']	[u'CLASS_I_LANTIPEPTIDE']	3	105_["Lanthionine containing peptide","HYICIN M51"]	0.952381	O=C(N)CC5NC(=O)C(NC(=O)C(NC(=O)CNC(=O)C(=CC)NC(=O)C(NC(=O)C(NC(=O)C3NC(=O)CNC(=O)C4N(C(=O)C(NC(=O)C1NC(=O)C(NC(=O)C(=C)NC(=O)C(NC(=O)C(NC(=O)C(=CC)NC(=O)C(N)C(C)CC)CSC1)Cc2ccccc2)CC(C)C)C(C)SC3)CCC4)C)CCCCN)CSCC6NC(=O)C(NC(=O)C(NC5(=O))CSC=CNC6(=O))Cc7ccc(O)cc7)Cc8ccccc8
LUXI01	CSF	Lactobacillus plantarum	[u'RIBOSOMAL']	[u'CLASS_II_BACTERIOCIN']	3	54_Plantaricin F	1		MLQFEKLQYSRLPQKKLAKISGGFNRGGYNFGKSVRHVVDAIGSVAGIRGILKSIR
LNLK01	STOOL	Enterococcus faecium	[u'RIBOSOMAL']	[u'CLASS_II_BACTERIOCIN']	1	16_Bacteriocin T8	1		MKKKVLKHCVILGILGTCLAGIGTGIKVDAATYYGNGLYCNKEKCWVDWNQAKGEIGKIIVNGWVNHGPWAPRR
LNLK01	STOOL	Enterococcus faecium	[u'RIBOSOMAL']	[u'CLASS_II_BACTERIOCIN']	3	40_Enterocin A	1		MKHLKILSIKETQLIYGGTTHSGKYYGNGVYCTKNKCTVDWAKATTCIAGMSIGGFLGGAIPGKC
AGKW01	ORAL	Streptococcus mutans TCI-162	[u'RIBOSOMAL']	[u'CLASS_II_BACTERIOCIN']	2	69_Antimicrobial protein BL-A60	0.545455		MLVDILTIKKGGIHMNTRMMEQFETMDAETLSHVTGGGLYDGANGYAYRDSQGHWAYKVTKTPAQALTDVVVNSWASGAASFAAYA
AHRY01	ORAL	Streptococcus mutans N29	[u'RIBOSOMAL']	[u'CLASS_II_BACTERIOCIN']	8	69_Antimicrobial protein BL-A60	0.545455		MLVDILTIKKGGIHMNTRMMEQFETMDAETLSHVTGGGLYDGANGYAYRDSQGHWAYKVTKTPAQALTDVVVNSWASGAASFAAYA
CDSQ01	CSF	Streptococcus suis	[u'RIBOSOMAL']	[u'CLASS_II_LANTIPEPTIDE']	1	129_["streptococcin A-M49"]	1	CCC(C(C(NC(C(NC(C(NC(C(NC(C(NC(C(NC(C(NC(C(NC1C(NC(C(NC(C(NC(C(NC(C(NC(C(N/C2=C\C)=O)C)=O)CC(C)C)=O)Cc3ccccc3)=O)C)=O)CC4=CNc5c4cccc5)=O)=O)CC(N)=O)=O)CC(C)C)=O)Cc6nc[nH]c6)=O)CS7)=O)CCC(O)=O)=O)Cc8nc[nH]c8)=O)CSCC(C(NC(C(NC(C(O)=O)=C)=O)CSC1C)=O)NC2=O)=O)NC(C(C7C)NC(C(NC(C(NC(C(C(C)C)NC(CNC(C(NC(C(NC(CN)=O)CCCCN)=O)CC(N)=O)=O)=O)=O)Cc9ccccc9)=O)CCCCN)=O)=O)C
CDSQ01	CSF	Streptococcus suis	[u'RIBOSOMAL']	[u'CLASS_II_LANTIPEPTIDE']	3	88_["A-3802-VI-7"]	0.678571	O=C(O)CCC4NC(=O)C(NC(=O)C6NC(=O)C(NC(=O)C(NC(=O)C1NC(=O)C(NC(=O)C(NC(=O)CNC(=O)C(NC(=O)C(NC(=O)C)CSC1)CO)Cc3c[nH]c2ccccc23)C(C)C)C(C)SCC(NC4(=O))C(=O)NCC(=O)NC5C(=O)NC(C(=O)NC(C(=O)NC(C(=O)NC(C(=O)NC(C(=O)OC)CS(=O)C5(C))C)CSC6(C))C(C)CC)C(C)C)CC(C)C)C(C)CC
LZXZ01	STOOL	Lactobacillus plantarum	[u'RIBOSOMAL']	[u'CLASS_II_BACTERIOCIN']	2	54_Plantaricin F	1		MNNLNKFSTLGKSSLSQIEGGSVPTSVYTLGIKILWSAYKHRKTIEKSFNKGFYH
JGTB01	RESPIRATORY	Staphylococcus aureus DAR1955	[u'RIBOSOMAL']	[u'BACTERIAL_HEAD_TO_TAIL_CYCLIZED']	2	595_Syanodin I	0.590909	CC(C[C@@H](C(N[C@H](C(NCC(O)=O)=O)C)=O)NC(CNC([C@@H](NC(CNC([C@@H](NC([C@@H]1CCCN1C([C@@H](NC([C@@H]2CC(NCC(N[C@H](C(N[C@H](C(NCC(NCC(N[C@H](C(N[C@H](C(N2)=O)C(C)C)=O)[C@H](O)C)=O)=O)=O)CO)=O)CC(C)C)=O)=O)=O)C)=O)=O)C)=O)=O)CCC(N)=O)=O)=O)C
LFXT01	URINE	Escherichia coli	[u'RIBOSOMAL']	[u'LINEAR_AZOLE_CONTAINING_PEPTIDE']	5	601_["MccB17","MICROCIN B17","MICROCIN 17W"]	1	O=C(O)C(N=C(O)C(N=C(O)C(N=C(O)CN=C(O)c1nc(oc1)CN=C(O)CN=C(O)c2nc(oc2)CN=C(O)CN=C(O)C(N=C(O)CN=C(O)CN=C(O)c3nc(oc3)c8nc(CN=C(O)C(N=C(O)C(N=C(O)c7nc(CN=C(O)CN=C(O)c6nc(CN=C(O)CN=C(O)CN=C(O)C(N=C(O)CN=C(O)CN=C(O)c5nc(c4nc(oc4)CN=C(O)CN=C(O)CN=C(O)CN=C(O)CN=C(O)CN=C(O)CN=C(O)CN=C(O)CN=C(O)CN=C(O)C(N=C(O)CN=C(O)C(N)C(C)C)C(C)CC)sc5)CCC(=N)O)sc6)sc7)CO)CC(=N)O)sc8)CC(=N)O)CO)Cc9cnc[nH]9)C(C)CC
JGNN01	URINE	Staphylococcus aureus DAR3769	[u'RIBOSOMAL']	[u'BACTERIAL_HEAD_TO_TAIL_CYCLIZED']	2	595_Syanodin I	0.590909	CC(C[C@@H](C(N[C@H](C(NCC(O)=O)=O)C)=O)NC(CNC([C@@H](NC(CNC([C@@H](NC([C@@H]1CCCN1C([C@@H](NC([C@@H]2CC(NCC(N[C@H](C(N[C@H](C(NCC(NCC(N[C@H](C(N[C@H](C(N2)=O)C(C)C)=O)[C@H](O)C)=O)=O)=O)CO)=O)CC(C)C)=O)=O)=O)C)=O)=O)C)=O)=O)CCC(N)=O)=O)=O)C
LAYX01	SKIN	Streptomyces sp. KE1	[u'RIBOSOMAL']	[u'LASSO_PEPTIDE']	3	644_[Mechercharstatin_A,IB_01211,MECHERCHARMYCIN_A,MECHERCHASTATIN]	0.5625	O=C(NC(C(CC)C)C(NC(C(C)C)C(NCc1occ(c2occ(c3occ(c4scc5n4)n3)n2)n1)=O)=O)c6c(c7ccccc7)oc5n6
LAYX01	SKIN	Streptomyces sp. KE1	[u'RIBOSOMAL']	[u'THIOPEPTIDE']	12	346_["BERNINAMYCIN-C"]	0.92	O=C(N)C(=C)NC(=O)c4nc5c1nc(oc1)C(=C)NC(=O)C(=C)NC(=O)c2nc(oc2C)C(=C)NC(=O)C(NC(=O)C(=C)NC(=O)c3nc(oc3C)C(=CC)NC(=O)C(NC(=O)c6nc(c5(cc4))sc6)C(O)C)C(O)(C)C
LAYX01	SKIN	Streptomyces sp. KE1	[u'RIBOSOMAL']	[u'CLASS_III_IV_LANTIPEPTIDE']	14	175_SAL-2242	1	NCC(N[C@H](C(N[C@H](C(N[C@@H]([C@H](CC)C)C(NC(C(N[C@H](C(N[C@H](C(N[C@H]1[C@H](CC)C)=O)CC(C)C)=O)CC(C)C)=O)=C)=O)=O)CCC(N)=O)=O)CSC[C@@H](C(N[C@H](C(N[C@@H](CC2=CC=C(C=C2)O)C(N[C@H](C(N[C@H](C(N[C@H](C(NC(C(N[C@H](C(N[C@H](C(N[C@H]3CC(C)C)=O)[C@@H](C)O)=O)C(C)C)=O)=C)=O)CC(C)C)=O)CO)=O)CSC[C@@H](C(N[C@H](C(N4CCC[C@H]4C(O)=O)=O)[C@@H](C)O)=O)NC3=O)=O)=O)CCC(O)=O)=O)NC1=O)=O
CDTO01	CSF	Streptococcus suis	[u'RIBOSOMAL']	[u'CLASS_II_LANTIPEPTIDE']	1	88_["A-3802-VI-7"]	0.678571	O=C(O)CCC4NC(=O)C(NC(=O)C6NC(=O)C(NC(=O)C(NC(=O)C1NC(=O)C(NC(=O)C(NC(=O)CNC(=O)C(NC(=O)C(NC(=O)C)CSC1)CO)Cc3c[nH]c2ccccc23)C(C)C)C(C)SCC(NC4(=O))C(=O)NCC(=O)NC5C(=O)NC(C(=O)NC(C(=O)NC(C(=O)NC(C(=O)NC(C(=O)OC)CS(=O)C5(C))C)CSC6(C))C(C)CC)C(C)C)CC(C)C)C(C)CC
JGPL01	URINE	Staphylococcus aureus DAR3782	[u'RIBOSOMAL']	[u'BACTERIAL_HEAD_TO_TAIL_CYCLIZED']	2	595_Syanodin I	0.590909	CC(C[C@@H](C(N[C@H](C(NCC(O)=O)=O)C)=O)NC(CNC([C@@H](NC(CNC([C@@H](NC([C@@H]1CCCN1C([C@@H](NC([C@@H]2CC(NCC(N[C@H](C(N[C@H](C(NCC(NCC(N[C@H](C(N[C@H](C(N2)=O)C(C)C)=O)[C@H](O)C)=O)=O)=O)CO)=O)CC(C)C)=O)=O)=O)C)=O)=O)C)=O)=O)CCC(N)=O)=O)=O)C
JANP01	RESPIRATORY	Staphylococcus aureus LCT-SAS	[u'RIBOSOMAL']	[u'CLASS_I_LANTIPEPTIDE']	3	105_["Lanthionine containing peptide","HYICIN M51"]	0.952381	O=C(N)CC5NC(=O)C(NC(=O)C(NC(=O)CNC(=O)C(=CC)NC(=O)C(NC(=O)C(NC(=O)C3NC(=O)CNC(=O)C4N(C(=O)C(NC(=O)C1NC(=O)C(NC(=O)C(=C)NC(=O)C(NC(=O)C(NC(=O)C(=CC)NC(=O)C(N)C(C)CC)CSC1)Cc2ccccc2)CC(C)C)C(C)SC3)CCC4)C)CCCCN)CSCC6NC(=O)C(NC(=O)C(NC5(=O))CSC=CNC6(=O))Cc7ccc(O)cc7)Cc8ccccc8
LSEU01	URINE	Escherichia coli	[u'RIBOSOMAL']	[u'LINEAR_AZOLE_CONTAINING_PEPTIDE']	1	601_["MccB17","MICROCIN B17","MICROCIN 17W"]	1	O=C(O)C(N=C(O)C(N=C(O)C(N=C(O)CN=C(O)c1nc(oc1)CN=C(O)CN=C(O)c2nc(oc2)CN=C(O)CN=C(O)C(N=C(O)CN=C(O)CN=C(O)c3nc(oc3)c8nc(CN=C(O)C(N=C(O)C(N=C(O)c7nc(CN=C(O)CN=C(O)c6nc(CN=C(O)CN=C(O)CN=C(O)C(N=C(O)CN=C(O)CN=C(O)c5nc(c4nc(oc4)CN=C(O)CN=C(O)CN=C(O)CN=C(O)CN=C(O)CN=C(O)CN=C(O)CN=C(O)CN=C(O)CN=C(O)C(N=C(O)CN=C(O)C(N)C(C)C)C(C)CC)sc5)CCC(=N)O)sc6)sc7)CO)CC(=N)O)sc8)CC(=N)O)CO)Cc9cnc[nH]9)C(C)CC
JPTY01	URINE	Enterococcus faecalis	[u'RIBOSOMAL']	[u'CLASS_II_LANTIPEPTIDE']	2	138_["Cytolysin LL"]	1	NC(C(N/C(C(N1CCCC1C(NC(C(NC(CS2)C(NC(C)C(NC(C(NC(C)C(NC(C)C(N/C(C(NC(C)C(NC(C)C(NC(C)C(NC(C(NC(C(NC(C)C(NC3C)=O)=O)=C)=O)CSCC(C(NCC(NC(CC4=CNC5=C4C=CC=C5)C(NC(C(NCC(NCC(NCC(NC(C(CC)C)C(NC(CC6=CC=CC=C6)C(NC(C(NCC(NC(C(N/C(C(NC(C(NC(C(NC(C(NC(C(NC(C(NC(C(NC7CC8=CN=CN8)=O)CCCCN)=O)CC(C)C)=O)CSCC(C(O)=O)NC7=O)=O)C(C)C)=O)C(C)C)=O)C(C)C)=O)=C/C)=O)C(C)C)=O)=O)C(C)O)=O)=O)=O)=O)=O)=O)C(C)C)=O)=O)=O)NC3…
JPTY01	URINE	Enterococcus faecalis	[u'RIBOSOMAL']	[u'LASSO_PEPTIDE']	3	546_["MICROVIRIDIN-B"]	0.555556	[H]C(O)(C)C([H])(NC(=O)CNC(=O)C([H])(NC(=O)C)Cc1ccccc1)C(=O)NC7([H])(C(=O)NC([H])(C(=O)NC3([H])(C(=O)NC([H])(C(=O)N8CCCC8([H])(C(=O)NC4([H])(C(=O)NC([H])(C(=O)NC([H])(C(=O)NC([H])(C(=O)NC([H])(C(=O)NC([H])(C(=O)O)Cc2ccc(O)cc2)CCC(=O)NCCCC3)CCC(=O)OC4)Cc5cc6ccccc6([nH]5))CC(=O)OC7([H])(C))))Cc9ccc(O)cc9))CC(C)C)
AXDQ01	GI	Lactobacillus plantarum LP91	[u'RIBOSOMAL']	[u'CLASS_II_BACTERIOCIN']	1	70_Plantaricin A	1		MLQFEKLQYSRLPQKKLAKISGGFNRGGYNFGKSVRHVVDAIGSVAGIRGILKSIR
AHSC01	ORAL	Streptococcus mutans G123	[u'RIBOSOMAL']	[u'CLASS_II_LANTIPEPTIDE']	3	127_["VARIACIN"]	0.688889	CCC(C(C(NC(C(NC(C(NC(C(NC(C(NC(C(NC(C(NC(C(NC(C(NC(C(NC(C(NC(C(NC(C(NC(C(N/C1=C/C)=O)Cc2ccccc2)=O)C(C)C)=O)Cc3ccccc3)=O)CCC(N)=O)=O)Cc4ccccc4)=O)CSCC(C(NC(C(O)=O)=C)=O)NC5=O)=O)CC(N)=O)=O)CCSC)=O)Cc6nc[nH]c6)=O)CS7)=O)CCC(O)=O)=O)Cc8nc[nH]c8)=O)CSCC5NC1=O)=O)NC(C(C7C)NC(C9CCCN9C(C(C(CC)C)NC(C(C(C)C)NC(CNC(C(NC(CN)=O)=C)=O)=O)=O)=O)=O)=O)C
LNOT01	STOOL	Enterococcus faecium	[u'RIBOSOMAL']	[u'CLASS_II_BACTERIOCIN']	2	16_Bacteriocin T8	1		MKKKVLKHCVILGILGTCLAGIGTGIKVDAATYYGNGLYCNKEKCWVDWNQAKGEIGKIIVNGWVNHGPWAPRR
LNMM01	STOOL	Enterococcus faecium	[u'RIBOSOMAL']	[u'CLASS_II_BACTERIOCIN']	1	16_Bacteriocin T8	1		MKKKVLKHCVILGILGTCLAGIGTGIKVDAATYYGNGLYCNKEKCWVDWNQAKGEIGKIIVNGWVNHGPWAPRR
LNMM01	STOOL	Enterococcus faecium	[u'RIBOSOMAL']	[u'CLASS_II_BACTERIOCIN']	2	40_Enterocin A	1		MKHLKILSIKETQLIYGGTTHSGKYYGNGVYCTKNKCTVDWAKATTCIAGMSIGGFLGGAIPGKC
AGKI01	ORAL	Streptococcus mutans TCI-110	[u'RIBOSOMAL']	[u'CLASS_II_BACTERIOCIN']	2	69_Antimicrobial protein BL-A60	0.545455		MLVDILTIKKGGIHMNTRMMEQFETMDAETLSHVTGGGLYDGANGYAYRDSQGHWAYKVTKTPAQALTDVVVNSWASGAASFAAYA
LFVP01	SKIN	Staphylococcus aureus subsp. aureus	[u'RIBOSOMAL']	[u'CLASS_I_LANTIPEPTIDE']	4	105_["Lanthionine containing peptide","HYICIN M51"]	0.952381	O=C(N)CC5NC(=O)C(NC(=O)C(NC(=O)CNC(=O)C(=CC)NC(=O)C(NC(=O)C(NC(=O)C3NC(=O)CNC(=O)C4N(C(=O)C(NC(=O)C1NC(=O)C(NC(=O)C(=C)NC(=O)C(NC(=O)C(NC(=O)C(=CC)NC(=O)C(N)C(C)CC)CSC1)Cc2ccccc2)CC(C)C)C(C)SC3)CCC4)C)CCCCN)CSCC6NC(=O)C(NC(=O)C(NC5(=O))CSC=CNC6(=O))Cc7ccc(O)cc7)Cc8ccccc8
JMVL01	URINE	Escherichia coli BIDMC 79	[u'RIBOSOMAL']	[u'LINEAR_AZOLE_CONTAINING_PEPTIDE']	5	601_["MccB17","MICROCIN B17","MICROCIN 17W"]	1	O=C(O)C(N=C(O)C(N=C(O)C(N=C(O)CN=C(O)c1nc(oc1)CN=C(O)CN=C(O)c2nc(oc2)CN=C(O)CN=C(O)C(N=C(O)CN=C(O)CN=C(O)c3nc(oc3)c8nc(CN=C(O)C(N=C(O)C(N=C(O)c7nc(CN=C(O)CN=C(O)c6nc(CN=C(O)CN=C(O)CN=C(O)C(N=C(O)CN=C(O)CN=C(O)c5nc(c4nc(oc4)CN=C(O)CN=C(O)CN=C(O)CN=C(O)CN=C(O)CN=C(O)CN=C(O)CN=C(O)CN=C(O)CN=C(O)C(N=C(O)CN=C(O)C(N)C(C)C)C(C)CC)sc5)CCC(=N)O)sc6)sc7)CO)CC(=N)O)sc8)CC(=N)O)CO)Cc9cnc[nH]9)C(C)CC
JGQQ01	STOOL	Staphylococcus aureus DAR3928	[u'RIBOSOMAL']	[u'BACTERIAL_HEAD_TO_TAIL_CYCLIZED']	2	595_Syanodin I	0.590909	CC(C[C@@H](C(N[C@H](C(NCC(O)=O)=O)C)=O)NC(CNC([C@@H](NC(CNC([C@@H](NC([C@@H]1CCCN1C([C@@H](NC([C@@H]2CC(NCC(N[C@H](C(N[C@H](C(NCC(NCC(N[C@H](C(N[C@H](C(N2)=O)C(C)C)=O)[C@H](O)C)=O)=O)=O)CO)=O)CC(C)C)=O)=O)=O)C)=O)=O)C)=O)=O)CCC(N)=O)=O)=O)C
ALZH01	ORAL	Streptococcus mutans B115SM-A	[u'RIBOSOMAL']	[u'CLASS_II_BACTERIOCIN']	4	69_Antimicrobial protein BL-A60	0.545455		MLVDILTIKKGGIHMNTRMMEQFETMDAETLSHVTGGGLYDGANGYAYRDSQGHWAYKVTKTPAQALTDVVVNSWASGAASFAAYA
ALZH01	ORAL	Streptococcus mutans B115SM-A	[u'RIBOSOMAL']	[u'CLASS_II_LANTIPEPTIDE']	8	129_["streptococcin A-M49"]	0.804348	CCC(C(C(NC(C(NC(C(NC(C(NC(C(NC(C(NC(C(NC(C(NC1C(NC(C(NC(C(NC(C(NC(C(NC(C(N/C2=C\C)=O)C)=O)CC(C)C)=O)Cc3ccccc3)=O)C)=O)CC4=CNc5c4cccc5)=O)=O)CC(N)=O)=O)CC(C)C)=O)Cc6nc[nH]c6)=O)CS7)=O)CCC(O)=O)=O)Cc8nc[nH]c8)=O)CSCC(C(NC(C(NC(C(O)=O)=C)=O)CSC1C)=O)NC2=O)=O)NC(C(C7C)NC(C(NC(C(NC(C(C(C)C)NC(CNC(C(NC(C(NC(CN)=O)CCCCN)=O)CC(N)=O)=O)=O)=O)Cc9ccccc9)=O)CCCCN)=O)=O)C
JRHN01	STOOL	Clostridioides difficile	[u'RIBOSOMAL']	[u'CLASS_I_LANTIPEPTIDE']	1	186_cerecidin A7	0.685714	N[C@H](C(N/C(C(N1CCC[C@H]1C(N[C@H](C(N[C@@H](CS2)C(N[C@H](C(NCC(N[C@H](C(N[C@@H]([C@H](CC)C)C(N[C@@H]([C@H](CC)C)C(NCC(N[C@@H]([C@H](CC)C)C(N/C(C(N[C@@H](C)C(N[C@H](C(N[C@@H]([C@H](CC)C)C(N[C@H](C(N[C@H]3[C@H](CC)C)=O)CCCCN)=O)=O)CSC[C@@H](C(N[C@H](C(O)=O)CCCCN)=O)NC3=O)=O)=O)=C/C)=O)=O)=O)=O)=O)C(C)C)=O)=O)C(C)C)=O)=O)CC(C)C)=O)=O)=C\C)=O)C2C
AHRE01	ORAL	Streptococcus mutans SA41	[u'RIBOSOMAL']	[u'CLASS_II_BACTERIOCIN']	3	69_Antimicrobial protein BL-A60	0.545455		MLVDILTIKKGGIHMNTRMMEQFETMDAETLSHVTGGGLYDGANGYAYRDSQGHWAYKVTKTPAQALTDVVVNSWASGAASFAAYA
LFVD01	SKIN	Staphylococcus aureus subsp. aureus	[u'RIBOSOMAL']	[u'CLASS_I_LANTIPEPTIDE']	4	105_["Lanthionine containing peptide","HYICIN M51"]	0.952381	O=C(N)CC5NC(=O)C(NC(=O)C(NC(=O)CNC(=O)C(=CC)NC(=O)C(NC(=O)C(NC(=O)C3NC(=O)CNC(=O)C4N(C(=O)C(NC(=O)C1NC(=O)C(NC(=O)C(=C)NC(=O)C(NC(=O)C(NC(=O)C(=CC)NC(=O)C(N)C(C)CC)CSC1)Cc2ccccc2)CC(C)C)C(C)SC3)CCC4)C)CCCCN)CSCC6NC(=O)C(NC(=O)C(NC5(=O))CSC=CNC6(=O))Cc7ccc(O)cc7)Cc8ccccc8
AHRZ01	ORAL	Streptococcus mutans NMT4863	[u'RIBOSOMAL']	[u'CLASS_II_BACTERIOCIN']	6	69_Antimicrobial protein BL-A60	0.545455		MNTKMMEQFETMDAETLSHVTGGGLYDGANGYAYRDSQGHWAYKVTKTPAQALTDVVVNSWASGAASFAAYA
JGOU01	RESPIRATORY	Staphylococcus aureus DAR3617	[u'RIBOSOMAL']	[u'BACTERIAL_HEAD_TO_TAIL_CYCLIZED']	3	569_["XANTHOMONIN II"]	0.578947	CC(C)C[C@@H](C(N[C@@H](C)C(NCC(N[C@H](C(N[C@H](C(N[C@@H](CCSC)C(NCC(NCC(N[C@@H]([C@H](CC)C)C(N[C@H](C(N[C@H](C(O)=O)[C@@H](C)O)=O)[C@@H](C)O)=O)=O)=O)=O)=O)CCC(O)=O)=O)CC1)=O)=O)=O)NC([C@@H]2CCCN2C(CNC(CNC1=O)=O)=O)=O
JGQN01	EYE	Staphylococcus aureus DAR3918	[u'RIBOSOMAL']	[u'BACTERIAL_HEAD_TO_TAIL_CYCLIZED']	3	595_Syanodin I	0.590909	CC(C[C@@H](C(N[C@H](C(NCC(O)=O)=O)C)=O)NC(CNC([C@@H](NC(CNC([C@@H](NC([C@@H]1CCCN1C([C@@H](NC([C@@H]2CC(NCC(N[C@H](C(N[C@H](C(NCC(NCC(N[C@H](C(N[C@H](C(N2)=O)C(C)C)=O)[C@H](O)C)=O)=O)=O)CO)=O)CC(C)C)=O)=O)=O)C)=O)=O)C)=O)=O)CCC(N)=O)=O)=O)C
LNML01	STOOL	Enterococcus faecium	[u'RIBOSOMAL']	[u'CLASS_II_BACTERIOCIN']	2	16_Bacteriocin T8	1		MKKKVLKHCVILGILGTCLAGIGTGIKVDAATYYGNGLYCNKEKCWVDWNQAKGEIGKIIVNGWVNHGPWAPRR
LNML01	STOOL	Enterococcus faecium	[u'RIBOSOMAL']	[u'CLASS_II_BACTERIOCIN']	4	40_Enterocin A	1		MKHLKILSIKETQLIYGGTTHSGKYYGNGVYCTKNKCTVDWAKATTCIAGMSIGGFLGGAIPGKC
LNOZ01	STOOL	Enterococcus faecium	[u'RIBOSOMAL']	[u'CLASS_II_BACTERIOCIN']	1	40_Enterocin A	1		MKHLKILSIKETQLIYGGTTHSGKYYGNGVYCTKNKCTVDWAKATTCIAGMSIGGFLGGAIPGKC
LNOZ01	STOOL	Enterococcus faecium	[u'RIBOSOMAL']	[u'CLASS_II_BACTERIOCIN']	3	16_Bacteriocin T8	1		MKKKVLKHCVILGILGTCLAGIGTGIKVDAATYYGNGLYCNKEKCWVDWNQAKGEIGKIIVNGWVNHGPWAPRR
CDVQ01	CSF	Streptococcus suis	[u'RIBOSOMAL']	[u'CLASS_I_LANTIPEPTIDE']	1	148_["NISIN U"]	0.941176	CCC(C(C(N/C(C(NC(C(NC(C(NC(C(NC1CC(C)C)=O)=C)=O)CCCCN)=O)CSCC(C(NC(C(N2CCCC2C(NCC(NC(C(NC(C(NC(C(NCC(NC(C(NC(C(NC(C(N/C(C(NC(C(N3CCCC3C(NC(C(NC(C(NC(C(NC(C(NC(C(NC(C(NCC(NC(C(NC(C(NC(C(NCC(O)=O)=O)Cc4ccccc4)=O)Cc5nc[nH]c5)=O)CS6)=O)=O)CS7)=O)C6C)=O)C)=O)C7C)=O)CCCCN)=O)CC(C)C)=O)=O)CS8)=O)=C\C)=O)CCSC)=O)CC(C)C)=O)C(CC)C)=O)=O)C8C)=O)CCCCN)=O)CS9)=O)=O)=O)C9C)=O)NC1=O)=O)=C\C)=O)N)C
CDSW01	CSF	Streptococcus suis	[u'RIBOSOMAL']	[u'CLASS_I_LANTIPEPTIDE']	2	148_["NISIN U"]	0.941176	CCC(C(C(N/C(C(NC(C(NC(C(NC(C(NC1CC(C)C)=O)=C)=O)CCCCN)=O)CSCC(C(NC(C(N2CCCC2C(NCC(NC(C(NC(C(NC(C(NCC(NC(C(NC(C(NC(C(N/C(C(NC(C(N3CCCC3C(NC(C(NC(C(NC(C(NC(C(NC(C(NC(C(NCC(NC(C(NC(C(NC(C(NCC(O)=O)=O)Cc4ccccc4)=O)Cc5nc[nH]c5)=O)CS6)=O)=O)CS7)=O)C6C)=O)C)=O)C7C)=O)CCCCN)=O)CC(C)C)=O)=O)CS8)=O)=C\C)=O)CCSC)=O)CC(C)C)=O)C(CC)C)=O)=O)C8C)=O)CCCCN)=O)CS9)=O)=O)=O)C9C)=O)NC1=O)=O)=C\C)=O)N)C
CEBS01	CSF	Streptococcus suis	[u'RIBOSOMAL']	[u'CLASS_II_LANTIPEPTIDE']	1	88_["A-3802-VI-7"]	0.678571	O=C(O)CCC4NC(=O)C(NC(=O)C6NC(=O)C(NC(=O)C(NC(=O)C1NC(=O)C(NC(=O)C(NC(=O)CNC(=O)C(NC(=O)C(NC(=O)C)CSC1)CO)Cc3c[nH]c2ccccc23)C(C)C)C(C)SCC(NC4(=O))C(=O)NCC(=O)NC5C(=O)NC(C(=O)NC(C(=O)NC(C(=O)NC(C(=O)NC(C(=O)OC)CS(=O)C5(C))C)CSC6(C))C(C)CC)C(C)C)CC(C)C)C(C)CC
LFVH01	SKIN	Staphylococcus aureus subsp. aureus	[u'RIBOSOMAL']	[u'CLASS_I_LANTIPEPTIDE']	4	105_["Lanthionine containing peptide","HYICIN M51"]	0.952381	O=C(N)CC5NC(=O)C(NC(=O)C(NC(=O)CNC(=O)C(=CC)NC(=O)C(NC(=O)C(NC(=O)C3NC(=O)CNC(=O)C4N(C(=O)C(NC(=O)C1NC(=O)C(NC(=O)C(=C)NC(=O)C(NC(=O)C(NC(=O)C(=CC)NC(=O)C(N)C(C)CC)CSC1)Cc2ccccc2)CC(C)C)C(C)SC3)CCC4)C)CCCCN)CSCC6NC(=O)C(NC(=O)C(NC5(=O))CSC=CNC6(=O))Cc7ccc(O)cc7)Cc8ccccc8
JNLZ01	STOOL	Escherichia coli 3-105-05_S1_C1	[u'RIBOSOMAL']	[u'LINEAR_AZOLE_CONTAINING_PEPTIDE']	3	601_["MccB17","MICROCIN B17","MICROCIN 17W"]	1	O=C(O)C(N=C(O)C(N=C(O)C(N=C(O)CN=C(O)c1nc(oc1)CN=C(O)CN=C(O)c2nc(oc2)CN=C(O)CN=C(O)C(N=C(O)CN=C(O)CN=C(O)c3nc(oc3)c8nc(CN=C(O)C(N=C(O)C(N=C(O)c7nc(CN=C(O)CN=C(O)c6nc(CN=C(O)CN=C(O)CN=C(O)C(N=C(O)CN=C(O)CN=C(O)c5nc(c4nc(oc4)CN=C(O)CN=C(O)CN=C(O)CN=C(O)CN=C(O)CN=C(O)CN=C(O)CN=C(O)CN=C(O)CN=C(O)C(N=C(O)CN=C(O)C(N)C(C)C)C(C)CC)sc5)CCC(=N)O)sc6)sc7)CO)CC(=N)O)sc8)CC(=N)O)CO)Cc9cnc[nH]9)C(C)CC
CDTM01	CSF	Streptococcus suis	[u'RIBOSOMAL']	[u'CLASS_II_LANTIPEPTIDE']	1	88_["A-3802-VI-7"]	0.678571	O=C(O)CCC4NC(=O)C(NC(=O)C6NC(=O)C(NC(=O)C(NC(=O)C1NC(=O)C(NC(=O)C(NC(=O)CNC(=O)C(NC(=O)C(NC(=O)C)CSC1)CO)Cc3c[nH]c2ccccc23)C(C)C)C(C)SCC(NC4(=O))C(=O)NCC(=O)NC5C(=O)NC(C(=O)NC(C(=O)NC(C(=O)NC(C(=O)NC(C(=O)OC)CS(=O)C5(C))C)CSC6(C))C(C)CC)C(C)C)CC(C)C)C(C)CC
LOLI01	RESPIRATORY	Legionella pneumophila	[u'RIBOSOMAL']	[u'LASSO_PEPTIDE']	2	276_["PRE-T","10381-T","PRE-10381-T"]	0.571429	O=C(N)c3nc4c1nc(oc1C)C(NC(=O)c6nc(C(NC(=O)c2nc(oc2C)CNC(=O)C(NC(=O)c5nc(c4(cc3))sc5)C(C)C)C)sc6)C
LNMP01	STOOL	Enterococcus faecium	[u'RIBOSOMAL']	[u'CLASS_II_BACTERIOCIN']	4	40_Enterocin A	1		MKHLKILSIKETQLIYGGTTHSGKYYGNGVYCTKNKCTVDWAKATTCIAGMSIGGFLGGAIPGKC
LNMP01	STOOL	Enterococcus faecium	[u'RIBOSOMAL']	[u'CLASS_II_BACTERIOCIN']	5	16_Bacteriocin T8	1		MKKKVLKHCVILGILGTCLAGIGTGIKVDAATYYGNGLYCNKEKCWVDWNQAKGEIGKIIVNGWVNHGPWAPRR
AGLI01	ORAL	Streptococcus mutans TCI-201	[u'RIBOSOMAL']	[u'CLASS_II_BACTERIOCIN']	2	69_Antimicrobial protein BL-A60	0.545455		MLVDILTIKKGGIHMNTRMMEQFETMNAETLSHVTGGGLYDGANGYAYRDSQGHWAYKVTKTPAQALTDVVVNSWASGAASFAAYA
CECL01	CSF	Streptococcus suis	[u'RIBOSOMAL']	[u'CLASS_II_LANTIPEPTIDE']	1	88_["A-3802-VI-7"]	0.678571	O=C(O)CCC4NC(=O)C(NC(=O)C6NC(=O)C(NC(=O)C(NC(=O)C1NC(=O)C(NC(=O)C(NC(=O)CNC(=O)C(NC(=O)C(NC(=O)C)CSC1)CO)Cc3c[nH]c2ccccc23)C(C)C)C(C)SCC(NC4(=O))C(=O)NCC(=O)NC5C(=O)NC(C(=O)NC(C(=O)NC(C(=O)NC(C(=O)NC(C(=O)OC)CS(=O)C5(C))C)CSC6(C))C(C)CC)C(C)C)CC(C)C)C(C)CC
LNLM01	STOOL	Enterococcus faecium	[u'RIBOSOMAL']	[u'CLASS_II_BACTERIOCIN']	1	16_Bacteriocin T8	1		MKKKVLKHCVILGILGTCLAGIGTGIKVDAATYYGNGLYCNKEKCWVDWNQAKGEIGKIIVNGWVNHGPWAPRR
AHRB01	ORAL	Streptococcus mutans 8ID3	[u'RIBOSOMAL']	[u'CLASS_II_BACTERIOCIN']	4	69_Antimicrobial protein BL-A60	0.545455		MNTKMMEQFETMDAETLSHVTGGGLYDGANGYAYRDSQGHWAYKVTKTPAQALTDVVVNSWASGAASFAAYA
CDSX01	CSF	Streptococcus suis	[u'RIBOSOMAL']	[u'CLASS_I_LANTIPEPTIDE']	1	148_["NISIN U"]	0.941176	CCC(C(C(N/C(C(NC(C(NC(C(NC(C(NC1CC(C)C)=O)=C)=O)CCCCN)=O)CSCC(C(NC(C(N2CCCC2C(NCC(NC(C(NC(C(NC(C(NCC(NC(C(NC(C(NC(C(N/C(C(NC(C(N3CCCC3C(NC(C(NC(C(NC(C(NC(C(NC(C(NC(C(NCC(NC(C(NC(C(NC(C(NCC(O)=O)=O)Cc4ccccc4)=O)Cc5nc[nH]c5)=O)CS6)=O)=O)CS7)=O)C6C)=O)C)=O)C7C)=O)CCCCN)=O)CC(C)C)=O)=O)CS8)=O)=C\C)=O)CCSC)=O)CC(C)C)=O)C(CC)C)=O)=O)C8C)=O)CCCCN)=O)CS9)=O)=O)=O)C9C)=O)NC1=O)=O)=C\C)=O)N)C
LOIY01	STOOL	Escherichia coli	[u'RIBOSOMAL']	[u'LINEAR_AZOLE_CONTAINING_PEPTIDE']	2	601_["MccB17","MICROCIN B17","MICROCIN 17W"]	0.924528	O=C(O)C(N=C(O)C(N=C(O)C(N=C(O)CN=C(O)c1nc(oc1)CN=C(O)CN=C(O)c2nc(oc2)CN=C(O)CN=C(O)C(N=C(O)CN=C(O)CN=C(O)c3nc(oc3)c8nc(CN=C(O)C(N=C(O)C(N=C(O)c7nc(CN=C(O)CN=C(O)c6nc(CN=C(O)CN=C(O)CN=C(O)C(N=C(O)CN=C(O)CN=C(O)c5nc(c4nc(oc4)CN=C(O)CN=C(O)CN=C(O)CN=C(O)CN=C(O)CN=C(O)CN=C(O)CN=C(O)CN=C(O)CN=C(O)C(N=C(O)CN=C(O)C(N)C(C)C)C(C)CC)sc5)CCC(=N)O)sc6)sc7)CO)CC(=N)O)sc8)CC(=N)O)CO)Cc9cnc[nH]9)C(C)CC
AVAL01	RESPIRATORY	Burkholderia pseudomallei HBPUB10134a	[u'RIBOSOMAL']	[u'LASSO_PEPTIDE']	24	561_["CAPISTRUIN"]	0.875	O[C@H](C)[C@@H](C(N1CCC[C@H]1C(NCC(N[C@@H](CC2=CC=CC=C2)C(N[C@H](C(N[C@H](C(N3CCC[C@H]3C(N[C@@H](C4)C(N[C@@H](C)C(N[C@H](C(N[C@H](C(N[C@@H]([C@H](CC)C)C(N[C@H](C(N[C@H](C(N[C@@H](CC5=CC=CC=C5)C(NCC(N[C@@H](CC6=CC=CC=C6)C(N[C@H](C(O)=O)CC(N)=O)=O)=O)=O)=O)CCCNC(N)=N)=O)CO)=O)=O)C(C)C)=O)CCCNC(N)=N)=O)=O)=O)=O)[C@@H](C)O)=O)CCC(N)=O)=O)=O)=O)=O)NC(CNC4=O)=O
AMAB01	RESPIRATORY	Staphylococcus aureus subsp. aureus CM05	[u'RIBOSOMAL']	[u'BACTERIAL_HEAD_TO_TAIL_CYCLIZED']	1	595_Syanodin I	0.590909	CC(C[C@@H](C(N[C@H](C(NCC(O)=O)=O)C)=O)NC(CNC([C@@H](NC(CNC([C@@H](NC([C@@H]1CCCN1C([C@@H](NC([C@@H]2CC(NCC(N[C@H](C(N[C@H](C(NCC(NCC(N[C@H](C(N[C@H](C(N2)=O)C(C)C)=O)[C@H](O)C)=O)=O)=O)CO)=O)CC(C)C)=O)=O)=O)C)=O)=O)C)=O)=O)CCC(N)=O)=O)=O)C
LNDL01	STOOL	Enterococcus faecium	[u'RIBOSOMAL']	[u'CLASS_II_BACTERIOCIN']	1	16_Bacteriocin T8	1		MKKKVLKHCVILGILGTCLAGIGTGIKVDAATYYGNGLYCNKEKCWVDWNQAKGEIGKIIVNGWVNHGPWAPRR
LNDL01	STOOL	Enterococcus faecium	[u'RIBOSOMAL']	[u'CLASS_II_BACTERIOCIN']	2	40_Enterocin A	1		MKHLKILSIKETQLIYGGTTHSGKYYGNGVYCTKNKCTVDWAKATTCIAGMSIGGFLGGAIPGKC
MAKH01	URINE	Lactobacillus crispatus	[u'RIBOSOMAL']	[u'CLASS_III_BACTERIOCIN']	3	69_Antimicrobial protein BL-A60	0.636364		MKHLNETTNVNILSQFDLGTGYQAVVQKGNVGKKYVYALQLRKGVTTILRGYRGNKINSPILKLSDQAGGHTQTWEFAGNHKDINGNDRAGQWFVGVKPTKIQGSDIIWARQMARVDINTQAGPHADNTDFPRLSYLNRAGANPYAGKVMTHAEAAVSPNYKKFLIATIENNRIGHFTIYDLDKINQALDKSGKYKDVSLDGFEYEDSFTINNLYGNAEDAVVNSIQGYDLDNDGNIYISSQKAPDFDGSYHAYHKQIVKIPWNGRSETKEDQWESVNLSAFGGLDISKKHSEVESIQILSENHCYLTVAYHSKLDGKNKTTLNRIYELSWS
ALYO01	ORAL	Streptococcus mutans B05Sm11	[u'RIBOSOMAL']	[u'CLASS_II_LANTIPEPTIDE']	1	127_["VARIACIN"]	0.688889	CCC(C(C(NC(C(NC(C(NC(C(NC(C(NC(C(NC(C(NC(C(NC(C(NC(C(NC(C(NC(C(NC(C(NC(C(N/C1=C/C)=O)Cc2ccccc2)=O)C(C)C)=O)Cc3ccccc3)=O)CCC(N)=O)=O)Cc4ccccc4)=O)CSCC(C(NC(C(O)=O)=C)=O)NC5=O)=O)CC(N)=O)=O)CCSC)=O)Cc6nc[nH]c6)=O)CS7)=O)CCC(O)=O)=O)Cc8nc[nH]c8)=O)CSCC5NC1=O)=O)NC(C(C7C)NC(C9CCCN9C(C(C(CC)C)NC(C(C(C)C)NC(CNC(C(NC(CN)=O)=C)=O)=O)=O)=O)=O)=O)C
ALYO01	ORAL	Streptococcus mutans B05Sm11	[u'RIBOSOMAL']	[u'CLASS_II_BACTERIOCIN']	6	69_Antimicrobial protein BL-A60	0.545455		MLVDILTIKKGGIHMNTRMMEQFETMDAETLSHVTGGGLYDGANGYAYRDSQGHWAYKVTKTPAQALTDVVVNSWASGAASFAAYA
LTQS01	URINE	Enterococcus sp. HMSC060D07	[u'RIBOSOMAL']	[u'CLASS_II_BACTERIOCIN']	3	40_Enterocin A	1		MKHLKILSIKETQLIYGGTTHSGKYYGNGVYCTKNKCTVDWAKATTCIAGMSIGGFLGGAIPGKC
AHSL01	ORAL	Streptococcus mutans N3209	[u'RIBOSOMAL']	[u'CLASS_II_BACTERIOCIN']	5	69_Antimicrobial protein BL-A60	0.545455		MLVDILTIKKGGIHMNTKMMEQFETMDAETLSHVTGGGLYDGANGYAYRDSQGHWAYKVTKTPAQALTDVVVNSWASGAASFAAYA
JYMF01	RESPIRATORY	Enterobacter cloacae	[u'RIBOSOMAL']	[u'CLASS_II_BACTERIOCIN']	2	23_Halocin-C8	0.533333		MSNIKELTLSEIELVSGGGNSGDHEHNFNSHSETGARNTLGRNAPTHIYSDPDTSRCGDAVFSGMVGGAIKGGLVGMARGTIGGAVTGQCLSGGGNGNGGGNTAGSSHCSGGDIGGTCSR
LTJH01	EYE	Staphylococcus sp. HMSC055A09	[u'RIBOSOMAL']	[u'CLASS_I_LANTIPEPTIDE']	2	106_["Lanthionine containing peptide","HYICIN M51"]	0.666667	O=C(N)CC5NC(=O)C(NC(=O)C(NC(=O)CNC(=O)C(=CC)NC(=O)C(NC(=O)C(NC(=O)C3NC(=O)CNC(=O)C4N(C(=O)C(NC(=O)C1NC(=O)C(NC(=O)C(NC(=O)C(=C)NC(=O)C(NC(=O)C(=CC)NC(=O)C(N)C(C)CC)CSC1)Cc2ccccc2)CC(C)C)C(C)SC3)CCC4)C)CCCCN)CSCC6NC(=O)C(NC(=O)C(NC5(=O))CSC=CNC6(=O))Cc7ccc(O)cc7)Cc8ccccc8
JQHE01	RESPIRATORY	Rothia dentocariosa	[u'RIBOSOMAL']	[u'CLASS_II_LANTIPEPTIDE', u'LASSO_PEPTIDE']	1	569_["XANTHOMONIN II"]	0.684211	CC(C)C[C@@H](C(N[C@@H](C)C(NCC(N[C@H](C(N[C@H](C(N[C@@H](CCSC)C(NCC(NCC(N[C@@H]([C@H](CC)C)C(N[C@H](C(N[C@H](C(O)=O)[C@@H](C)O)=O)[C@@H](C)O)=O)=O)=O)=O)=O)CCC(O)=O)=O)CC1)=O)=O)=O)NC([C@@H]2CCCN2C(CNC(CNC1=O)=O)=O)=O
JGJE01	SKIN	Staphylococcus aureus F59335	[u'RIBOSOMAL']	[u'BACTERIAL_HEAD_TO_TAIL_CYCLIZED']	3	595_Syanodin I	0.590909	CC(C[C@@H](C(N[C@H](C(NCC(O)=O)=O)C)=O)NC(CNC([C@@H](NC(CNC([C@@H](NC([C@@H]1CCCN1C([C@@H](NC([C@@H]2CC(NCC(N[C@H](C(N[C@H](C(NCC(NCC(N[C@H](C(N[C@H](C(N2)=O)C(C)C)=O)[C@H](O)C)=O)=O)=O)CO)=O)CC(C)C)=O)=O)=O)C)=O)=O)C)=O)=O)CCC(N)=O)=O)=O)C
LABN01	STOOL	Bacillus cereus	[u'RIBOSOMAL']	[u'BACTERIAL_HEAD_TO_TAIL_CYCLIZED']	3	644_[Mechercharstatin_A,IB_01211,MECHERCHARMYCIN_A,MECHERCHASTATIN]	0.625	O=C(NC(C(CC)C)C(NC(C(C)C)C(NCc1occ(c2occ(c3occ(c4scc5n4)n3)n2)n1)=O)=O)c6c(c7ccccc7)oc5n6
LABN01	STOOL	Bacillus cereus	[u'RIBOSOMAL']	[u'SACTIPEPTIDE']	5	608_["THURICIN C"]	1	NCC(NC(C(NC(C)C(NC(C)C(NC(CS1)C(NC(C(NC(C(CC)C)C(NCC(NC(CS2)C(NC(C(CC)C)C(NCC(NC(C(NC(CS3)C(NC(C(C)C)C(NC(C(CC)C)C(NC(CO)C(NC(C(NCC(NC(C(C)CC)C(NCC(NC3(C(NC(C(NC(C(NCC(NC2(C(NC(C)C(NC(CC4=CC=CC=C4)C(NC1(C(NC(C(NCC(O)=O)=O)CC(C)C)=O)C(C)O)=O)=O)=O)C(C)O)=O)=O)C(C)C)=O)CC(C)C)=O)CO)=O)=O)=O)=O)CCC(O)=O)=O)=O)=O)=O)=O)CO)=O)=O)=O)=O)=O)=O)C(C)C)=O)=O)=O)=O)CC(N)=O)=O
ANML01	STOOL	Lactobacillus paracasei subsp. paracasei Lpp223	[u'RIBOSOMAL']	[u'CLASS_II_BACTERIOCIN']	1	545_["MICROVIRIDIN","MICROVIRIDIN-A"]	0.526316		MELLNEKELAHVIGGKRKCPKTPFDNTPGAWFAHLILGC
LFVF01	SKIN	Staphylococcus aureus subsp. aureus	[u'RIBOSOMAL']	[u'CLASS_I_LANTIPEPTIDE']	4	105_["Lanthionine containing peptide","HYICIN M51"]	0.952381	O=C(N)CC5NC(=O)C(NC(=O)C(NC(=O)CNC(=O)C(=CC)NC(=O)C(NC(=O)C(NC(=O)C3NC(=O)CNC(=O)C4N(C(=O)C(NC(=O)C1NC(=O)C(NC(=O)C(=C)NC(=O)C(NC(=O)C(NC(=O)C(=CC)NC(=O)C(N)C(C)CC)CSC1)Cc2ccccc2)CC(C)C)C(C)SC3)CCC4)C)CCCCN)CSCC6NC(=O)C(NC(=O)C(NC5(=O))CSC=CNC6(=O))Cc7ccc(O)cc7)Cc8ccccc8
JGRV01	RESPIRATORY	Staphylococcus aureus DAR1295	[u'RIBOSOMAL']	[u'BACTERIAL_HEAD_TO_TAIL_CYCLIZED']	3	595_Syanodin I	0.590909	CC(C[C@@H](C(N[C@H](C(NCC(O)=O)=O)C)=O)NC(CNC([C@@H](NC(CNC([C@@H](NC([C@@H]1CCCN1C([C@@H](NC([C@@H]2CC(NCC(N[C@H](C(N[C@H](C(NCC(NCC(N[C@H](C(N[C@H](C(N2)=O)C(C)C)=O)[C@H](O)C)=O)=O)=O)CO)=O)CC(C)C)=O)=O)=O)C)=O)=O)C)=O)=O)CCC(N)=O)=O)=O)C
JNMV01	STOOL	Escherichia coli 3-373-03_S1_C1	[u'RIBOSOMAL']	[u'LINEAR_AZOLE_CONTAINING_PEPTIDE']	4	601_["MccB17","MICROCIN B17","MICROCIN 17W"]	0.867925	O=C(O)C(N=C(O)C(N=C(O)C(N=C(O)CN=C(O)c1nc(oc1)CN=C(O)CN=C(O)c2nc(oc2)CN=C(O)CN=C(O)C(N=C(O)CN=C(O)CN=C(O)c3nc(oc3)c8nc(CN=C(O)C(N=C(O)C(N=C(O)c7nc(CN=C(O)CN=C(O)c6nc(CN=C(O)CN=C(O)CN=C(O)C(N=C(O)CN=C(O)CN=C(O)c5nc(c4nc(oc4)CN=C(O)CN=C(O)CN=C(O)CN=C(O)CN=C(O)CN=C(O)CN=C(O)CN=C(O)CN=C(O)CN=C(O)C(N=C(O)CN=C(O)C(N)C(C)C)C(C)CC)sc5)CCC(=N)O)sc6)sc7)CO)CC(=N)O)sc8)CC(=N)O)CO)Cc9cnc[nH]9)C(C)CC
LFVJ01	SKIN	Staphylococcus aureus subsp. aureus	[u'RIBOSOMAL']	[u'CLASS_I_LANTIPEPTIDE']	4	105_["Lanthionine containing peptide","HYICIN M51"]	0.952381	O=C(N)CC5NC(=O)C(NC(=O)C(NC(=O)CNC(=O)C(=CC)NC(=O)C(NC(=O)C(NC(=O)C3NC(=O)CNC(=O)C4N(C(=O)C(NC(=O)C1NC(=O)C(NC(=O)C(=C)NC(=O)C(NC(=O)C(NC(=O)C(=CC)NC(=O)C(N)C(C)CC)CSC1)Cc2ccccc2)CC(C)C)C(C)SC3)CCC4)C)CCCCN)CSCC6NC(=O)C(NC(=O)C(NC5(=O))CSC=CNC6(=O))Cc7ccc(O)cc7)Cc8ccccc8
AGKV01	ORAL	Streptococcus mutans TCI-154	[u'RIBOSOMAL']	[u'CLASS_II_BACTERIOCIN']	2	69_Antimicrobial protein BL-A60	0.545455		MLVDILTIKKGGIHMNTRMMEQFETMDAETLSHVTGGGLYDGANGYAYRDSQGHWAYKVTKTPAQALTDVVVNSWASGAASFAAYA
AZTG01	STOOL	Staphylococcus aureus JS046	[u'RIBOSOMAL']	[u'CLASS_I_LANTIPEPTIDE']	3	105_["Lanthionine containing peptide","HYICIN M51"]	0.952381	O=C(N)CC5NC(=O)C(NC(=O)C(NC(=O)CNC(=O)C(=CC)NC(=O)C(NC(=O)C(NC(=O)C3NC(=O)CNC(=O)C4N(C(=O)C(NC(=O)C1NC(=O)C(NC(=O)C(=C)NC(=O)C(NC(=O)C(NC(=O)C(=CC)NC(=O)C(N)C(C)CC)CSC1)Cc2ccccc2)CC(C)C)C(C)SC3)CCC4)C)CCCCN)CSCC6NC(=O)C(NC(=O)C(NC5(=O))CSC=CNC6(=O))Cc7ccc(O)cc7)Cc8ccccc8
LOCW01	STOOL	Escherichia coli	[u'RIBOSOMAL']	[u'LASSO_PEPTIDE']	2	564_["LARIATIN B"]	0.583333	OC[C@@H](C(N[C@H](C(N[C@H](C(N[C@H](C(N[C@@H](CC1=CC=C(C=C1)O)C(N[C@H](C(N[C@H](C(N[C@@H](CC2=CNC3=C2C=CC=C3)C(N[C@H](C(NCC(N[C@@H](CC4=CN=CN4)C(N[C@H](C(N[C@H](C(N[C@H](C(N[C@@H]([C@H](CC)C)C(N[C@H](C(N5CCC[C@H]5C(N6[C@H](C(O)=O)CCC6)=O)=O)CCCCN)=O)=O)C(C)C)=O)CC(N)=O)=O)CO)=O)=O)=O)C(C)C)=O)=O)CC7)=O)CCCNC(N)=N)=O)=O)C(C)C)=O)CC(C)C)=O)CCC(N)=O)=O)NC(CNC7=O)=O
JSMC01	URINE	Escherichia coli	[u'RIBOSOMAL']	[u'LINEAR_AZOLE_CONTAINING_PEPTIDE']	1	601_["MccB17","MICROCIN B17","MICROCIN 17W"]	1	O=C(O)C(N=C(O)C(N=C(O)C(N=C(O)CN=C(O)c1nc(oc1)CN=C(O)CN=C(O)c2nc(oc2)CN=C(O)CN=C(O)C(N=C(O)CN=C(O)CN=C(O)c3nc(oc3)c8nc(CN=C(O)C(N=C(O)C(N=C(O)c7nc(CN=C(O)CN=C(O)c6nc(CN=C(O)CN=C(O)CN=C(O)C(N=C(O)CN=C(O)CN=C(O)c5nc(c4nc(oc4)CN=C(O)CN=C(O)CN=C(O)CN=C(O)CN=C(O)CN=C(O)CN=C(O)CN=C(O)CN=C(O)CN=C(O)C(N=C(O)CN=C(O)C(N)C(C)C)C(C)CC)sc5)CCC(=N)O)sc6)sc7)CO)CC(=N)O)sc8)CC(=N)O)CO)Cc9cnc[nH]9)C(C)CC
CDWF01	CSF	Streptococcus suis	[u'RIBOSOMAL']	[u'CLASS_II_LANTIPEPTIDE']	2	88_["A-3802-VI-7"]	0.678571	O=C(O)CCC4NC(=O)C(NC(=O)C6NC(=O)C(NC(=O)C(NC(=O)C1NC(=O)C(NC(=O)C(NC(=O)CNC(=O)C(NC(=O)C(NC(=O)C)CSC1)CO)Cc3c[nH]c2ccccc23)C(C)C)C(C)SCC(NC4(=O))C(=O)NCC(=O)NC5C(=O)NC(C(=O)NC(C(=O)NC(C(=O)NC(C(=O)NC(C(=O)OC)CS(=O)C5(C))C)CSC6(C))C(C)CC)C(C)C)CC(C)C)C(C)CC
CDXF01	CSF	Streptococcus suis	[u'RIBOSOMAL']	[u'CLASS_II_LANTIPEPTIDE']	1	88_["A-3802-VI-7"]	0.678571	O=C(O)CCC4NC(=O)C(NC(=O)C6NC(=O)C(NC(=O)C(NC(=O)C1NC(=O)C(NC(=O)C(NC(=O)CNC(=O)C(NC(=O)C(NC(=O)C)CSC1)CO)Cc3c[nH]c2ccccc23)C(C)C)C(C)SCC(NC4(=O))C(=O)NCC(=O)NC5C(=O)NC(C(=O)NC(C(=O)NC(C(=O)NC(C(=O)NC(C(=O)OC)CS(=O)C5(C))C)CSC6(C))C(C)CC)C(C)C)CC(C)C)C(C)CC
LLYH01	GI	Escherichia coli	[u'RIBOSOMAL']	[u'LASSO_PEPTIDE']	1	547_["MICROVIRIDIN-C"]	0.611111	[H]C(O)(C)C([H])(NC(=O)CNC(=O)C([H])(NC(=O)C)Cc1ccccc1)C(=O)NC6([H])(C(=O)NC([H])(C(=O)NC3([H])(C(=O)NC([H])(C(=O)N7CCCC7([H])(C(=O)NC([H])(C(=O)NC([H])(C(=O)NC([H])(C(=O)NC([H])(C(=O)NC([H])(C(=O)NC([H])(C(=O)O)Cc2ccc(O)cc2)CCC(=O)NCCCC3)CCC(=O)OC)Cc4cc5ccccc5([nH]4))CC(=O)OC6([H])(C))CO))Cc8ccc(O)cc8))CC(C)C)
CEBO01	CSF	Streptococcus suis	[u'RIBOSOMAL']	[u'CLASS_II_LANTIPEPTIDE']	1	88_["A-3802-VI-7"]	0.678571	O=C(O)CCC4NC(=O)C(NC(=O)C6NC(=O)C(NC(=O)C(NC(=O)C1NC(=O)C(NC(=O)C(NC(=O)CNC(=O)C(NC(=O)C(NC(=O)C)CSC1)CO)Cc3c[nH]c2ccccc23)C(C)C)C(C)SCC(NC4(=O))C(=O)NCC(=O)NC5C(=O)NC(C(=O)NC(C(=O)NC(C(=O)NC(C(=O)NC(C(=O)OC)CS(=O)C5(C))C)CSC6(C))C(C)CC)C(C)C)CC(C)C)C(C)CC
JNMZ01	STOOL	Escherichia coli 4-203-08_S4_C3	[u'RIBOSOMAL']	[u'LINEAR_AZOLE_CONTAINING_PEPTIDE']	3	601_["MccB17","MICROCIN B17","MICROCIN 17W"]	0.924528	O=C(O)C(N=C(O)C(N=C(O)C(N=C(O)CN=C(O)c1nc(oc1)CN=C(O)CN=C(O)c2nc(oc2)CN=C(O)CN=C(O)C(N=C(O)CN=C(O)CN=C(O)c3nc(oc3)c8nc(CN=C(O)C(N=C(O)C(N=C(O)c7nc(CN=C(O)CN=C(O)c6nc(CN=C(O)CN=C(O)CN=C(O)C(N=C(O)CN=C(O)CN=C(O)c5nc(c4nc(oc4)CN=C(O)CN=C(O)CN=C(O)CN=C(O)CN=C(O)CN=C(O)CN=C(O)CN=C(O)CN=C(O)CN=C(O)C(N=C(O)CN=C(O)C(N)C(C)C)C(C)CC)sc5)CCC(=N)O)sc6)sc7)CO)CC(=N)O)sc8)CC(=N)O)CO)Cc9cnc[nH]9)C(C)CC
JGRS01	RESPIRATORY	Staphylococcus aureus DAR1278	[u'RIBOSOMAL']	[u'BACTERIAL_HEAD_TO_TAIL_CYCLIZED']	2	595_Syanodin I	0.590909	CC(C[C@@H](C(N[C@H](C(NCC(O)=O)=O)C)=O)NC(CNC([C@@H](NC(CNC([C@@H](NC([C@@H]1CCCN1C([C@@H](NC([C@@H]2CC(NCC(N[C@H](C(N[C@H](C(NCC(NCC(N[C@H](C(N[C@H](C(N2)=O)C(C)C)=O)[C@H](O)C)=O)=O)=O)CO)=O)CC(C)C)=O)=O)=O)C)=O)=O)C)=O)=O)CCC(N)=O)=O)=O)C
MCRN01	ORAL	Streptococcus dysgalactiae subsp. equisimilis	[u'RIBOSOMAL']	[u'CLASS_II_LANTIPEPTIDE', u'CLASS_II_BACTERIOCIN']	5	133_["lacticin 3147 A1"]	0.911111		MEIKKLETFHQMTIEKLAKVEGGKNHWQANVRGGIAAGSAGDAIGFPVCGVAC
MCRN01	ORAL	Streptococcus dysgalactiae subsp. equisimilis	[u'RIBOSOMAL']	[u'LINEAR_AZOLE_CONTAINING_PEPTIDE']	6	600_["PLANTAZOLICIN B"]	0.789474	O=C(O)C(N=C(O)C1N=C(OC1(C))c2nc(oc2)c3nc(oc3)c4nc(oc4)c5nc(oc5)C(N=C(O)C(N=C(O)c6nc(oc6C)c7nc(oc7C)c%10nc(c8nc(oc8C)c9nc(C(N)CCCNC(=N)N)sc9)sc%10)C(C)CC)C(C)CC)Cc%11ccccc%11
LNMB01	STOOL	Enterococcus faecium	[u'RIBOSOMAL']	[u'CLASS_II_BACTERIOCIN']	1	16_Bacteriocin T8	1		MKKKVLKHCVILGILGTCLAGIGTGIKVDAATYYGNGLYCNKEKCWVDWNQAKGEIGKIIVNGWVNHGPWAPRR
LNMB01	STOOL	Enterococcus faecium	[u'RIBOSOMAL']	[u'CLASS_II_BACTERIOCIN']	3	40_Enterocin A	0.978723		MKHLKILSIKETQLIYGGTTHSGKYYGNGVYCTKNKCTVDWAKATTCIAGMSIGGFLXGAIPGKC
AGKE01	ORAL	Streptococcus mutans TCI-146	[u'RIBOSOMAL']	[u'CLASS_II_BACTERIOCIN']	2	69_Antimicrobial protein BL-A60	0.545455		MNTKMMEQFETMDTETLSHVTGGGLYDGANGYAYRDSQGHWAYKVTKTPAQALTDVVVNSWASGAASFAAYA
AGLU01	ORAL	Streptococcus mutans TCI-228	[u'RIBOSOMAL']	[u'CLASS_II_BACTERIOCIN']	3	69_Antimicrobial protein BL-A60	0.545455		MLVDILTIKKGGIHMNTRMMEQFETMDAETLSHVTGGGLYDGANGYAYRDSQGHWAYKVTKTPAQALTDVVVNSWASGAASFAAYA
CEBA01	CSF	Streptococcus suis	[u'RIBOSOMAL']	[u'CLASS_II_LANTIPEPTIDE']	2	88_["A-3802-VI-7"]	0.678571	O=C(O)CCC4NC(=O)C(NC(=O)C6NC(=O)C(NC(=O)C(NC(=O)C1NC(=O)C(NC(=O)C(NC(=O)CNC(=O)C(NC(=O)C(NC(=O)C)CSC1)CO)Cc3c[nH]c2ccccc23)C(C)C)C(C)SCC(NC4(=O))C(=O)NCC(=O)NC5C(=O)NC(C(=O)NC(C(=O)NC(C(=O)NC(C(=O)NC(C(=O)OC)CS(=O)C5(C))C)CSC6(C))C(C)CC)C(C)C)CC(C)C)C(C)CC
JJMS01	ORAL	Streptococcus salivarius	[u'RIBOSOMAL']	[u'CLASS_I_LANTIPEPTIDE']	2	124_["STREPTIN"]	1	CC(CC1NC(C(NC(C(NC(C(NC(CNC(C(C(C)C)N)=O)=O)CSCC(C(NC(C(N2CCCC2C(NCC(NC(C(NC(C(NC(C(NC(C(NC(C(NC3C(C)C)=O)CC(C)C)=O)CCCCN)=O)CC4=CNc5c4cccc5)=O)CS6)=O)CSCC(C(NC(C(N/C(C(N/C(C(N/C(C(NC(C(NC(C(O)=O)CCCCN)=O)C(C)C)=O)=C/C)=O)=C/C)=O)=C/C)=O)Cc7ccccc7)=O)NC3=O)=O)=O)=O)C6C)=O)NC1=O)=O)CCCNC(N)=N)=O)Cc8ccc(O)cc8)=O)C
JJMS01	ORAL	Streptococcus salivarius	[u'RIBOSOMAL']	[u'CLASS_II_LANTIPEPTIDE']	4	129_["streptococcin A-M49"]	0.956522	CCC(C(C(NC(C(NC(C(NC(C(NC(C(NC(C(NC(C(NC(C(NC1C(NC(C(NC(C(NC(C(NC(C(NC(C(N/C2=C\C)=O)C)=O)CC(C)C)=O)Cc3ccccc3)=O)C)=O)CC4=CNc5c4cccc5)=O)=O)CC(N)=O)=O)CC(C)C)=O)Cc6nc[nH]c6)=O)CS7)=O)CCC(O)=O)=O)Cc8nc[nH]c8)=O)CSCC(C(NC(C(NC(C(O)=O)=C)=O)CSC1C)=O)NC2=O)=O)NC(C(C7C)NC(C(NC(C(NC(C(C(C)C)NC(CNC(C(NC(C(NC(CN)=O)CCCCN)=O)CC(N)=O)=O)=O)=O)Cc9ccccc9)=O)CCCCN)=O)=O)C
MBLB01	VAGINA	Streptococcus agalactiae	[u'RIBOSOMAL']	[u'CLASS_I_LANTIPEPTIDE']	3	148_["NISIN U"]	0.941176	CCC(C(C(N/C(C(NC(C(NC(C(NC(C(NC1CC(C)C)=O)=C)=O)CCCCN)=O)CSCC(C(NC(C(N2CCCC2C(NCC(NC(C(NC(C(NC(C(NCC(NC(C(NC(C(NC(C(N/C(C(NC(C(N3CCCC3C(NC(C(NC(C(NC(C(NC(C(NC(C(NC(C(NCC(NC(C(NC(C(NC(C(NCC(O)=O)=O)Cc4ccccc4)=O)Cc5nc[nH]c5)=O)CS6)=O)=O)CS7)=O)C6C)=O)C)=O)C7C)=O)CCCCN)=O)CC(C)C)=O)=O)CS8)=O)=C\C)=O)CCSC)=O)CC(C)C)=O)C(CC)C)=O)=O)C8C)=O)CCCCN)=O)CS9)=O)=O)=O)C9C)=O)NC1=O)=O)=C\C)=O)N)C
LRGH01	SKIN	Streptococcus pyogenes	[u'RIBOSOMAL']	[u'LINEAR_AZOLE_CONTAINING_PEPTIDE']	1	600_["PLANTAZOLICIN B"]	0.789474	O=C(O)C(N=C(O)C1N=C(OC1(C))c2nc(oc2)c3nc(oc3)c4nc(oc4)c5nc(oc5)C(N=C(O)C(N=C(O)c6nc(oc6C)c7nc(oc7C)c%10nc(c8nc(oc8C)c9nc(C(N)CCCNC(=N)N)sc9)sc%10)C(C)CC)C(C)CC)Cc%11ccccc%11
LRGH01	SKIN	Streptococcus pyogenes	[u'RIBOSOMAL']	[u'CLASS_I_LANTIPEPTIDE']	3	124_["STREPTIN"]	1	CC(CC1NC(C(NC(C(NC(C(NC(CNC(C(C(C)C)N)=O)=O)CSCC(C(NC(C(N2CCCC2C(NCC(NC(C(NC(C(NC(C(NC(C(NC(C(NC3C(C)C)=O)CC(C)C)=O)CCCCN)=O)CC4=CNc5c4cccc5)=O)CS6)=O)CSCC(C(NC(C(N/C(C(N/C(C(N/C(C(NC(C(NC(C(O)=O)CCCCN)=O)C(C)C)=O)=C/C)=O)=C/C)=O)=C/C)=O)Cc7ccccc7)=O)NC3=O)=O)=O)=O)C6C)=O)NC1=O)=O)CCCNC(N)=N)=O)Cc8ccc(O)cc8)=O)C
LRGH01	SKIN	Streptococcus pyogenes	[u'RIBOSOMAL']	[u'CLASS_II_LANTIPEPTIDE']	4	121_["SALIVARICIN A"]	0.9375	CCC(C(C(NC(C(NC(C(NC(C(NC(C(NC(C(NC(C(NC(C(N1CCCC1C(NC(C(NC(C(NC(C(NC(C(NC(C(NC2CS3)=O)C(C)C)=O)Cc4ccccc4)=O)C(C)C)=O)CSCC(C(O)=O)NC2=O)=O)CC(N)=O)=O)=O)CS5)=O)CC(O)=O)=O)CC(O)=O)=O)C3C)=O)C(CC)C)=O)C5C)=O)C)=O)NC(C(NC(CNC(C(NC(CNC(C(NC(C(CCCCN)N)=O)CCCNC(N)=N)=O)=O)CO)=O)=O)CC6=CNc7c6cccc7)=O)C
LAGK01	STOOL	Clostridium botulinum	[u'RIBOSOMAL']	[u'LINEAR_AZOLE_CONTAINING_PEPTIDE']	3	603_clostridiolysin_S	0.9	NC(CS)C1=NC(C2=NC(C3=NC(C4=NC(C5=NC(C6=NC(C7=NC(C8=NC(C(NC(C9=NC(C(NC(C%10=NC(C(NC(C(NCC(NCC(NCC%11=NC(C(NC(C)C%12=NC(C%13=NC(C(NCC(NCC(NCC(NC(C)C(NC(C)C(NC(C)C(NCC(NC(C(NCC(NCC(NC(C(O)=O)CC(N)=O)=O)=O)=O)CCC(N)=O)=O)=O)=O)=O)=O)=O)=O)=O)=C(C)O%13)=CO%12)=O)=CO%11)=O)=O)=O)C(C)C)=O)=CO%10)C(C)C)=O)=CO9)C(C)C)=O)=CS8)=CS7)=CS6)=CS5)=CO4)=CS3)=CS2)=CS1
LRGG01	SKIN	Streptococcus pyogenes	[u'RIBOSOMAL']	[u'CLASS_I_LANTIPEPTIDE']	2	124_["STREPTIN"]	1	CC(CC1NC(C(NC(C(NC(C(NC(CNC(C(C(C)C)N)=O)=O)CSCC(C(NC(C(N2CCCC2C(NCC(NC(C(NC(C(NC(C(NC(C(NC(C(NC3C(C)C)=O)CC(C)C)=O)CCCCN)=O)CC4=CNc5c4cccc5)=O)CS6)=O)CSCC(C(NC(C(N/C(C(N/C(C(N/C(C(NC(C(NC(C(O)=O)CCCCN)=O)C(C)C)=O)=C/C)=O)=C/C)=O)=C/C)=O)Cc7ccccc7)=O)NC3=O)=O)=O)=O)C6C)=O)NC1=O)=O)CCCNC(N)=N)=O)Cc8ccc(O)cc8)=O)C
LRGG01	SKIN	Streptococcus pyogenes	[u'RIBOSOMAL']	[u'CLASS_II_LANTIPEPTIDE']	3	121_["SALIVARICIN A"]	0.9375	CCC(C(C(NC(C(NC(C(NC(C(NC(C(NC(C(NC(C(NC(C(N1CCCC1C(NC(C(NC(C(NC(C(NC(C(NC(C(NC2CS3)=O)C(C)C)=O)Cc4ccccc4)=O)C(C)C)=O)CSCC(C(O)=O)NC2=O)=O)CC(N)=O)=O)=O)CS5)=O)CC(O)=O)=O)CC(O)=O)=O)C3C)=O)C(CC)C)=O)C5C)=O)C)=O)NC(C(NC(CNC(C(NC(CNC(C(NC(C(CCCCN)N)=O)CCCNC(N)=N)=O)=O)CO)=O)=O)CC6=CNc7c6cccc7)=O)C
LRGG01	SKIN	Streptococcus pyogenes	[u'RIBOSOMAL']	[u'LINEAR_AZOLE_CONTAINING_PEPTIDE']	4	600_["PLANTAZOLICIN B"]	0.789474	O=C(O)C(N=C(O)C1N=C(OC1(C))c2nc(oc2)c3nc(oc3)c4nc(oc4)c5nc(oc5)C(N=C(O)C(N=C(O)c6nc(oc6C)c7nc(oc7C)c%10nc(c8nc(oc8C)c9nc(C(N)CCCNC(=N)N)sc9)sc%10)C(C)CC)C(C)CC)Cc%11ccccc%11
AGKZ01	ORAL	Streptococcus mutans TCI-169	[u'RIBOSOMAL']	[u'CLASS_II_BACTERIOCIN']	2	69_Antimicrobial protein BL-A60	0.545455		MNTRMMEQFETMDAETLSHVTGGGLYDGANGYAYRDSQGHWAYKVTKTPAQALTDVVVNSWASGAASFAAYA
MCRP01	ORAL	Streptococcus dysgalactiae subsp. equisimilis	[u'RIBOSOMAL']	[u'LINEAR_AZOLE_CONTAINING_PEPTIDE']	3	600_["PLANTAZOLICIN B"]	0.789474	O=C(O)C(N=C(O)C1N=C(OC1(C))c2nc(oc2)c3nc(oc3)c4nc(oc4)c5nc(oc5)C(N=C(O)C(N=C(O)c6nc(oc6C)c7nc(oc7C)c%10nc(c8nc(oc8C)c9nc(C(N)CCCNC(=N)N)sc9)sc%10)C(C)CC)C(C)CC)Cc%11ccccc%11
MCRP01	ORAL	Streptococcus dysgalactiae subsp. equisimilis	[u'RIBOSOMAL']	[u'CLASS_I_LANTIPEPTIDE']	6	161_["Avermipeptin"]	0.594595	NCC(NCC(NCC(N[C@@H](C)C(N[C@H](C(N/C(C(N[C@H]1C(C)C)=O)=C\C)=O)C[C@](CSC[C@@H](C(N[C@H](C(N[C@H](C(N[C@@H](C)C(N[C@H]2C)=O)=O)C[C@](CSC[C@@H](C(N[C@H](C(O)=O)CC(C)C)=O)NC3=O)(C(N[C@H](C(N[C@H](C(N[C@H]3CC(C)C)=O)CC(C)C)=O)C(C)C)=O)NC2=O)=O)C(C)C)=O)NC4=O)(C(N[C@H](C(N[C@H](C(NC4=C)=O)CC(C)C)=O)CC(C)C)=O)NC1=O)=O)=O)=O)=O
LNMI01	STOOL	Enterococcus faecium	[u'RIBOSOMAL']	[u'CLASS_II_BACTERIOCIN']	1	16_Bacteriocin T8	1		MKKKVLKHCVILGILGTCLAGIGTGIKVDAATYYGNGLYCNKEKCWVDWNQAKGEIGKIIVNGWVNHGPWAPRR
LNMI01	STOOL	Enterococcus faecium	[u'RIBOSOMAL']	[u'CLASS_II_BACTERIOCIN']	3	40_Enterocin A	1		MKHLKILSIKETQLIYGGTTHSGKYYGNGVYCTKNKCTVDWAKATTCIAGMSIGGFLGGAIPGKC
LOGR01	STOOL	Escherichia coli	[u'RIBOSOMAL']	[u'LINEAR_AZOLE_CONTAINING_PEPTIDE']	4	601_["MccB17","MICROCIN B17","MICROCIN 17W"]	1	O=C(O)C(N=C(O)C(N=C(O)C(N=C(O)CN=C(O)c1nc(oc1)CN=C(O)CN=C(O)c2nc(oc2)CN=C(O)CN=C(O)C(N=C(O)CN=C(O)CN=C(O)c3nc(oc3)c8nc(CN=C(O)C(N=C(O)C(N=C(O)c7nc(CN=C(O)CN=C(O)c6nc(CN=C(O)CN=C(O)CN=C(O)C(N=C(O)CN=C(O)CN=C(O)c5nc(c4nc(oc4)CN=C(O)CN=C(O)CN=C(O)CN=C(O)CN=C(O)CN=C(O)CN=C(O)CN=C(O)CN=C(O)CN=C(O)C(N=C(O)CN=C(O)C(N)C(C)C)C(C)CC)sc5)CCC(=N)O)sc6)sc7)CO)CC(=N)O)sc8)CC(=N)O)CO)Cc9cnc[nH]9)C(C)CC
AHRL01	ORAL	Streptococcus mutans 4SM1	[u'RIBOSOMAL']	[u'CLASS_II_BACTERIOCIN']	2	69_Antimicrobial protein BL-A60	0.545455		MLVDILTIKKGGIHMNTKMMEQFETMDAETLSHVTGGGLYDGANGYAYRDSQGHWAYKVTKTPAQALTDVVVNSWASGAASFAAYA
AHRL01	ORAL	Streptococcus mutans 4SM1	[u'RIBOSOMAL']	[u'CLASS_II_LANTIPEPTIDE']	8	127_["VARIACIN"]	0.688889	CCC(C(C(NC(C(NC(C(NC(C(NC(C(NC(C(NC(C(NC(C(NC(C(NC(C(NC(C(NC(C(NC(C(NC(C(N/C1=C/C)=O)Cc2ccccc2)=O)C(C)C)=O)Cc3ccccc3)=O)CCC(N)=O)=O)Cc4ccccc4)=O)CSCC(C(NC(C(O)=O)=C)=O)NC5=O)=O)CC(N)=O)=O)CCSC)=O)Cc6nc[nH]c6)=O)CS7)=O)CCC(O)=O)=O)Cc8nc[nH]c8)=O)CSCC5NC1=O)=O)NC(C(C7C)NC(C9CCCN9C(C(C(CC)C)NC(C(C(C)C)NC(CNC(C(NC(CN)=O)=C)=O)=O)=O)=O)=O)=O)C
LNLY01	STOOL	Enterococcus faecium	[u'RIBOSOMAL']	[u'CLASS_II_BACTERIOCIN']	1	16_Bacteriocin T8	1		MKKKVLKHCVILGILGTCLAGIGTGIKVDAATYYGNGLYCNKEKCWVDWNQAKGEIGKIIVNGWVNHGPWAPRR
LNLY01	STOOL	Enterococcus faecium	[u'RIBOSOMAL']	[u'CLASS_II_BACTERIOCIN']	2	40_Enterocin A	1		MKHLKILSIKETQLIYGGTTHSGKYYGNGVYCTKNKCTVDWAKATTCIAGMSIGGFLGGAIPGKC
JGJX01	SKIN	Staphylococcus aureus M24418	[u'RIBOSOMAL']	[u'CLASS_I_LANTIPEPTIDE']	4	105_["Lanthionine containing peptide","HYICIN M51"]	0.952381	O=C(N)CC5NC(=O)C(NC(=O)C(NC(=O)CNC(=O)C(=CC)NC(=O)C(NC(=O)C(NC(=O)C3NC(=O)CNC(=O)C4N(C(=O)C(NC(=O)C1NC(=O)C(NC(=O)C(=C)NC(=O)C(NC(=O)C(NC(=O)C(=CC)NC(=O)C(N)C(C)CC)CSC1)Cc2ccccc2)CC(C)C)C(C)SC3)CCC4)C)CCCCN)CSCC6NC(=O)C(NC(=O)C(NC5(=O))CSC=CNC6(=O))Cc7ccc(O)cc7)Cc8ccccc8
LTMA01	SKIN	Staphylococcus sp. HMSC66C11	[u'RIBOSOMAL']	[u'CLASS_I_LANTIPEPTIDE']	4	105_["Lanthionine containing peptide","HYICIN M51"]	0.952381	O=C(N)CC5NC(=O)C(NC(=O)C(NC(=O)CNC(=O)C(=CC)NC(=O)C(NC(=O)C(NC(=O)C3NC(=O)CNC(=O)C4N(C(=O)C(NC(=O)C1NC(=O)C(NC(=O)C(=C)NC(=O)C(NC(=O)C(NC(=O)C(=CC)NC(=O)C(N)C(C)CC)CSC1)Cc2ccccc2)CC(C)C)C(C)SC3)CCC4)C)CCCCN)CSCC6NC(=O)C(NC(=O)C(NC5(=O))CSC=CNC6(=O))Cc7ccc(O)cc7)Cc8ccccc8
AHSZ01	ORAL	Streptococcus mutans 21	[u'RIBOSOMAL']	[u'CLASS_II_BACTERIOCIN']	1	69_Antimicrobial protein BL-A60	0.545455		MLVDILTIKKGGIHMNTRMMEQFETMDAETLSHVTGGGLYDGANGYAYRDSQGHWAYKVTKTPAQALTDVVVNSWASGAASFAAYA
JNRH01	STOOL	Escherichia coli 2-474-04_S3_C1	[u'RIBOSOMAL']	[u'LINEAR_AZOLE_CONTAINING_PEPTIDE']	6	601_["MccB17","MICROCIN B17","MICROCIN 17W"]	0.924528	O=C(O)C(N=C(O)C(N=C(O)C(N=C(O)CN=C(O)c1nc(oc1)CN=C(O)CN=C(O)c2nc(oc2)CN=C(O)CN=C(O)C(N=C(O)CN=C(O)CN=C(O)c3nc(oc3)c8nc(CN=C(O)C(N=C(O)C(N=C(O)c7nc(CN=C(O)CN=C(O)c6nc(CN=C(O)CN=C(O)CN=C(O)C(N=C(O)CN=C(O)CN=C(O)c5nc(c4nc(oc4)CN=C(O)CN=C(O)CN=C(O)CN=C(O)CN=C(O)CN=C(O)CN=C(O)CN=C(O)CN=C(O)CN=C(O)C(N=C(O)CN=C(O)C(N)C(C)C)C(C)CC)sc5)CCC(=N)O)sc6)sc7)CO)CC(=N)O)sc8)CC(=N)O)CO)Cc9cnc[nH]9)C(C)CC
AGKM01	ORAL	Streptococcus mutans TCI-125	[u'RIBOSOMAL']	[u'CLASS_II_BACTERIOCIN']	3	69_Antimicrobial protein BL-A60	0.545455		MLVDILTIKKGGIHMNTRMMEQFETMDAETLSHVTGGGLYDGANGYAYRDSQGHWAYKVTKTPAQALTDVVVNSWASGAASFAAYA
AHRH01	ORAL	Streptococcus mutans M230	[u'RIBOSOMAL']	[u'CLASS_II_LANTIPEPTIDE']	3	127_["VARIACIN"]	0.688889	CCC(C(C(NC(C(NC(C(NC(C(NC(C(NC(C(NC(C(NC(C(NC(C(NC(C(NC(C(NC(C(NC(C(NC(C(N/C1=C/C)=O)Cc2ccccc2)=O)C(C)C)=O)Cc3ccccc3)=O)CCC(N)=O)=O)Cc4ccccc4)=O)CSCC(C(NC(C(O)=O)=C)=O)NC5=O)=O)CC(N)=O)=O)CCSC)=O)Cc6nc[nH]c6)=O)CS7)=O)CCC(O)=O)=O)Cc8nc[nH]c8)=O)CSCC5NC1=O)=O)NC(C(C7C)NC(C9CCCN9C(C(C(CC)C)NC(C(C(C)C)NC(CNC(C(NC(CN)=O)=C)=O)=O)=O)=O)=O)=O)C
CECC01	CSF	Streptococcus suis	[u'RIBOSOMAL']	[u'CLASS_II_LANTIPEPTIDE']	2	88_["A-3802-VI-7"]	0.678571	O=C(O)CCC4NC(=O)C(NC(=O)C6NC(=O)C(NC(=O)C(NC(=O)C1NC(=O)C(NC(=O)C(NC(=O)CNC(=O)C(NC(=O)C(NC(=O)C)CSC1)CO)Cc3c[nH]c2ccccc23)C(C)C)C(C)SCC(NC4(=O))C(=O)NCC(=O)NC5C(=O)NC(C(=O)NC(C(=O)NC(C(=O)NC(C(=O)NC(C(=O)OC)CS(=O)C5(C))C)CSC6(C))C(C)CC)C(C)C)CC(C)C)C(C)CC
AHSB01	ORAL	Streptococcus mutans U138	[u'RIBOSOMAL']	[u'CLASS_II_LANTIPEPTIDE']	1	193_Smb B	1	N[C@@H]([C@H](CC)C)C(NCC(N/C(C(N/C(C(N[C@H](C(N[C@H](C(N[C@H](C(NC(C(N/C(C(N[C@@H](CC1=CC=CC=C1)C(N[C@H](C(N[C@@H]([C@H](CC)C)C(N[C@H](C(N[C@H](C(NCC(N[C@H](C(N[C@H](C(NCC(N[C@@H](CC2=CC=C(C=C2)O)C(N[C@H]3[C@H](CC)C)=O)=O)=O)CCCCN)=O)CC(N)=O)=O)=O)CC(C)C)=O)C(C)C)=O)=O)CSC[C@@H](C(N[C@H](C(N[C@H](C(N[C@H](C(N[C@H](C(N[C@H](C(N[C@@H](CS4)C(N[C@@H](CCSC)C(N[C@H](C(N[C@H](C(N[C@@H](CS5)C(NC(C(N[C@H]…
AHSB01	ORAL	Streptococcus mutans U138	[u'RIBOSOMAL']	[u'CLASS_II_LANTIPEPTIDE']	2	127_["VARIACIN"]	0.688889	CCC(C(C(NC(C(NC(C(NC(C(NC(C(NC(C(NC(C(NC(C(NC(C(NC(C(NC(C(NC(C(NC(C(NC(C(N/C1=C/C)=O)Cc2ccccc2)=O)C(C)C)=O)Cc3ccccc3)=O)CCC(N)=O)=O)Cc4ccccc4)=O)CSCC(C(NC(C(O)=O)=C)=O)NC5=O)=O)CC(N)=O)=O)CCSC)=O)Cc6nc[nH]c6)=O)CS7)=O)CCC(O)=O)=O)Cc8nc[nH]c8)=O)CSCC5NC1=O)=O)NC(C(C7C)NC(C9CCCN9C(C(C(CC)C)NC(C(C(C)C)NC(CNC(C(NC(CN)=O)=C)=O)=O)=O)=O)=O)=O)C
AHSB01	ORAL	Streptococcus mutans U138	[u'RIBOSOMAL']	[u'CLASS_II_BACTERIOCIN']	6	69_Antimicrobial protein BL-A60	0.545455		MNTRMMEQFETMDAETLSHVTGGGLYDGSNGYAYRDSQGHWAYKVTKTPAQALTDVVVNSWASGAASFAAYA
LFUY01	SKIN	Staphylococcus aureus subsp. aureus	[u'RIBOSOMAL']	[u'CLASS_I_LANTIPEPTIDE']	4	105_["Lanthionine containing peptide","HYICIN M51"]	0.952381	O=C(N)CC5NC(=O)C(NC(=O)C(NC(=O)CNC(=O)C(=CC)NC(=O)C(NC(=O)C(NC(=O)C3NC(=O)CNC(=O)C4N(C(=O)C(NC(=O)C1NC(=O)C(NC(=O)C(=C)NC(=O)C(NC(=O)C(NC(=O)C(=CC)NC(=O)C(N)C(C)CC)CSC1)Cc2ccccc2)CC(C)C)C(C)SC3)CCC4)C)CCCCN)CSCC6NC(=O)C(NC(=O)C(NC5(=O))CSC=CNC6(=O))Cc7ccc(O)cc7)Cc8ccccc8
LNMV01	STOOL	Enterococcus faecium	[u'RIBOSOMAL']	[u'CLASS_II_BACTERIOCIN']	2	40_Enterocin A	1		MKHLKILSIKETQLIYGGTTHSGKYYGNGVYCTKNKCTVDWAKATTCIAGMSIGGFLGGAIPGKC
LNLL01	STOOL	Enterococcus faecium	[u'RIBOSOMAL']	[u'CLASS_II_BACTERIOCIN']	1	16_Bacteriocin T8	1		MKKKVLKHCVILGILGTCLAGIGTGIKVDAATYYGNGLYCNKEKCWVDWNQAKGEIGKIIVNGWVNHGPWAPRR
LNLL01	STOOL	Enterococcus faecium	[u'RIBOSOMAL']	[u'CLASS_II_BACTERIOCIN']	3	40_Enterocin A	1		MKHLKILSIKETQLIYGGTTHSGKYYGNGVYCTKNKCTVDWAKATTCIAGMSIGGFLGGAIPGKC
LUWH01	ORAL	Lactobacillus plantarum	[u'RIBOSOMAL']	[u'CLASS_II_BACTERIOCIN']	1	55_Plantaricin J	1		MKIKLTVLNEFEELTADAEKNISGGRRSRKNGIGYAIGYAFGAVERAVLGGSRDYNK
LUWH01	ORAL	Lactobacillus plantarum	[u'RIBOSOMAL']	[u'CLASS_II_BACTERIOCIN']	3	54_Plantaricin F	1		MLQFEKLQYSRLPQKKLAKISGGFNRGGYNFGKSVRHVVDAIGSVAGIRGILKSIR
LTMK01	SKIN	Staphylococcus sp. HMSC57A07	[u'RIBOSOMAL']	[u'CLASS_I_LANTIPEPTIDE']	3	105_["Lanthionine containing peptide","HYICIN M51"]	0.952381	O=C(N)CC5NC(=O)C(NC(=O)C(NC(=O)CNC(=O)C(=CC)NC(=O)C(NC(=O)C(NC(=O)C3NC(=O)CNC(=O)C4N(C(=O)C(NC(=O)C1NC(=O)C(NC(=O)C(=C)NC(=O)C(NC(=O)C(NC(=O)C(=CC)NC(=O)C(N)C(C)CC)CSC1)Cc2ccccc2)CC(C)C)C(C)SC3)CCC4)C)CCCCN)CSCC6NC(=O)C(NC(=O)C(NC5(=O))CSC=CNC6(=O))Cc7ccc(O)cc7)Cc8ccccc8
AGMC01	ORAL	Streptococcus mutans TCI-260	[u'RIBOSOMAL']	[u'CLASS_II_BACTERIOCIN']	2	69_Antimicrobial protein BL-A60	0.545455		MNTRMMEQFETMDAETLSHVTGGGLYDGANGYAYRDSQGHWAYKVTKTPAQALTDVVVNSWASGAASFAAYA
AGKS01	ORAL	Streptococcus mutans TCI-151	[u'RIBOSOMAL']	[u'CLASS_II_BACTERIOCIN']	2	69_Antimicrobial protein BL-A60	0.545455		MNTKMMEQFETMDAETLSHVTGGGLYDGANGYAYRDSQGHWAYKVTKTPAQALTDVVVNSWASGAASFAAYA
JXZA01	URINE	Enterococcus faecium	[u'RIBOSOMAL']	[u'CLASS_II_BACTERIOCIN']	2	40_Enterocin A	1		MHIKNTKTTFILSSEELKNIQGGSAVGVLGTTFSGATAGVKLCSAGGPYAIAACGVGGALLGAGFSMWTGA
JXZA01	URINE	Enterococcus faecium	[u'RIBOSOMAL']	[u'CLASS_II_BACTERIOCIN']	3	16_Bacteriocin T8	1		MKKKVLKHCVILGILGTCLAGIGTGIKVDAATYYGNGLYCNKEKCWVDWNQAKGEIGKIIVNGWVNHGPWAPRR
LRGO01	SKIN	Streptococcus pyogenes	[u'RIBOSOMAL']	[u'LINEAR_AZOLE_CONTAINING_PEPTIDE']	2	600_["PLANTAZOLICIN B"]	0.789474	O=C(O)C(N=C(O)C1N=C(OC1(C))c2nc(oc2)c3nc(oc3)c4nc(oc4)c5nc(oc5)C(N=C(O)C(N=C(O)c6nc(oc6C)c7nc(oc7C)c%10nc(c8nc(oc8C)c9nc(C(N)CCCNC(=N)N)sc9)sc%10)C(C)CC)C(C)CC)Cc%11ccccc%11
LRGO01	SKIN	Streptococcus pyogenes	[u'RIBOSOMAL']	[u'CLASS_II_LANTIPEPTIDE']	4	121_["SALIVARICIN A"]	0.9375	CCC(C(C(NC(C(NC(C(NC(C(NC(C(NC(C(NC(C(NC(C(N1CCCC1C(NC(C(NC(C(NC(C(NC(C(NC(C(NC2CS3)=O)C(C)C)=O)Cc4ccccc4)=O)C(C)C)=O)CSCC(C(O)=O)NC2=O)=O)CC(N)=O)=O)=O)CS5)=O)CC(O)=O)=O)CC(O)=O)=O)C3C)=O)C(CC)C)=O)C5C)=O)C)=O)NC(C(NC(CNC(C(NC(CNC(C(NC(C(CCCCN)N)=O)CCCNC(N)=N)=O)=O)CO)=O)=O)CC6=CNc7c6cccc7)=O)C
JGPX01	RESPIRATORY	Staphylococcus aureus DAR3861	[u'RIBOSOMAL']	[u'BACTERIAL_HEAD_TO_TAIL_CYCLIZED']	3	595_Syanodin I	0.590909	CC(C[C@@H](C(N[C@H](C(NCC(O)=O)=O)C)=O)NC(CNC([C@@H](NC(CNC([C@@H](NC([C@@H]1CCCN1C([C@@H](NC([C@@H]2CC(NCC(N[C@H](C(N[C@H](C(NCC(NCC(N[C@H](C(N[C@H](C(N2)=O)C(C)C)=O)[C@H](O)C)=O)=O)=O)CO)=O)CC(C)C)=O)=O)=O)C)=O)=O)C)=O)=O)CCC(N)=O)=O)=O)C
JGSH01	RESPIRATORY	Staphylococcus aureus DAR1810	[u'RIBOSOMAL']	[u'BACTERIAL_HEAD_TO_TAIL_CYCLIZED']	3	595_Syanodin I	0.590909	CC(C[C@@H](C(N[C@H](C(NCC(O)=O)=O)C)=O)NC(CNC([C@@H](NC(CNC([C@@H](NC([C@@H]1CCCN1C([C@@H](NC([C@@H]2CC(NCC(N[C@H](C(N[C@H](C(NCC(NCC(N[C@H](C(N[C@H](C(N2)=O)C(C)C)=O)[C@H](O)C)=O)=O)=O)CO)=O)CC(C)C)=O)=O)=O)C)=O)=O)C)=O)=O)CCC(N)=O)=O)=O)C
LRGI01	SKIN	Streptococcus pyogenes	[u'RIBOSOMAL']	[u'LINEAR_AZOLE_CONTAINING_PEPTIDE']	1	600_["PLANTAZOLICIN B"]	0.789474	O=C(O)C(N=C(O)C1N=C(OC1(C))c2nc(oc2)c3nc(oc3)c4nc(oc4)c5nc(oc5)C(N=C(O)C(N=C(O)c6nc(oc6C)c7nc(oc7C)c%10nc(c8nc(oc8C)c9nc(C(N)CCCNC(=N)N)sc9)sc%10)C(C)CC)C(C)CC)Cc%11ccccc%11
LRGI01	SKIN	Streptococcus pyogenes	[u'RIBOSOMAL']	[u'CLASS_I_LANTIPEPTIDE']	3	124_["STREPTIN"]	1	CC(CC1NC(C(NC(C(NC(C(NC(CNC(C(C(C)C)N)=O)=O)CSCC(C(NC(C(N2CCCC2C(NCC(NC(C(NC(C(NC(C(NC(C(NC(C(NC3C(C)C)=O)CC(C)C)=O)CCCCN)=O)CC4=CNc5c4cccc5)=O)CS6)=O)CSCC(C(NC(C(N/C(C(N/C(C(N/C(C(NC(C(NC(C(O)=O)CCCCN)=O)C(C)C)=O)=C/C)=O)=C/C)=O)=C/C)=O)Cc7ccccc7)=O)NC3=O)=O)=O)=O)C6C)=O)NC1=O)=O)CCCNC(N)=N)=O)Cc8ccc(O)cc8)=O)C
LRGI01	SKIN	Streptococcus pyogenes	[u'RIBOSOMAL']	[u'CLASS_II_LANTIPEPTIDE']	5	121_["SALIVARICIN A"]	0.9375	CCC(C(C(NC(C(NC(C(NC(C(NC(C(NC(C(NC(C(NC(C(N1CCCC1C(NC(C(NC(C(NC(C(NC(C(NC(C(NC2CS3)=O)C(C)C)=O)Cc4ccccc4)=O)C(C)C)=O)CSCC(C(O)=O)NC2=O)=O)CC(N)=O)=O)=O)CS5)=O)CC(O)=O)=O)CC(O)=O)=O)C3C)=O)C(CC)C)=O)C5C)=O)C)=O)NC(C(NC(CNC(C(NC(CNC(C(NC(C(CCCCN)N)=O)CCCNC(N)=N)=O)=O)CO)=O)=O)CC6=CNc7c6cccc7)=O)C
JMGU01	STOOL	Escherichia coli 2-011-08_S3_C2	[u'RIBOSOMAL']	[u'LINEAR_AZOLE_CONTAINING_PEPTIDE']	4	601_["MccB17","MICROCIN B17","MICROCIN 17W"]	0.924528	O=C(O)C(N=C(O)C(N=C(O)C(N=C(O)CN=C(O)c1nc(oc1)CN=C(O)CN=C(O)c2nc(oc2)CN=C(O)CN=C(O)C(N=C(O)CN=C(O)CN=C(O)c3nc(oc3)c8nc(CN=C(O)C(N=C(O)C(N=C(O)c7nc(CN=C(O)CN=C(O)c6nc(CN=C(O)CN=C(O)CN=C(O)C(N=C(O)CN=C(O)CN=C(O)c5nc(c4nc(oc4)CN=C(O)CN=C(O)CN=C(O)CN=C(O)CN=C(O)CN=C(O)CN=C(O)CN=C(O)CN=C(O)CN=C(O)C(N=C(O)CN=C(O)C(N)C(C)C)C(C)CC)sc5)CCC(=N)O)sc6)sc7)CO)CC(=N)O)sc8)CC(=N)O)CO)Cc9cnc[nH]9)C(C)CC
JGSO01	RESPIRATORY	Staphylococcus aureus DAR1862	[u'RIBOSOMAL']	[u'BACTERIAL_HEAD_TO_TAIL_CYCLIZED']	3	595_Syanodin I	0.590909	CC(C[C@@H](C(N[C@H](C(NCC(O)=O)=O)C)=O)NC(CNC([C@@H](NC(CNC([C@@H](NC([C@@H]1CCCN1C([C@@H](NC([C@@H]2CC(NCC(N[C@H](C(N[C@H](C(NCC(NCC(N[C@H](C(N[C@H](C(N2)=O)C(C)C)=O)[C@H](O)C)=O)=O)=O)CO)=O)CC(C)C)=O)=O)=O)C)=O)=O)C)=O)=O)CCC(N)=O)=O)=O)C
JGRZ01	RESPIRATORY	Staphylococcus aureus DAR1369	[u'RIBOSOMAL']	[u'BACTERIAL_HEAD_TO_TAIL_CYCLIZED']	2	569_["XANTHOMONIN II"]	0.578947	CC(C)C[C@@H](C(N[C@@H](C)C(NCC(N[C@H](C(N[C@H](C(N[C@@H](CCSC)C(NCC(NCC(N[C@@H]([C@H](CC)C)C(N[C@H](C(N[C@H](C(O)=O)[C@@H](C)O)=O)[C@@H](C)O)=O)=O)=O)=O)=O)CCC(O)=O)=O)CC1)=O)=O)=O)NC([C@@H]2CCCN2C(CNC(CNC1=O)=O)=O)=O
LNLZ01	STOOL	Enterococcus faecium	[u'RIBOSOMAL']	[u'CLASS_II_BACTERIOCIN']	1	16_Bacteriocin T8	1		MKKKVLKHCVILGILGTCLAGIGTGIKVDAATYYGNGLYCNKEKCWVDWNQAKGEIGKIIVNGWVNHGPWAPRR
LNLZ01	STOOL	Enterococcus faecium	[u'RIBOSOMAL']	[u'CLASS_II_BACTERIOCIN']	3	40_Enterocin A	1		MKHLKILSIKETQLIYGGTTHSGKYYGNGVYCTKNKCTVDWAKATTCIAGMSIGGFLGGAIPGKC
LWPM01	RESPIRATORY	Lactobacillus sp. HMSC25A02	[u'RIBOSOMAL']	[u'CLASS_II_BACTERIOCIN']	4	539_["MICROVIRIDIN E"]	0.555556		MELLNEKELAHVIGGKRKCPKTPFDNTPGAWFAHLILGC
AJQX01	STOOL	Enterococcus sp. GMD1E	[u'RIBOSOMAL']	[u'CLASS_II_BACTERIOCIN']	2	40_Enterocin A	1		MKHLKILSIKETQLIYGGTTHSGKYYGNGVYCTKNKCTVDWAKATTCIAGMSIGGFLGGAIPGKC
AJQX01	STOOL	Enterococcus sp. GMD1E	[u'RIBOSOMAL']	[u'CLASS_II_BACTERIOCIN']	3	17_Enterocin B	1		MQNVKELSTKEMKQIIGGENDHRMPNELNRPNNLSKGGAKCGAAIAGGLFGIPKGPLAWAAGLANVYSKCN
CDVV01	CSF	Streptococcus suis	[u'RIBOSOMAL']	[u'CLASS_II_LANTIPEPTIDE']	1	88_["A-3802-VI-7"]	0.678571	O=C(O)CCC4NC(=O)C(NC(=O)C6NC(=O)C(NC(=O)C(NC(=O)C1NC(=O)C(NC(=O)C(NC(=O)CNC(=O)C(NC(=O)C(NC(=O)C)CSC1)CO)Cc3c[nH]c2ccccc23)C(C)C)C(C)SCC(NC4(=O))C(=O)NCC(=O)NC5C(=O)NC(C(=O)NC(C(=O)NC(C(=O)NC(C(=O)NC(C(=O)OC)CS(=O)C5(C))C)CSC6(C))C(C)CC)C(C)C)CC(C)C)C(C)CC
JGRL01	RESPIRATORY	Staphylococcus aureus DAR1161	[u'RIBOSOMAL']	[u'BACTERIAL_HEAD_TO_TAIL_CYCLIZED']	2	569_["XANTHOMONIN II"]	0.578947	CC(C)C[C@@H](C(N[C@@H](C)C(NCC(N[C@H](C(N[C@H](C(N[C@@H](CCSC)C(NCC(NCC(N[C@@H]([C@H](CC)C)C(N[C@H](C(N[C@H](C(O)=O)[C@@H](C)O)=O)[C@@H](C)O)=O)=O)=O)=O)=O)CCC(O)=O)=O)CC1)=O)=O)=O)NC([C@@H]2CCCN2C(CNC(CNC1=O)=O)=O)=O
JSOT01	URINE	Escherichia coli	[u'RIBOSOMAL']	[u'LINEAR_AZOLE_CONTAINING_PEPTIDE']	3	601_["MccB17","MICROCIN B17","MICROCIN 17W"]	1	O=C(O)C(N=C(O)C(N=C(O)C(N=C(O)CN=C(O)c1nc(oc1)CN=C(O)CN=C(O)c2nc(oc2)CN=C(O)CN=C(O)C(N=C(O)CN=C(O)CN=C(O)c3nc(oc3)c8nc(CN=C(O)C(N=C(O)C(N=C(O)c7nc(CN=C(O)CN=C(O)c6nc(CN=C(O)CN=C(O)CN=C(O)C(N=C(O)CN=C(O)CN=C(O)c5nc(c4nc(oc4)CN=C(O)CN=C(O)CN=C(O)CN=C(O)CN=C(O)CN=C(O)CN=C(O)CN=C(O)CN=C(O)CN=C(O)C(N=C(O)CN=C(O)C(N)C(C)C)C(C)CC)sc5)CCC(=N)O)sc6)sc7)CO)CC(=N)O)sc8)CC(=N)O)CO)Cc9cnc[nH]9)C(C)CC
JSJT01	URINE	Escherichia coli	[u'RIBOSOMAL']	[u'LINEAR_AZOLE_CONTAINING_PEPTIDE']	1	601_["MccB17","MICROCIN B17","MICROCIN 17W"]	1	O=C(O)C(N=C(O)C(N=C(O)C(N=C(O)CN=C(O)c1nc(oc1)CN=C(O)CN=C(O)c2nc(oc2)CN=C(O)CN=C(O)C(N=C(O)CN=C(O)CN=C(O)c3nc(oc3)c8nc(CN=C(O)C(N=C(O)C(N=C(O)c7nc(CN=C(O)CN=C(O)c6nc(CN=C(O)CN=C(O)CN=C(O)C(N=C(O)CN=C(O)CN=C(O)c5nc(c4nc(oc4)CN=C(O)CN=C(O)CN=C(O)CN=C(O)CN=C(O)CN=C(O)CN=C(O)CN=C(O)CN=C(O)CN=C(O)C(N=C(O)CN=C(O)C(N)C(C)C)C(C)CC)sc5)CCC(=N)O)sc6)sc7)CO)CC(=N)O)sc8)CC(=N)O)CO)Cc9cnc[nH]9)C(C)CC
LNLS01	STOOL	Enterococcus faecium	[u'RIBOSOMAL']	[u'CLASS_II_BACTERIOCIN']	1	40_Enterocin A	1		MKHLKILSIKETQLIYGGTTHSGKYYGNGVYCTKNKCTVDWAKATTCIAGMSIGGFLGGAIPGKC
LNLS01	STOOL	Enterococcus faecium	[u'RIBOSOMAL']	[u'CLASS_II_BACTERIOCIN']	3	16_Bacteriocin T8	1		MKKKVLKHCVILGILGTCLAGIGTGIKVDAATYYGNGLYCNKEKCWVDWNQAKGEIGKIIVNGWVNHGPWAPRR
LTCD01	STOOL	Lactobacillus plantarum	[u'RIBOSOMAL']	[u'CLASS_II_BACTERIOCIN']	3	54_Plantaricin F	1		MLQFDKLQYSRLPQKKLAKISGGFNRGGYNFGKSVRHVVDAIGSVAGIRGILKSIR
LTCD01	STOOL	Lactobacillus plantarum	[u'RIBOSOMAL']	[u'CLASS_I_LANTIPEPTIDE']	4	113_["MUTACIN 1140","MUTICIN 1140"]	0.904762	O=C(NC(C(=O)NC7C(=O)NC(C(=O)NC(C(=O)NC(=CC)C(=O)N6CCCC6(C(=O)NCC(=O)NC5C(=O)NC(C(=O)NC(C(=O)NC(C(=O)NCC(=O)NC2C(=O)NC(C(=O)NC(C(=O)NC1C(=O)NC(C(=O)NC(C(=O)NC=CSC1)CSC2)Cc3ccc(O)cc3)CC(=O)N)Cc4ccccc4)C(C)SC5)CCCNC(=N)N)C))CSC7)CC(C)C)Cc9c[nH]c8ccccc89)C(=C)NC(=O)C(NC(=O)C(N)Cc%10ccccc%10)CCCCN
LWND01	URINE	Staphylococcus sp. HMSC06C11	[u'RIBOSOMAL']	[u'CLASS_I_LANTIPEPTIDE']	4	106_["Lanthionine containing peptide","HYICIN M51"]	0.666667	O=C(N)CC5NC(=O)C(NC(=O)C(NC(=O)CNC(=O)C(=CC)NC(=O)C(NC(=O)C(NC(=O)C3NC(=O)CNC(=O)C4N(C(=O)C(NC(=O)C1NC(=O)C(NC(=O)C(NC(=O)C(=C)NC(=O)C(NC(=O)C(=CC)NC(=O)C(N)C(C)CC)CSC1)Cc2ccccc2)CC(C)C)C(C)SC3)CCC4)C)CCCCN)CSCC6NC(=O)C(NC(=O)C(NC5(=O))CSC=CNC6(=O))Cc7ccc(O)cc7)Cc8ccccc8
LNMH01	STOOL	Enterococcus faecium	[u'RIBOSOMAL']	[u'CLASS_II_BACTERIOCIN']	1	16_Bacteriocin T8	1		MKKKVLKHCVILGILGTCLAGIGTGIKVDAATYYGNGLYCNKEKCWVDWNQAKGEIGKIIVNGWVNHGPWAPRR
LNMH01	STOOL	Enterococcus faecium	[u'RIBOSOMAL']	[u'CLASS_II_BACTERIOCIN']	3	40_Enterocin A	1		MKHLKILSIKETQLIYGGTTHSGKYYGNGVYCTKNKCTVDWAKATTCIAGMSIGGFLGGAIPGKC
CEAT01	CSF	Streptococcus suis	[u'RIBOSOMAL']	[u'CLASS_II_LANTIPEPTIDE']	2	88_["A-3802-VI-7"]	0.678571	O=C(O)CCC4NC(=O)C(NC(=O)C6NC(=O)C(NC(=O)C(NC(=O)C1NC(=O)C(NC(=O)C(NC(=O)CNC(=O)C(NC(=O)C(NC(=O)C)CSC1)CO)Cc3c[nH]c2ccccc23)C(C)C)C(C)SCC(NC4(=O))C(=O)NCC(=O)NC5C(=O)NC(C(=O)NC(C(=O)NC(C(=O)NC(C(=O)NC(C(=O)OC)CS(=O)C5(C))C)CSC6(C))C(C)CC)C(C)C)CC(C)C)C(C)CC
JOSN01	STOOL	Escherichia coli 2-222-05_S3_C2	[u'RIBOSOMAL']	[u'LASSO_PEPTIDE']	6	563_["LARIATIN A"]	0.608696	OC[C@@H](C(N[C@H](C(N[C@H](C(N[C@H](C(N[C@@H](CC1=CC=C(C=C1)O)C(N[C@H](C(N[C@H](C(N[C@@H](CC2=CNC3=C2C=CC=C3)C(N[C@H](C(NCC(N[C@@H](CC4=CN=CN4)C(N[C@H](C(N[C@H](C(N[C@H](C(N[C@@H]([C@H](CC)C)C(N[C@H](C(N5CCC[C@H]5C(O)=O)=O)CCCCN)=O)=O)C(C)C)=O)CC(N)=O)=O)CO)=O)=O)=O)C(C)C)=O)=O)CC6)=O)CCCNC(N)=N)=O)=O)C(C)C)=O)CC(C)C)=O)CCC(N)=O)=O)NC(CNC6=O)=O
LVYQ01	ORAL	Streptococcus pyogenes	[u'RIBOSOMAL']	[u'LINEAR_AZOLE_CONTAINING_PEPTIDE']	2	600_["PLANTAZOLICIN B"]	0.789474	O=C(O)C(N=C(O)C1N=C(OC1(C))c2nc(oc2)c3nc(oc3)c4nc(oc4)c5nc(oc5)C(N=C(O)C(N=C(O)c6nc(oc6C)c7nc(oc7C)c%10nc(c8nc(oc8C)c9nc(C(N)CCCNC(=N)N)sc9)sc%10)C(C)CC)C(C)CC)Cc%11ccccc%11
LVYQ01	ORAL	Streptococcus pyogenes	[u'RIBOSOMAL']	[u'CLASS_I_LANTIPEPTIDE']	3	124_["STREPTIN"]	1	CC(CC1NC(C(NC(C(NC(C(NC(CNC(C(C(C)C)N)=O)=O)CSCC(C(NC(C(N2CCCC2C(NCC(NC(C(NC(C(NC(C(NC(C(NC(C(NC3C(C)C)=O)CC(C)C)=O)CCCCN)=O)CC4=CNc5c4cccc5)=O)CS6)=O)CSCC(C(NC(C(N/C(C(N/C(C(N/C(C(NC(C(NC(C(O)=O)CCCCN)=O)C(C)C)=O)=C/C)=O)=C/C)=O)=C/C)=O)Cc7ccccc7)=O)NC3=O)=O)=O)=O)C6C)=O)NC1=O)=O)CCCNC(N)=N)=O)Cc8ccc(O)cc8)=O)C
LVYQ01	ORAL	Streptococcus pyogenes	[u'RIBOSOMAL']	[u'CLASS_II_LANTIPEPTIDE']	5	121_["SALIVARICIN A"]	0.9375	CCC(C(C(NC(C(NC(C(NC(C(NC(C(NC(C(NC(C(NC(C(N1CCCC1C(NC(C(NC(C(NC(C(NC(C(NC(C(NC2CS3)=O)C(C)C)=O)Cc4ccccc4)=O)C(C)C)=O)CSCC(C(O)=O)NC2=O)=O)CC(N)=O)=O)=O)CS5)=O)CC(O)=O)=O)CC(O)=O)=O)C3C)=O)C(CC)C)=O)C5C)=O)C)=O)NC(C(NC(CNC(C(NC(CNC(C(NC(C(CCCCN)N)=O)CCCNC(N)=N)=O)=O)CO)=O)=O)CC6=CNc7c6cccc7)=O)C
LTQR01	URINE	Enterococcus sp. HMSC060D09	[u'RIBOSOMAL']	[u'CLASS_II_BACTERIOCIN']	2	40_Enterocin A	1		MKHLKILSIKETQLIYGGTTHSGKYYGNGVYCTKNKCTVDWAKATTCIAGMSIGGFLGGAIPGKC
LNMT01	STOOL	Enterococcus faecium	[u'RIBOSOMAL']	[u'CLASS_II_BACTERIOCIN']	1	40_Enterocin A	1		MKHLKILSIKETQLIYGGTTHSGKYYGNGVYCTKNKCTVDWAKATTCIAGMSIGGFLGGAIPGKC
AZLY01	GI	Enterococcus faecalis DORA_14	[u'RIBOSOMAL']	[u'BACTERIAL_HEAD_TO_TAIL_CYCLIZED']	1	79_Enterocin NKR-5-3D	0.637681	CC(C)C[C@@H](C(N[C@H](C(N[C@@H](C)C(N[C@H](C(N[C@H](C(NCC(N[C@@H]([C@H](CC)C)C(N[C@H](C(N[C@H](C(N[C@@H](CC1=CC=C(C=C1)O)C(N[C@@H](C)C(N[C@@H](C)C(N[C@H](C(N[C@H](C(N[C@H](C(N[C@@H]([C@H](CC)C)C(N[C@@H](CC(O)=O)C(N[C@@H]([C@H](CC)C)C(N[C@@H]([C@H](CC)C)C(N[C@H](C(N[C@H](C(NCC(N[C@H](C(N[C@@H](C)C(N[C@H](C(N[C@@H](C)C(N[C@H](C(N[C@@H]([C@H](CC)C)C(N[C@@H]([C@H](CC)C)C(N[C@@H](C)C(N[C@H](C(N[C@H](C…
CEBF01	CSF	Streptococcus suis	[u'RIBOSOMAL']	[u'CLASS_II_LANTIPEPTIDE']	1	88_["A-3802-VI-7"]	0.678571	O=C(O)CCC4NC(=O)C(NC(=O)C6NC(=O)C(NC(=O)C(NC(=O)C1NC(=O)C(NC(=O)C(NC(=O)CNC(=O)C(NC(=O)C(NC(=O)C)CSC1)CO)Cc3c[nH]c2ccccc23)C(C)C)C(C)SCC(NC4(=O))C(=O)NCC(=O)NC5C(=O)NC(C(=O)NC(C(=O)NC(C(=O)NC(C(=O)NC(C(=O)OC)CS(=O)C5(C))C)CSC6(C))C(C)CC)C(C)C)CC(C)C)C(C)CC
LFVG01	SKIN	Staphylococcus aureus subsp. aureus	[u'RIBOSOMAL']	[u'CLASS_I_LANTIPEPTIDE']	4	105_["Lanthionine containing peptide","HYICIN M51"]	0.952381	O=C(N)CC5NC(=O)C(NC(=O)C(NC(=O)CNC(=O)C(=CC)NC(=O)C(NC(=O)C(NC(=O)C3NC(=O)CNC(=O)C4N(C(=O)C(NC(=O)C1NC(=O)C(NC(=O)C(=C)NC(=O)C(NC(=O)C(NC(=O)C(=CC)NC(=O)C(N)C(C)CC)CSC1)Cc2ccccc2)CC(C)C)C(C)SC3)CCC4)C)CCCCN)CSCC6NC(=O)C(NC(=O)C(NC5(=O))CSC=CNC6(=O))Cc7ccc(O)cc7)Cc8ccccc8
AWPG01	ORAL	Streptococcus pyogenes SP10-LAU	[u'RIBOSOMAL']	[u'LINEAR_AZOLE_CONTAINING_PEPTIDE']	1	600_["PLANTAZOLICIN B"]	0.789474	O=C(O)C(N=C(O)C1N=C(OC1(C))c2nc(oc2)c3nc(oc3)c4nc(oc4)c5nc(oc5)C(N=C(O)C(N=C(O)c6nc(oc6C)c7nc(oc7C)c%10nc(c8nc(oc8C)c9nc(C(N)CCCNC(=N)N)sc9)sc%10)C(C)CC)C(C)CC)Cc%11ccccc%11
AWPG01	ORAL	Streptococcus pyogenes SP10-LAU	[u'RIBOSOMAL']	[u'CLASS_II_LANTIPEPTIDE']	3	121_["SALIVARICIN A"]	0.9375	CCC(C(C(NC(C(NC(C(NC(C(NC(C(NC(C(NC(C(NC(C(N1CCCC1C(NC(C(NC(C(NC(C(NC(C(NC(C(NC2CS3)=O)C(C)C)=O)Cc4ccccc4)=O)C(C)C)=O)CSCC(C(O)=O)NC2=O)=O)CC(N)=O)=O)=O)CS5)=O)CC(O)=O)=O)CC(O)=O)=O)C3C)=O)C(CC)C)=O)C5C)=O)C)=O)NC(C(NC(CNC(C(NC(CNC(C(NC(C(CCCCN)N)=O)CCCNC(N)=N)=O)=O)CO)=O)=O)CC6=CNc7c6cccc7)=O)C
JPNW01	RESPIRATORY	Burkholderia pseudomallei	[u'RIBOSOMAL']	[u'LASSO_PEPTIDE']	6	561_["CAPISTRUIN"]	1	O[C@H](C)[C@@H](C(N1CCC[C@H]1C(NCC(N[C@@H](CC2=CC=CC=C2)C(N[C@H](C(N[C@H](C(N3CCC[C@H]3C(N[C@@H](C4)C(N[C@@H](C)C(N[C@H](C(N[C@H](C(N[C@@H]([C@H](CC)C)C(N[C@H](C(N[C@H](C(N[C@@H](CC5=CC=CC=C5)C(NCC(N[C@@H](CC6=CC=CC=C6)C(N[C@H](C(O)=O)CC(N)=O)=O)=O)=O)=O)CCCNC(N)=N)=O)CO)=O)=O)C(C)C)=O)CCCNC(N)=N)=O)=O)=O)=O)[C@@H](C)O)=O)CCC(N)=O)=O)=O)=O)=O)NC(CNC4=O)=O
CDTB01	CSF	Streptococcus suis	[u'RIBOSOMAL']	[u'LASSO_PEPTIDE']	2	578_["STREPTOMONOMICIN"]	0.576923	OC(C=C1)=CC=C1C[C@@H](C(N[C@@H](CC(N)=O)C(N[C@H](C(N[C@H](C(N[C@@H](CC(C)C)C(NCC(N[C@H](C(N2CCC[C@H]2C(N[C@H](C(N[C@@H](CC(C)C)C(N[C@H](C(N[C@@H](C(C)C)C(N[C@H](C(N[C@H](C(N3CCC[C@H]3C(O)=O)=O)CC4=CC=C(O)C=C4)=O)[C@@H](C)CC)=O)=O)[C@@H](C)CC)=O)=O)C)=O)=O)CC5=CC=C(O)C=C5)=O)=O)=O)[C@@H](C)CC)=O)C6)=O)=O)NC([C@@H]7CCCN7C([C@H](CO)NC([C@H](CO)NC(CNC([C@H](CC(C)C)NC([C@H](CO)NC6=O)=O)=O)=O)=O)=O)=O
LRGL01	SKIN	Streptococcus pyogenes	[u'RIBOSOMAL']	[u'CLASS_II_LANTIPEPTIDE']	2	121_["SALIVARICIN A"]	0.9375	CCC(C(C(NC(C(NC(C(NC(C(NC(C(NC(C(NC(C(NC(C(N1CCCC1C(NC(C(NC(C(NC(C(NC(C(NC(C(NC2CS3)=O)C(C)C)=O)Cc4ccccc4)=O)C(C)C)=O)CSCC(C(O)=O)NC2=O)=O)CC(N)=O)=O)=O)CS5)=O)CC(O)=O)=O)CC(O)=O)=O)C3C)=O)C(CC)C)=O)C5C)=O)C)=O)NC(C(NC(CNC(C(NC(CNC(C(NC(C(CCCCN)N)=O)CCCNC(N)=N)=O)=O)CO)=O)=O)CC6=CNc7c6cccc7)=O)C
LRGL01	SKIN	Streptococcus pyogenes	[u'RIBOSOMAL']	[u'LINEAR_AZOLE_CONTAINING_PEPTIDE']	4	600_["PLANTAZOLICIN B"]	0.789474	O=C(O)C(N=C(O)C1N=C(OC1(C))c2nc(oc2)c3nc(oc3)c4nc(oc4)c5nc(oc5)C(N=C(O)C(N=C(O)c6nc(oc6C)c7nc(oc7C)c%10nc(c8nc(oc8C)c9nc(C(N)CCCNC(=N)N)sc9)sc%10)C(C)CC)C(C)CC)Cc%11ccccc%11
LBLK01	VAGINA	Streptococcus agalactiae	[u'RIBOSOMAL']	[u'CLASS_I_LANTIPEPTIDE']	2	148_["NISIN U"]	0.941176	CCC(C(C(N/C(C(NC(C(NC(C(NC(C(NC1CC(C)C)=O)=C)=O)CCCCN)=O)CSCC(C(NC(C(N2CCCC2C(NCC(NC(C(NC(C(NC(C(NCC(NC(C(NC(C(NC(C(N/C(C(NC(C(N3CCCC3C(NC(C(NC(C(NC(C(NC(C(NC(C(NC(C(NCC(NC(C(NC(C(NC(C(NCC(O)=O)=O)Cc4ccccc4)=O)Cc5nc[nH]c5)=O)CS6)=O)=O)CS7)=O)C6C)=O)C)=O)C7C)=O)CCCCN)=O)CC(C)C)=O)=O)CS8)=O)=C\C)=O)CCSC)=O)CC(C)C)=O)C(CC)C)=O)=O)C8C)=O)CCCCN)=O)CS9)=O)=O)=O)C9C)=O)NC1=O)=O)=C\C)=O)N)C
AGMH01	ORAL	Streptococcus mutans TCI-279	[u'RIBOSOMAL']	[u'CLASS_II_BACTERIOCIN']	2	69_Antimicrobial protein BL-A60	0.545455		MNTRMMEQFETMDAETLSHVTGGGLYDGANGYAYRDSQGHWAYKVTKTPAQALTDVVVNSWASGAASFAAYA
JFIL01	RESPIRATORY	Legionella pneumophila subsp. pneumophila ATCC 33215	[u'RIBOSOMAL']	[u'LASSO_PEPTIDE']	5	276_["PRE-T","10381-T","PRE-10381-T"]	0.571429	O=C(N)c3nc4c1nc(oc1C)C(NC(=O)c6nc(C(NC(=O)c2nc(oc2C)CNC(=O)C(NC(=O)c5nc(c4(cc3))sc5)C(C)C)C)sc6)C
CDUS01	CSF	Streptococcus suis	[u'RIBOSOMAL']	[u'CLASS_II_LANTIPEPTIDE']	1	88_["A-3802-VI-7"]	0.678571	O=C(O)CCC4NC(=O)C(NC(=O)C6NC(=O)C(NC(=O)C(NC(=O)C1NC(=O)C(NC(=O)C(NC(=O)CNC(=O)C(NC(=O)C(NC(=O)C)CSC1)CO)Cc3c[nH]c2ccccc23)C(C)C)C(C)SCC(NC4(=O))C(=O)NCC(=O)NC5C(=O)NC(C(=O)NC(C(=O)NC(C(=O)NC(C(=O)NC(C(=O)OC)CS(=O)C5(C))C)CSC6(C))C(C)CC)C(C)C)CC(C)C)C(C)CC
JGOO01	RESPIRATORY	Staphylococcus aureus DAR3599	[u'RIBOSOMAL']	[u'BACTERIAL_HEAD_TO_TAIL_CYCLIZED']	3	595_Syanodin I	0.590909	CC(C[C@@H](C(N[C@H](C(NCC(O)=O)=O)C)=O)NC(CNC([C@@H](NC(CNC([C@@H](NC([C@@H]1CCCN1C([C@@H](NC([C@@H]2CC(NCC(N[C@H](C(N[C@H](C(NCC(NCC(N[C@H](C(N[C@H](C(N2)=O)C(C)C)=O)[C@H](O)C)=O)=O)=O)CO)=O)CC(C)C)=O)=O)=O)C)=O)=O)C)=O)=O)CCC(N)=O)=O)=O)C
CDWB01	CSF	Streptococcus suis	[u'RIBOSOMAL']	[u'CLASS_II_LANTIPEPTIDE']	1	88_["A-3802-VI-7"]	0.678571	O=C(O)CCC4NC(=O)C(NC(=O)C6NC(=O)C(NC(=O)C(NC(=O)C1NC(=O)C(NC(=O)C(NC(=O)CNC(=O)C(NC(=O)C(NC(=O)C)CSC1)CO)Cc3c[nH]c2ccccc23)C(C)C)C(C)SCC(NC4(=O))C(=O)NCC(=O)NC5C(=O)NC(C(=O)NC(C(=O)NC(C(=O)NC(C(=O)NC(C(=O)OC)CS(=O)C5(C))C)CSC6(C))C(C)CC)C(C)C)CC(C)C)C(C)CC
LNMF01	STOOL	Enterococcus faecium	[u'RIBOSOMAL']	[u'CLASS_II_BACTERIOCIN']	1	40_Enterocin A	1		MHIKNTKTTFILSSEELKNIQGGSAVGVLGTTFSGATAGVKLCSAGGPYAIAACGVGGALLGAGFSMWTGA
LNMF01	STOOL	Enterococcus faecium	[u'RIBOSOMAL']	[u'CLASS_II_BACTERIOCIN']	2	16_Bacteriocin T8	1		MKKKVLKHCVILGILGTCLAGIGTGIKVDAATYYGNGLYCNKEKCWVDWNQAKGEIGKIIVNGWVNHGPWAPRR
LRGF01	SKIN	Streptococcus pyogenes	[u'RIBOSOMAL']	[u'CLASS_II_LANTIPEPTIDE']	2	121_["SALIVARICIN A"]	0.9375	CCC(C(C(NC(C(NC(C(NC(C(NC(C(NC(C(NC(C(NC(C(N1CCCC1C(NC(C(NC(C(NC(C(NC(C(NC(C(NC2CS3)=O)C(C)C)=O)Cc4ccccc4)=O)C(C)C)=O)CSCC(C(O)=O)NC2=O)=O)CC(N)=O)=O)=O)CS5)=O)CC(O)=O)=O)CC(O)=O)=O)C3C)=O)C(CC)C)=O)C5C)=O)C)=O)NC(C(NC(CNC(C(NC(CNC(C(NC(C(CCCCN)N)=O)CCCNC(N)=N)=O)=O)CO)=O)=O)CC6=CNc7c6cccc7)=O)C
LRGF01	SKIN	Streptococcus pyogenes	[u'RIBOSOMAL']	[u'LINEAR_AZOLE_CONTAINING_PEPTIDE']	4	600_["PLANTAZOLICIN B"]	0.789474	O=C(O)C(N=C(O)C1N=C(OC1(C))c2nc(oc2)c3nc(oc3)c4nc(oc4)c5nc(oc5)C(N=C(O)C(N=C(O)c6nc(oc6C)c7nc(oc7C)c%10nc(c8nc(oc8C)c9nc(C(N)CCCNC(=N)N)sc9)sc%10)C(C)CC)C(C)CC)Cc%11ccccc%11
JGRP01	RESPIRATORY	Staphylococcus aureus DAR1200	[u'RIBOSOMAL']	[u'BACTERIAL_HEAD_TO_TAIL_CYCLIZED']	3	595_Syanodin I	0.590909	CC(C[C@@H](C(N[C@H](C(NCC(O)=O)=O)C)=O)NC(CNC([C@@H](NC(CNC([C@@H](NC([C@@H]1CCCN1C([C@@H](NC([C@@H]2CC(NCC(N[C@H](C(N[C@H](C(NCC(NCC(N[C@H](C(N[C@H](C(N2)=O)C(C)C)=O)[C@H](O)C)=O)=O)=O)CO)=O)CC(C)C)=O)=O)=O)C)=O)=O)C)=O)=O)CCC(N)=O)=O)=O)C
CDUK01	CSF	Streptococcus suis	[u'RIBOSOMAL']	[u'CLASS_II_LANTIPEPTIDE']	2	88_["A-3802-VI-7"]	0.678571	O=C(O)CCC4NC(=O)C(NC(=O)C6NC(=O)C(NC(=O)C(NC(=O)C1NC(=O)C(NC(=O)C(NC(=O)CNC(=O)C(NC(=O)C(NC(=O)C)CSC1)CO)Cc3c[nH]c2ccccc23)C(C)C)C(C)SCC(NC4(=O))C(=O)NCC(=O)NC5C(=O)NC(C(=O)NC(C(=O)NC(C(=O)NC(C(=O)NC(C(=O)OC)CS(=O)C5(C))C)CSC6(C))C(C)CC)C(C)C)CC(C)C)C(C)CC
AGKR01	ORAL	Streptococcus mutans TCI-149	[u'RIBOSOMAL']	[u'CLASS_II_BACTERIOCIN']	2	69_Antimicrobial protein BL-A60	0.545455		MLVDILTIKKGGIHMNTRMMEQFETMDAETLSHVTGGGLYDGANGYAYRDSQGHWAYKVTKTPAQALTDVVVNSWASGAASFAAYA
LNLC01	STOOL	Enterococcus faecium	[u'RIBOSOMAL']	[u'CLASS_II_BACTERIOCIN']	1	16_Bacteriocin T8	1		MKKKVLKHCVILGILGTCLAGIGTGIKVDAATYYGNGLYCNKEKCWVDWNQAKGEIGKIIVNGWVNHGPWAPRR
LNLC01	STOOL	Enterococcus faecium	[u'RIBOSOMAL']	[u'CLASS_II_BACTERIOCIN']	3	40_Enterocin A	1		MKHLKILSIKETQLIYGGTTHSGKYYGNGVYCTKNKCTVDWAKATTCIAGMSIGGFLGGAIPGKC
LNLW01	STOOL	Enterococcus faecium	[u'RIBOSOMAL']	[u'CLASS_II_BACTERIOCIN']	1	40_Enterocin A	1		MKHLKILSIKETQLIYGGTTHSGKYYGNGVYCTKNKCTVDWAKATTCIAGMSIGGFLGGAIPGKC
AGLE01	ORAL	Streptococcus mutans TCI-179	[u'RIBOSOMAL']	[u'CLASS_II_BACTERIOCIN']	2	69_Antimicrobial protein BL-A60	0.545455		MLVDILTIKKGGIHMNTRMMEQFETMDAETLSHVTGGGLYDGANGYAYRDSQGHWAYKVTKTPAQALTDVVVNSWASGAASFAAYA
APNV01	URINE	Escherichia coli HM69	[u'RIBOSOMAL']	[u'LINEAR_AZOLE_CONTAINING_PEPTIDE']	5	601_["MccB17","MICROCIN B17","MICROCIN 17W"]	1	O=C(O)C(N=C(O)C(N=C(O)C(N=C(O)CN=C(O)c1nc(oc1)CN=C(O)CN=C(O)c2nc(oc2)CN=C(O)CN=C(O)C(N=C(O)CN=C(O)CN=C(O)c3nc(oc3)c8nc(CN=C(O)C(N=C(O)C(N=C(O)c7nc(CN=C(O)CN=C(O)c6nc(CN=C(O)CN=C(O)CN=C(O)C(N=C(O)CN=C(O)CN=C(O)c5nc(c4nc(oc4)CN=C(O)CN=C(O)CN=C(O)CN=C(O)CN=C(O)CN=C(O)CN=C(O)CN=C(O)CN=C(O)CN=C(O)C(N=C(O)CN=C(O)C(N)C(C)C)C(C)CC)sc5)CCC(=N)O)sc6)sc7)CO)CC(=N)O)sc8)CC(=N)O)CO)Cc9cnc[nH]9)C(C)CC
ALCN01	CSF	Streptococcus pneumoniae GA54354	[u'RIBOSOMAL']	[u'CLASS_II_BACTERIOCIN']	3	6_Bacteriocin amylovorin-L	0.56		MMSQFAVMDNEMLACVEGGDIDWGRKISCTAGVAYGAIDGCATTV
ALCN01	CSF	Streptococcus pneumoniae GA54354	[u'RIBOSOMAL']	[u'CLASS_III_IV_LANTIPEPTIDE']	4	122_[MUTACIN B-NY266"]	0.595238	C/C=C(C(NCC(NC(C(NC(C(NC(C(NC(C(NC1Cc2ccc(O)cc2)=O)CS/C=C/NC3=O)=O)CC(N)=O)=O)Cc4ccccc4)=O)CSCC3NC1=O)=O)=O)\NC(C(NC(C(NC(C(NC(CNC(C5CCCN56)=O)=O)CSC(C)C(NC(C(NC(C(NC(C(NC(C(N7)CC8=CNc9c8cccc9)=O)=C)=O)Cc%10ccccc%10)=O)CSCC(NC(C(NC(C(Cc%11ccccc%11)N)=O)CCCCN)=O)C7=O)=O)C6=O)=O)C)=O)CCCCN)=O
MAWI01	VAGINA	Streptococcus agalactiae	[u'RIBOSOMAL']	[u'CLASS_I_LANTIPEPTIDE']	3	148_["NISIN U"]	0.941176	CCC(C(C(N/C(C(NC(C(NC(C(NC(C(NC1CC(C)C)=O)=C)=O)CCCCN)=O)CSCC(C(NC(C(N2CCCC2C(NCC(NC(C(NC(C(NC(C(NCC(NC(C(NC(C(NC(C(N/C(C(NC(C(N3CCCC3C(NC(C(NC(C(NC(C(NC(C(NC(C(NC(C(NCC(NC(C(NC(C(NC(C(NCC(O)=O)=O)Cc4ccccc4)=O)Cc5nc[nH]c5)=O)CS6)=O)=O)CS7)=O)C6C)=O)C)=O)C7C)=O)CCCCN)=O)CC(C)C)=O)=O)CS8)=O)=C\C)=O)CCSC)=O)CC(C)C)=O)C(CC)C)=O)=O)C8C)=O)CCCCN)=O)CS9)=O)=O)=O)C9C)=O)NC1=O)=O)=C\C)=O)N)C
LNLX01	STOOL	Enterococcus faecium	[u'RIBOSOMAL']	[u'CLASS_II_BACTERIOCIN']	1	16_Bacteriocin T8	1		MKKKVLKHCVILGILGTCLAGIGTGIKVDAATYYGNGLYCNKEKCWVDWNQAKGEIGKIIVNGWVNHGPWAPRR
LNLX01	STOOL	Enterococcus faecium	[u'RIBOSOMAL']	[u'CLASS_II_BACTERIOCIN']	4	40_Enterocin A	1		MKHLKILSIKETQLIYGGTTHSGKYYGNGVYCTKNKCTVDWAKATTCIAGMSIGGFLGGAIPGKC
FKLI01	STOOL	Enterococcus faecium	[u'RIBOSOMAL']	[u'CLASS_II_BACTERIOCIN']	1	40_Enterocin A	1		MKHLKILSIKETQLIYGGTTHSGKYYGNGVYCTKNKCTVDWAKATTCIAGMSIGGFLGGAIPGKC
BCYJ01	STOOL	Bifidobacterium longum subsp. longum	[u'RIBOSOMAL']	[u'CLASS_II_LANTIPEPTIDE']	1	199_Microbisporicin B	0.727273	NC(C(N/C(C(NC(C(NC(C(C)C)C(NC(C(NC1CC(C)C)=O)=C)=O)=O)CSCC(C(NC2C(NC(C(NC(CC3=CC=CC=C3)C(NC(CSC2C)C(NC(C(NC4C(NC(C(NCC(NCC(NCC(NC5C(NC(C(NC(CSC4)C(NC6C(NC(CC7=CC=CC=C7)C(NC(CSC5)C(N/C=C\SC6)=O)=O)=O)=O)=O)CC8=CC=CC=C8)=O)=O)=O)=O)=O)CCC(N)=O)=O)=O)C(C)O)=O)=O)=O)C)=O)=O)NC1=O)=O)=C\C)=O)C(C)CC
AGMZ01	ORAL	Streptococcus mutans TCI-96	[u'RIBOSOMAL']	[u'CLASS_II_BACTERIOCIN']	3	69_Antimicrobial protein BL-A60	0.545455		MLVDILTIKKGGIHMNTKMMKQFETMDAETLSHITGGGLYDGANGYAYRDSQGHWAYKVTKTPAQALTDVVVNSWASGAASFAAYA
MBLK01	VAGINA	Streptococcus agalactiae	[u'RIBOSOMAL']	[u'CLASS_I_LANTIPEPTIDE']	3	148_["NISIN U"]	0.941176	CCC(C(C(N/C(C(NC(C(NC(C(NC(C(NC1CC(C)C)=O)=C)=O)CCCCN)=O)CSCC(C(NC(C(N2CCCC2C(NCC(NC(C(NC(C(NC(C(NCC(NC(C(NC(C(NC(C(N/C(C(NC(C(N3CCCC3C(NC(C(NC(C(NC(C(NC(C(NC(C(NC(C(NCC(NC(C(NC(C(NC(C(NCC(O)=O)=O)Cc4ccccc4)=O)Cc5nc[nH]c5)=O)CS6)=O)=O)CS7)=O)C6C)=O)C)=O)C7C)=O)CCCCN)=O)CC(C)C)=O)=O)CS8)=O)=C\C)=O)CCSC)=O)CC(C)C)=O)C(CC)C)=O)=O)C8C)=O)CCCCN)=O)CS9)=O)=O)=O)C9C)=O)NC1=O)=O)=C\C)=O)N)C
AGMF01	ORAL	Streptococcus mutans TCI-268	[u'RIBOSOMAL']	[u'CLASS_II_BACTERIOCIN']	3	69_Antimicrobial protein BL-A60	0.545455		MLVDILTIKKGGIHMNTRMMEQFETMDAETLSHVTGGGLYDGANGYAYRDSQGHWAYKVTKTPAQALTDVVVNSWASGAASFAAYA
AGMJ01	ORAL	Streptococcus mutans TCI-289	[u'RIBOSOMAL']	[u'CLASS_II_BACTERIOCIN']	2	69_Antimicrobial protein BL-A60	0.545455		MNTRMMEQFETMDAETLSHVTGGGLYDGANGYAYRDSQGHWAYKVTKTPAQALTDVVVNSWASGAASFAAYA
APLG01	RESPIRATORY	Burkholderia pseudomallei LMF	[u'RIBOSOMAL']	[u'LASSO_PEPTIDE']	8	547_["MICROVIRIDIN-C"]	0.555556	[H]C(O)(C)C([H])(NC(=O)CNC(=O)C([H])(NC(=O)C)Cc1ccccc1)C(=O)NC6([H])(C(=O)NC([H])(C(=O)NC3([H])(C(=O)NC([H])(C(=O)N7CCCC7([H])(C(=O)NC([H])(C(=O)NC([H])(C(=O)NC([H])(C(=O)NC([H])(C(=O)NC([H])(C(=O)NC([H])(C(=O)O)Cc2ccc(O)cc2)CCC(=O)NCCCC3)CCC(=O)OC)Cc4cc5ccccc5([nH]4))CC(=O)OC6([H])(C))CO))Cc8ccc(O)cc8))CC(C)C)
AHRV01	ORAL	Streptococcus mutans NFSM2	[u'RIBOSOMAL']	[u'CLASS_II_BACTERIOCIN']	4	69_Antimicrobial protein BL-A60	0.545455		MNTKMMEQFETMDAETLSHVTGGGLYDGANGYAYRDSQGHWAYKVTKTPAQALTDVVVNSWASGAASFAAYA
LRGW01	SKIN	Streptococcus pyogenes	[u'RIBOSOMAL']	[u'LINEAR_AZOLE_CONTAINING_PEPTIDE']	2	600_["PLANTAZOLICIN B"]	0.789474	O=C(O)C(N=C(O)C1N=C(OC1(C))c2nc(oc2)c3nc(oc3)c4nc(oc4)c5nc(oc5)C(N=C(O)C(N=C(O)c6nc(oc6C)c7nc(oc7C)c%10nc(c8nc(oc8C)c9nc(C(N)CCCNC(=N)N)sc9)sc%10)C(C)CC)C(C)CC)Cc%11ccccc%11
LRGW01	SKIN	Streptococcus pyogenes	[u'RIBOSOMAL']	[u'CLASS_II_LANTIPEPTIDE']	3	121_["SALIVARICIN A"]	0.9375	CCC(C(C(NC(C(NC(C(NC(C(NC(C(NC(C(NC(C(NC(C(N1CCCC1C(NC(C(NC(C(NC(C(NC(C(NC(C(NC2CS3)=O)C(C)C)=O)Cc4ccccc4)=O)C(C)C)=O)CSCC(C(O)=O)NC2=O)=O)CC(N)=O)=O)=O)CS5)=O)CC(O)=O)=O)CC(O)=O)=O)C3C)=O)C(CC)C)=O)C5C)=O)C)=O)NC(C(NC(CNC(C(NC(CNC(C(NC(C(CCCCN)N)=O)CCCNC(N)=N)=O)=O)CO)=O)=O)CC6=CNc7c6cccc7)=O)C
LNMD01	STOOL	Enterococcus faecium	[u'RIBOSOMAL']	[u'CLASS_II_BACTERIOCIN']	2	16_Bacteriocin T8	1		MKKKVLKHCVILGILGTCLAGIGTGIKVDAATYYGNGLYCNKEKCWVDWNQAKGEIGKIIVNGWVNHGPWAPRR
LNMD01	STOOL	Enterococcus faecium	[u'RIBOSOMAL']	[u'CLASS_II_BACTERIOCIN']	4	40_Enterocin A	1		MKHLKILSIKETQLIYGGTTHSGKYYGNGVYCTKNKCTVDWAKATTCIAGMSIGGFLGGAIPGKC
CDUB01	CSF	Streptococcus suis	[u'RIBOSOMAL']	[u'CLASS_I_LANTIPEPTIDE']	2	148_["NISIN U"]	0.941176	CCC(C(C(N/C(C(NC(C(NC(C(NC(C(NC1CC(C)C)=O)=C)=O)CCCCN)=O)CSCC(C(NC(C(N2CCCC2C(NCC(NC(C(NC(C(NC(C(NCC(NC(C(NC(C(NC(C(N/C(C(NC(C(N3CCCC3C(NC(C(NC(C(NC(C(NC(C(NC(C(NC(C(NCC(NC(C(NC(C(NC(C(NCC(O)=O)=O)Cc4ccccc4)=O)Cc5nc[nH]c5)=O)CS6)=O)=O)CS7)=O)C6C)=O)C)=O)C7C)=O)CCCCN)=O)CC(C)C)=O)=O)CS8)=O)=C\C)=O)CCSC)=O)CC(C)C)=O)C(CC)C)=O)=O)C8C)=O)CCCCN)=O)CS9)=O)=O)=O)C9C)=O)NC1=O)=O)=C\C)=O)N)C
CEBW01	CSF	Streptococcus suis	[u'RIBOSOMAL']	[u'CLASS_II_LANTIPEPTIDE']	1	88_["A-3802-VI-7"]	0.678571	O=C(O)CCC4NC(=O)C(NC(=O)C6NC(=O)C(NC(=O)C(NC(=O)C1NC(=O)C(NC(=O)C(NC(=O)CNC(=O)C(NC(=O)C(NC(=O)C)CSC1)CO)Cc3c[nH]c2ccccc23)C(C)C)C(C)SCC(NC4(=O))C(=O)NCC(=O)NC5C(=O)NC(C(=O)NC(C(=O)NC(C(=O)NC(C(=O)NC(C(=O)OC)CS(=O)C5(C))C)CSC6(C))C(C)CC)C(C)C)CC(C)C)C(C)CC
LTSA01	STOOL	Enterococcus sp. HMSC034B11	[u'RIBOSOMAL']	[u'CLASS_II_BACTERIOCIN']	5	40_Enterocin A	1		MKHLKILSIKETQLIYGGTTHSGKYYGNGVYCTKNKCTVDWAKATTCIAGMSIGGFLGGAIPGKC
ANKF01	STOOL	Lactobacillus paracasei subsp. paracasei Lpp221	[u'RIBOSOMAL']	[u'CLASS_II_BACTERIOCIN']	2	546_["MICROVIRIDIN-B"]	0.555556		MELLNEKELAHVIGGKRKCPKTPFDNTPGAWFAHLILGC
LNMA01	STOOL	Enterococcus faecium	[u'RIBOSOMAL']	[u'CLASS_II_BACTERIOCIN']	2	16_Bacteriocin T8	1		MKKKVLKHCVILGILGTCLAGIGTGIKVDAATYYGNGLYCNKEKCWVDWNQAKGEIGKIIVNGWVNHGPWAPRR
LNMA01	STOOL	Enterococcus faecium	[u'RIBOSOMAL']	[u'CLASS_II_BACTERIOCIN']	3	40_Enterocin A	1		MKHLKILSIKETQLIYGGTTHSGKYYGNGVYCTKNKCTVDWAKATTCIAGMSIGGFLGGAIPGKC
JSCF01	STOOL	Clostridium botulinum	[u'RIBOSOMAL']	[u'LINEAR_AZOLE_CONTAINING_PEPTIDE']	3	603_clostridiolysin_S	0.9	NC(CS)C1=NC(C2=NC(C3=NC(C4=NC(C5=NC(C6=NC(C7=NC(C8=NC(C(NC(C9=NC(C(NC(C%10=NC(C(NC(C(NCC(NCC(NCC%11=NC(C(NC(C)C%12=NC(C%13=NC(C(NCC(NCC(NCC(NC(C)C(NC(C)C(NC(C)C(NCC(NC(C(NCC(NCC(NC(C(O)=O)CC(N)=O)=O)=O)=O)CCC(N)=O)=O)=O)=O)=O)=O)=O)=O)=O)=C(C)O%13)=CO%12)=O)=CO%11)=O)=O)=O)C(C)C)=O)=CO%10)C(C)C)=O)=CO9)C(C)C)=O)=CS8)=CS7)=CS6)=CS5)=CO4)=CS3)=CS2)=CS1
LNMU01	STOOL	Enterococcus faecium	[u'RIBOSOMAL']	[u'CLASS_II_BACTERIOCIN']	2	16_Bacteriocin T8	1		MKKKVLKHCVILGILGTCLAGIGTGIKVDAATYYGNGLYCNKEKCWVDWNQAKGEIGKIIVNGWVNHGPWAPRR
AHRF01	ORAL	Streptococcus mutans SF12	[u'RIBOSOMAL']	[u'CLASS_II_BACTERIOCIN']	5	69_Antimicrobial protein BL-A60	0.545455		MLVDILTIKKGGIHMNTRMMEQFETMDAETLSHVTGGGLYDGANGYAYRDSQGHWAYKVTKTPAQALTDVVVNSWASGAASFAAYA
CDUQ01	CSF	Streptococcus suis	[u'RIBOSOMAL']	[u'CLASS_II_LANTIPEPTIDE']	1	88_["A-3802-VI-7"]	0.678571	O=C(O)CCC4NC(=O)C(NC(=O)C6NC(=O)C(NC(=O)C(NC(=O)C1NC(=O)C(NC(=O)C(NC(=O)CNC(=O)C(NC(=O)C(NC(=O)C)CSC1)CO)Cc3c[nH]c2ccccc23)C(C)C)C(C)SCC(NC4(=O))C(=O)NCC(=O)NC5C(=O)NC(C(=O)NC(C(=O)NC(C(=O)NC(C(=O)NC(C(=O)OC)CS(=O)C5(C))C)CSC6(C))C(C)CC)C(C)C)CC(C)C)C(C)CC
LRGV01	SKIN	Streptococcus pyogenes	[u'RIBOSOMAL']	[u'LINEAR_AZOLE_CONTAINING_PEPTIDE']	1	600_["PLANTAZOLICIN B"]	0.789474	O=C(O)C(N=C(O)C1N=C(OC1(C))c2nc(oc2)c3nc(oc3)c4nc(oc4)c5nc(oc5)C(N=C(O)C(N=C(O)c6nc(oc6C)c7nc(oc7C)c%10nc(c8nc(oc8C)c9nc(C(N)CCCNC(=N)N)sc9)sc%10)C(C)CC)C(C)CC)Cc%11ccccc%11
LRGV01	SKIN	Streptococcus pyogenes	[u'RIBOSOMAL']	[u'CLASS_I_LANTIPEPTIDE']	3	124_["STREPTIN"]	1	CC(CC1NC(C(NC(C(NC(C(NC(CNC(C(C(C)C)N)=O)=O)CSCC(C(NC(C(N2CCCC2C(NCC(NC(C(NC(C(NC(C(NC(C(NC(C(NC3C(C)C)=O)CC(C)C)=O)CCCCN)=O)CC4=CNc5c4cccc5)=O)CS6)=O)CSCC(C(NC(C(N/C(C(N/C(C(N/C(C(NC(C(NC(C(O)=O)CCCCN)=O)C(C)C)=O)=C/C)=O)=C/C)=O)=C/C)=O)Cc7ccccc7)=O)NC3=O)=O)=O)=O)C6C)=O)NC1=O)=O)CCCNC(N)=N)=O)Cc8ccc(O)cc8)=O)C
LRGV01	SKIN	Streptococcus pyogenes	[u'RIBOSOMAL']	[u'CLASS_II_LANTIPEPTIDE']	5	121_["SALIVARICIN A"]	0.9375	CCC(C(C(NC(C(NC(C(NC(C(NC(C(NC(C(NC(C(NC(C(N1CCCC1C(NC(C(NC(C(NC(C(NC(C(NC(C(NC2CS3)=O)C(C)C)=O)Cc4ccccc4)=O)C(C)C)=O)CSCC(C(O)=O)NC2=O)=O)CC(N)=O)=O)=O)CS5)=O)CC(O)=O)=O)CC(O)=O)=O)C3C)=O)C(CC)C)=O)C5C)=O)C)=O)NC(C(NC(CNC(C(NC(CNC(C(NC(C(CCCCN)N)=O)CCCNC(N)=N)=O)=O)CO)=O)=O)CC6=CNc7c6cccc7)=O)C
JSNT01	URINE	Escherichia coli	[u'RIBOSOMAL']	[u'LINEAR_AZOLE_CONTAINING_PEPTIDE']	2	601_["MccB17","MICROCIN B17","MICROCIN 17W"]	1	O=C(O)C(N=C(O)C(N=C(O)C(N=C(O)CN=C(O)c1nc(oc1)CN=C(O)CN=C(O)c2nc(oc2)CN=C(O)CN=C(O)C(N=C(O)CN=C(O)CN=C(O)c3nc(oc3)c8nc(CN=C(O)C(N=C(O)C(N=C(O)c7nc(CN=C(O)CN=C(O)c6nc(CN=C(O)CN=C(O)CN=C(O)C(N=C(O)CN=C(O)CN=C(O)c5nc(c4nc(oc4)CN=C(O)CN=C(O)CN=C(O)CN=C(O)CN=C(O)CN=C(O)CN=C(O)CN=C(O)CN=C(O)CN=C(O)C(N=C(O)CN=C(O)C(N)C(C)C)C(C)CC)sc5)CCC(=N)O)sc6)sc7)CO)CC(=N)O)sc8)CC(=N)O)CO)Cc9cnc[nH]9)C(C)CC
CDXV01	CSF	Streptococcus suis	[u'RIBOSOMAL']	[u'CLASS_II_LANTIPEPTIDE']	2	88_["A-3802-VI-7"]	0.678571	O=C(O)CCC4NC(=O)C(NC(=O)C6NC(=O)C(NC(=O)C(NC(=O)C1NC(=O)C(NC(=O)C(NC(=O)CNC(=O)C(NC(=O)C(NC(=O)C)CSC1)CO)Cc3c[nH]c2ccccc23)C(C)C)C(C)SCC(NC4(=O))C(=O)NCC(=O)NC5C(=O)NC(C(=O)NC(C(=O)NC(C(=O)NC(C(=O)NC(C(=O)OC)CS(=O)C5(C))C)CSC6(C))C(C)CC)C(C)C)CC(C)C)C(C)CC
JHDM01	STOOL	Escherichia coli 1-110-08_S3_C2	[u'RIBOSOMAL']	[u'LASSO_PEPTIDE']	8	563_["LARIATIN A"]	0.608696	OC[C@@H](C(N[C@H](C(N[C@H](C(N[C@H](C(N[C@@H](CC1=CC=C(C=C1)O)C(N[C@H](C(N[C@H](C(N[C@@H](CC2=CNC3=C2C=CC=C3)C(N[C@H](C(NCC(N[C@@H](CC4=CN=CN4)C(N[C@H](C(N[C@H](C(N[C@H](C(N[C@@H]([C@H](CC)C)C(N[C@H](C(N5CCC[C@H]5C(O)=O)=O)CCCCN)=O)=O)C(C)C)=O)CC(N)=O)=O)CO)=O)=O)=O)C(C)C)=O)=O)CC6)=O)CCCNC(N)=N)=O)=O)C(C)C)=O)CC(C)C)=O)CCC(N)=O)=O)NC(CNC6=O)=O
LFVK01	SKIN	Staphylococcus aureus subsp. aureus	[u'RIBOSOMAL']	[u'CLASS_I_LANTIPEPTIDE']	4	105_["Lanthionine containing peptide","HYICIN M51"]	0.952381	O=C(N)CC5NC(=O)C(NC(=O)C(NC(=O)CNC(=O)C(=CC)NC(=O)C(NC(=O)C(NC(=O)C3NC(=O)CNC(=O)C4N(C(=O)C(NC(=O)C1NC(=O)C(NC(=O)C(=C)NC(=O)C(NC(=O)C(NC(=O)C(=CC)NC(=O)C(N)C(C)CC)CSC1)Cc2ccccc2)CC(C)C)C(C)SC3)CCC4)C)CCCCN)CSCC6NC(=O)C(NC(=O)C(NC5(=O))CSC=CNC6(=O))Cc7ccc(O)cc7)Cc8ccccc8
LFUZ01	SKIN	Staphylococcus aureus subsp. aureus	[u'RIBOSOMAL']	[u'CLASS_I_LANTIPEPTIDE']	4	105_["Lanthionine containing peptide","HYICIN M51"]	0.952381	O=C(N)CC5NC(=O)C(NC(=O)C(NC(=O)CNC(=O)C(=CC)NC(=O)C(NC(=O)C(NC(=O)C3NC(=O)CNC(=O)C4N(C(=O)C(NC(=O)C1NC(=O)C(NC(=O)C(=C)NC(=O)C(NC(=O)C(NC(=O)C(=CC)NC(=O)C(N)C(C)CC)CSC1)Cc2ccccc2)CC(C)C)C(C)SC3)CCC4)C)CCCCN)CSCC6NC(=O)C(NC(=O)C(NC5(=O))CSC=CNC6(=O))Cc7ccc(O)cc7)Cc8ccccc8
JGRD01	RESPIRATORY	Staphylococcus aureus DAR1067	[u'RIBOSOMAL']	[u'BACTERIAL_HEAD_TO_TAIL_CYCLIZED']	3	595_Syanodin I	0.590909	CC(C[C@@H](C(N[C@H](C(NCC(O)=O)=O)C)=O)NC(CNC([C@@H](NC(CNC([C@@H](NC([C@@H]1CCCN1C([C@@H](NC([C@@H]2CC(NCC(N[C@H](C(N[C@H](C(NCC(NCC(N[C@H](C(N[C@H](C(N2)=O)C(C)C)=O)[C@H](O)C)=O)=O)=O)CO)=O)CC(C)C)=O)=O)=O)C)=O)=O)C)=O)=O)CCC(N)=O)=O)=O)C
ALIF01	ORAL	Streptococcus salivarius K12	[u'RIBOSOMAL']	[u'CLASS_II_LANTIPEPTIDE']	3	216_SALIVARICIN-B-4	1	NCC(NCC(NCC(N[C@H](C(N[C@@H]([C@H](CC)C)C(N[C@H](C(N[C@H](C(N[C@@H]([C@H](CC)C)C(N[C@H](C(N[C@@H](CC1=CN=CN1)C(N[C@H](C(N[C@@H](CS2)C(N[C@H](C(N[C@@H](CCSC)C(N[C@H](C(N[C@H](C(N[C@@H](CC3=CNC4=C3C=CC=C4)C(N[C@H](C(N[C@@H](CC5=CC=CC=C5)C(N[C@H](C(N[C@@H](CC6=CC=CC=C6)C(N[C@H]7[C@@H](C)O)=O)=O)CC(C)C)=O)=O)CCC(N)=O)=O)=O)CSCC(C(N[C@H](C(O)=O)CO)=O)NC8=O)=O)CC(N)=O)=O)=O)CCCNC(N)=N)=O)=O)CCC(O)=O)=O…
ALIF01	ORAL	Streptococcus salivarius K12	[u'RIBOSOMAL']	[u'CLASS_II_LANTIPEPTIDE']	5	121_["SALIVARICIN A"]	0.9375	CCC(C(C(NC(C(NC(C(NC(C(NC(C(NC(C(NC(C(NC(C(N1CCCC1C(NC(C(NC(C(NC(C(NC(C(NC(C(NC2CS3)=O)C(C)C)=O)Cc4ccccc4)=O)C(C)C)=O)CSCC(C(O)=O)NC2=O)=O)CC(N)=O)=O)=O)CS5)=O)CC(O)=O)=O)CC(O)=O)=O)C3C)=O)C(CC)C)=O)C5C)=O)C)=O)NC(C(NC(CNC(C(NC(CNC(C(NC(C(CCCCN)N)=O)CCCNC(N)=N)=O)=O)CO)=O)=O)CC6=CNc7c6cccc7)=O)C
AGLG01	ORAL	Streptococcus mutans TCI-191	[u'RIBOSOMAL']	[u'CLASS_II_BACTERIOCIN']	2	69_Antimicrobial protein BL-A60	0.545455		MLVDILTIKKGGIHMNTKMMEQFETMDAETLSHVTGGGLYDGANGYAYRDSQGHWAYKVTKTPAQALTDVVVNSWASGAASFAAYA
AHVY01	NOSE	Staphylococcus aureus subsp. aureus CIGC128	[u'RIBOSOMAL']	[u'BACTERIAL_HEAD_TO_TAIL_CYCLIZED']	2	595_Syanodin I	0.590909	CC(C[C@@H](C(N[C@H](C(NCC(O)=O)=O)C)=O)NC(CNC([C@@H](NC(CNC([C@@H](NC([C@@H]1CCCN1C([C@@H](NC([C@@H]2CC(NCC(N[C@H](C(N[C@H](C(NCC(NCC(N[C@H](C(N[C@H](C(N2)=O)C(C)C)=O)[C@H](O)C)=O)=O)=O)CO)=O)CC(C)C)=O)=O)=O)C)=O)=O)C)=O)=O)CCC(N)=O)=O)=O)C
AHVY01	NOSE	Staphylococcus aureus subsp. aureus CIGC128	[u'RIBOSOMAL']	[u'CLASS_I_LANTIPEPTIDE']	4	105_["Lanthionine containing peptide","HYICIN M51"]	0.952381	O=C(N)CC5NC(=O)C(NC(=O)C(NC(=O)CNC(=O)C(=CC)NC(=O)C(NC(=O)C(NC(=O)C3NC(=O)CNC(=O)C4N(C(=O)C(NC(=O)C1NC(=O)C(NC(=O)C(=C)NC(=O)C(NC(=O)C(NC(=O)C(=CC)NC(=O)C(N)C(C)CC)CSC1)Cc2ccccc2)CC(C)C)C(C)SC3)CCC4)C)CCCCN)CSCC6NC(=O)C(NC(=O)C(NC5(=O))CSC=CNC6(=O))Cc7ccc(O)cc7)Cc8ccccc8
CAUJ01	ORAL	Streptococcus oralis subsp. dentisani 7746	[u'RIBOSOMAL']	[u'CLASS_II_BACTERIOCIN']	2	6_Bacteriocin amylovorin-L	0.54		MNTKMMEQFEIMDTDMLAKVEGGFGGWGDMIAGLLGGLAPSPTLDQLNGKWPIIHFSKPCGPYGIGGTPNSCNGI
LRHF01	SKIN	Streptococcus pyogenes	[u'RIBOSOMAL']	[u'LINEAR_AZOLE_CONTAINING_PEPTIDE']	2	600_["PLANTAZOLICIN B"]	0.789474	O=C(O)C(N=C(O)C1N=C(OC1(C))c2nc(oc2)c3nc(oc3)c4nc(oc4)c5nc(oc5)C(N=C(O)C(N=C(O)c6nc(oc6C)c7nc(oc7C)c%10nc(c8nc(oc8C)c9nc(C(N)CCCNC(=N)N)sc9)sc%10)C(C)CC)C(C)CC)Cc%11ccccc%11
LRHF01	SKIN	Streptococcus pyogenes	[u'RIBOSOMAL']	[u'CLASS_I_LANTIPEPTIDE']	3	124_["STREPTIN"]	1	CC(CC1NC(C(NC(C(NC(C(NC(CNC(C(C(C)C)N)=O)=O)CSCC(C(NC(C(N2CCCC2C(NCC(NC(C(NC(C(NC(C(NC(C(NC(C(NC3C(C)C)=O)CC(C)C)=O)CCCCN)=O)CC4=CNc5c4cccc5)=O)CS6)=O)CSCC(C(NC(C(N/C(C(N/C(C(N/C(C(NC(C(NC(C(O)=O)CCCCN)=O)C(C)C)=O)=C/C)=O)=C/C)=O)=C/C)=O)Cc7ccccc7)=O)NC3=O)=O)=O)=O)C6C)=O)NC1=O)=O)CCCNC(N)=N)=O)Cc8ccc(O)cc8)=O)C
LRHF01	SKIN	Streptococcus pyogenes	[u'RIBOSOMAL']	[u'CLASS_II_LANTIPEPTIDE']	5	121_["SALIVARICIN A"]	0.9375	CCC(C(C(NC(C(NC(C(NC(C(NC(C(NC(C(NC(C(NC(C(N1CCCC1C(NC(C(NC(C(NC(C(NC(C(NC(C(NC2CS3)=O)C(C)C)=O)Cc4ccccc4)=O)C(C)C)=O)CSCC(C(O)=O)NC2=O)=O)CC(N)=O)=O)=O)CS5)=O)CC(O)=O)=O)CC(O)=O)=O)C3C)=O)C(CC)C)=O)C5C)=O)C)=O)NC(C(NC(CNC(C(NC(CNC(C(NC(C(CCCCN)N)=O)CCCNC(N)=N)=O)=O)CO)=O)=O)CC6=CNc7c6cccc7)=O)C
LNOV01	STOOL	Enterococcus faecium	[u'RIBOSOMAL']	[u'CLASS_II_BACTERIOCIN']	1	40_Enterocin A	1		MKHLKILSIKETQLIYGGTTHSGKYYGNGVYCTKNKCTVDWAKATTCIAGMSIGGFLGGAIPGKC
LNOV01	STOOL	Enterococcus faecium	[u'RIBOSOMAL']	[u'CLASS_II_BACTERIOCIN']	2	16_Bacteriocin T8	1		MKKKVLKHCVILGILGTCLAGIGTGIKVDAATYYGNGLYCNKEKCWVDWNQAKGEIGKIIVNGWVNHGPWAPRR
CDVX01	CSF	Streptococcus suis	[u'RIBOSOMAL']	[u'CLASS_II_LANTIPEPTIDE']	2	88_["A-3802-VI-7"]	0.678571	O=C(O)CCC4NC(=O)C(NC(=O)C6NC(=O)C(NC(=O)C(NC(=O)C1NC(=O)C(NC(=O)C(NC(=O)CNC(=O)C(NC(=O)C(NC(=O)C)CSC1)CO)Cc3c[nH]c2ccccc23)C(C)C)C(C)SCC(NC4(=O))C(=O)NCC(=O)NC5C(=O)NC(C(=O)NC(C(=O)NC(C(=O)NC(C(=O)NC(C(=O)OC)CS(=O)C5(C))C)CSC6(C))C(C)CC)C(C)C)CC(C)C)C(C)CC
AGKQ01	ORAL	Streptococcus mutans TCI-148	[u'RIBOSOMAL']	[u'CLASS_II_BACTERIOCIN']	2	69_Antimicrobial protein BL-A60	0.545455		MLVDILTIKKGGIHMNTRMMEQFETMDAETLSHVTGGGLYDGANGYAYRDSQGHWAYKVTKTPAQALTDVVVNSWASGAASFAAYA
LUXJ01	STOOL	Lactobacillus plantarum	[u'RIBOSOMAL']	[u'CLASS_II_LANTIPEPTIDE']	1	198_Plantaricin C	1	N[C@H](C(N[C@H](C(N[C@H](C(N[C@H](C(N[C@H](C(N[C@H](C(N[C@H](C(N[C@H](C(NCC(N[C@@H](CC(O)=O)C(N[C@@H]([C@H](CC)C)C(N[C@@H](CS1)C(N[C@H](C(N[C@H](C(N[C@H](C(NC(C(N[C@H](C(N[C@@H](CS2)C(N[C@@H](CC(O)=O)C(N[C@@H](CC3=CN=CN3)C(N[C@H](C(N[C@@H](C)C(N[C@H](C(N[C@@H](CC4=CNC5=C4C=CC=C5)C(N[C@H](C(N[C@H]6CS7)=O)C(C)C)=O)=O)C7C)=O)=O)CC(C)C)=O)=O)=O)=O)CCC(O)=O)=O)=C)=O)C1C)=O)CC(C)C)=O)C2C)=O)=O)=O)=O)=O…
JANM01	RESPIRATORY	Staphylococcus aureus LCT-SAO	[u'RIBOSOMAL']	[u'CLASS_I_LANTIPEPTIDE']	4	105_["Lanthionine containing peptide","HYICIN M51"]	0.952381	O=C(N)CC5NC(=O)C(NC(=O)C(NC(=O)CNC(=O)C(=CC)NC(=O)C(NC(=O)C(NC(=O)C3NC(=O)CNC(=O)C4N(C(=O)C(NC(=O)C1NC(=O)C(NC(=O)C(=C)NC(=O)C(NC(=O)C(NC(=O)C(=CC)NC(=O)C(N)C(C)CC)CSC1)Cc2ccccc2)CC(C)C)C(C)SC3)CCC4)C)CCCCN)CSCC6NC(=O)C(NC(=O)C(NC5(=O))CSC=CNC6(=O))Cc7ccc(O)cc7)Cc8ccccc8
LTJY01	VAGINA	Enterococcus sp. HMSC077E04	[u'RIBOSOMAL']	[u'CLASS_II_BACTERIOCIN']	1	40_Enterocin A	1		MKHLKILSIKETQLIYGGTTHSGKYYGNGVYCTKNKCTVDWAKATTCIAGMSIGGFLGGAIPGKC
ALZA01	ORAL	Streptococcus mutans B06Sm2	[u'RIBOSOMAL']	[u'CLASS_II_LANTIPEPTIDE']	6	129_["streptococcin A-M49"]	0.804348	CCC(C(C(NC(C(NC(C(NC(C(NC(C(NC(C(NC(C(NC(C(NC1C(NC(C(NC(C(NC(C(NC(C(NC(C(N/C2=C\C)=O)C)=O)CC(C)C)=O)Cc3ccccc3)=O)C)=O)CC4=CNc5c4cccc5)=O)=O)CC(N)=O)=O)CC(C)C)=O)Cc6nc[nH]c6)=O)CS7)=O)CCC(O)=O)=O)Cc8nc[nH]c8)=O)CSCC(C(NC(C(NC(C(O)=O)=C)=O)CSC1C)=O)NC2=O)=O)NC(C(C7C)NC(C(NC(C(NC(C(C(C)C)NC(CNC(C(NC(C(NC(CN)=O)CCCCN)=O)CC(N)=O)=O)=O)=O)Cc9ccccc9)=O)CCCCN)=O)=O)C
LHAG01	CSF	Streptococcus pneumoniae	[u'RIBOSOMAL']	[u'CLASS_II_BACTERIOCIN']	3	6_Bacteriocin amylovorin-L	0.58		MNTKMMEQFHEMDIAMLSSIEGGKNNWQTNVFEGGSAAFGGWGLGTAICAASGVGAPFMGACGYIGAKFGVALWAGVTGATGGF
LTMJ01	SKIN	Staphylococcus sp. HMSC57B03	[u'RIBOSOMAL']	[u'CLASS_I_LANTIPEPTIDE']	4	105_["Lanthionine containing peptide","HYICIN M51"]	0.952381	O=C(N)CC5NC(=O)C(NC(=O)C(NC(=O)CNC(=O)C(=CC)NC(=O)C(NC(=O)C(NC(=O)C3NC(=O)CNC(=O)C4N(C(=O)C(NC(=O)C1NC(=O)C(NC(=O)C(=C)NC(=O)C(NC(=O)C(NC(=O)C(=CC)NC(=O)C(N)C(C)CC)CSC1)Cc2ccccc2)CC(C)C)C(C)SC3)CCC4)C)CCCCN)CSCC6NC(=O)C(NC(=O)C(NC5(=O))CSC=CNC6(=O))Cc7ccc(O)cc7)Cc8ccccc8
AGLN01	ORAL	Streptococcus mutans TCI-218	[u'RIBOSOMAL']	[u'CLASS_II_BACTERIOCIN']	3	69_Antimicrobial protein BL-A60	0.545455		MLVDILTIKKGGIHMNTRMMEQFETMDAETLSHVTGGGLYDGANGYAYRDSQGHWAYKVTKTPAQALTDVVVNSWASGAASFAAYA
CEBQ01	CSF	Streptococcus suis	[u'RIBOSOMAL']	[u'CLASS_II_LANTIPEPTIDE']	2	88_["A-3802-VI-7"]	0.678571	O=C(O)CCC4NC(=O)C(NC(=O)C6NC(=O)C(NC(=O)C(NC(=O)C1NC(=O)C(NC(=O)C(NC(=O)CNC(=O)C(NC(=O)C(NC(=O)C)CSC1)CO)Cc3c[nH]c2ccccc23)C(C)C)C(C)SCC(NC4(=O))C(=O)NCC(=O)NC5C(=O)NC(C(=O)NC(C(=O)NC(C(=O)NC(C(=O)NC(C(=O)OC)CS(=O)C5(C))C)CSC6(C))C(C)CC)C(C)C)CC(C)C)C(C)CC
LNLD01	STOOL	Enterococcus faecium	[u'RIBOSOMAL']	[u'CLASS_II_BACTERIOCIN']	2	16_Bacteriocin T8	1		MKKKVLKHCVILGILGTCLAGIGTGIKVDAATYYGNGLYCNKEKCWVDWNQAKGEIGKIIVNGWVNHGPWAPRR
LNLD01	STOOL	Enterococcus faecium	[u'RIBOSOMAL']	[u'CLASS_II_BACTERIOCIN']	4	40_Enterocin A	1		MKHLKILSIKETQLIYGGTTHSGKYYGNGVYCTKNKCTVDWAKATTCIAGMSIGGFLGGAIPGKC
AGLK01	ORAL	Streptococcus mutans TCI-204	[u'RIBOSOMAL']	[u'CLASS_II_BACTERIOCIN']	3	69_Antimicrobial protein BL-A60	0.545455		MNTKMMKQFETMDAETLSHVTGGGLYDGANGYAYRDSQGHWAYKVTKTPAQALTDVVVNSWASGAASFAAYA
JGRE01	RESPIRATORY	Staphylococcus aureus DAR1082	[u'RIBOSOMAL']	[u'BACTERIAL_HEAD_TO_TAIL_CYCLIZED']	2	569_["XANTHOMONIN II"]	0.578947	CC(C)C[C@@H](C(N[C@@H](C)C(NCC(N[C@H](C(N[C@H](C(N[C@@H](CCSC)C(NCC(NCC(N[C@@H]([C@H](CC)C)C(N[C@H](C(N[C@H](C(O)=O)[C@@H](C)O)=O)[C@@H](C)O)=O)=O)=O)=O)=O)CCC(O)=O)=O)CC1)=O)=O)=O)NC([C@@H]2CCCN2C(CNC(CNC1=O)=O)=O)=O
LNPA01	STOOL	Enterococcus faecium	[u'RIBOSOMAL']	[u'CLASS_II_BACTERIOCIN']	2	40_Enterocin A	1		MKHLKILSIKETQLIYGGTTHSGKYYGNGVYCTKNKCTVDWAKATTCIAGMSIGGFLGGAIPGKC
LNPA01	STOOL	Enterococcus faecium	[u'RIBOSOMAL']	[u'CLASS_II_BACTERIOCIN']	3	16_Bacteriocin T8	1		MKKKVLKHCVILGILGTCLAGIGTGIKVDAATYYGNGLYCNKEKCWVDWNQAKGEIGKIIVNGWVNHGPWAPRR
AHSY01	ORAL	Streptococcus mutans 14D	[u'RIBOSOMAL']	[u'CLASS_II_LANTIPEPTIDE']	5	127_["VARIACIN"]	0.688889	CCC(C(C(NC(C(NC(C(NC(C(NC(C(NC(C(NC(C(NC(C(NC(C(NC(C(NC(C(NC(C(NC(C(NC(C(N/C1=C/C)=O)Cc2ccccc2)=O)C(C)C)=O)Cc3ccccc3)=O)CCC(N)=O)=O)Cc4ccccc4)=O)CSCC(C(NC(C(O)=O)=C)=O)NC5=O)=O)CC(N)=O)=O)CCSC)=O)Cc6nc[nH]c6)=O)CS7)=O)CCC(O)=O)=O)Cc8nc[nH]c8)=O)CSCC5NC1=O)=O)NC(C(C7C)NC(C9CCCN9C(C(C(CC)C)NC(C(C(C)C)NC(CNC(C(NC(CN)=O)=C)=O)=O)=O)=O)=O)=O)C
LRGP01	SKIN	Streptococcus pyogenes	[u'RIBOSOMAL']	[u'CLASS_II_LANTIPEPTIDE']	2	121_["SALIVARICIN A"]	0.9375	CCC(C(C(NC(C(NC(C(NC(C(NC(C(NC(C(NC(C(NC(C(N1CCCC1C(NC(C(NC(C(NC(C(NC(C(NC(C(NC2CS3)=O)C(C)C)=O)Cc4ccccc4)=O)C(C)C)=O)CSCC(C(O)=O)NC2=O)=O)CC(N)=O)=O)=O)CS5)=O)CC(O)=O)=O)CC(O)=O)=O)C3C)=O)C(CC)C)=O)C5C)=O)C)=O)NC(C(NC(CNC(C(NC(CNC(C(NC(C(CCCCN)N)=O)CCCNC(N)=N)=O)=O)CO)=O)=O)CC6=CNc7c6cccc7)=O)C
LRGP01	SKIN	Streptococcus pyogenes	[u'RIBOSOMAL']	[u'LINEAR_AZOLE_CONTAINING_PEPTIDE']	4	600_["PLANTAZOLICIN B"]	0.789474	O=C(O)C(N=C(O)C1N=C(OC1(C))c2nc(oc2)c3nc(oc3)c4nc(oc4)c5nc(oc5)C(N=C(O)C(N=C(O)c6nc(oc6C)c7nc(oc7C)c%10nc(c8nc(oc8C)c9nc(C(N)CCCNC(=N)N)sc9)sc%10)C(C)CC)C(C)CC)Cc%11ccccc%11
LAZY01	URINE	Chryseobacterium indologenes	[u'RIBOSOMAL']	[u'CLASS_II_LANTIPEPTIDE']	2	645_[Mechercharstatin_B,MECHERCHARMYCIN_B]	0.571429	O=C(OC)c1nc(co1)c4nc(C(O)=NC(C(O)=NC(C(O)=NC(=C)c2nc(co2)c3nc(co3)C(=N)O)C(C)C)C(C)CC)c(o4)c5ccccc5
LAZY01	URINE	Chryseobacterium indologenes	[u'RIBOSOMAL']	[u'MICROVIRIDIN']	3	539_["MICROVIRIDIN E"]	0.666667	[H]C2(OC(=O)CC4([H])(NC(=O)C([H])(NC(=O)C8([H])(N(C(=O)C([H])(NC(=O)C([H])(NC(=O)C([H])(NC(=O)C2([H])(NC(=O)C([H])(NC(=O)C([H])(NC(=O)C)Cc1ccccc1)CO))Cc3ccc(O)cc3)CCCCNC(=O)CC([H])(NC(=O)C(NC(=O)C([H])(NC4(=O))Cc5ccccc5)CCC(=O)OC)C(=O)NC([H])(C(=O)O)Cc6ccc(O)cc6)Cc7ccc(O)cc7)CCC8))CO))(C)
JSIQ01	URINE	Escherichia coli	[u'RIBOSOMAL']	[u'LINEAR_AZOLE_CONTAINING_PEPTIDE']	3	601_["MccB17","MICROCIN B17","MICROCIN 17W"]	0.622642	O=C(O)C(N=C(O)C(N=C(O)C(N=C(O)CN=C(O)c1nc(oc1)CN=C(O)CN=C(O)c2nc(oc2)CN=C(O)CN=C(O)C(N=C(O)CN=C(O)CN=C(O)c3nc(oc3)c8nc(CN=C(O)C(N=C(O)C(N=C(O)c7nc(CN=C(O)CN=C(O)c6nc(CN=C(O)CN=C(O)CN=C(O)C(N=C(O)CN=C(O)CN=C(O)c5nc(c4nc(oc4)CN=C(O)CN=C(O)CN=C(O)CN=C(O)CN=C(O)CN=C(O)CN=C(O)CN=C(O)CN=C(O)CN=C(O)C(N=C(O)CN=C(O)C(N)C(C)C)C(C)CC)sc5)CCC(=N)O)sc6)sc7)CO)CC(=N)O)sc8)CC(=N)O)CO)Cc9cnc[nH]9)C(C)CC
CVUF01	SKIN	Staphylococcus capitis	[u'RIBOSOMAL']	[u'CLASS_I_LANTIPEPTIDE']	1	106_["Lanthionine containing peptide","HYICIN M51"]	0.666667	O=C(N)CC5NC(=O)C(NC(=O)C(NC(=O)CNC(=O)C(=CC)NC(=O)C(NC(=O)C(NC(=O)C3NC(=O)CNC(=O)C4N(C(=O)C(NC(=O)C1NC(=O)C(NC(=O)C(NC(=O)C(=C)NC(=O)C(NC(=O)C(=CC)NC(=O)C(N)C(C)CC)CSC1)Cc2ccccc2)CC(C)C)C(C)SC3)CCC4)C)CCCCN)CSCC6NC(=O)C(NC(=O)C(NC5(=O))CSC=CNC6(=O))Cc7ccc(O)cc7)Cc8ccccc8
ALZC01	ORAL	Streptococcus mutans B88SM-A	[u'RIBOSOMAL']	[u'CLASS_I_LANTIPEPTIDE']	2	122_[MUTACIN B-NY266"]	1	C/C=C(C(NCC(NC(C(NC(C(NC(C(NC(C(NC1Cc2ccc(O)cc2)=O)CS/C=C/NC3=O)=O)CC(N)=O)=O)Cc4ccccc4)=O)CSCC3NC1=O)=O)=O)\NC(C(NC(C(NC(C(NC(CNC(C5CCCN56)=O)=O)CSC(C)C(NC(C(NC(C(NC(C(NC(C(N7)CC8=CNc9c8cccc9)=O)=C)=O)Cc%10ccccc%10)=O)CSCC(NC(C(NC(C(Cc%11ccccc%11)N)=O)CCCCN)=O)C7=O)=O)C6=O)=O)C)=O)CCCCN)=O
ALZC01	ORAL	Streptococcus mutans B88SM-A	[u'RIBOSOMAL']	[u'CLASS_II_BACTERIOCIN']	5	69_Antimicrobial protein BL-A60	0.545455		MLVDILTIKKGGIHMNTRMMEQFETMDAETLSHVTGGGLYDGANGYAYRDSQGHWAYKVTKTPAQALTDVVVNSWASGAASFAAYA
CDUH01	CSF	Streptococcus suis	[u'RIBOSOMAL']	[u'CLASS_II_LANTIPEPTIDE']	1	88_["A-3802-VI-7"]	0.678571	O=C(O)CCC4NC(=O)C(NC(=O)C6NC(=O)C(NC(=O)C(NC(=O)C1NC(=O)C(NC(=O)C(NC(=O)CNC(=O)C(NC(=O)C(NC(=O)C)CSC1)CO)Cc3c[nH]c2ccccc23)C(C)C)C(C)SCC(NC4(=O))C(=O)NCC(=O)NC5C(=O)NC(C(=O)NC(C(=O)NC(C(=O)NC(C(=O)NC(C(=O)OC)CS(=O)C5(C))C)CSC6(C))C(C)CC)C(C)C)CC(C)C)C(C)CC
LVYT01	ORAL	Streptococcus pyogenes	[u'RIBOSOMAL']	[u'CLASS_I_LANTIPEPTIDE']	1	124_["STREPTIN"]	1	CC(CC1NC(C(NC(C(NC(C(NC(CNC(C(C(C)C)N)=O)=O)CSCC(C(NC(C(N2CCCC2C(NCC(NC(C(NC(C(NC(C(NC(C(NC(C(NC3C(C)C)=O)CC(C)C)=O)CCCCN)=O)CC4=CNc5c4cccc5)=O)CS6)=O)CSCC(C(NC(C(N/C(C(N/C(C(N/C(C(NC(C(NC(C(O)=O)CCCCN)=O)C(C)C)=O)=C/C)=O)=C/C)=O)=C/C)=O)Cc7ccccc7)=O)NC3=O)=O)=O)=O)C6C)=O)NC1=O)=O)CCCNC(N)=N)=O)Cc8ccc(O)cc8)=O)C
LVYT01	ORAL	Streptococcus pyogenes	[u'RIBOSOMAL']	[u'LINEAR_AZOLE_CONTAINING_PEPTIDE']	2	600_["PLANTAZOLICIN B"]	0.789474	O=C(O)C(N=C(O)C1N=C(OC1(C))c2nc(oc2)c3nc(oc3)c4nc(oc4)c5nc(oc5)C(N=C(O)C(N=C(O)c6nc(oc6C)c7nc(oc7C)c%10nc(c8nc(oc8C)c9nc(C(N)CCCNC(=N)N)sc9)sc%10)C(C)CC)C(C)CC)Cc%11ccccc%11
LVYT01	ORAL	Streptococcus pyogenes	[u'RIBOSOMAL']	[u'CLASS_II_LANTIPEPTIDE']	4	121_["SALIVARICIN A"]	0.9375	CCC(C(C(NC(C(NC(C(NC(C(NC(C(NC(C(NC(C(NC(C(N1CCCC1C(NC(C(NC(C(NC(C(NC(C(NC(C(NC2CS3)=O)C(C)C)=O)Cc4ccccc4)=O)C(C)C)=O)CSCC(C(O)=O)NC2=O)=O)CC(N)=O)=O)=O)CS5)=O)CC(O)=O)=O)CC(O)=O)=O)C3C)=O)C(CC)C)=O)C5C)=O)C)=O)NC(C(NC(CNC(C(NC(CNC(C(NC(C(CCCCN)N)=O)CCCNC(N)=N)=O)=O)CO)=O)=O)CC6=CNc7c6cccc7)=O)C
AHRT01	ORAL	Streptococcus mutans 11VS1	[u'RIBOSOMAL']	[u'CLASS_II_LANTIPEPTIDE']	5	127_["VARIACIN"]	0.688889	CCC(C(C(NC(C(NC(C(NC(C(NC(C(NC(C(NC(C(NC(C(NC(C(NC(C(NC(C(NC(C(NC(C(NC(C(N/C1=C/C)=O)Cc2ccccc2)=O)C(C)C)=O)Cc3ccccc3)=O)CCC(N)=O)=O)Cc4ccccc4)=O)CSCC(C(NC(C(O)=O)=C)=O)NC5=O)=O)CC(N)=O)=O)CCSC)=O)Cc6nc[nH]c6)=O)CS7)=O)CCC(O)=O)=O)Cc8nc[nH]c8)=O)CSCC5NC1=O)=O)NC(C(C7C)NC(C9CCCN9C(C(C(CC)C)NC(C(C(C)C)NC(CNC(C(NC(CN)=O)=C)=O)=O)=O)=O)=O)=O)C
LWGR01	RESPIRATORY	Nocardia terpenica	[u'RIBOSOMAL']	[u'LASSO_PEPTIDE', u'LINEAR_AZOLE_CONTAINING_PEPTIDE']	11	373_["10381-w","PROMOTHIOCIN-A","SF-2741-A"]	0.85	O=C(N)C(=C)NC(=O)c3nc4c1nc(oc1C)C(NC(=O)c6nc(C(NC(=O)c2nc(oc2C)CNC(=O)C(NC(=O)c5nc(c4(cc3))sc5)C(C)C)C)sc6)C
LWGR01	RESPIRATORY	Nocardia terpenica	[u'RIBOSOMAL']	[u'LASSO_PEPTIDE']	16	593_Rhodanodin	0.545455	CC[C@@H]([C@@H]1NC([C@@H]2CCCN2C([C@@H](NC([C@H](C(C)C)NC(CNC(CC[C@@H](C(N[C@H](C(N[C@H](C(NCC(N[C@H](C(N[C@H](C(N[C@H](C(N[C@H](C(N3CCC[C@H]3C(NCC(O)=O)=O)=O)[C@H](O)C)=O)C)=O)C)=O)CC4=CNC=N4)=O)=O)CCSC)=O)CC5=CC=CC=C5)=O)NC([C@@H](NC(CNC1=O)=O)CC(N)=O)=O)=O)=O)=O)CC(C)C)=O)=O)C
CDVF01	CSF	Streptococcus suis	[u'RIBOSOMAL']	[u'CLASS_II_LANTIPEPTIDE']	1	88_["A-3802-VI-7"]	0.678571	O=C(O)CCC4NC(=O)C(NC(=O)C6NC(=O)C(NC(=O)C(NC(=O)C1NC(=O)C(NC(=O)C(NC(=O)CNC(=O)C(NC(=O)C(NC(=O)C)CSC1)CO)Cc3c[nH]c2ccccc23)C(C)C)C(C)SCC(NC4(=O))C(=O)NCC(=O)NC5C(=O)NC(C(=O)NC(C(=O)NC(C(=O)NC(C(=O)NC(C(=O)OC)CS(=O)C5(C))C)CSC6(C))C(C)CC)C(C)C)CC(C)C)C(C)CC
AGLZ01	ORAL	Streptococcus mutans TCI-244	[u'RIBOSOMAL']	[u'CLASS_II_BACTERIOCIN']	2	69_Antimicrobial protein BL-A60	0.545455		MLVDILTIKKGGIHMNTRMMEQFETMNAETLSHVTGGGLYDGANGYAYRDSQGHWAYKVTKTPAQALTDVVVNSWASGAASFAAYA
JNRI01	STOOL	Escherichia coli 2-474-04_S3_C2	[u'RIBOSOMAL']	[u'LINEAR_AZOLE_CONTAINING_PEPTIDE']	5	601_["MccB17","MICROCIN B17","MICROCIN 17W"]	0.924528	O=C(O)C(N=C(O)C(N=C(O)C(N=C(O)CN=C(O)c1nc(oc1)CN=C(O)CN=C(O)c2nc(oc2)CN=C(O)CN=C(O)C(N=C(O)CN=C(O)CN=C(O)c3nc(oc3)c8nc(CN=C(O)C(N=C(O)C(N=C(O)c7nc(CN=C(O)CN=C(O)c6nc(CN=C(O)CN=C(O)CN=C(O)C(N=C(O)CN=C(O)CN=C(O)c5nc(c4nc(oc4)CN=C(O)CN=C(O)CN=C(O)CN=C(O)CN=C(O)CN=C(O)CN=C(O)CN=C(O)CN=C(O)CN=C(O)C(N=C(O)CN=C(O)C(N)C(C)C)C(C)CC)sc5)CCC(=N)O)sc6)sc7)CO)CC(=N)O)sc8)CC(=N)O)CO)Cc9cnc[nH]9)C(C)CC
AJRB03	STOOL	Enterococcus sp. GMD3E	[u'RIBOSOMAL']	[u'CLASS_II_BACTERIOCIN']	1	40_Enterocin A	1		MKHLKILSIKETQLIYGGTTHSGKYYGNGVYCTKNKCTVDWAKATTCIAGMSIGGFLGGAIPGKC
AJRB03	STOOL	Enterococcus sp. GMD3E	[u'RIBOSOMAL']	[u'CLASS_II_BACTERIOCIN']	3	17_Enterocin B	1		MQNVKELSTKEMKQIIGGENDHRMPNELNRPNNLSKGGAKCGAAIAGGLFGIPKGPLAWAAGLANVYSKCN
AYPA01	ORAL	Streptococcus pyogenes SP1-LAU	[u'RIBOSOMAL']	[u'LINEAR_AZOLE_CONTAINING_PEPTIDE']	2	600_["PLANTAZOLICIN B"]	0.789474	O=C(O)C(N=C(O)C1N=C(OC1(C))c2nc(oc2)c3nc(oc3)c4nc(oc4)c5nc(oc5)C(N=C(O)C(N=C(O)c6nc(oc6C)c7nc(oc7C)c%10nc(c8nc(oc8C)c9nc(C(N)CCCNC(=N)N)sc9)sc%10)C(C)CC)C(C)CC)Cc%11ccccc%11
AYPA01	ORAL	Streptococcus pyogenes SP1-LAU	[u'RIBOSOMAL']	[u'CLASS_I_LANTIPEPTIDE']	3	124_["STREPTIN"]	1	CC(CC1NC(C(NC(C(NC(C(NC(CNC(C(C(C)C)N)=O)=O)CSCC(C(NC(C(N2CCCC2C(NCC(NC(C(NC(C(NC(C(NC(C(NC(C(NC3C(C)C)=O)CC(C)C)=O)CCCCN)=O)CC4=CNc5c4cccc5)=O)CS6)=O)CSCC(C(NC(C(N/C(C(N/C(C(N/C(C(NC(C(NC(C(O)=O)CCCCN)=O)C(C)C)=O)=C/C)=O)=C/C)=O)=C/C)=O)Cc7ccccc7)=O)NC3=O)=O)=O)=O)C6C)=O)NC1=O)=O)CCCNC(N)=N)=O)Cc8ccc(O)cc8)=O)C
AYPA01	ORAL	Streptococcus pyogenes SP1-LAU	[u'RIBOSOMAL']	[u'CLASS_II_LANTIPEPTIDE']	5	121_["SALIVARICIN A"]	0.9375	CCC(C(C(NC(C(NC(C(NC(C(NC(C(NC(C(NC(C(NC(C(N1CCCC1C(NC(C(NC(C(NC(C(NC(C(NC(C(NC2CS3)=O)C(C)C)=O)Cc4ccccc4)=O)C(C)C)=O)CSCC(C(O)=O)NC2=O)=O)CC(N)=O)=O)=O)CS5)=O)CC(O)=O)=O)CC(O)=O)=O)C3C)=O)C(CC)C)=O)C5C)=O)C)=O)NC(C(NC(CNC(C(NC(CNC(C(NC(C(CCCCN)N)=O)CCCNC(N)=N)=O)=O)CO)=O)=O)CC6=CNc7c6cccc7)=O)C
JFIC01	RESPIRATORY	Legionella pneumophila subsp. pneumophila	[u'RIBOSOMAL']	[u'LASSO_PEPTIDE']	5	276_["PRE-T","10381-T","PRE-10381-T"]	0.571429	O=C(N)c3nc4c1nc(oc1C)C(NC(=O)c6nc(C(NC(=O)c2nc(oc2C)CNC(=O)C(NC(=O)c5nc(c4(cc3))sc5)C(C)C)C)sc6)C
AUZC01	STOOL	Clostridium botulinum F 357	[u'RIBOSOMAL']	[u'LINEAR_AZOLE_CONTAINING_PEPTIDE']	3	603_clostridiolysin_S	0.9	NC(CS)C1=NC(C2=NC(C3=NC(C4=NC(C5=NC(C6=NC(C7=NC(C8=NC(C(NC(C9=NC(C(NC(C%10=NC(C(NC(C(NCC(NCC(NCC%11=NC(C(NC(C)C%12=NC(C%13=NC(C(NCC(NCC(NCC(NC(C)C(NC(C)C(NC(C)C(NCC(NC(C(NCC(NCC(NC(C(O)=O)CC(N)=O)=O)=O)=O)CCC(N)=O)=O)=O)=O)=O)=O)=O)=O)=O)=C(C)O%13)=CO%12)=O)=CO%11)=O)=O)=O)C(C)C)=O)=CO%10)C(C)C)=O)=CO9)C(C)C)=O)=CS8)=CS7)=CS6)=CS5)=CO4)=CS3)=CS2)=CS1
CEAY01	CSF	Streptococcus suis	[u'RIBOSOMAL']	[u'CLASS_II_LANTIPEPTIDE']	2	88_["A-3802-VI-7"]	0.678571	O=C(O)CCC4NC(=O)C(NC(=O)C6NC(=O)C(NC(=O)C(NC(=O)C1NC(=O)C(NC(=O)C(NC(=O)CNC(=O)C(NC(=O)C(NC(=O)C)CSC1)CO)Cc3c[nH]c2ccccc23)C(C)C)C(C)SCC(NC4(=O))C(=O)NCC(=O)NC5C(=O)NC(C(=O)NC(C(=O)NC(C(=O)NC(C(=O)NC(C(=O)OC)CS(=O)C5(C))C)CSC6(C))C(C)CC)C(C)C)CC(C)C)C(C)CC
AGKU01	ORAL	Streptococcus mutans TCI-153	[u'RIBOSOMAL']	[u'CLASS_II_BACTERIOCIN']	2	69_Antimicrobial protein BL-A60	0.545455		MNTRMMEQFETMDAETLSHVTGGGLYDGANGYAYRDSQGHWAYKVTKTPAQALTDVVVNSWASGAASFAAYA
AGLQ01	ORAL	Streptococcus mutans TCI-222	[u'RIBOSOMAL']	[u'CLASS_II_BACTERIOCIN']	3	69_Antimicrobial protein BL-A60	0.545455		MLVDILTIKKGGIHMNTRMMEQFETMDAETLSHVTGGGLYDGANGYAYRDSQGHWAYKVTKTPAQALTDVVVNSWASGAASFAAYA
JGQC01	RESPIRATORY	Staphylococcus aureus DAR3871	[u'RIBOSOMAL']	[u'BACTERIAL_HEAD_TO_TAIL_CYCLIZED']	3	595_Syanodin I	0.590909	CC(C[C@@H](C(N[C@H](C(NCC(O)=O)=O)C)=O)NC(CNC([C@@H](NC(CNC([C@@H](NC([C@@H]1CCCN1C([C@@H](NC([C@@H]2CC(NCC(N[C@H](C(N[C@H](C(NCC(NCC(N[C@H](C(N[C@H](C(N2)=O)C(C)C)=O)[C@H](O)C)=O)=O)=O)CO)=O)CC(C)C)=O)=O)=O)C)=O)=O)C)=O)=O)CCC(N)=O)=O)=O)C
CECH01	CSF	Streptococcus suis	[u'RIBOSOMAL']	[u'CLASS_II_LANTIPEPTIDE']	1	88_["A-3802-VI-7"]	0.678571	O=C(O)CCC4NC(=O)C(NC(=O)C6NC(=O)C(NC(=O)C(NC(=O)C1NC(=O)C(NC(=O)C(NC(=O)CNC(=O)C(NC(=O)C(NC(=O)C)CSC1)CO)Cc3c[nH]c2ccccc23)C(C)C)C(C)SCC(NC4(=O))C(=O)NCC(=O)NC5C(=O)NC(C(=O)NC(C(=O)NC(C(=O)NC(C(=O)NC(C(=O)OC)CS(=O)C5(C))C)CSC6(C))C(C)CC)C(C)C)CC(C)C)C(C)CC
JNMU01	STOOL	Escherichia coli 3-373-03_S1_C3	[u'RIBOSOMAL']	[u'LINEAR_AZOLE_CONTAINING_PEPTIDE']	4	601_["MccB17","MICROCIN B17","MICROCIN 17W"]	0.867925	O=C(O)C(N=C(O)C(N=C(O)C(N=C(O)CN=C(O)c1nc(oc1)CN=C(O)CN=C(O)c2nc(oc2)CN=C(O)CN=C(O)C(N=C(O)CN=C(O)CN=C(O)c3nc(oc3)c8nc(CN=C(O)C(N=C(O)C(N=C(O)c7nc(CN=C(O)CN=C(O)c6nc(CN=C(O)CN=C(O)CN=C(O)C(N=C(O)CN=C(O)CN=C(O)c5nc(c4nc(oc4)CN=C(O)CN=C(O)CN=C(O)CN=C(O)CN=C(O)CN=C(O)CN=C(O)CN=C(O)CN=C(O)CN=C(O)C(N=C(O)CN=C(O)C(N)C(C)C)C(C)CC)sc5)CCC(=N)O)sc6)sc7)CO)CC(=N)O)sc8)CC(=N)O)CO)Cc9cnc[nH]9)C(C)CC
LNLN01	STOOL	Enterococcus faecium	[u'RIBOSOMAL']	[u'CLASS_II_BACTERIOCIN']	2	16_Bacteriocin T8	1		MKKKVLKHCVILGILGTCLAGIGTGIKVDAATYYGNGLYCNKEKCWVDWNQAKGEIGKIIVNGWVNHGPWAPRR
JGQI01	FEET	Staphylococcus aureus DAR3897	[u'RIBOSOMAL']	[u'BACTERIAL_HEAD_TO_TAIL_CYCLIZED']	3	595_Syanodin I	0.590909	CC(C[C@@H](C(N[C@H](C(NCC(O)=O)=O)C)=O)NC(CNC([C@@H](NC(CNC([C@@H](NC([C@@H]1CCCN1C([C@@H](NC([C@@H]2CC(NCC(N[C@H](C(N[C@H](C(NCC(NCC(N[C@H](C(N[C@H](C(N2)=O)C(C)C)=O)[C@H](O)C)=O)=O)=O)CO)=O)CC(C)C)=O)=O)=O)C)=O)=O)C)=O)=O)CCC(N)=O)=O)=O)C
CDSR01	CSF	Streptococcus suis	[u'RIBOSOMAL']	[u'CLASS_II_LANTIPEPTIDE']	2	88_["A-3802-VI-7"]	0.678571	O=C(O)CCC4NC(=O)C(NC(=O)C6NC(=O)C(NC(=O)C(NC(=O)C1NC(=O)C(NC(=O)C(NC(=O)CNC(=O)C(NC(=O)C(NC(=O)C)CSC1)CO)Cc3c[nH]c2ccccc23)C(C)C)C(C)SCC(NC4(=O))C(=O)NCC(=O)NC5C(=O)NC(C(=O)NC(C(=O)NC(C(=O)NC(C(=O)NC(C(=O)OC)CS(=O)C5(C))C)CSC6(C))C(C)CC)C(C)C)CC(C)C)C(C)CC
LSNZ01	URINE	Escherichia coli	[u'RIBOSOMAL']	[u'LINEAR_AZOLE_CONTAINING_PEPTIDE']	3	601_["MccB17","MICROCIN B17","MICROCIN 17W"]	1	O=C(O)C(N=C(O)C(N=C(O)C(N=C(O)CN=C(O)c1nc(oc1)CN=C(O)CN=C(O)c2nc(oc2)CN=C(O)CN=C(O)C(N=C(O)CN=C(O)CN=C(O)c3nc(oc3)c8nc(CN=C(O)C(N=C(O)C(N=C(O)c7nc(CN=C(O)CN=C(O)c6nc(CN=C(O)CN=C(O)CN=C(O)C(N=C(O)CN=C(O)CN=C(O)c5nc(c4nc(oc4)CN=C(O)CN=C(O)CN=C(O)CN=C(O)CN=C(O)CN=C(O)CN=C(O)CN=C(O)CN=C(O)CN=C(O)C(N=C(O)CN=C(O)C(N)C(C)C)C(C)CC)sc5)CCC(=N)O)sc6)sc7)CO)CC(=N)O)sc8)CC(=N)O)CO)Cc9cnc[nH]9)C(C)CC
AHRQ01	ORAL	Streptococcus mutans 4VF1	[u'RIBOSOMAL']	[u'CLASS_II_BACTERIOCIN']	7	69_Antimicrobial protein BL-A60	0.545455		T*DFLTSTTGVNNYKSLTNDELSEVFGGDKQAADTFLSAVGGAASGFTYCASNGVWHPYILAGCAGVGAVGSVVFPH
AHRQ01	ORAL	Streptococcus mutans 4VF1	[u'RIBOSOMAL']	[u'CLASS_II_BACTERIOCIN']	9	69_Antimicrobial protein BL-A60	0.545455		MLVDILTIKKGGIHMNTRMMEQFETMDAETLSHVTGGGLYDGANGYAYRDSQGHWAYKVTKTPAQALTDVVVNSWASGAASFAAYA
LNLE01	STOOL	Enterococcus faecium	[u'RIBOSOMAL']	[u'CLASS_II_BACTERIOCIN']	2	16_Bacteriocin T8	1		MKKKVLKHCVILGILGTCLAGIGTGIKVDAATYYGNGLYCNKEKCWVDWNQAKGEIGKIIVNGWVNHGPWAPRR
LNLE01	STOOL	Enterococcus faecium	[u'RIBOSOMAL']	[u'CLASS_II_BACTERIOCIN']	4	40_Enterocin A	1		MHIKNTKTTFILSSEELKNIQGGSAVGVLGTTFSGATAGVKLCSAGGPYAIAACGVGGALLGAGFSMWTGA
LNLJ01	STOOL	Enterococcus faecium	[u'RIBOSOMAL']	[u'CLASS_II_BACTERIOCIN']	1	16_Bacteriocin T8	1		MKKKVLKHCVILGILGTCLAGIGTGIKVDAATYYGNGLYCNKEKCWVDWNQAKGEIGKIIVNGWVNHGPWAPRR
CDVR01	CSF	Streptococcus suis	[u'RIBOSOMAL']	[u'CLASS_II_LANTIPEPTIDE']	2	88_["A-3802-VI-7"]	0.678571	O=C(O)CCC4NC(=O)C(NC(=O)C6NC(=O)C(NC(=O)C(NC(=O)C1NC(=O)C(NC(=O)C(NC(=O)CNC(=O)C(NC(=O)C(NC(=O)C)CSC1)CO)Cc3c[nH]c2ccccc23)C(C)C)C(C)SCC(NC4(=O))C(=O)NCC(=O)NC5C(=O)NC(C(=O)NC(C(=O)NC(C(=O)NC(C(=O)NC(C(=O)OC)CS(=O)C5(C))C)CSC6(C))C(C)CC)C(C)C)CC(C)C)C(C)CC
CDTP01	CSF	Streptococcus suis	[u'RIBOSOMAL']	[u'CLASS_II_LANTIPEPTIDE']	2	88_["A-3802-VI-7"]	0.678571	O=C(O)CCC4NC(=O)C(NC(=O)C6NC(=O)C(NC(=O)C(NC(=O)C1NC(=O)C(NC(=O)C(NC(=O)CNC(=O)C(NC(=O)C(NC(=O)C)CSC1)CO)Cc3c[nH]c2ccccc23)C(C)C)C(C)SCC(NC4(=O))C(=O)NCC(=O)NC5C(=O)NC(C(=O)NC(C(=O)NC(C(=O)NC(C(=O)NC(C(=O)OC)CS(=O)C5(C))C)CSC6(C))C(C)CC)C(C)C)CC(C)C)C(C)CC
AGLA01	ORAL	Streptococcus mutans TCI-170	[u'RIBOSOMAL']	[u'CLASS_II_BACTERIOCIN']	2	69_Antimicrobial protein BL-A60	0.545455		MNTKMMEQFETMDAETLSHVTGGGLYDGANGYAYRDSQGHWAYKVTKTPAQALTDVVVNSWASGAASFAAYA
ALZF01	ORAL	Streptococcus mutans B111SM-A	[u'RIBOSOMAL']	[u'CLASS_II_BACTERIOCIN']	5	69_Antimicrobial protein BL-A60	0.545455		MLVDILTIKKGGIHMNTKMMEQFETMDAETLSHVTGGGLYDGANGYAYRDSQGHWAYKVTKTPAQALTDVVVNSWASGAASFAAYA
CECD01	CSF	Streptococcus suis	[u'RIBOSOMAL']	[u'CLASS_II_LANTIPEPTIDE']	1	88_["A-3802-VI-7"]	0.678571	O=C(O)CCC4NC(=O)C(NC(=O)C6NC(=O)C(NC(=O)C(NC(=O)C1NC(=O)C(NC(=O)C(NC(=O)CNC(=O)C(NC(=O)C(NC(=O)C)CSC1)CO)Cc3c[nH]c2ccccc23)C(C)C)C(C)SCC(NC4(=O))C(=O)NCC(=O)NC5C(=O)NC(C(=O)NC(C(=O)NC(C(=O)NC(C(=O)NC(C(=O)OC)CS(=O)C5(C))C)CSC6(C))C(C)CC)C(C)C)CC(C)C)C(C)CC
AHRR01	ORAL	Streptococcus mutans 15VF2	[u'RIBOSOMAL']	[u'CLASS_II_BACTERIOCIN']	7	69_Antimicrobial protein BL-A60	0.545455		MLVDILTIKKGGIHMNTRMMEQFETMDAETLSHVTGGGLYDGANGYAYRDSQGHWAYKVTKTPAQALTDVVVNSWASGAASFAAYA
LAKF01	URINE	Staphylococcus pasteuri	[u'RIBOSOMAL']	[u'CLASS_II_LANTIPEPTIDE']	2	131_["nukacin ISK-1"]	1	CCC(C(C(N1CCCC1C(NC(C(NC(C(NC(C(NC(C(NC(C(NC(C(NC(C(NC(C(NC(C(NC(C(NC(C(NC(C(NC(C(NC(C(NC(C(N/C2=C/C)=O)Cc3ccccc3)=O)C(C)C)=O)Cc4ccccc4)=O)CCC(N)=O)=O)Cc5ccccc5)=O)CSCC(C(NC(C(O)=O)=C)=O)NC6=O)=O)CC(N)=O)=O)CCSC)=O)Cc7nc[nH]c7)=O)CS8)=O)CC(O)=O)=O)Cc9nc[nH]c9)=O)CSCC6NC2=O)=O)C(C)C)=O)C8C)=O)=O)NC(C(C(C)C)NC(CNC(C(NC(C(NC(C(NC(C(CCCCN)N)=O)CCCCN)=O)CCCCN)=O)=C)=O)=O)=O)C
AZMH01	GI	Streptococcus sp. DORA_10	[u'RIBOSOMAL']	[u'LASSO_PEPTIDE']	4	570_["SUNGSANPIN"]	0.55	OC[C@@H](C(N[C@H](C(N1CCC[C@H]1C(N[C@@H]([C@H](CC)C)C(N[C@@H](C2)C(N[C@H](C(N[C@@H](CC3=CC=CC=C3)C(NCC(N[C@H](C(N[C@H](C(N[C@@H](CC4=CNC5=C4C=CC=C5)C(N[C@H](C(O)=O)CC(C)C)=O)=O)CO)=O)CC(C)C)=O)=O)=O)CO)=O)=O)=O)=O)CCCCN)=O)NC(CNC([C@H](CC6=CC=CC=C6)NC(CNC2=O)=O)=O)=O
CDTR01	CSF	Streptococcus suis	[u'RIBOSOMAL']	[u'CLASS_II_LANTIPEPTIDE']	1	88_["A-3802-VI-7"]	0.678571	O=C(O)CCC4NC(=O)C(NC(=O)C6NC(=O)C(NC(=O)C(NC(=O)C1NC(=O)C(NC(=O)C(NC(=O)CNC(=O)C(NC(=O)C(NC(=O)C)CSC1)CO)Cc3c[nH]c2ccccc23)C(C)C)C(C)SCC(NC4(=O))C(=O)NCC(=O)NC5C(=O)NC(C(=O)NC(C(=O)NC(C(=O)NC(C(=O)NC(C(=O)OC)CS(=O)C5(C))C)CSC6(C))C(C)CC)C(C)C)CC(C)C)C(C)CC
LNPB01	STOOL	Enterococcus faecium	[u'RIBOSOMAL']	[u'CLASS_II_BACTERIOCIN']	1	16_Bacteriocin T8	1		MKKKVLKHCVILGILGTCLAGIGTGIKVDAATYYGNGLYCNKEKCWVDWNQAKGEIGKIIVNGWVNHGPWAPRR
LNPB01	STOOL	Enterococcus faecium	[u'RIBOSOMAL']	[u'CLASS_II_BACTERIOCIN']	3	40_Enterocin A	1		MKHLKILSIKETQLIYGGTTHSGKYYGNGVYCTKNKCTVDWAKATTCIAGMSIGGFLGGAIPGKC
ALYS01	ORAL	Streptococcus mutans B107SM-B	[u'RIBOSOMAL']	[u'CLASS_II_LANTIPEPTIDE']	2	193_Smb B	1	N[C@@H]([C@H](CC)C)C(NCC(N/C(C(N/C(C(N[C@H](C(N[C@H](C(N[C@H](C(NC(C(N/C(C(N[C@@H](CC1=CC=CC=C1)C(N[C@H](C(N[C@@H]([C@H](CC)C)C(N[C@H](C(N[C@H](C(NCC(N[C@H](C(N[C@H](C(NCC(N[C@@H](CC2=CC=C(C=C2)O)C(N[C@H]3[C@H](CC)C)=O)=O)=O)CCCCN)=O)CC(N)=O)=O)=O)CC(C)C)=O)C(C)C)=O)=O)CSC[C@@H](C(N[C@H](C(N[C@H](C(N[C@H](C(N[C@H](C(N[C@H](C(N[C@@H](CS4)C(N[C@@H](CCSC)C(N[C@H](C(N[C@H](C(N[C@@H](CS5)C(NC(C(N[C@H]…
ALYS01	ORAL	Streptococcus mutans B107SM-B	[u'RIBOSOMAL']	[u'CLASS_II_LANTIPEPTIDE']	5	127_["VARIACIN"]	0.688889	CCC(C(C(NC(C(NC(C(NC(C(NC(C(NC(C(NC(C(NC(C(NC(C(NC(C(NC(C(NC(C(NC(C(NC(C(N/C1=C/C)=O)Cc2ccccc2)=O)C(C)C)=O)Cc3ccccc3)=O)CCC(N)=O)=O)Cc4ccccc4)=O)CSCC(C(NC(C(O)=O)=C)=O)NC5=O)=O)CC(N)=O)=O)CCSC)=O)Cc6nc[nH]c6)=O)CS7)=O)CCC(O)=O)=O)Cc8nc[nH]c8)=O)CSCC5NC1=O)=O)NC(C(C7C)NC(C9CCCN9C(C(C(CC)C)NC(C(C(C)C)NC(CNC(C(NC(CN)=O)=C)=O)=O)=O)=O)=O)=O)C
JGTA01	RESPIRATORY	Staphylococcus aureus DAR1954	[u'RIBOSOMAL']	[u'BACTERIAL_HEAD_TO_TAIL_CYCLIZED']	3	595_Syanodin I	0.590909	CC(C[C@@H](C(N[C@H](C(NCC(O)=O)=O)C)=O)NC(CNC([C@@H](NC(CNC([C@@H](NC([C@@H]1CCCN1C([C@@H](NC([C@@H]2CC(NCC(N[C@H](C(N[C@H](C(NCC(NCC(N[C@H](C(N[C@H](C(N2)=O)C(C)C)=O)[C@H](O)C)=O)=O)=O)CO)=O)CC(C)C)=O)=O)=O)C)=O)=O)C)=O)=O)CCC(N)=O)=O)=O)C
JPNV01	URINE	Burkholderia pseudomallei	[u'RIBOSOMAL']	[u'LASSO_PEPTIDE']	13	561_["CAPISTRUIN"]	1	O[C@H](C)[C@@H](C(N1CCC[C@H]1C(NCC(N[C@@H](CC2=CC=CC=C2)C(N[C@H](C(N[C@H](C(N3CCC[C@H]3C(N[C@@H](C4)C(N[C@@H](C)C(N[C@H](C(N[C@H](C(N[C@@H]([C@H](CC)C)C(N[C@H](C(N[C@H](C(N[C@@H](CC5=CC=CC=C5)C(NCC(N[C@@H](CC6=CC=CC=C6)C(N[C@H](C(O)=O)CC(N)=O)=O)=O)=O)=O)CCCNC(N)=N)=O)CO)=O)=O)C(C)C)=O)CCCNC(N)=N)=O)=O)=O)=O)[C@@H](C)O)=O)CCC(N)=O)=O)=O)=O)=O)NC(CNC4=O)=O
AUYW01	STOOL	Clostridium botulinum A2 117	[u'RIBOSOMAL']	[u'LINEAR_AZOLE_CONTAINING_PEPTIDE']	3	603_clostridiolysin_S	0.875	NC(CS)C1=NC(C2=NC(C3=NC(C4=NC(C5=NC(C6=NC(C7=NC(C8=NC(C(NC(C9=NC(C(NC(C%10=NC(C(NC(C(NCC(NCC(NCC%11=NC(C(NC(C)C%12=NC(C%13=NC(C(NCC(NCC(NCC(NC(C)C(NC(C)C(NC(C)C(NCC(NC(C(NCC(NCC(NC(C(O)=O)CC(N)=O)=O)=O)=O)CCC(N)=O)=O)=O)=O)=O)=O)=O)=O)=O)=C(C)O%13)=CO%12)=O)=CO%11)=O)=O)=O)C(C)C)=O)=CO%10)C(C)C)=O)=CO9)C(C)C)=O)=CS8)=CS7)=CS6)=CS5)=CO4)=CS3)=CS2)=CS1
AZLX01	GI	Clostridium butyricum DORA_1	[u'RIBOSOMAL']	[u'LASSO_PEPTIDE']	1	546_["MICROVIRIDIN-B"]	0.555556	[H]C(O)(C)C([H])(NC(=O)CNC(=O)C([H])(NC(=O)C)Cc1ccccc1)C(=O)NC7([H])(C(=O)NC([H])(C(=O)NC3([H])(C(=O)NC([H])(C(=O)N8CCCC8([H])(C(=O)NC4([H])(C(=O)NC([H])(C(=O)NC([H])(C(=O)NC([H])(C(=O)NC([H])(C(=O)NC([H])(C(=O)O)Cc2ccc(O)cc2)CCC(=O)NCCCC3)CCC(=O)OC4)Cc5cc6ccccc6([nH]5))CC(=O)OC7([H])(C))))Cc9ccc(O)cc9))CC(C)C)
AGLH01	ORAL	Streptococcus mutans TCI-196	[u'RIBOSOMAL']	[u'CLASS_II_BACTERIOCIN']	2	69_Antimicrobial protein BL-A60	0.545455		MLVDILTIKKGGIHMNTKMMKQFETMDAETLSHITGGGLYDGANGYAYRDSQGHWAYKVTKTPAQALTDVVVNSWASGAASFAAYA
LOIO01	STOOL	Escherichia coli	[u'RIBOSOMAL']	[u'LINEAR_AZOLE_CONTAINING_PEPTIDE']	3	601_["MccB17","MICROCIN B17","MICROCIN 17W"]	1	O=C(O)C(N=C(O)C(N=C(O)C(N=C(O)CN=C(O)c1nc(oc1)CN=C(O)CN=C(O)c2nc(oc2)CN=C(O)CN=C(O)C(N=C(O)CN=C(O)CN=C(O)c3nc(oc3)c8nc(CN=C(O)C(N=C(O)C(N=C(O)c7nc(CN=C(O)CN=C(O)c6nc(CN=C(O)CN=C(O)CN=C(O)C(N=C(O)CN=C(O)CN=C(O)c5nc(c4nc(oc4)CN=C(O)CN=C(O)CN=C(O)CN=C(O)CN=C(O)CN=C(O)CN=C(O)CN=C(O)CN=C(O)CN=C(O)C(N=C(O)CN=C(O)C(N)C(C)C)C(C)CC)sc5)CCC(=N)O)sc6)sc7)CO)CC(=N)O)sc8)CC(=N)O)CO)Cc9cnc[nH]9)C(C)CC
JGPD01	RESPIRATORY	Staphylococcus aureus DAR3761	[u'RIBOSOMAL']	[u'BACTERIAL_HEAD_TO_TAIL_CYCLIZED']	2	569_["XANTHOMONIN II"]	0.578947	CC(C)C[C@@H](C(N[C@@H](C)C(NCC(N[C@H](C(N[C@H](C(N[C@@H](CCSC)C(NCC(NCC(N[C@@H]([C@H](CC)C)C(N[C@H](C(N[C@H](C(O)=O)[C@@H](C)O)=O)[C@@H](C)O)=O)=O)=O)=O)=O)CCC(O)=O)=O)CC1)=O)=O)=O)NC([C@@H]2CCCN2C(CNC(CNC1=O)=O)=O)=O
LNLG01	STOOL	Enterococcus faecium	[u'RIBOSOMAL']	[u'CLASS_II_BACTERIOCIN']	1	16_Bacteriocin T8	1		MKKKVLKHCVILGILGTCLAGIGTGIKVDAATYYGNGLYCNKEKCWVDWNQAKGEIGKIIVNGWVNHGPWAPRR
LNLG01	STOOL	Enterococcus faecium	[u'RIBOSOMAL']	[u'CLASS_II_BACTERIOCIN']	4	40_Enterocin A	1		MKHLKILSIKETQLIYGGTTHSGKYYGNGVYCTKNKCTVDWAKATTCIAGMSIGGFLGGAIPGKC
AHSM01	ORAL	Streptococcus mutans N66	[u'RIBOSOMAL']	[u'CLASS_I_LANTIPEPTIDE']	1	122_[MUTACIN B-NY266"]	1	C/C=C(C(NCC(NC(C(NC(C(NC(C(NC(C(NC1Cc2ccc(O)cc2)=O)CS/C=C/NC3=O)=O)CC(N)=O)=O)Cc4ccccc4)=O)CSCC3NC1=O)=O)=O)\NC(C(NC(C(NC(C(NC(CNC(C5CCCN56)=O)=O)CSC(C)C(NC(C(NC(C(NC(C(NC(C(N7)CC8=CNc9c8cccc9)=O)=C)=O)Cc%10ccccc%10)=O)CSCC(NC(C(NC(C(Cc%11ccccc%11)N)=O)CCCCN)=O)C7=O)=O)C6=O)=O)C)=O)CCCCN)=O
AHSM01	ORAL	Streptococcus mutans N66	[u'RIBOSOMAL']	[u'CLASS_II_BACTERIOCIN']	2	69_Antimicrobial protein BL-A60	0.545455		MNTRMMEQFETMDAETLSHVTGGGLYDGANGYAYRDSQGHWAYKVTKTPAQALTDVVVNSWASGAASFAAYA
LFVQ01	SKIN	Staphylococcus aureus subsp. aureus	[u'RIBOSOMAL']	[u'CLASS_I_LANTIPEPTIDE']	4	105_["Lanthionine containing peptide","HYICIN M51"]	0.952381	O=C(N)CC5NC(=O)C(NC(=O)C(NC(=O)CNC(=O)C(=CC)NC(=O)C(NC(=O)C(NC(=O)C3NC(=O)CNC(=O)C4N(C(=O)C(NC(=O)C1NC(=O)C(NC(=O)C(=C)NC(=O)C(NC(=O)C(NC(=O)C(=CC)NC(=O)C(N)C(C)CC)CSC1)Cc2ccccc2)CC(C)C)C(C)SC3)CCC4)C)CCCCN)CSCC6NC(=O)C(NC(=O)C(NC5(=O))CSC=CNC6(=O))Cc7ccc(O)cc7)Cc8ccccc8
LTON01	VAGINA	Staphylococcus sp. HMSC074C12	[u'RIBOSOMAL']	[u'CLASS_II_LANTIPEPTIDE']	2	161_["Avermipeptin"]	0.702703	NCC(NCC(NCC(N[C@@H](C)C(N[C@H](C(N/C(C(N[C@H]1C(C)C)=O)=C\C)=O)C[C@](CSC[C@@H](C(N[C@H](C(N[C@H](C(N[C@@H](C)C(N[C@H]2C)=O)=O)C[C@](CSC[C@@H](C(N[C@H](C(O)=O)CC(C)C)=O)NC3=O)(C(N[C@H](C(N[C@H](C(N[C@H]3CC(C)C)=O)CC(C)C)=O)C(C)C)=O)NC2=O)=O)C(C)C)=O)NC4=O)(C(N[C@H](C(N[C@H](C(NC4=C)=O)CC(C)C)=O)CC(C)C)=O)NC1=O)=O)=O)=O)=O
CDYW01	CSF	Streptococcus suis	[u'RIBOSOMAL']	[u'CLASS_II_LANTIPEPTIDE']	1	88_["A-3802-VI-7"]	0.678571	O=C(O)CCC4NC(=O)C(NC(=O)C6NC(=O)C(NC(=O)C(NC(=O)C1NC(=O)C(NC(=O)C(NC(=O)CNC(=O)C(NC(=O)C(NC(=O)C)CSC1)CO)Cc3c[nH]c2ccccc23)C(C)C)C(C)SCC(NC4(=O))C(=O)NCC(=O)NC5C(=O)NC(C(=O)NC(C(=O)NC(C(=O)NC(C(=O)NC(C(=O)OC)CS(=O)C5(C))C)CSC6(C))C(C)CC)C(C)C)CC(C)C)C(C)CC
LVYM01	ORAL	Streptococcus pyogenes	[u'RIBOSOMAL']	[u'LINEAR_AZOLE_CONTAINING_PEPTIDE']	1	600_["PLANTAZOLICIN B"]	0.789474	O=C(O)C(N=C(O)C1N=C(OC1(C))c2nc(oc2)c3nc(oc3)c4nc(oc4)c5nc(oc5)C(N=C(O)C(N=C(O)c6nc(oc6C)c7nc(oc7C)c%10nc(c8nc(oc8C)c9nc(C(N)CCCNC(=N)N)sc9)sc%10)C(C)CC)C(C)CC)Cc%11ccccc%11
LVYM01	ORAL	Streptococcus pyogenes	[u'RIBOSOMAL']	[u'CLASS_I_LANTIPEPTIDE']	2	124_["STREPTIN"]	1	CC(CC1NC(C(NC(C(NC(C(NC(CNC(C(C(C)C)N)=O)=O)CSCC(C(NC(C(N2CCCC2C(NCC(NC(C(NC(C(NC(C(NC(C(NC(C(NC3C(C)C)=O)CC(C)C)=O)CCCCN)=O)CC4=CNc5c4cccc5)=O)CS6)=O)CSCC(C(NC(C(N/C(C(N/C(C(N/C(C(NC(C(NC(C(O)=O)CCCCN)=O)C(C)C)=O)=C/C)=O)=C/C)=O)=C/C)=O)Cc7ccccc7)=O)NC3=O)=O)=O)=O)C6C)=O)NC1=O)=O)CCCNC(N)=N)=O)Cc8ccc(O)cc8)=O)C
LVYM01	ORAL	Streptococcus pyogenes	[u'RIBOSOMAL']	[u'CLASS_II_LANTIPEPTIDE']	4	121_["SALIVARICIN A"]	0.9375	CCC(C(C(NC(C(NC(C(NC(C(NC(C(NC(C(NC(C(NC(C(N1CCCC1C(NC(C(NC(C(NC(C(NC(C(NC(C(NC2CS3)=O)C(C)C)=O)Cc4ccccc4)=O)C(C)C)=O)CSCC(C(O)=O)NC2=O)=O)CC(N)=O)=O)=O)CS5)=O)CC(O)=O)=O)CC(O)=O)=O)C3C)=O)C(CC)C)=O)C5C)=O)C)=O)NC(C(NC(CNC(C(NC(CNC(C(NC(C(CCCCN)N)=O)CCCNC(N)=N)=O)=O)CO)=O)=O)CC6=CNc7c6cccc7)=O)C
AHRX01	ORAL	Streptococcus mutans A9	[u'RIBOSOMAL']	[u'CLASS_II_LANTIPEPTIDE']	1	193_Smb B	1	N[C@@H]([C@H](CC)C)C(NCC(N/C(C(N/C(C(N[C@H](C(N[C@H](C(N[C@H](C(NC(C(N/C(C(N[C@@H](CC1=CC=CC=C1)C(N[C@H](C(N[C@@H]([C@H](CC)C)C(N[C@H](C(N[C@H](C(NCC(N[C@H](C(N[C@H](C(NCC(N[C@@H](CC2=CC=C(C=C2)O)C(N[C@H]3[C@H](CC)C)=O)=O)=O)CCCCN)=O)CC(N)=O)=O)=O)CC(C)C)=O)C(C)C)=O)=O)CSC[C@@H](C(N[C@H](C(N[C@H](C(N[C@H](C(N[C@H](C(N[C@H](C(N[C@@H](CS4)C(N[C@@H](CCSC)C(N[C@H](C(N[C@H](C(N[C@@H](CS5)C(NC(C(N[C@H]…
AHRX01	ORAL	Streptococcus mutans A9	[u'RIBOSOMAL']	[u'CLASS_II_BACTERIOCIN']	5	69_Antimicrobial protein BL-A60	0.545455		MNTKMMEQFETMDAETLSHVTGGGLYDGANGYAYRDSQGHWAYKVTKTPAQALTDVVVNSWASGAASFAAYA
JGOS01	URINE	Staphylococcus aureus DAR3613	[u'RIBOSOMAL']	[u'BACTERIAL_HEAD_TO_TAIL_CYCLIZED']	3	569_["XANTHOMONIN II"]	0.578947	CC(C)C[C@@H](C(N[C@@H](C)C(NCC(N[C@H](C(N[C@H](C(N[C@@H](CCSC)C(NCC(NCC(N[C@@H]([C@H](CC)C)C(N[C@H](C(N[C@H](C(O)=O)[C@@H](C)O)=O)[C@@H](C)O)=O)=O)=O)=O)=O)CCC(O)=O)=O)CC1)=O)=O)=O)NC([C@@H]2CCCN2C(CNC(CNC1=O)=O)=O)=O
JHQN01	SKIN	Bacillus cereus	[u'RIBOSOMAL']	[u'THIOPEPTIDE']	1	346_["BERNINAMYCIN-C"]	0.76	O=C(N)C(=C)NC(=O)c4nc5c1nc(oc1)C(=C)NC(=O)C(=C)NC(=O)c2nc(oc2C)C(=C)NC(=O)C(NC(=O)C(=C)NC(=O)c3nc(oc3C)C(=CC)NC(=O)C(NC(=O)c6nc(c5(cc4))sc6)C(O)C)C(O)(C)C
LTHG01	RESPIRATORY	Streptococcus sp. HMSC073F11	[u'RIBOSOMAL']	[u'SACTIPEPTIDE']	1	605_["Subtilosin-A, partial structure"]	0.666667	O=C([C@@H](NN[C@H](C(NCC(N[C@@H](CS[C@](N1)(CC2=CC=CC=C2)C(NCC(N[C@H](C(N[C@H]3CC4=CNC5=C4C=CC=C5)=O)CC(C)C)=O)=O)C(N[C@@H](C)C(N[C@]([H])(C(N[C@@H](CS6)C(N[C@H](C(N[C@]([H])(C(NCC(N[C@@H](C)C(N[C@@H](C)C(N[C@@H](CSC(N7)(CC8=CC=CC=C8)C(N[C@H](C(N[C@]([H])(C(N[C@@H](C)C(NCC(N[C@@H](C)C(NC6(C(NCC(N[C@H](C1=O)CC(C)C)=O)=O)[C@H](O)C)=O)=O)=O)=O)[C@@H](C)CC)=O)CCC(O)=O)=O)C(N[C@H](C(N[C@H](C(N[C@@H](C…
JNRL01	STOOL	Escherichia coli 2-474-04_S3_C3	[u'RIBOSOMAL']	[u'LINEAR_AZOLE_CONTAINING_PEPTIDE']	5	601_["MccB17","MICROCIN B17","MICROCIN 17W"]	0.924528	O=C(O)C(N=C(O)C(N=C(O)C(N=C(O)CN=C(O)c1nc(oc1)CN=C(O)CN=C(O)c2nc(oc2)CN=C(O)CN=C(O)C(N=C(O)CN=C(O)CN=C(O)c3nc(oc3)c8nc(CN=C(O)C(N=C(O)C(N=C(O)c7nc(CN=C(O)CN=C(O)c6nc(CN=C(O)CN=C(O)CN=C(O)C(N=C(O)CN=C(O)CN=C(O)c5nc(c4nc(oc4)CN=C(O)CN=C(O)CN=C(O)CN=C(O)CN=C(O)CN=C(O)CN=C(O)CN=C(O)CN=C(O)CN=C(O)C(N=C(O)CN=C(O)C(N)C(C)C)C(C)CC)sc5)CCC(=N)O)sc6)sc7)CO)CC(=N)O)sc8)CC(=N)O)CO)Cc9cnc[nH]9)C(C)CC
AGKP01	ORAL	Streptococcus mutans TCI-145	[u'RIBOSOMAL']	[u'CLASS_II_BACTERIOCIN']	3	69_Antimicrobial protein BL-A60	0.545455		MLVDILTIKKGGIHMNTKMMEQFETMDAETLSHVTGGGLYDGANGYAYRDSQGHWAYKVTKTPAQALTDVVVNSWASGAASFAAYA
AORA01	URINE	Escherichia coli TOP2652	[u'RIBOSOMAL']	[u'LINEAR_AZOLE_CONTAINING_PEPTIDE']	6	601_["MccB17","MICROCIN B17","MICROCIN 17W"]	1	O=C(O)C(N=C(O)C(N=C(O)C(N=C(O)CN=C(O)c1nc(oc1)CN=C(O)CN=C(O)c2nc(oc2)CN=C(O)CN=C(O)C(N=C(O)CN=C(O)CN=C(O)c3nc(oc3)c8nc(CN=C(O)C(N=C(O)C(N=C(O)c7nc(CN=C(O)CN=C(O)c6nc(CN=C(O)CN=C(O)CN=C(O)C(N=C(O)CN=C(O)CN=C(O)c5nc(c4nc(oc4)CN=C(O)CN=C(O)CN=C(O)CN=C(O)CN=C(O)CN=C(O)CN=C(O)CN=C(O)CN=C(O)CN=C(O)C(N=C(O)CN=C(O)C(N)C(C)C)C(C)CC)sc5)CCC(=N)O)sc6)sc7)CO)CC(=N)O)sc8)CC(=N)O)CO)Cc9cnc[nH]9)C(C)CC
ALYZ01	ORAL	Streptococcus mutans B082SM-A	[u'RIBOSOMAL']	[u'CLASS_II_LANTIPEPTIDE']	7	129_["streptococcin A-M49"]	0.804348	CCC(C(C(NC(C(NC(C(NC(C(NC(C(NC(C(NC(C(NC(C(NC1C(NC(C(NC(C(NC(C(NC(C(NC(C(N/C2=C\C)=O)C)=O)CC(C)C)=O)Cc3ccccc3)=O)C)=O)CC4=CNc5c4cccc5)=O)=O)CC(N)=O)=O)CC(C)C)=O)Cc6nc[nH]c6)=O)CS7)=O)CCC(O)=O)=O)Cc8nc[nH]c8)=O)CSCC(C(NC(C(NC(C(O)=O)=C)=O)CSC1C)=O)NC2=O)=O)NC(C(C7C)NC(C(NC(C(NC(C(C(C)C)NC(CNC(C(NC(C(NC(CN)=O)CCCCN)=O)CC(N)=O)=O)=O)=O)Cc9ccccc9)=O)CCCCN)=O)=O)C
JGRW01	URINE	Staphylococcus aureus DAR1310	[u'RIBOSOMAL']	[u'BACTERIAL_HEAD_TO_TAIL_CYCLIZED']	3	595_Syanodin I	0.590909	CC(C[C@@H](C(N[C@H](C(NCC(O)=O)=O)C)=O)NC(CNC([C@@H](NC(CNC([C@@H](NC([C@@H]1CCCN1C([C@@H](NC([C@@H]2CC(NCC(N[C@H](C(N[C@H](C(NCC(NCC(N[C@H](C(N[C@H](C(N2)=O)C(C)C)=O)[C@H](O)C)=O)=O)=O)CO)=O)CC(C)C)=O)=O)=O)C)=O)=O)C)=O)=O)CCC(N)=O)=O)=O)C
AGMP01	ORAL	Streptococcus mutans TCI-400	[u'RIBOSOMAL']	[u'CLASS_II_BACTERIOCIN']	2	69_Antimicrobial protein BL-A60	0.545455		MLVDILTIKKGGIHMNTRMMEQFETMDAETLSHVTGGGLYDGANGYAYRDSQGHWAYKVTKTPAQALTDVVVNSWASGAASFAAYA
AGLX01	ORAL	Streptococcus mutans TCI-242	[u'RIBOSOMAL']	[u'CLASS_II_BACTERIOCIN']	2	69_Antimicrobial protein BL-A60	0.545455		MNTRMMEQFETMDAETLSHVTGGGLYDGANGYAYRDSQGHWAYKVTKTPAQALTDVVVNSWASGAASFAAYA
AGMI01	ORAL	Streptococcus mutans TCI-280	[u'RIBOSOMAL']	[u'CLASS_II_BACTERIOCIN']	2	69_Antimicrobial protein BL-A60	0.545455		MNTRMMEQFETMDAETLSHVTGGGLYDGANGYAYRDSQGHWAYKVTKTPAQALTDVVVNSWASGAASFAAYA
JGPF01	FEET	Staphylococcus aureus DAR3765	[u'RIBOSOMAL']	[u'BACTERIAL_HEAD_TO_TAIL_CYCLIZED']	2	569_["XANTHOMONIN II"]	0.578947	CC(C)C[C@@H](C(N[C@@H](C)C(NCC(N[C@H](C(N[C@H](C(N[C@@H](CCSC)C(NCC(NCC(N[C@@H]([C@H](CC)C)C(N[C@H](C(N[C@H](C(O)=O)[C@@H](C)O)=O)[C@@H](C)O)=O)=O)=O)=O)=O)CCC(O)=O)=O)CC1)=O)=O)=O)NC([C@@H]2CCCN2C(CNC(CNC1=O)=O)=O)=O
LRGS01	SKIN	Streptococcus pyogenes	[u'RIBOSOMAL']	[u'CLASS_II_LANTIPEPTIDE']	1	121_["SALIVARICIN A"]	0.9375	CCC(C(C(NC(C(NC(C(NC(C(NC(C(NC(C(NC(C(NC(C(N1CCCC1C(NC(C(NC(C(NC(C(NC(C(NC(C(NC2CS3)=O)C(C)C)=O)Cc4ccccc4)=O)C(C)C)=O)CSCC(C(O)=O)NC2=O)=O)CC(N)=O)=O)=O)CS5)=O)CC(O)=O)=O)CC(O)=O)=O)C3C)=O)C(CC)C)=O)C5C)=O)C)=O)NC(C(NC(CNC(C(NC(CNC(C(NC(C(CCCCN)N)=O)CCCNC(N)=N)=O)=O)CO)=O)=O)CC6=CNc7c6cccc7)=O)C
LRGS01	SKIN	Streptococcus pyogenes	[u'RIBOSOMAL']	[u'LINEAR_AZOLE_CONTAINING_PEPTIDE']	3	600_["PLANTAZOLICIN B"]	0.789474	O=C(O)C(N=C(O)C1N=C(OC1(C))c2nc(oc2)c3nc(oc3)c4nc(oc4)c5nc(oc5)C(N=C(O)C(N=C(O)c6nc(oc6C)c7nc(oc7C)c%10nc(c8nc(oc8C)c9nc(C(N)CCCNC(=N)N)sc9)sc%10)C(C)CC)C(C)CC)Cc%11ccccc%11
LRGS01	SKIN	Streptococcus pyogenes	[u'RIBOSOMAL']	[u'CLASS_I_LANTIPEPTIDE']	5	124_["STREPTIN"]	1	CC(CC1NC(C(NC(C(NC(C(NC(CNC(C(C(C)C)N)=O)=O)CSCC(C(NC(C(N2CCCC2C(NCC(NC(C(NC(C(NC(C(NC(C(NC(C(NC3C(C)C)=O)CC(C)C)=O)CCCCN)=O)CC4=CNc5c4cccc5)=O)CS6)=O)CSCC(C(NC(C(N/C(C(N/C(C(N/C(C(NC(C(NC(C(O)=O)CCCCN)=O)C(C)C)=O)=C/C)=O)=C/C)=O)=C/C)=O)Cc7ccccc7)=O)NC3=O)=O)=O)=O)C6C)=O)NC1=O)=O)CCCNC(N)=N)=O)Cc8ccc(O)cc8)=O)C
JSKS01	URINE	Escherichia coli	[u'RIBOSOMAL']	[u'LINEAR_AZOLE_CONTAINING_PEPTIDE']	1	601_["MccB17","MICROCIN B17","MICROCIN 17W"]	1	O=C(O)C(N=C(O)C(N=C(O)C(N=C(O)CN=C(O)c1nc(oc1)CN=C(O)CN=C(O)c2nc(oc2)CN=C(O)CN=C(O)C(N=C(O)CN=C(O)CN=C(O)c3nc(oc3)c8nc(CN=C(O)C(N=C(O)C(N=C(O)c7nc(CN=C(O)CN=C(O)c6nc(CN=C(O)CN=C(O)CN=C(O)C(N=C(O)CN=C(O)CN=C(O)c5nc(c4nc(oc4)CN=C(O)CN=C(O)CN=C(O)CN=C(O)CN=C(O)CN=C(O)CN=C(O)CN=C(O)CN=C(O)CN=C(O)C(N=C(O)CN=C(O)C(N)C(C)C)C(C)CC)sc5)CCC(=N)O)sc6)sc7)CO)CC(=N)O)sc8)CC(=N)O)CO)Cc9cnc[nH]9)C(C)CC
JGTD01	RESPIRATORY	Staphylococcus aureus DAR1961	[u'RIBOSOMAL']	[u'BACTERIAL_HEAD_TO_TAIL_CYCLIZED']	3	595_Syanodin I	0.590909	CC(C[C@@H](C(N[C@H](C(NCC(O)=O)=O)C)=O)NC(CNC([C@@H](NC(CNC([C@@H](NC([C@@H]1CCCN1C([C@@H](NC([C@@H]2CC(NCC(N[C@H](C(N[C@H](C(NCC(NCC(N[C@H](C(N[C@H](C(N2)=O)C(C)C)=O)[C@H](O)C)=O)=O)=O)CO)=O)CC(C)C)=O)=O)=O)C)=O)=O)C)=O)=O)CCC(N)=O)=O)=O)C
CDYO01	CSF	Streptococcus suis	[u'RIBOSOMAL']	[u'CLASS_II_LANTIPEPTIDE']	2	88_["A-3802-VI-7"]	0.678571	O=C(O)CCC4NC(=O)C(NC(=O)C6NC(=O)C(NC(=O)C(NC(=O)C1NC(=O)C(NC(=O)C(NC(=O)CNC(=O)C(NC(=O)C(NC(=O)C)CSC1)CO)Cc3c[nH]c2ccccc23)C(C)C)C(C)SCC(NC4(=O))C(=O)NCC(=O)NC5C(=O)NC(C(=O)NC(C(=O)NC(C(=O)NC(C(=O)NC(C(=O)OC)CS(=O)C5(C))C)CSC6(C))C(C)CC)C(C)C)CC(C)C)C(C)CC
AHSR01	ORAL	Streptococcus mutans SM6	[u'RIBOSOMAL']	[u'CLASS_II_LANTIPEPTIDE']	4	129_["streptococcin A-M49"]	0.804348	CCC(C(C(NC(C(NC(C(NC(C(NC(C(NC(C(NC(C(NC(C(NC1C(NC(C(NC(C(NC(C(NC(C(NC(C(N/C2=C\C)=O)C)=O)CC(C)C)=O)Cc3ccccc3)=O)C)=O)CC4=CNc5c4cccc5)=O)=O)CC(N)=O)=O)CC(C)C)=O)Cc6nc[nH]c6)=O)CS7)=O)CCC(O)=O)=O)Cc8nc[nH]c8)=O)CSCC(C(NC(C(NC(C(O)=O)=C)=O)CSC1C)=O)NC2=O)=O)NC(C(C7C)NC(C(NC(C(NC(C(C(C)C)NC(CNC(C(NC(C(NC(CN)=O)CCCCN)=O)CC(N)=O)=O)=O)=O)Cc9ccccc9)=O)CCCCN)=O)=O)C
AVAJ01	RESPIRATORY	Burkholderia pseudomallei MSHR5848	[u'RIBOSOMAL']	[u'LASSO_PEPTIDE']	18	561_["CAPISTRUIN"]	1	O[C@H](C)[C@@H](C(N1CCC[C@H]1C(NCC(N[C@@H](CC2=CC=CC=C2)C(N[C@H](C(N[C@H](C(N3CCC[C@H]3C(N[C@@H](C4)C(N[C@@H](C)C(N[C@H](C(N[C@H](C(N[C@@H]([C@H](CC)C)C(N[C@H](C(N[C@H](C(N[C@@H](CC5=CC=CC=C5)C(NCC(N[C@@H](CC6=CC=CC=C6)C(N[C@H](C(O)=O)CC(N)=O)=O)=O)=O)=O)CCCNC(N)=N)=O)CO)=O)=O)C(C)C)=O)CCCNC(N)=N)=O)=O)=O)=O)[C@@H](C)O)=O)CCC(N)=O)=O)=O)=O)=O)NC(CNC4=O)=O
AGMS01	ORAL	Streptococcus mutans TCI-70	[u'RIBOSOMAL']	[u'CLASS_II_BACTERIOCIN']	3	69_Antimicrobial protein BL-A60	0.545455		MLVDILTIKKGGIHMNTRMMEQFETMDAETLSHVTGGGLYDGANGYAYRDSQGHWAYKVTKTPAQALTDVVVNSWASGAASFAAYA
AQTK01	FEET	Burkholderia pseudomallei 406e	[u'RIBOSOMAL']	[u'LASSO_PEPTIDE']	5	561_["CAPISTRUIN"]	0.875	O[C@H](C)[C@@H](C(N1CCC[C@H]1C(NCC(N[C@@H](CC2=CC=CC=C2)C(N[C@H](C(N[C@H](C(N3CCC[C@H]3C(N[C@@H](C4)C(N[C@@H](C)C(N[C@H](C(N[C@H](C(N[C@@H]([C@H](CC)C)C(N[C@H](C(N[C@H](C(N[C@@H](CC5=CC=CC=C5)C(NCC(N[C@@H](CC6=CC=CC=C6)C(N[C@H](C(O)=O)CC(N)=O)=O)=O)=O)=O)CCCNC(N)=N)=O)CO)=O)=O)C(C)C)=O)CCCNC(N)=N)=O)=O)=O)=O)[C@@H](C)O)=O)CCC(N)=O)=O)=O)=O)=O)NC(CNC4=O)=O
BCYL01	STOOL	Bifidobacterium longum subsp. longum	[u'RIBOSOMAL']	[u'CLASS_II_LANTIPEPTIDE']	1	199_Microbisporicin B	0.727273	NC(C(N/C(C(NC(C(NC(C(C)C)C(NC(C(NC1CC(C)C)=O)=C)=O)=O)CSCC(C(NC2C(NC(C(NC(CC3=CC=CC=C3)C(NC(CSC2C)C(NC(C(NC4C(NC(C(NCC(NCC(NCC(NC5C(NC(C(NC(CSC4)C(NC6C(NC(CC7=CC=CC=C7)C(NC(CSC5)C(N/C=C\SC6)=O)=O)=O)=O)=O)CC8=CC=CC=C8)=O)=O)=O)=O)=O)CCC(N)=O)=O)=O)C(C)O)=O)=O)=O)C)=O)=O)NC1=O)=O)=C\C)=O)C(C)CC
ADAN01	VAGINA	Gardnerella vaginalis 5-1	[u'RIBOSOMAL']	[u'CLASS_II_LANTIPEPTIDE']	1	123_["RUMINOCOCCIN A"]	0.692308	CCC(C(C(NC(C(NC(C(NC(C(NC(C(NC(C(NC(C(NC(C(N/C(C(NC(C(NC(C(NC(C(NC(C(NC(C(NC1C2C)=O)Cc3ccccc3)=O)CC(C)C)=O)Cc4ccccc4)=O)CCC(N)=O)=O)CC5=CNc6c5cccc6)=O)=C/C)=O)CC(N)=O)=O)CCSC)=O)CC(N)=O)=O)CS)=O)CCC(O)=O)=O)Cc7nc[nH]c7)=O)CSCC(C(N/C=C\S2)=O)NC1=O)=O)NC(/C(NC(C(NC(C(NC(C(C(C)C)NC(CNC(C(NC(CN)=O)CC(N)=O)=O)=O)=O)CC(C)C)=O)CCCCN)=O)=C/C)=O)C
CEBE01	CSF	Streptococcus suis	[u'RIBOSOMAL']	[u'CLASS_I_LANTIPEPTIDE']	1	148_["NISIN U"]	0.941176	CCC(C(C(N/C(C(NC(C(NC(C(NC(C(NC1CC(C)C)=O)=C)=O)CCCCN)=O)CSCC(C(NC(C(N2CCCC2C(NCC(NC(C(NC(C(NC(C(NCC(NC(C(NC(C(NC(C(N/C(C(NC(C(N3CCCC3C(NC(C(NC(C(NC(C(NC(C(NC(C(NC(C(NCC(NC(C(NC(C(NC(C(NCC(O)=O)=O)Cc4ccccc4)=O)Cc5nc[nH]c5)=O)CS6)=O)=O)CS7)=O)C6C)=O)C)=O)C7C)=O)CCCCN)=O)CC(C)C)=O)=O)CS8)=O)=C\C)=O)CCSC)=O)CC(C)C)=O)C(CC)C)=O)=O)C8C)=O)CCCCN)=O)CS9)=O)=O)=O)C9C)=O)NC1=O)=O)=C\C)=O)N)C
LFVN01	SKIN	Staphylococcus aureus subsp. aureus	[u'RIBOSOMAL']	[u'CLASS_I_LANTIPEPTIDE']	4	105_["Lanthionine containing peptide","HYICIN M51"]	0.952381	O=C(N)CC5NC(=O)C(NC(=O)C(NC(=O)CNC(=O)C(=CC)NC(=O)C(NC(=O)C(NC(=O)C3NC(=O)CNC(=O)C4N(C(=O)C(NC(=O)C1NC(=O)C(NC(=O)C(=C)NC(=O)C(NC(=O)C(NC(=O)C(=CC)NC(=O)C(N)C(C)CC)CSC1)Cc2ccccc2)CC(C)C)C(C)SC3)CCC4)C)CCCCN)CSCC6NC(=O)C(NC(=O)C(NC5(=O))CSC=CNC6(=O))Cc7ccc(O)cc7)Cc8ccccc8
JGQO01	URINE	Staphylococcus aureus DAR3919	[u'RIBOSOMAL']	[u'BACTERIAL_HEAD_TO_TAIL_CYCLIZED']	2	595_Syanodin I	0.590909	CC(C[C@@H](C(N[C@H](C(NCC(O)=O)=O)C)=O)NC(CNC([C@@H](NC(CNC([C@@H](NC([C@@H]1CCCN1C([C@@H](NC([C@@H]2CC(NCC(N[C@H](C(N[C@H](C(NCC(NCC(N[C@H](C(N[C@H](C(N2)=O)C(C)C)=O)[C@H](O)C)=O)=O)=O)CO)=O)CC(C)C)=O)=O)=O)C)=O)=O)C)=O)=O)CCC(N)=O)=O)=O)C
JOQQ01	STOOL	Escherichia coli 5-172-05_S3_C1	[u'RIBOSOMAL']	[u'LINEAR_AZOLE_CONTAINING_PEPTIDE']	4	601_["MccB17","MICROCIN B17","MICROCIN 17W"]	0.924528	O=C(O)C(N=C(O)C(N=C(O)C(N=C(O)CN=C(O)c1nc(oc1)CN=C(O)CN=C(O)c2nc(oc2)CN=C(O)CN=C(O)C(N=C(O)CN=C(O)CN=C(O)c3nc(oc3)c8nc(CN=C(O)C(N=C(O)C(N=C(O)c7nc(CN=C(O)CN=C(O)c6nc(CN=C(O)CN=C(O)CN=C(O)C(N=C(O)CN=C(O)CN=C(O)c5nc(c4nc(oc4)CN=C(O)CN=C(O)CN=C(O)CN=C(O)CN=C(O)CN=C(O)CN=C(O)CN=C(O)CN=C(O)CN=C(O)C(N=C(O)CN=C(O)C(N)C(C)C)C(C)CC)sc5)CCC(=N)O)sc6)sc7)CO)CC(=N)O)sc8)CC(=N)O)CO)Cc9cnc[nH]9)C(C)CC
JYPI01	STOOL	Bacillus cereus	[u'RIBOSOMAL']	[u'CLASS_II_LANTIPEPTIDE']	5	186_cerecidin A7	1	N[C@H](C(N/C(C(N1CCC[C@H]1C(N[C@H](C(N[C@@H](CS2)C(N[C@H](C(NCC(N[C@H](C(N[C@@H]([C@H](CC)C)C(N[C@@H]([C@H](CC)C)C(NCC(N[C@@H]([C@H](CC)C)C(N/C(C(N[C@@H](C)C(N[C@H](C(N[C@@H]([C@H](CC)C)C(N[C@H](C(N[C@H]3[C@H](CC)C)=O)CCCCN)=O)=O)CSC[C@@H](C(N[C@H](C(O)=O)CCCCN)=O)NC3=O)=O)=O)=C/C)=O)=O)=O)=O)=O)C(C)C)=O)=O)C(C)C)=O)=O)CC(C)C)=O)=O)=C\C)=O)C2C
JRLK01	SKIN	Streptococcus pyogenes AA472	[u'RIBOSOMAL']	[u'LINEAR_AZOLE_CONTAINING_PEPTIDE']	2	600_["PLANTAZOLICIN B"]	0.789474	O=C(O)C(N=C(O)C1N=C(OC1(C))c2nc(oc2)c3nc(oc3)c4nc(oc4)c5nc(oc5)C(N=C(O)C(N=C(O)c6nc(oc6C)c7nc(oc7C)c%10nc(c8nc(oc8C)c9nc(C(N)CCCNC(=N)N)sc9)sc%10)C(C)CC)C(C)CC)Cc%11ccccc%11
JRLK01	SKIN	Streptococcus pyogenes AA472	[u'RIBOSOMAL']	[u'CLASS_II_LANTIPEPTIDE']	4	121_["SALIVARICIN A"]	0.9375	CCC(C(C(NC(C(NC(C(NC(C(NC(C(NC(C(NC(C(NC(C(N1CCCC1C(NC(C(NC(C(NC(C(NC(C(NC(C(NC2CS3)=O)C(C)C)=O)Cc4ccccc4)=O)C(C)C)=O)CSCC(C(O)=O)NC2=O)=O)CC(N)=O)=O)=O)CS5)=O)CC(O)=O)=O)CC(O)=O)=O)C3C)=O)C(CC)C)=O)C5C)=O)C)=O)NC(C(NC(CNC(C(NC(CNC(C(NC(C(CCCCN)N)=O)CCCNC(N)=N)=O)=O)CO)=O)=O)CC6=CNc7c6cccc7)=O)C
JGPV01	RESPIRATORY	Staphylococcus aureus DAR3847	[u'RIBOSOMAL']	[u'BACTERIAL_HEAD_TO_TAIL_CYCLIZED']	2	276_["PRE-T","10381-T","PRE-10381-T"]	0.571429	O=C(N)c3nc4c1nc(oc1C)C(NC(=O)c6nc(C(NC(=O)c2nc(oc2C)CNC(=O)C(NC(=O)c5nc(c4(cc3))sc5)C(C)C)C)sc6)C
JJMT01	ORAL	Streptococcus salivarius	[u'RIBOSOMAL']	[u'CLASS_II_LANTIPEPTIDE']	1	129_["streptococcin A-M49"]	0.956522	CCC(C(C(NC(C(NC(C(NC(C(NC(C(NC(C(NC(C(NC(C(NC1C(NC(C(NC(C(NC(C(NC(C(NC(C(N/C2=C\C)=O)C)=O)CC(C)C)=O)Cc3ccccc3)=O)C)=O)CC4=CNc5c4cccc5)=O)=O)CC(N)=O)=O)CC(C)C)=O)Cc6nc[nH]c6)=O)CS7)=O)CCC(O)=O)=O)Cc8nc[nH]c8)=O)CSCC(C(NC(C(NC(C(O)=O)=C)=O)CSC1C)=O)NC2=O)=O)NC(C(C7C)NC(C(NC(C(NC(C(C(C)C)NC(CNC(C(NC(C(NC(CN)=O)CCCCN)=O)CC(N)=O)=O)=O)=O)Cc9ccccc9)=O)CCCCN)=O)=O)C
JJMT01	ORAL	Streptococcus salivarius	[u'RIBOSOMAL']	[u'CLASS_I_LANTIPEPTIDE']	2	124_["STREPTIN"]	1	CC(CC1NC(C(NC(C(NC(C(NC(CNC(C(C(C)C)N)=O)=O)CSCC(C(NC(C(N2CCCC2C(NCC(NC(C(NC(C(NC(C(NC(C(NC(C(NC3C(C)C)=O)CC(C)C)=O)CCCCN)=O)CC4=CNc5c4cccc5)=O)CS6)=O)CSCC(C(NC(C(N/C(C(N/C(C(N/C(C(NC(C(NC(C(O)=O)CCCCN)=O)C(C)C)=O)=C/C)=O)=C/C)=O)=C/C)=O)Cc7ccccc7)=O)NC3=O)=O)=O)=O)C6C)=O)NC1=O)=O)CCCNC(N)=N)=O)Cc8ccc(O)cc8)=O)C
LOJC01	STOOL	Escherichia coli	[u'RIBOSOMAL']	[u'LINEAR_AZOLE_CONTAINING_PEPTIDE']	2	601_["MccB17","MICROCIN B17","MICROCIN 17W"]	1	O=C(O)C(N=C(O)C(N=C(O)C(N=C(O)CN=C(O)c1nc(oc1)CN=C(O)CN=C(O)c2nc(oc2)CN=C(O)CN=C(O)C(N=C(O)CN=C(O)CN=C(O)c3nc(oc3)c8nc(CN=C(O)C(N=C(O)C(N=C(O)c7nc(CN=C(O)CN=C(O)c6nc(CN=C(O)CN=C(O)CN=C(O)C(N=C(O)CN=C(O)CN=C(O)c5nc(c4nc(oc4)CN=C(O)CN=C(O)CN=C(O)CN=C(O)CN=C(O)CN=C(O)CN=C(O)CN=C(O)CN=C(O)CN=C(O)C(N=C(O)CN=C(O)C(N)C(C)C)C(C)CC)sc5)CCC(=N)O)sc6)sc7)CO)CC(=N)O)sc8)CC(=N)O)CO)Cc9cnc[nH]9)C(C)CC
CDXJ01	CSF	Streptococcus suis	[u'RIBOSOMAL']	[u'CLASS_II_LANTIPEPTIDE']	1	88_["A-3802-VI-7"]	0.678571	O=C(O)CCC4NC(=O)C(NC(=O)C6NC(=O)C(NC(=O)C(NC(=O)C1NC(=O)C(NC(=O)C(NC(=O)CNC(=O)C(NC(=O)C(NC(=O)C)CSC1)CO)Cc3c[nH]c2ccccc23)C(C)C)C(C)SCC(NC4(=O))C(=O)NCC(=O)NC5C(=O)NC(C(=O)NC(C(=O)NC(C(=O)NC(C(=O)NC(C(=O)OC)CS(=O)C5(C))C)CSC6(C))C(C)CC)C(C)C)CC(C)C)C(C)CC
LTYC01	VAGINA	Enterococcus sp. HMSC067C01	[u'RIBOSOMAL']	[u'CLASS_II_BACTERIOCIN']	2	62_Bacteriocin enterocin-M	0.842105		MTNFGTKVDAATRSYDNGIYCNNSKCWVNWGEAKENIAGIVISGWASGLAGMGH
ACFR01	SKIN	Staphylococcus capitis SK14	[u'RIBOSOMAL']	[u'CLASS_I_LANTIPEPTIDE']	3	106_["Lanthionine containing peptide","HYICIN M51"]	0.666667	O=C(N)CC5NC(=O)C(NC(=O)C(NC(=O)CNC(=O)C(=CC)NC(=O)C(NC(=O)C(NC(=O)C3NC(=O)CNC(=O)C4N(C(=O)C(NC(=O)C1NC(=O)C(NC(=O)C(NC(=O)C(=C)NC(=O)C(NC(=O)C(=CC)NC(=O)C(N)C(C)CC)CSC1)Cc2ccccc2)CC(C)C)C(C)SC3)CCC4)C)CCCCN)CSCC6NC(=O)C(NC(=O)C(NC5(=O))CSC=CNC6(=O))Cc7ccc(O)cc7)Cc8ccccc8
CDXO01	CSF	Streptococcus suis	[u'RIBOSOMAL']	[u'CLASS_II_LANTIPEPTIDE']	2	88_["A-3802-VI-7"]	0.678571	O=C(O)CCC4NC(=O)C(NC(=O)C6NC(=O)C(NC(=O)C(NC(=O)C1NC(=O)C(NC(=O)C(NC(=O)CNC(=O)C(NC(=O)C(NC(=O)C)CSC1)CO)Cc3c[nH]c2ccccc23)C(C)C)C(C)SCC(NC4(=O))C(=O)NCC(=O)NC5C(=O)NC(C(=O)NC(C(=O)NC(C(=O)NC(C(=O)NC(C(=O)OC)CS(=O)C5(C))C)CSC6(C))C(C)CC)C(C)C)CC(C)C)C(C)CC
AGMX01	ORAL	Streptococcus mutans TCI-86	[u'RIBOSOMAL']	[u'CLASS_II_BACTERIOCIN']	2	69_Antimicrobial protein BL-A60	0.545455		MNTKMMKQFETMDAETLSHVTGGGLYDGANGYAYRDSQGHWAYKVTKTPAQALTDVVVNSWASGAASFAAYA
ALZD01	ORAL	Streptococcus mutans str. B16 P Sm1	[u'RIBOSOMAL']	[u'CLASS_I_LANTIPEPTIDE']	1	187_mutacin I	1	N[C@@H](CC1=CC=CC=C1)C(NC(C(N[C@H](C(N[C@H](C(NC(C(N[C@H]2CC(C)C)=O)=C)=O)CC(C)C)=O)CSC[C@@H](C(N[C@H](C(N[C@H](C(NC3)=O)CC(C)C)=O)CSC[C@@H](C(N[C@H](C(NCC(N[C@H](C(N[C@H](C(N[C@H](C(N4CCC[C@H]4C(N[C@H](C(N[C@@H](CC5=CC=CC=C5)C(N[C@H](C(N[C@H](C(N[C@H]6CC7=CC=C(C=C7)O)=O)CS/C=C\NC8=O)=O)CC(N)=O)=O)=O)CSC[C@@H]8NC6=O)=O)=O)CC(N)=O)=O)CCCCN)=O)C(C)C)=O)=O)[C@@H](C)O)=O)NC3=O)=O)NC2=O)=O)=C)=O
ALZD01	ORAL	Streptococcus mutans str. B16 P Sm1	[u'RIBOSOMAL']	[u'CLASS_II_BACTERIOCIN']	6	69_Antimicrobial protein BL-A60	0.545455		MNTKMMKQFETMDAETLSHVTGGGLYDGANGYAYRDSQGHWAYKVTKTPAQALTDVVVNSWASGAASFAAYA
LTTP01	RESPIRATORY	Enterococcus sp. HMSC065H03	[u'RIBOSOMAL']	[u'CLASS_II_BACTERIOCIN']	1	16_Bacteriocin T8	1		MKKKVLKHCVILGILGTCLAGIGTGIKVDAATYYGNGLYCNKEKCWVDWNQAKGEIGKIIVNGWVNHGPWAPRR
LTTP01	RESPIRATORY	Enterococcus sp. HMSC065H03	[u'RIBOSOMAL']	[u'CLASS_II_BACTERIOCIN']	4	40_Enterocin A	1		MKHLKILSIKETQLIYGGTTHSGKYYGNGVYCTKNKCTVDWAKATTCIAGMSIGGFLGGAIPGKC
ALYT01	ORAL	Streptococcus mutans B07Sm2	[u'RIBOSOMAL']	[u'CLASS_II_LANTIPEPTIDE']	2	129_["streptococcin A-M49"]	0.804348	CCC(C(C(NC(C(NC(C(NC(C(NC(C(NC(C(NC(C(NC(C(NC1C(NC(C(NC(C(NC(C(NC(C(NC(C(N/C2=C\C)=O)C)=O)CC(C)C)=O)Cc3ccccc3)=O)C)=O)CC4=CNc5c4cccc5)=O)=O)CC(N)=O)=O)CC(C)C)=O)Cc6nc[nH]c6)=O)CS7)=O)CCC(O)=O)=O)Cc8nc[nH]c8)=O)CSCC(C(NC(C(NC(C(O)=O)=C)=O)CSC1C)=O)NC2=O)=O)NC(C(C7C)NC(C(NC(C(NC(C(C(C)C)NC(CNC(C(NC(C(NC(CN)=O)CCCCN)=O)CC(N)=O)=O)=O)=O)Cc9ccccc9)=O)CCCCN)=O)=O)C
AUWR01	RESPIRATORY	Mycobacterium sp. UM_WGJ	[u'RIBOSOMAL']	[u'LASSO_PEPTIDE']	6	280_["Promothiocin A]	0.6	O=C(NC(=C)C(=N)O)c3nc4c1nc(oc1C)C(N=C(O)c6nc(C(N=C(O)c2nc(oc2C)CN=C(O)C(N=C(O)c5nc(c4(cc3))sc5)C(C)C)C)sc6)C
LSRA01	VAGINA	Streptococcus pasteurianus	[u'RIBOSOMAL']	[u'CLASS_II_BACTERIOCIN']	3	39_Bacteriocin ubericin-A	0.857143		MNTKTFDQFDVMTDAELSTVEGGKTIYYGNGLYCNANKCWVNWSQTATTIANNSVMNGLTGGNAGWHSGGRA
LFVI01	SKIN	Staphylococcus aureus subsp. aureus	[u'RIBOSOMAL']	[u'CLASS_I_LANTIPEPTIDE']	4	105_["Lanthionine containing peptide","HYICIN M51"]	0.952381	O=C(N)CC5NC(=O)C(NC(=O)C(NC(=O)CNC(=O)C(=CC)NC(=O)C(NC(=O)C(NC(=O)C3NC(=O)CNC(=O)C4N(C(=O)C(NC(=O)C1NC(=O)C(NC(=O)C(=C)NC(=O)C(NC(=O)C(NC(=O)C(=CC)NC(=O)C(N)C(C)CC)CSC1)Cc2ccccc2)CC(C)C)C(C)SC3)CCC4)C)CCCCN)CSCC6NC(=O)C(NC(=O)C(NC5(=O))CSC=CNC6(=O))Cc7ccc(O)cc7)Cc8ccccc8
AFBL01	ORAL	Actinomyces sp. oral taxon 170 str. F0386	[u'RIBOSOMAL']	[u'CLASS_II_LANTIPEPTIDE']	1	126_["Butyrivibriocin OR79"]	0.911111	CCC(C(C(NC(C(N/C(C(NC(C(NC(C(NC(C(O)=O)=C)=O)CS1)=O)CSC2)=O)=C/C)=O)Cc3ccccc3)=O)NC(C(NC(C(NC(C(NC(C(C1C)NC(C(NC(C(NC(C(NC(C(NC(C(NC(C(NC(C2NC(C(C(CC)C)NC(C4NC(C(NC(C(C(CC)C)NC(C(C(C)C)NC(CNC(C(NC(CN)=O)CC(N)=O)=O)=O)=O)=O)CCCCN)=O)=O)=O)=O)Cc5nc[nH]c5)=O)CCC(O)=O)=O)CSC4C)=O)Cc6nc[nH]c6)=O)CCSC)=O)CC(N)=O)=O)=O)CC7=CNc8c7cccc8)=O)CCC(N)=O)=O)Cc9ccccc9)=O)C
LNMW01	STOOL	Enterococcus faecium	[u'RIBOSOMAL']	[u'CLASS_II_BACTERIOCIN']	2	16_Bacteriocin T8	1		MKKKVLKHCVILGILGTCLAGIGTGIKVDAATYYGNGLYCNKEKCWVDWNQAKGEIGKIIVNGWVNHGPWAPRR
CDWE01	CSF	Streptococcus suis	[u'RIBOSOMAL']	[u'CLASS_II_LANTIPEPTIDE']	2	88_["A-3802-VI-7"]	0.678571	O=C(O)CCC4NC(=O)C(NC(=O)C6NC(=O)C(NC(=O)C(NC(=O)C1NC(=O)C(NC(=O)C(NC(=O)CNC(=O)C(NC(=O)C(NC(=O)C)CSC1)CO)Cc3c[nH]c2ccccc23)C(C)C)C(C)SCC(NC4(=O))C(=O)NCC(=O)NC5C(=O)NC(C(=O)NC(C(=O)NC(C(=O)NC(C(=O)NC(C(=O)OC)CS(=O)C5(C))C)CSC6(C))C(C)CC)C(C)C)CC(C)C)C(C)CC
JHDN01	STOOL	Escherichia coli 1-110-08_S3_C1	[u'RIBOSOMAL']	[u'LASSO_PEPTIDE']	5	563_["LARIATIN A"]	0.608696	OC[C@@H](C(N[C@H](C(N[C@H](C(N[C@H](C(N[C@@H](CC1=CC=C(C=C1)O)C(N[C@H](C(N[C@H](C(N[C@@H](CC2=CNC3=C2C=CC=C3)C(N[C@H](C(NCC(N[C@@H](CC4=CN=CN4)C(N[C@H](C(N[C@H](C(N[C@H](C(N[C@@H]([C@H](CC)C)C(N[C@H](C(N5CCC[C@H]5C(O)=O)=O)CCCCN)=O)=O)C(C)C)=O)CC(N)=O)=O)CO)=O)=O)=O)C(C)C)=O)=O)CC6)=O)CCCNC(N)=N)=O)=O)C(C)C)=O)CC(C)C)=O)CCC(N)=O)=O)NC(CNC6=O)=O
LWOU01	SKIN	Brevibacterium sp. HMSC24B04	[u'RIBOSOMAL']	[u'CLASS_III_IV_LANTIPEPTIDE']	2	143_["haloduracin Hal beta"]	0.704545	CC(CC1NC(C(NC(C(C(C)C)NC(C(NC(C(C(C)C)NC(CNC(C(C(C)C)NC(/C(NC(C(NC(C(NC(C2CCCN2C(C(NC(/C(N3)=C\C)=O)CC4=CNc5c4cccc5)=O)=O)CSC(C)C(N)C3=O)=O)C)=O)=C/C)=O)=O)=O)=O)CSCC(C(N6CCCC6C(NC(C(NC(C(NC(C(NC(C(NC(C(NC(C(NC(C(NC(C(O)=O)CS7)=O)CCC(N)=O)=O)=C)=O)C7C)=O)CS8)=O)CCCCN)=O)C(O)C)=O)C8C)=O)=O)NC1=O)=O)=O)C)=O)C
CDSI01	CSF	Streptococcus suis	[u'RIBOSOMAL']	[u'CLASS_II_LANTIPEPTIDE']	2	88_["A-3802-VI-7"]	0.678571	O=C(O)CCC4NC(=O)C(NC(=O)C6NC(=O)C(NC(=O)C(NC(=O)C1NC(=O)C(NC(=O)C(NC(=O)CNC(=O)C(NC(=O)C(NC(=O)C)CSC1)CO)Cc3c[nH]c2ccccc23)C(C)C)C(C)SCC(NC4(=O))C(=O)NCC(=O)NC5C(=O)NC(C(=O)NC(C(=O)NC(C(=O)NC(C(=O)NC(C(=O)OC)CS(=O)C5(C))C)CSC6(C))C(C)CC)C(C)C)CC(C)C)C(C)CC
LOIL01	STOOL	Escherichia coli	[u'RIBOSOMAL']	[u'LINEAR_AZOLE_CONTAINING_PEPTIDE']	2	601_["MccB17","MICROCIN B17","MICROCIN 17W"]	0.943396	O=C(O)C(N=C(O)C(N=C(O)C(N=C(O)CN=C(O)c1nc(oc1)CN=C(O)CN=C(O)c2nc(oc2)CN=C(O)CN=C(O)C(N=C(O)CN=C(O)CN=C(O)c3nc(oc3)c8nc(CN=C(O)C(N=C(O)C(N=C(O)c7nc(CN=C(O)CN=C(O)c6nc(CN=C(O)CN=C(O)CN=C(O)C(N=C(O)CN=C(O)CN=C(O)c5nc(c4nc(oc4)CN=C(O)CN=C(O)CN=C(O)CN=C(O)CN=C(O)CN=C(O)CN=C(O)CN=C(O)CN=C(O)CN=C(O)C(N=C(O)CN=C(O)C(N)C(C)C)C(C)CC)sc5)CCC(=N)O)sc6)sc7)CO)CC(=N)O)sc8)CC(=N)O)CO)Cc9cnc[nH]9)C(C)CC
CEAU01	CSF	Streptococcus suis	[u'RIBOSOMAL']	[u'CLASS_II_LANTIPEPTIDE']	2	88_["A-3802-VI-7"]	0.678571	O=C(O)CCC4NC(=O)C(NC(=O)C6NC(=O)C(NC(=O)C(NC(=O)C1NC(=O)C(NC(=O)C(NC(=O)CNC(=O)C(NC(=O)C(NC(=O)C)CSC1)CO)Cc3c[nH]c2ccccc23)C(C)C)C(C)SCC(NC4(=O))C(=O)NCC(=O)NC5C(=O)NC(C(=O)NC(C(=O)NC(C(=O)NC(C(=O)NC(C(=O)OC)CS(=O)C5(C))C)CSC6(C))C(C)CC)C(C)C)CC(C)C)C(C)CC
CDVW01	CSF	Streptococcus suis	[u'RIBOSOMAL']	[u'CLASS_II_LANTIPEPTIDE']	1	88_["A-3802-VI-7"]	0.678571	O=C(O)CCC4NC(=O)C(NC(=O)C6NC(=O)C(NC(=O)C(NC(=O)C1NC(=O)C(NC(=O)C(NC(=O)CNC(=O)C(NC(=O)C(NC(=O)C)CSC1)CO)Cc3c[nH]c2ccccc23)C(C)C)C(C)SCC(NC4(=O))C(=O)NCC(=O)NC5C(=O)NC(C(=O)NC(C(=O)NC(C(=O)NC(C(=O)NC(C(=O)OC)CS(=O)C5(C))C)CSC6(C))C(C)CC)C(C)C)CC(C)C)C(C)CC
AGKL01	ORAL	Streptococcus mutans TCI-123	[u'RIBOSOMAL']	[u'CLASS_II_BACTERIOCIN']	3	69_Antimicrobial protein BL-A60	0.545455		MNTKMMEQFETMDAETLSHVTGGGLYDGANGYAYRDSQGHWAYKVTKTPAQALTDVVVNSWASGAASFAAYA
CDSO01	CSF	Streptococcus suis	[u'RIBOSOMAL']	[u'CLASS_II_LANTIPEPTIDE']	2	88_["A-3802-VI-7"]	0.678571	O=C(O)CCC4NC(=O)C(NC(=O)C6NC(=O)C(NC(=O)C(NC(=O)C1NC(=O)C(NC(=O)C(NC(=O)CNC(=O)C(NC(=O)C(NC(=O)C)CSC1)CO)Cc3c[nH]c2ccccc23)C(C)C)C(C)SCC(NC4(=O))C(=O)NCC(=O)NC5C(=O)NC(C(=O)NC(C(=O)NC(C(=O)NC(C(=O)NC(C(=O)OC)CS(=O)C5(C))C)CSC6(C))C(C)CC)C(C)C)CC(C)C)C(C)CC
AGMW01	ORAL	Streptococcus mutans TCI-85	[u'RIBOSOMAL']	[u'CLASS_II_BACTERIOCIN']	2	69_Antimicrobial protein BL-A60	0.545455		MNTRMMEQFETMDAETLSHVTGGGLYDGANGYAYRDSQGHWAYKVTKTPAQALTDVVVNSWASGAASFAAYA
LNLU01	STOOL	Enterococcus faecium	[u'RIBOSOMAL']	[u'CLASS_II_BACTERIOCIN']	1	16_Bacteriocin T8	1		MKKKVLKHCVILGILGTCLAGIGTGIKVDAATYYGNGLYCNKEKCWVDWNQAKGEIGKIIVNGWVNHGPWAPRR
LNLU01	STOOL	Enterococcus faecium	[u'RIBOSOMAL']	[u'CLASS_II_BACTERIOCIN']	2	40_Enterocin A	1		MKHLKILSIKETQLIYGGTTHSGKYYGNGVYCTKNKCTVDWAKATTCIAGMSIGGFLGGAIPGKC
LTMR01	SKIN	Staphylococcus sp. HMSC36D07	[u'RIBOSOMAL']	[u'BACTERIAL_HEAD_TO_TAIL_CYCLIZED']	2	595_Syanodin I	0.590909	CC(C[C@@H](C(N[C@H](C(NCC(O)=O)=O)C)=O)NC(CNC([C@@H](NC(CNC([C@@H](NC([C@@H]1CCCN1C([C@@H](NC([C@@H]2CC(NCC(N[C@H](C(N[C@H](C(NCC(NCC(N[C@H](C(N[C@H](C(N2)=O)C(C)C)=O)[C@H](O)C)=O)=O)=O)CO)=O)CC(C)C)=O)=O)=O)C)=O)=O)C)=O)=O)CCC(N)=O)=O)=O)C
JPDQ01	URINE	Enterococcus faecalis Efa HS0914	[u'RIBOSOMAL']	[u'CLASS_II_LANTIPEPTIDE']	1	138_["Cytolysin LL"]	1	NC(C(N/C(C(N1CCCC1C(NC(C(NC(CS2)C(NC(C)C(NC(C(NC(C)C(NC(C)C(N/C(C(NC(C)C(NC(C)C(NC(C)C(NC(C(NC(C(NC(C)C(NC3C)=O)=O)=C)=O)CSCC(C(NCC(NC(CC4=CNC5=C4C=CC=C5)C(NC(C(NCC(NCC(NCC(NC(C(CC)C)C(NC(CC6=CC=CC=C6)C(NC(C(NCC(NC(C(N/C(C(NC(C(NC(C(NC(C(NC(C(NC(C(NC(C(NC7CC8=CN=CN8)=O)CCCCN)=O)CC(C)C)=O)CSCC(C(O)=O)NC7=O)=O)C(C)C)=O)C(C)C)=O)C(C)C)=O)=C/C)=O)C(C)C)=O)=O)C(C)O)=O)=O)=O)=O)=O)=O)C(C)C)=O)=O)=O)NC3…
AGLL01	ORAL	Streptococcus mutans TCI-210	[u'RIBOSOMAL']	[u'CLASS_II_BACTERIOCIN']	2	69_Antimicrobial protein BL-A60	0.545455		MLVDILTIKKGGIHMNTRMMEQFETMDAETLSHVTGGGLYDGANGYAYRDSQGHWAYKVTKTPAQALTDVVVNSWASGAASFAAYA
AHRU01	ORAL	Streptococcus mutans 5SM3	[u'RIBOSOMAL']	[u'CLASS_II_BACTERIOCIN']	6	69_Antimicrobial protein BL-A60	0.545455		MNTRMMEQFETMDAETLSHVTGGGLYDGANGYAYRDSQGHWAYKVTKTPAQALTDVVVNSWASGAASFAAYA
JGYL01	STOOL	Bifidobacterium angulatum	[u'RIBOSOMAL']	[u'CLASS_II_LANTIPEPTIDE']	1	143_["haloduracin Hal beta"]	0.704545	CC(CC1NC(C(NC(C(C(C)C)NC(C(NC(C(C(C)C)NC(CNC(C(C(C)C)NC(/C(NC(C(NC(C(NC(C2CCCN2C(C(NC(/C(N3)=C\C)=O)CC4=CNc5c4cccc5)=O)=O)CSC(C)C(N)C3=O)=O)C)=O)=C/C)=O)=O)=O)=O)CSCC(C(N6CCCC6C(NC(C(NC(C(NC(C(NC(C(NC(C(NC(C(NC(C(NC(C(O)=O)CS7)=O)CCC(N)=O)=O)=C)=O)C7C)=O)CS8)=O)CCCCN)=O)C(O)C)=O)C8C)=O)=O)NC1=O)=O)=O)C)=O)C
LTMQ01	SKIN	Staphylococcus sp. HMSC36D12	[u'RIBOSOMAL']	[u'CLASS_I_LANTIPEPTIDE']	3	105_["Lanthionine containing peptide","HYICIN M51"]	0.952381	O=C(N)CC5NC(=O)C(NC(=O)C(NC(=O)CNC(=O)C(=CC)NC(=O)C(NC(=O)C(NC(=O)C3NC(=O)CNC(=O)C4N(C(=O)C(NC(=O)C1NC(=O)C(NC(=O)C(=C)NC(=O)C(NC(=O)C(NC(=O)C(=CC)NC(=O)C(N)C(C)CC)CSC1)Cc2ccccc2)CC(C)C)C(C)SC3)CCC4)C)CCCCN)CSCC6NC(=O)C(NC(=O)C(NC5(=O))CSC=CNC6(=O))Cc7ccc(O)cc7)Cc8ccccc8
JPGW01	ORAL	Streptococcus mitis	[u'RIBOSOMAL']	[u'CLASS_II_LANTIPEPTIDE']	2	127_["VARIACIN"]	0.888889	CCC(C(C(NC(C(NC(C(NC(C(NC(C(NC(C(NC(C(NC(C(NC(C(NC(C(NC(C(NC(C(NC(C(NC(C(N/C1=C/C)=O)Cc2ccccc2)=O)C(C)C)=O)Cc3ccccc3)=O)CCC(N)=O)=O)Cc4ccccc4)=O)CSCC(C(NC(C(O)=O)=C)=O)NC5=O)=O)CC(N)=O)=O)CCSC)=O)Cc6nc[nH]c6)=O)CS7)=O)CCC(O)=O)=O)Cc8nc[nH]c8)=O)CSCC5NC1=O)=O)NC(C(C7C)NC(C9CCCN9C(C(C(CC)C)NC(C(C(C)C)NC(CNC(C(NC(CN)=O)=C)=O)=O)=O)=O)=O)=O)C
AGLJ01	ORAL	Streptococcus mutans TCI-202	[u'RIBOSOMAL']	[u'CLASS_II_BACTERIOCIN']	2	69_Antimicrobial protein BL-A60	0.545455		MNTRMMEQFETMDAETLSHVTGGGLYDGANGYAYRDSQGHWAYKVTKTPAQALTDVVVNSWASGAASFAAYA
AHRK01	ORAL	Streptococcus mutans 1SM1	[u'RIBOSOMAL']	[u'CLASS_II_BACTERIOCIN']	8	69_Antimicrobial protein BL-A60	0.545455		MLVDILTIKKGGIHMNTKMMEQFETMDAETLSHVTGGGLYDGANGYAYRDSQGHWAYKVTKTPAQALTDVVVNSWASGAASFAAYA
LKUR01	GI	Bifidobacterium bifidum	[u'RIBOSOMAL']	[u'CLASS_III_IV_LANTIPEPTIDE', u'LASSO_PEPTIDE']	1	576_["CHAXAPEPTIN"]	0.6	OC[C@@H](C(N[C@H](C(N1CCC[C@H]1C(N[C@H](C(N[C@@H](C2)C(N[C@H](C(N[C@@H](CC3=CC=CC=C3)C(NCC(N[C@H](C(N[C@H](C(N[C@@H](CC4=CC=CC=C4)C(N[C@@H](CC5=CC=CC=C5)C(O)=O)=O)=O)CC(N)=O)=O)CC(C)C)=O)=O)=O)CO)=O)=O)CC(C)C)=O)=O)CCCCN)=O)NC(CNC([C@H](CC6=CC=CC=C6)NC(CNC2=O)=O)=O)=O
AVPR01	RESPIRATORY	Staphylococcus aureus HST-077	[u'RIBOSOMAL']	[u'CLASS_I_LANTIPEPTIDE']	4	105_["Lanthionine containing peptide","HYICIN M51"]	0.952381	O=C(N)CC5NC(=O)C(NC(=O)C(NC(=O)CNC(=O)C(=CC)NC(=O)C(NC(=O)C(NC(=O)C3NC(=O)CNC(=O)C4N(C(=O)C(NC(=O)C1NC(=O)C(NC(=O)C(=C)NC(=O)C(NC(=O)C(NC(=O)C(=CC)NC(=O)C(N)C(C)CC)CSC1)Cc2ccccc2)CC(C)C)C(C)SC3)CCC4)C)CCCCN)CSCC6NC(=O)C(NC(=O)C(NC5(=O))CSC=CNC6(=O))Cc7ccc(O)cc7)Cc8ccccc8
LWMX01	URINE	Nosocomiicoccus sp. HMSC09A07	[u'RIBOSOMAL']	[u'CLASS_III_IV_LANTIPEPTIDE']	1	204_Prochlorosin 4.3	0.636364	O=C(C(N[C@@H](C)C(N[C@H](C(NCC(NC1)=O)=O)CSC[C@@H](C(N[C@@H](CC(O)=O)C(N[C@H](C(N[C@H](C(N[C@@H](CCSC)C(N[C@@H](CC2=CC=CC=C2)C(N[C@@H](CS3)C(N[C@@H](CC4=CC=C(C=C4)O)C(O)=O)=O)=O)=O)=O)CO)=O)C3C)=O)=O)NC1=O)=O)=O)CC
JOSM01	STOOL	Escherichia coli 2-222-05_S3_C1	[u'RIBOSOMAL']	[u'LASSO_PEPTIDE']	1	563_["LARIATIN A"]	0.608696	OC[C@@H](C(N[C@H](C(N[C@H](C(N[C@H](C(N[C@@H](CC1=CC=C(C=C1)O)C(N[C@H](C(N[C@H](C(N[C@@H](CC2=CNC3=C2C=CC=C3)C(N[C@H](C(NCC(N[C@@H](CC4=CN=CN4)C(N[C@H](C(N[C@H](C(N[C@H](C(N[C@@H]([C@H](CC)C)C(N[C@H](C(N5CCC[C@H]5C(O)=O)=O)CCCCN)=O)=O)C(C)C)=O)CC(N)=O)=O)CO)=O)=O)=O)C(C)C)=O)=O)CC6)=O)CCCNC(N)=N)=O)=O)C(C)C)=O)CC(C)C)=O)CCC(N)=O)=O)NC(CNC6=O)=O
AHRW01	ORAL	Streptococcus mutans NVAB	[u'RIBOSOMAL']	[u'CLASS_II_BACTERIOCIN']	1	69_Antimicrobial protein BL-A60	0.545455		MLVDILTIKKGGIHMNTRMMEQFETMDAETLSHVTGGGLYDGANGYAYRDSQGHWAYKVTKTPAQALTDVVVNSWASGAASFAAYA
AGMB01	ORAL	Streptococcus mutans TCI-256	[u'RIBOSOMAL']	[u'CLASS_II_BACTERIOCIN']	3	69_Antimicrobial protein BL-A60	0.545455		MLVDILTIKKGGIHMNTKMMEQFETMDAETLSHVTGGGLYDGANGYAYRDSQGHWAYKVTKTPAQALTDVVVNSWASGAASFAAYA
AHSN01	ORAL	Streptococcus mutans NV1996	[u'RIBOSOMAL']	[u'CLASS_II_BACTERIOCIN']	6	69_Antimicrobial protein BL-A60	0.545455		MNTKMMEQFETMDTETLSHVTGGGLYDGANGYAYRDSQGHWAYKVTKTPAQALTDVVVNSWASGAASFAAYA
CDUD01	CSF	Streptococcus suis	[u'RIBOSOMAL']	[u'CLASS_II_LANTIPEPTIDE']	1	88_["A-3802-VI-7"]	0.678571	O=C(O)CCC4NC(=O)C(NC(=O)C6NC(=O)C(NC(=O)C(NC(=O)C1NC(=O)C(NC(=O)C(NC(=O)CNC(=O)C(NC(=O)C(NC(=O)C)CSC1)CO)Cc3c[nH]c2ccccc23)C(C)C)C(C)SCC(NC4(=O))C(=O)NCC(=O)NC5C(=O)NC(C(=O)NC(C(=O)NC(C(=O)NC(C(=O)NC(C(=O)OC)CS(=O)C5(C))C)CSC6(C))C(C)CC)C(C)C)CC(C)C)C(C)CC
BCYF01	STOOL	Bifidobacterium longum subsp. infantis	[u'RIBOSOMAL']	[u'CLASS_II_LANTIPEPTIDE']	2	88_["A-3802-VI-7"]	0.892857	O=C(O)CCC4NC(=O)C(NC(=O)C6NC(=O)C(NC(=O)C(NC(=O)C1NC(=O)C(NC(=O)C(NC(=O)CNC(=O)C(NC(=O)C(NC(=O)C)CSC1)CO)Cc3c[nH]c2ccccc23)C(C)C)C(C)SCC(NC4(=O))C(=O)NCC(=O)NC5C(=O)NC(C(=O)NC(C(=O)NC(C(=O)NC(C(=O)NC(C(=O)OC)CS(=O)C5(C))C)CSC6(C))C(C)CC)C(C)C)CC(C)C)C(C)CC
AGMY01	ORAL	Streptococcus mutans TCI-92	[u'RIBOSOMAL']	[u'CLASS_II_BACTERIOCIN']	2	69_Antimicrobial protein BL-A60	0.545455		MNTKMMEQFETMDAETLSHVTGGGLYDGANGYAYRDSQGHWAYKVTKTPAQALTDVVVNSWASGAASFAAYA
JSOI01	URINE	Escherichia coli	[u'RIBOSOMAL']	[u'LASSO_PEPTIDE']	4	563_["LARIATIN A"]	0.608696	OC[C@@H](C(N[C@H](C(N[C@H](C(N[C@H](C(N[C@@H](CC1=CC=C(C=C1)O)C(N[C@H](C(N[C@H](C(N[C@@H](CC2=CNC3=C2C=CC=C3)C(N[C@H](C(NCC(N[C@@H](CC4=CN=CN4)C(N[C@H](C(N[C@H](C(N[C@H](C(N[C@@H]([C@H](CC)C)C(N[C@H](C(N5CCC[C@H]5C(O)=O)=O)CCCCN)=O)=O)C(C)C)=O)CC(N)=O)=O)CO)=O)=O)=O)C(C)C)=O)=O)CC6)=O)CCCNC(N)=N)=O)=O)C(C)C)=O)CC(C)C)=O)CCC(N)=O)=O)NC(CNC6=O)=O
CTEM01	SKIN	Staphylococcus capitis	[u'RIBOSOMAL']	[u'CLASS_I_LANTIPEPTIDE']	1	106_["Lanthionine containing peptide","HYICIN M51"]	0.666667	O=C(N)CC5NC(=O)C(NC(=O)C(NC(=O)CNC(=O)C(=CC)NC(=O)C(NC(=O)C(NC(=O)C3NC(=O)CNC(=O)C4N(C(=O)C(NC(=O)C1NC(=O)C(NC(=O)C(NC(=O)C(=C)NC(=O)C(NC(=O)C(=CC)NC(=O)C(N)C(C)CC)CSC1)Cc2ccccc2)CC(C)C)C(C)SC3)CCC4)C)CCCCN)CSCC6NC(=O)C(NC(=O)C(NC5(=O))CSC=CNC6(=O))Cc7ccc(O)cc7)Cc8ccccc8
LRGN01	SKIN	Streptococcus pyogenes	[u'RIBOSOMAL']	[u'LINEAR_AZOLE_CONTAINING_PEPTIDE']	1	600_["PLANTAZOLICIN B"]	0.789474	O=C(O)C(N=C(O)C1N=C(OC1(C))c2nc(oc2)c3nc(oc3)c4nc(oc4)c5nc(oc5)C(N=C(O)C(N=C(O)c6nc(oc6C)c7nc(oc7C)c%10nc(c8nc(oc8C)c9nc(C(N)CCCNC(=N)N)sc9)sc%10)C(C)CC)C(C)CC)Cc%11ccccc%11
LRGN01	SKIN	Streptococcus pyogenes	[u'RIBOSOMAL']	[u'BACTERIAL_HEAD_TO_TAIL_CYCLIZED', u'CLASS_II_BACTERIOCIN']	2	568_["XANTHOMONIN I"]	0.619048		MTTMKELTINDMASISGGNAPGDAVIGGLGGLASGLKFCKLPHPVLTGGCVVGFTVGGAYLGYTAN
LRGN01	SKIN	Streptococcus pyogenes	[u'RIBOSOMAL']	[u'CLASS_II_LANTIPEPTIDE']	5	121_["SALIVARICIN A"]	0.9375	CCC(C(C(NC(C(NC(C(NC(C(NC(C(NC(C(NC(C(NC(C(N1CCCC1C(NC(C(NC(C(NC(C(NC(C(NC(C(NC2CS3)=O)C(C)C)=O)Cc4ccccc4)=O)C(C)C)=O)CSCC(C(O)=O)NC2=O)=O)CC(N)=O)=O)=O)CS5)=O)CC(O)=O)=O)CC(O)=O)=O)C3C)=O)C(CC)C)=O)C5C)=O)C)=O)NC(C(NC(CNC(C(NC(CNC(C(NC(C(CCCCN)N)=O)CCCNC(N)=N)=O)=O)CO)=O)=O)CC6=CNc7c6cccc7)=O)C
LRGU01	SKIN	Streptococcus pyogenes	[u'RIBOSOMAL']	[u'CLASS_II_LANTIPEPTIDE']	1	121_["SALIVARICIN A"]	0.9375	CCC(C(C(NC(C(NC(C(NC(C(NC(C(NC(C(NC(C(NC(C(N1CCCC1C(NC(C(NC(C(NC(C(NC(C(NC(C(NC2CS3)=O)C(C)C)=O)Cc4ccccc4)=O)C(C)C)=O)CSCC(C(O)=O)NC2=O)=O)CC(N)=O)=O)=O)CS5)=O)CC(O)=O)=O)CC(O)=O)=O)C3C)=O)C(CC)C)=O)C5C)=O)C)=O)NC(C(NC(CNC(C(NC(CNC(C(NC(C(CCCCN)N)=O)CCCNC(N)=N)=O)=O)CO)=O)=O)CC6=CNc7c6cccc7)=O)C
LRGU01	SKIN	Streptococcus pyogenes	[u'RIBOSOMAL']	[u'LINEAR_AZOLE_CONTAINING_PEPTIDE']	2	600_["PLANTAZOLICIN B"]	0.789474	O=C(O)C(N=C(O)C1N=C(OC1(C))c2nc(oc2)c3nc(oc3)c4nc(oc4)c5nc(oc5)C(N=C(O)C(N=C(O)c6nc(oc6C)c7nc(oc7C)c%10nc(c8nc(oc8C)c9nc(C(N)CCCNC(=N)N)sc9)sc%10)C(C)CC)C(C)CC)Cc%11ccccc%11
AHSW01	ORAL	Streptococcus mutans NLML1	[u'RIBOSOMAL']	[u'CLASS_II_BACTERIOCIN']	4	69_Antimicrobial protein BL-A60	0.545455		T*DFLTSTTGVNNYKSLTNDELSEVFGGDKQAADTFLSAVGGAASGFTYCASNGVWHPYILAGCAGVGAVGSVVFPH
AHSW01	ORAL	Streptococcus mutans NLML1	[u'RIBOSOMAL']	[u'CLASS_II_BACTERIOCIN']	7	69_Antimicrobial protein BL-A60	0.545455		MLVDILTIKKGGIHMNTRMMEQFETMDAETLSHVTGGGLYDGANGYAYRDSQGHWAYKVTKTPAQALTDVVVNSWASGAASFAAYA
JGSP01	URINE	Staphylococcus aureus DAR1874	[u'RIBOSOMAL']	[u'BACTERIAL_HEAD_TO_TAIL_CYCLIZED']	2	595_Syanodin I	0.590909	CC(C[C@@H](C(N[C@H](C(NCC(O)=O)=O)C)=O)NC(CNC([C@@H](NC(CNC([C@@H](NC([C@@H]1CCCN1C([C@@H](NC([C@@H]2CC(NCC(N[C@H](C(N[C@H](C(NCC(NCC(N[C@H](C(N[C@H](C(N2)=O)C(C)C)=O)[C@H](O)C)=O)=O)=O)CO)=O)CC(C)C)=O)=O)=O)C)=O)=O)C)=O)=O)CCC(N)=O)=O)=O)C
LUWI01	GI	Lactobacillus plantarum	[u'RIBOSOMAL']	[u'CLASS_II_BACTERIOCIN']	2	54_Plantaricin F	1		MKIKLTVLNEFEELTADAEKNISGGRRSRKNGIGYAIGYAFGAVERAVLGGSRDYNK
LNLA01	STOOL	Enterococcus faecium	[u'RIBOSOMAL']	[u'CLASS_II_BACTERIOCIN']	3	16_Bacteriocin T8	1		MKKKVLKHCVILGILGTCLAGIGTGIKVDAATYYGNGLYCNKEKCWVDWNQAKGEIGKIIVNGWVNHGPWAPRR
LNLA01	STOOL	Enterococcus faecium	[u'RIBOSOMAL']	[u'CLASS_II_BACTERIOCIN']	4	40_Enterocin A	1		MKHLKILSIKETQLIYGGTTHSGKYYGNGVYCTKNKCTVDWAKATTCIAGMSIGGFLGGAIPGKC
CDWL01	CSF	Streptococcus suis	[u'RIBOSOMAL']	[u'CLASS_II_LANTIPEPTIDE']	2	88_["A-3802-VI-7"]	0.678571	O=C(O)CCC4NC(=O)C(NC(=O)C6NC(=O)C(NC(=O)C(NC(=O)C1NC(=O)C(NC(=O)C(NC(=O)CNC(=O)C(NC(=O)C(NC(=O)C)CSC1)CO)Cc3c[nH]c2ccccc23)C(C)C)C(C)SCC(NC4(=O))C(=O)NCC(=O)NC5C(=O)NC(C(=O)NC(C(=O)NC(C(=O)NC(C(=O)NC(C(=O)OC)CS(=O)C5(C))C)CSC6(C))C(C)CC)C(C)C)CC(C)C)C(C)CC
MBLH01	VAGINA	Streptococcus agalactiae	[u'RIBOSOMAL']	[u'CLASS_I_LANTIPEPTIDE']	3	148_["NISIN U"]	0.941176	CCC(C(C(N/C(C(NC(C(NC(C(NC(C(NC1CC(C)C)=O)=C)=O)CCCCN)=O)CSCC(C(NC(C(N2CCCC2C(NCC(NC(C(NC(C(NC(C(NCC(NC(C(NC(C(NC(C(N/C(C(NC(C(N3CCCC3C(NC(C(NC(C(NC(C(NC(C(NC(C(NC(C(NCC(NC(C(NC(C(NC(C(NCC(O)=O)=O)Cc4ccccc4)=O)Cc5nc[nH]c5)=O)CS6)=O)=O)CS7)=O)C6C)=O)C)=O)C7C)=O)CCCCN)=O)CC(C)C)=O)=O)CS8)=O)=C\C)=O)CCSC)=O)CC(C)C)=O)C(CC)C)=O)=O)C8C)=O)CCCCN)=O)CS9)=O)=O)=O)C9C)=O)NC1=O)=O)=C\C)=O)N)C
AGLS01	ORAL	Streptococcus mutans TCI-224	[u'RIBOSOMAL']	[u'CLASS_II_BACTERIOCIN']	2	69_Antimicrobial protein BL-A60	0.545455		MLVDILTIKKGGIHMNTRMMEQFETMDAETLSHVTGGGLYDGANGYAYRDSQGHWAYKVTKTPAQALTDVVVNSWASGAASFAAYA
LNUN01	SKIN	Staphylococcus epidermidis	[u'RIBOSOMAL']	[u'BACTERIAL_HEAD_TO_TAIL_CYCLIZED']	2	73_Bacteriocin uberolysin	0.626667	CC(C)C[C@@H](C(N[C@@H](C)C(NCC(N[C@@H](CC1=CC=C(C=C1)O)C(N[C@H](C(NCC(N[C@@H]([C@H](CC)C)C(N[C@@H](C)C(N[C@H](C(NCC(N[C@H](C(N[C@@H](C)C(N[C@H](C(N[C@H](C(N[C@H](C(N[C@H](C(N[C@@H](CC(O)=O)C(N[C@@H](C)C(N[C@@H]([C@H](CC)C)C(N[C@@H](CC(O)=O)C(N[C@H](C(NCC(N[C@@H](C)C(N[C@@H](C)C(N[C@@H](C)C(N[C@@H](CC2=CC=CC=C2)C(N[C@H](C(N[C@@H]([C@H](CC)C)C(N[C@@H]([C@H](CC)C)C(N[C@H](C(N[C@@H]([C@H](CC)C)C(N[C@…
LFEB02	SKIN	Staphylococcus aureus	[u'RIBOSOMAL']	[u'BACTERIAL_HEAD_TO_TAIL_CYCLIZED']	2	595_Syanodin I	0.590909	CC(C[C@@H](C(N[C@H](C(NCC(O)=O)=O)C)=O)NC(CNC([C@@H](NC(CNC([C@@H](NC([C@@H]1CCCN1C([C@@H](NC([C@@H]2CC(NCC(N[C@H](C(N[C@H](C(NCC(NCC(N[C@H](C(N[C@H](C(N2)=O)C(C)C)=O)[C@H](O)C)=O)=O)=O)CO)=O)CC(C)C)=O)=O)=O)C)=O)=O)C)=O)=O)CCC(N)=O)=O)=O)C
LFEB02	SKIN	Staphylococcus aureus	[u'RIBOSOMAL']	[u'CLASS_I_LANTIPEPTIDE']	4	105_["Lanthionine containing peptide","HYICIN M51"]	0.952381	O=C(N)CC5NC(=O)C(NC(=O)C(NC(=O)CNC(=O)C(=CC)NC(=O)C(NC(=O)C(NC(=O)C3NC(=O)CNC(=O)C4N(C(=O)C(NC(=O)C1NC(=O)C(NC(=O)C(=C)NC(=O)C(NC(=O)C(NC(=O)C(=CC)NC(=O)C(N)C(C)CC)CSC1)Cc2ccccc2)CC(C)C)C(C)SC3)CCC4)C)CCCCN)CSCC6NC(=O)C(NC(=O)C(NC5(=O))CSC=CNC6(=O))Cc7ccc(O)cc7)Cc8ccccc8
JNMI01	STOOL	Escherichia coli 3-373-03_S1_C2	[u'RIBOSOMAL']	[u'LINEAR_AZOLE_CONTAINING_PEPTIDE']	4	601_["MccB17","MICROCIN B17","MICROCIN 17W"]	0.867925	O=C(O)C(N=C(O)C(N=C(O)C(N=C(O)CN=C(O)c1nc(oc1)CN=C(O)CN=C(O)c2nc(oc2)CN=C(O)CN=C(O)C(N=C(O)CN=C(O)CN=C(O)c3nc(oc3)c8nc(CN=C(O)C(N=C(O)C(N=C(O)c7nc(CN=C(O)CN=C(O)c6nc(CN=C(O)CN=C(O)CN=C(O)C(N=C(O)CN=C(O)CN=C(O)c5nc(c4nc(oc4)CN=C(O)CN=C(O)CN=C(O)CN=C(O)CN=C(O)CN=C(O)CN=C(O)CN=C(O)CN=C(O)CN=C(O)C(N=C(O)CN=C(O)C(N)C(C)C)C(C)CC)sc5)CCC(=N)O)sc6)sc7)CO)CC(=N)O)sc8)CC(=N)O)CO)Cc9cnc[nH]9)C(C)CC
LFVE01	SKIN	Staphylococcus aureus subsp. aureus	[u'RIBOSOMAL']	[u'CLASS_I_LANTIPEPTIDE']	4	105_["Lanthionine containing peptide","HYICIN M51"]	0.952381	O=C(N)CC5NC(=O)C(NC(=O)C(NC(=O)CNC(=O)C(=CC)NC(=O)C(NC(=O)C(NC(=O)C3NC(=O)CNC(=O)C4N(C(=O)C(NC(=O)C1NC(=O)C(NC(=O)C(=C)NC(=O)C(NC(=O)C(NC(=O)C(=CC)NC(=O)C(N)C(C)CC)CSC1)Cc2ccccc2)CC(C)C)C(C)SC3)CCC4)C)CCCCN)CSCC6NC(=O)C(NC(=O)C(NC5(=O))CSC=CNC6(=O))Cc7ccc(O)cc7)Cc8ccccc8
LTAK01	ORAL	Streptococcus mutans	[u'RIBOSOMAL']	[u'CLASS_I_LANTIPEPTIDE']	1	113_["MUTACIN 1140","MUTICIN 1140"]	1	O=C(NC(C(=O)NC7C(=O)NC(C(=O)NC(C(=O)NC(=CC)C(=O)N6CCCC6(C(=O)NCC(=O)NC5C(=O)NC(C(=O)NC(C(=O)NC(C(=O)NCC(=O)NC2C(=O)NC(C(=O)NC(C(=O)NC1C(=O)NC(C(=O)NC(C(=O)NC=CSC1)CSC2)Cc3ccc(O)cc3)CC(=O)N)Cc4ccccc4)C(C)SC5)CCCNC(=N)N)C))CSC7)CC(C)C)Cc9c[nH]c8ccccc89)C(=C)NC(=O)C(NC(=O)C(N)Cc%10ccccc%10)CCCCN
LTAK01	ORAL	Streptococcus mutans	[u'RIBOSOMAL']	[u'CLASS_II_LANTIPEPTIDE']	2	193_Smb B	1	N[C@@H]([C@H](CC)C)C(NCC(N/C(C(N/C(C(N[C@H](C(N[C@H](C(N[C@H](C(NC(C(N/C(C(N[C@@H](CC1=CC=CC=C1)C(N[C@H](C(N[C@@H]([C@H](CC)C)C(N[C@H](C(N[C@H](C(NCC(N[C@H](C(N[C@H](C(NCC(N[C@@H](CC2=CC=C(C=C2)O)C(N[C@H]3[C@H](CC)C)=O)=O)=O)CCCCN)=O)CC(N)=O)=O)=O)CC(C)C)=O)C(C)C)=O)=O)CSC[C@@H](C(N[C@H](C(N[C@H](C(N[C@H](C(N[C@H](C(N[C@H](C(N[C@@H](CS4)C(N[C@@H](CCSC)C(N[C@H](C(N[C@H](C(N[C@@H](CS5)C(NC(C(N[C@H]…
LTAK01	ORAL	Streptococcus mutans	[u'RIBOSOMAL']	[u'CLASS_II_LANTIPEPTIDE']	4	129_["streptococcin A-M49"]	0.804348	CCC(C(C(NC(C(NC(C(NC(C(NC(C(NC(C(NC(C(NC(C(NC1C(NC(C(NC(C(NC(C(NC(C(NC(C(N/C2=C\C)=O)C)=O)CC(C)C)=O)Cc3ccccc3)=O)C)=O)CC4=CNc5c4cccc5)=O)=O)CC(N)=O)=O)CC(C)C)=O)Cc6nc[nH]c6)=O)CS7)=O)CCC(O)=O)=O)Cc8nc[nH]c8)=O)CSCC(C(NC(C(NC(C(O)=O)=C)=O)CSC1C)=O)NC2=O)=O)NC(C(C7C)NC(C(NC(C(NC(C(C(C)C)NC(CNC(C(NC(C(NC(CN)=O)CCCCN)=O)CC(N)=O)=O)=O)=O)Cc9ccccc9)=O)CCCCN)=O)=O)C
LTAK01	ORAL	Streptococcus mutans	[u'RIBOSOMAL']	[u'CLASS_II_BACTERIOCIN']	6	69_Antimicrobial protein BL-A60	0.545455		MNTKMMEQFETMDAETLSHVTGGGLYDGANGYAYRDSQGHWAYKVTKTPAQALTDVVVNSWASGAASFAAYA
AVAM01	RESPIRATORY	Burkholderia pseudomallei HBPUB10303a	[u'RIBOSOMAL']	[u'LASSO_PEPTIDE']	27	561_["CAPISTRUIN"]	0.875	O[C@H](C)[C@@H](C(N1CCC[C@H]1C(NCC(N[C@@H](CC2=CC=CC=C2)C(N[C@H](C(N[C@H](C(N3CCC[C@H]3C(N[C@@H](C4)C(N[C@@H](C)C(N[C@H](C(N[C@H](C(N[C@@H]([C@H](CC)C)C(N[C@H](C(N[C@H](C(N[C@@H](CC5=CC=CC=C5)C(NCC(N[C@@H](CC6=CC=CC=C6)C(N[C@H](C(O)=O)CC(N)=O)=O)=O)=O)=O)CCCNC(N)=N)=O)CO)=O)=O)C(C)C)=O)CCCNC(N)=N)=O)=O)=O)=O)[C@@H](C)O)=O)CCC(N)=O)=O)=O)=O)=O)NC(CNC4=O)=O
AOGU01	RESPIRATORY	Burkholderia pseudomallei MSHR1043	[u'RIBOSOMAL']	[u'LASSO_PEPTIDE']	2	561_["CAPISTRUIN"]	1	O[C@H](C)[C@@H](C(N1CCC[C@H]1C(NCC(N[C@@H](CC2=CC=CC=C2)C(N[C@H](C(N[C@H](C(N3CCC[C@H]3C(N[C@@H](C4)C(N[C@@H](C)C(N[C@H](C(N[C@H](C(N[C@@H]([C@H](CC)C)C(N[C@H](C(N[C@H](C(N[C@@H](CC5=CC=CC=C5)C(NCC(N[C@@H](CC6=CC=CC=C6)C(N[C@H](C(O)=O)CC(N)=O)=O)=O)=O)=O)CCCNC(N)=N)=O)CO)=O)=O)C(C)C)=O)CCCNC(N)=N)=O)=O)=O)=O)[C@@H](C)O)=O)CCC(N)=O)=O)=O)=O)=O)NC(CNC4=O)=O
AGMG01	ORAL	Streptococcus mutans TCI-278	[u'RIBOSOMAL']	[u'CLASS_II_BACTERIOCIN']	3	69_Antimicrobial protein BL-A60	0.545455		MNTRMMEQFETMDAETLSHVTGGGLYDGANGYAYRDSQGHWAYKVTKTPAQALTDVVVNSWASGAASFAAYA
LTMV01	RESPIRATORY	Staphylococcus sp. HMSC35D08	[u'RIBOSOMAL']	[u'CLASS_I_LANTIPEPTIDE']	3	105_["Lanthionine containing peptide","HYICIN M51"]	0.952381	O=C(N)CC5NC(=O)C(NC(=O)C(NC(=O)CNC(=O)C(=CC)NC(=O)C(NC(=O)C(NC(=O)C3NC(=O)CNC(=O)C4N(C(=O)C(NC(=O)C1NC(=O)C(NC(=O)C(=C)NC(=O)C(NC(=O)C(NC(=O)C(=CC)NC(=O)C(N)C(C)CC)CSC1)Cc2ccccc2)CC(C)C)C(C)SC3)CCC4)C)CCCCN)CSCC6NC(=O)C(NC(=O)C(NC5(=O))CSC=CNC6(=O))Cc7ccc(O)cc7)Cc8ccccc8
LTMV01	RESPIRATORY	Staphylococcus sp. HMSC35D08	[u'RIBOSOMAL']	[u'BACTERIAL_HEAD_TO_TAIL_CYCLIZED']	6	595_Syanodin I	0.590909	CC(C[C@@H](C(N[C@H](C(NCC(O)=O)=O)C)=O)NC(CNC([C@@H](NC(CNC([C@@H](NC([C@@H]1CCCN1C([C@@H](NC([C@@H]2CC(NCC(N[C@H](C(N[C@H](C(NCC(NCC(N[C@H](C(N[C@H](C(N2)=O)C(C)C)=O)[C@H](O)C)=O)=O)=O)CO)=O)CC(C)C)=O)=O)=O)C)=O)=O)C)=O)=O)CCC(N)=O)=O)=O)C
LJAT01	SKIN	Propionibacterium acnes	[u'RIBOSOMAL']	[u'THIOPEPTIDE']	3	346_["BERNINAMYCIN-C"]	0.8	O=C(N)C(=C)NC(=O)c4nc5c1nc(oc1)C(=C)NC(=O)C(=C)NC(=O)c2nc(oc2C)C(=C)NC(=O)C(NC(=O)C(=C)NC(=O)c3nc(oc3C)C(=CC)NC(=O)C(NC(=O)c6nc(c5(cc4))sc6)C(O)C)C(O)(C)C
AGKT01	ORAL	Streptococcus mutans TCI-152	[u'RIBOSOMAL']	[u'CLASS_II_BACTERIOCIN']	3	69_Antimicrobial protein BL-A60	0.545455		MLVDILTIKKGGIHMNTKMMEQFETMDAETLSHVTGGGLYDGANGYAYRDSQGHWAYKVTKTPAQALTDVVVNSWASGAASFAAYA
LTOR01	URINE	Enterococcus sp. HMSC072D11	[u'RIBOSOMAL']	[u'CLASS_II_BACTERIOCIN']	3	40_Enterocin A	1		MKHLKILSIKETQLIYGGTTHSGKYYGNGVYCTKNKCTVDWAKATTCIAGMSIGGFLGGAIPGKC
MAMR01	URINE	Lactobacillus crispatus	[u'RIBOSOMAL']	[u'CLASS_III_BACTERIOCIN']	3	69_Antimicrobial protein BL-A60	0.636364		MKHLNETTNVNILSQFDLGTGYQAVVQKGNVGKKYVYALQLRKGVTTILRGYRGNKINSPILKLSDQAGGHTQTWEFAGNHKDINGNDRAGQWFVGVKPTKIQGSDIIWARQMARVDINTQAGPHADNTDFPRLSYLNRAGANPYAGKVMTHAEAAVSPNYKKFLIATIENNRIGHFTIYDLDKINQALDKSGKYKDVSLDGFEYEDSFTINNLYGNAEDAVVNSIQGYDLDNDGNIYISSQKAPDFDGSYHAYHKQIVKIPWNGRSETKEDQWESVNLSAFGGLDISKKHSEVESIQILSENHCYLTVAYHSKLDGKNKTTLNRIYELSWS
JGOJ01	URINE	Staphylococcus aureus DAR3587	[u'RIBOSOMAL']	[u'BACTERIAL_HEAD_TO_TAIL_CYCLIZED']	3	595_Syanodin I	0.590909	CC(C[C@@H](C(N[C@H](C(NCC(O)=O)=O)C)=O)NC(CNC([C@@H](NC(CNC([C@@H](NC([C@@H]1CCCN1C([C@@H](NC([C@@H]2CC(NCC(N[C@H](C(N[C@H](C(NCC(NCC(N[C@H](C(N[C@H](C(N2)=O)C(C)C)=O)[C@H](O)C)=O)=O)=O)CO)=O)CC(C)C)=O)=O)=O)C)=O)=O)C)=O)=O)CCC(N)=O)=O)=O)C
LNMJ01	STOOL	Enterococcus faecium	[u'RIBOSOMAL']	[u'CLASS_II_BACTERIOCIN']	1	16_Bacteriocin T8	1		MKKKVLKHCVILGILGTCLAGIGTGIKVDAATYYGNGLYCNKEKCWVDWNQAKGEIGKIIVNGWVNHGPWAPRR
LNMJ01	STOOL	Enterococcus faecium	[u'RIBOSOMAL']	[u'CLASS_II_BACTERIOCIN']	3	40_Enterocin A	1		MKHLKILSIKETQLIYGGTTHSGKYYGNGVYCTKNKCTVDWAKATTCIAGMSIGGFLGGAIPGKC
LNMC01	STOOL	Enterococcus faecium	[u'RIBOSOMAL']	[u'CLASS_II_BACTERIOCIN']	2	16_Bacteriocin T8	1		MKKKVLKHCVILGILGTCLAGIGTGIKVDAATYYGNGLYCNKEKCWVDWNQAKGEIGKIIVNGWVNHGPWAPRR
LNMC01	STOOL	Enterococcus faecium	[u'RIBOSOMAL']	[u'CLASS_II_BACTERIOCIN']	4	40_Enterocin A	1		MKHLKILSIKETQLIYGGTTHSGKYYGNGVYCTKNKCTVDWAKATTCIAGMSIGGFLGGAIPGKC
CDWM01	CSF	Streptococcus suis	[u'RIBOSOMAL']	[u'CLASS_I_LANTIPEPTIDE']	1	148_["NISIN U"]	0.941176	CCC(C(C(N/C(C(NC(C(NC(C(NC(C(NC1CC(C)C)=O)=C)=O)CCCCN)=O)CSCC(C(NC(C(N2CCCC2C(NCC(NC(C(NC(C(NC(C(NCC(NC(C(NC(C(NC(C(N/C(C(NC(C(N3CCCC3C(NC(C(NC(C(NC(C(NC(C(NC(C(NC(C(NCC(NC(C(NC(C(NC(C(NCC(O)=O)=O)Cc4ccccc4)=O)Cc5nc[nH]c5)=O)CS6)=O)=O)CS7)=O)C6C)=O)C)=O)C7C)=O)CCCCN)=O)CC(C)C)=O)=O)CS8)=O)=C\C)=O)CCSC)=O)CC(C)C)=O)C(CC)C)=O)=O)C8C)=O)CCCCN)=O)CS9)=O)=O)=O)C9C)=O)NC1=O)=O)=C\C)=O)N)C
AGML01	ORAL	Streptococcus mutans TCI-294	[u'RIBOSOMAL']	[u'CLASS_II_BACTERIOCIN']	2	69_Antimicrobial protein BL-A60	0.545455		MNTKMMEQFETMDAETLSHVTGGGLYDGANGYAYRDSQGHWAYKVTKTPAQALTDVVVNSWASGAASFAAYA
JNPS01	STOOL	Escherichia coli 2-005-03_S4_C1	[u'RIBOSOMAL']	[u'LINEAR_AZOLE_CONTAINING_PEPTIDE']	5	601_["MccB17","MICROCIN B17","MICROCIN 17W"]	0.924528	O=C(O)C(N=C(O)C(N=C(O)C(N=C(O)CN=C(O)c1nc(oc1)CN=C(O)CN=C(O)c2nc(oc2)CN=C(O)CN=C(O)C(N=C(O)CN=C(O)CN=C(O)c3nc(oc3)c8nc(CN=C(O)C(N=C(O)C(N=C(O)c7nc(CN=C(O)CN=C(O)c6nc(CN=C(O)CN=C(O)CN=C(O)C(N=C(O)CN=C(O)CN=C(O)c5nc(c4nc(oc4)CN=C(O)CN=C(O)CN=C(O)CN=C(O)CN=C(O)CN=C(O)CN=C(O)CN=C(O)CN=C(O)CN=C(O)C(N=C(O)CN=C(O)C(N)C(C)C)C(C)CC)sc5)CCC(=N)O)sc6)sc7)CO)CC(=N)O)sc8)CC(=N)O)CO)Cc9cnc[nH]9)C(C)CC
AXZG01	ORAL	Rothia aeria F0184	[u'RIBOSOMAL']	[u'CLASS_II_LANTIPEPTIDE', u'LASSO_PEPTIDE']	2	569_["XANTHOMONIN II"]	0.684211	CC(C)C[C@@H](C(N[C@@H](C)C(NCC(N[C@H](C(N[C@H](C(N[C@@H](CCSC)C(NCC(NCC(N[C@@H]([C@H](CC)C)C(N[C@H](C(N[C@H](C(O)=O)[C@@H](C)O)=O)[C@@H](C)O)=O)=O)=O)=O)=O)CCC(O)=O)=O)CC1)=O)=O)=O)NC([C@@H]2CCCN2C(CNC(CNC1=O)=O)=O)=O
CDXS01	CSF	Streptococcus suis	[u'RIBOSOMAL']	[u'CLASS_II_LANTIPEPTIDE']	2	88_["A-3802-VI-7"]	0.678571	O=C(O)CCC4NC(=O)C(NC(=O)C6NC(=O)C(NC(=O)C(NC(=O)C1NC(=O)C(NC(=O)C(NC(=O)CNC(=O)C(NC(=O)C(NC(=O)C)CSC1)CO)Cc3c[nH]c2ccccc23)C(C)C)C(C)SCC(NC4(=O))C(=O)NCC(=O)NC5C(=O)NC(C(=O)NC(C(=O)NC(C(=O)NC(C(=O)NC(C(=O)OC)CS(=O)C5(C))C)CSC6(C))C(C)CC)C(C)C)CC(C)C)C(C)CC
LTKI01	RESPIRATORY	Rothia sp. HMSC071F11	[u'RIBOSOMAL']	[u'CLASS_II_LANTIPEPTIDE', u'LINARIDIN']	4	182_BhtA1	0.692308	N[C@@H]([C@H](CC)C)C(NCC(N/C(C(N/C(C(N[C@H](C(N[C@H](C(N[C@H](C(NC(C(N/C(C(N[C@@H](CC1=CC=CC=C1)C(N[C@H](C(N[C@@H]([C@H](CC)C)C(N[C@H](C(N[C@H](C(NCC(N[C@H](C(N[C@H](C(NCC(N[C@@H](CC2=CC=C(C=C2)O)C(N[C@H]3[C@H](CC)C)=O)=O)=O)CCCCN)=O)CC(N)=O)=O)=O)CC(C)C)=O)C(C)C)=O)=O)CSC[C@@H](C(N[C@H](C(N[C@H](C(N[C@H](C(N[C@H](C(N[C@H](C(N[C@@H](CS4)C(N[C@@H](CCSC)C(N[C@H](C(N[C@H](C(N[C@@H](CS5)C(N[C@H](C(O)…
CECN01	CSF	Streptococcus suis	[u'RIBOSOMAL']	[u'CLASS_II_LANTIPEPTIDE']	1	88_["A-3802-VI-7"]	0.678571	O=C(O)CCC4NC(=O)C(NC(=O)C6NC(=O)C(NC(=O)C(NC(=O)C1NC(=O)C(NC(=O)C(NC(=O)CNC(=O)C(NC(=O)C(NC(=O)C)CSC1)CO)Cc3c[nH]c2ccccc23)C(C)C)C(C)SCC(NC4(=O))C(=O)NCC(=O)NC5C(=O)NC(C(=O)NC(C(=O)NC(C(=O)NC(C(=O)NC(C(=O)OC)CS(=O)C5(C))C)CSC6(C))C(C)CC)C(C)C)CC(C)C)C(C)CC
CDWD01	CSF	Streptococcus suis	[u'RIBOSOMAL']	[u'CLASS_I_LANTIPEPTIDE']	1	148_["NISIN U"]	0.941176	CCC(C(C(N/C(C(NC(C(NC(C(NC(C(NC1CC(C)C)=O)=C)=O)CCCCN)=O)CSCC(C(NC(C(N2CCCC2C(NCC(NC(C(NC(C(NC(C(NCC(NC(C(NC(C(NC(C(N/C(C(NC(C(N3CCCC3C(NC(C(NC(C(NC(C(NC(C(NC(C(NC(C(NCC(NC(C(NC(C(NC(C(NCC(O)=O)=O)Cc4ccccc4)=O)Cc5nc[nH]c5)=O)CS6)=O)=O)CS7)=O)C6C)=O)C)=O)C7C)=O)CCCCN)=O)CC(C)C)=O)=O)CS8)=O)=C\C)=O)CCSC)=O)CC(C)C)=O)C(CC)C)=O)=O)C8C)=O)CCCCN)=O)CS9)=O)=O)=O)C9C)=O)NC1=O)=O)=C\C)=O)N)C
CDUG01	CSF	Streptococcus suis	[u'RIBOSOMAL']	[u'CLASS_II_LANTIPEPTIDE']	2	88_["A-3802-VI-7"]	0.678571	O=C(O)CCC4NC(=O)C(NC(=O)C6NC(=O)C(NC(=O)C(NC(=O)C1NC(=O)C(NC(=O)C(NC(=O)CNC(=O)C(NC(=O)C(NC(=O)C)CSC1)CO)Cc3c[nH]c2ccccc23)C(C)C)C(C)SCC(NC4(=O))C(=O)NCC(=O)NC5C(=O)NC(C(=O)NC(C(=O)NC(C(=O)NC(C(=O)NC(C(=O)OC)CS(=O)C5(C))C)CSC6(C))C(C)CC)C(C)C)CC(C)C)C(C)CC
AUZB01	STOOL	Clostridium botulinum A2B3 87	[u'RIBOSOMAL']	[u'LINEAR_AZOLE_CONTAINING_PEPTIDE']	2	603_clostridiolysin_S	0.9	NC(CS)C1=NC(C2=NC(C3=NC(C4=NC(C5=NC(C6=NC(C7=NC(C8=NC(C(NC(C9=NC(C(NC(C%10=NC(C(NC(C(NCC(NCC(NCC%11=NC(C(NC(C)C%12=NC(C%13=NC(C(NCC(NCC(NCC(NC(C)C(NC(C)C(NC(C)C(NCC(NC(C(NCC(NCC(NC(C(O)=O)CC(N)=O)=O)=O)=O)CCC(N)=O)=O)=O)=O)=O)=O)=O)=O)=O)=C(C)O%13)=CO%12)=O)=CO%11)=O)=O)=O)C(C)C)=O)=CO%10)C(C)C)=O)=CO9)C(C)C)=O)=CS8)=CS7)=CS6)=CS5)=CO4)=CS3)=CS2)=CS1
AZFO01	GI	Lactobacillus ultunensis DSM 16047	[u'RIBOSOMAL']	[u'CLASS_III_BACTERIOCIN']	3	69_Antimicrobial protein BL-A60	0.545455		MKFRKQIITLLGAVLLGSSVSMSTVASADTIDSNPITNITDTVDANKDTTKKTYKWTYPFKACEKYGVRPMFNAQVFGMTNYLRSVNPPSYFHDGWDFGHSEVGYSPVYAIHPGTVKKVGYANGLGWFIWIISPDKYVEIYQEGFTKKRDIYVKTGQKVKAGQKIGKLTGSHLHLGLTKTTKKYINKHGFPCNNWNVNNGTWLNPISVIKKHYRK
AZFO01	GI	Lactobacillus ultunensis DSM 16047	[u'RIBOSOMAL']	[u'CLASS_III_BACTERIOCIN']	4	69_Antimicrobial protein BL-A60	0.727273		MKTLNETTNVNILSQFDLGTGYQAVVQKGNVGSKYVYALQLRGDTTTILRGYRGYNINNSILELSGQAGGHTQTWEFAGNHNDINGNTRAGQWFVGVKPSYNDPKYKWAKQIARVDIRYTSGPHASNTEFPRLAYLNRAGSDPFSGDDMTHAEAAVSPDYTKFLIATIEDGEIGHFTIYDLDTINNALDNAGTGYVSLDGFPYQTSFTISNLYGDGQDNIINSIQGFDLDNNGNIYISSQHYPSLKNGHWSVHHKQIVKIPYYAQSEDAESQWSSVNLSAFGGLDISGKHSEVESIQIIDEDHCYLTVAYHANVYGENKTVLNKIYELTWD
LSTR01	GI	Sphingobium yanoikuyae	[u'RIBOSOMAL']	[u'LASSO_PEPTIDE']	2	595_Syanodin I	0.954545	CC(C[C@@H](C(N[C@H](C(NCC(O)=O)=O)C)=O)NC(CNC([C@@H](NC(CNC([C@@H](NC([C@@H]1CCCN1C([C@@H](NC([C@@H]2CC(NCC(N[C@H](C(N[C@H](C(NCC(NCC(N[C@H](C(N[C@H](C(N2)=O)C(C)C)=O)[C@H](O)C)=O)=O)=O)CO)=O)CC(C)C)=O)=O)=O)C)=O)=O)C)=O)=O)CCC(N)=O)=O)=O)C
LSTR01	GI	Sphingobium yanoikuyae	[u'RIBOSOMAL']	[u'LASSO_PEPTIDE']	4	280_["Promothiocin A]	0.533333	O=C(NC(=C)C(=N)O)c3nc4c1nc(oc1C)C(N=C(O)c6nc(C(N=C(O)c2nc(oc2C)CN=C(O)C(N=C(O)c5nc(c4(cc3))sc5)C(C)C)C)sc6)C
LTUK01	RESPIRATORY	Rothia sp. HMSC069C01	[u'RIBOSOMAL']	[u'CLASS_II_LANTIPEPTIDE']	3	122_[MUTACIN B-NY266"]	0.642857	C/C=C(C(NCC(NC(C(NC(C(NC(C(NC(C(NC1Cc2ccc(O)cc2)=O)CS/C=C/NC3=O)=O)CC(N)=O)=O)Cc4ccccc4)=O)CSCC3NC1=O)=O)=O)\NC(C(NC(C(NC(C(NC(CNC(C5CCCN56)=O)=O)CSC(C)C(NC(C(NC(C(NC(C(NC(C(N7)CC8=CNc9c8cccc9)=O)=C)=O)Cc%10ccccc%10)=O)CSCC(NC(C(NC(C(Cc%11ccccc%11)N)=O)CCCCN)=O)C7=O)=O)C6=O)=O)C)=O)CCCCN)=O
LTFZ01	RESPIRATORY	Rothia sp. HMSC065G12	[u'RIBOSOMAL']	[u'CLASS_II_LANTIPEPTIDE', u'LINARIDIN']	3	182_BhtA1	0.692308	N[C@@H]([C@H](CC)C)C(NCC(N/C(C(N/C(C(N[C@H](C(N[C@H](C(N[C@H](C(NC(C(N/C(C(N[C@@H](CC1=CC=CC=C1)C(N[C@H](C(N[C@@H]([C@H](CC)C)C(N[C@H](C(N[C@H](C(NCC(N[C@H](C(N[C@H](C(NCC(N[C@@H](CC2=CC=C(C=C2)O)C(N[C@H]3[C@H](CC)C)=O)=O)=O)CCCCN)=O)CC(N)=O)=O)=O)CC(C)C)=O)C(C)C)=O)=O)CSC[C@@H](C(N[C@H](C(N[C@H](C(N[C@H](C(N[C@H](C(N[C@H](C(N[C@@H](CS4)C(N[C@@H](CCSC)C(N[C@H](C(N[C@H](C(N[C@@H](CS5)C(N[C@H](C(O)…
AUYZ01	STOOL	Clostridium botulinum B2 433	[u'RIBOSOMAL']	[u'LINEAR_AZOLE_CONTAINING_PEPTIDE']	2	603_clostridiolysin_S	0.9	NC(CS)C1=NC(C2=NC(C3=NC(C4=NC(C5=NC(C6=NC(C7=NC(C8=NC(C(NC(C9=NC(C(NC(C%10=NC(C(NC(C(NCC(NCC(NCC%11=NC(C(NC(C)C%12=NC(C%13=NC(C(NCC(NCC(NCC(NC(C)C(NC(C)C(NC(C)C(NCC(NC(C(NCC(NCC(NC(C(O)=O)CC(N)=O)=O)=O)=O)CCC(N)=O)=O)=O)=O)=O)=O)=O)=O)=O)=C(C)O%13)=CO%12)=O)=CO%11)=O)=O)=O)C(C)C)=O)=CO%10)C(C)C)=O)=CO9)C(C)C)=O)=CS8)=CS7)=CS6)=CS5)=CO4)=CS3)=CS2)=CS1
JSUX01	STOOL	Lactobacillus plantarum	[u'RIBOSOMAL']	[u'CLASS_II_BACTERIOCIN']	2	54_Plantaricin F	1		MKKFLVLRDRELNAISGGVFHAYSARGVRNNYKSAVGPADWVISAVRGFIHG
LNMQ01	STOOL	Enterococcus faecium	[u'RIBOSOMAL']	[u'CLASS_II_BACTERIOCIN']	1	40_Enterocin A	1		MKHLKILSIKETQLIYGGTTHSGKYYGNGVYCTKNKCTVDWAKATTCIAGMSIGGFLGGAIPGKC
LNMQ01	STOOL	Enterococcus faecium	[u'RIBOSOMAL']	[u'CLASS_II_BACTERIOCIN']	3	16_Bacteriocin T8	1		MKKKVLKHCVILGILGTCLAGIGTGIKVDAATYYGNGLYCNKEKCWVDWNQAKGEIGKIIVNGWVNHGPWAPRR
AXSX01	ORAL	Streptococcus mutans PKUSS-LG01	[u'RIBOSOMAL']	[u'CLASS_II_BACTERIOCIN']	3	69_Antimicrobial protein BL-A60	0.545455		MNTRMMEQFETMDAETLSHVTGGGLYDGANGYAYRDSQGHWAYKVTKTPAQALTDVVVNSWASGAASFAAYA
ASRG02	STOOL	Lactobacillus gasseri K7	[u'RIBOSOMAL']	[u'CLASS_II_BACTERIOCIN']	2	4_Bacteriocin lactacin F	0.604167		MALKTLEKHELRNVMGGNKWGNAVIGAATGATRGVSWCRGFGPWGMTACGLGGAAIGGYLGYKSN
ASRG02	STOOL	Lactobacillus gasseri K7	[u'RIBOSOMAL']	[u'BACTERIAL_HEAD_TO_TAIL_CYCLIZED']	3	76_acidocin_B	0.777778	NC(CC[C@@H](C(N[C@@H](CC1=CC=CC=C1)C(NCC(N[C@@H]([C@H](CC)C)C(N[C@@H](CC2=CN=CN2)C(N[C@H](C(N[C@@H](C)C(N[C@H](C(NCC(N[C@H](C(N[C@@H](C)C(N[C@H](C(N[C@H](C(N[C@H](C(N[C@H](C(N[C@@H](CC(O)=O)C(N[C@@H](C)C(N[C@H](C(N[C@@H](C)C(N[C@H](C(NCC(N[C@@H](C)C(N[C@H](C(N[C@H](C(NCC(N[C@H](C(N[C@@H](C)C(N[C@@H](CC3=CC=CC=C3)C(N[C@@H](C)C(N[C@@H](C)C(N[C@@H]([C@H](CC)C)C(N[C@H](C(NCC(N[C@H](C(N[C@H](C(N[C@H](…
JRLJ01	SKIN	Streptococcus pyogenes AA216	[u'RIBOSOMAL']	[u'LINEAR_AZOLE_CONTAINING_PEPTIDE']	2	600_["PLANTAZOLICIN B"]	0.789474	O=C(O)C(N=C(O)C1N=C(OC1(C))c2nc(oc2)c3nc(oc3)c4nc(oc4)c5nc(oc5)C(N=C(O)C(N=C(O)c6nc(oc6C)c7nc(oc7C)c%10nc(c8nc(oc8C)c9nc(C(N)CCCNC(=N)N)sc9)sc%10)C(C)CC)C(C)CC)Cc%11ccccc%11
JRLJ01	SKIN	Streptococcus pyogenes AA216	[u'RIBOSOMAL']	[u'CLASS_II_LANTIPEPTIDE']	4	121_["SALIVARICIN A"]	0.9375	CCC(C(C(NC(C(NC(C(NC(C(NC(C(NC(C(NC(C(NC(C(N1CCCC1C(NC(C(NC(C(NC(C(NC(C(NC(C(NC2CS3)=O)C(C)C)=O)Cc4ccccc4)=O)C(C)C)=O)CSCC(C(O)=O)NC2=O)=O)CC(N)=O)=O)=O)CS5)=O)CC(O)=O)=O)CC(O)=O)=O)C3C)=O)C(CC)C)=O)C5C)=O)C)=O)NC(C(NC(CNC(C(NC(CNC(C(NC(C(CCCCN)N)=O)CCCNC(N)=N)=O)=O)CO)=O)=O)CC6=CNc7c6cccc7)=O)C
ABQI01	STOOL	Enterococcus faecium E1071	[u'RIBOSOMAL']	[u'CLASS_II_BACTERIOCIN']	1	40_Enterocin A	0.978723		MHIKNTKTTFILSSEELKNIQGGSAVGVLGTTFSGATAGVKLCSAGGPYAIAACGVGGALLGAGFSMWTGA
ABQI01	STOOL	Enterococcus faecium E1071	[u'RIBOSOMAL']	[u'CLASS_II_BACTERIOCIN']	2	17_Enterocin B	1		MQNVKELSTKEMKQIIGGENDHRMPNELNRPNNLSKGGAKCGAAIAGGLFGIPKGPLAWAAGLANVYSKCN
AGMK01	ORAL	Streptococcus mutans TCI-292	[u'RIBOSOMAL']	[u'CLASS_II_BACTERIOCIN']	2	69_Antimicrobial protein BL-A60	0.545455		MNTRMMEQFETMDAETLSHVTGGGLYDGANGYAYRDSQGHWAYKVTKTPAQALTDVVVNSWASGAASFAAYA
LJGP01	VAGINA	Lactobacillus crispatus	[u'RIBOSOMAL']	[u'CLASS_III_BACTERIOCIN']	2	69_Antimicrobial protein BL-A60	0.636364		MKHLNETTNVNILSQFDLGTGYQAVVQKGNVGKKYVYALQLRKGVTTILRGYRGNKINSPILKLSDQAGGHTQTWEFAGNHKDINGNDRAGQWFVGVKPTKIQGSDIIWARQMARVDINTQAGPHADNTDFPRLSYLNRAGANPYAGKVMTHAEAAVSPNYKKFLIATIENNRIGHFTIYDLDKINQALDKSGKYKDVSLDGFEYEDSFTINNLYGNAEDAVVNSIQGYDLDNDGNIYISSQKAPDFDGSYHAYHKQIVKIPWNGRSETKEDQWESVNLSAFGGLDISKKHSEVESIQILSENHCYLTVAYHSKLDGKNKTTLNRIYELSWS
JGRQ01	EYE	Staphylococcus aureus DAR1275	[u'RIBOSOMAL']	[u'BACTERIAL_HEAD_TO_TAIL_CYCLIZED']	3	595_Syanodin I	0.590909	CC(C[C@@H](C(N[C@H](C(NCC(O)=O)=O)C)=O)NC(CNC([C@@H](NC(CNC([C@@H](NC([C@@H]1CCCN1C([C@@H](NC([C@@H]2CC(NCC(N[C@H](C(N[C@H](C(NCC(NCC(N[C@H](C(N[C@H](C(N2)=O)C(C)C)=O)[C@H](O)C)=O)=O)=O)CO)=O)CC(C)C)=O)=O)=O)C)=O)=O)C)=O)=O)CCC(N)=O)=O)=O)C
LNLQ01	STOOL	Enterococcus faecium	[u'RIBOSOMAL']	[u'CLASS_II_BACTERIOCIN']	1	16_Bacteriocin T8	1		MKKKVLKHCVILGILGTCLAGIGTGIKVDAATYYGNGLYCNKEKCWVDWNQAKGEIGKIIVNGWVNHGPWAPRR
LNLQ01	STOOL	Enterococcus faecium	[u'RIBOSOMAL']	[u'CLASS_II_BACTERIOCIN']	4	40_Enterocin A	1		MKHLKILSIKETQLIYGGTTHSGKYYGNGVYCTKNKCTVDWAKATTCIAGMSIGGFLGGAIPGKC
LNLI01	STOOL	Enterococcus faecium	[u'RIBOSOMAL']	[u'CLASS_II_BACTERIOCIN']	1	16_Bacteriocin T8	1		MKKKVLKHCVILGILGTCLAGIGTGIKVDAATYYGNGLYCNKEKCWVDWNQAKGEIGKIIVNGWVNHGPWAPRR
LNLI01	STOOL	Enterococcus faecium	[u'RIBOSOMAL']	[u'CLASS_II_BACTERIOCIN']	2	16_Bacteriocin T8	1		MKKKVLKHCVILGILGTCLAGIGTGIKVDAATYYGNGLYCNKEKCWVDWNQAKGEIGKIIVNGWVNHGPWAPRR
LNLI01	STOOL	Enterococcus faecium	[u'RIBOSOMAL']	[u'CLASS_II_BACTERIOCIN']	3	40_Enterocin A	1		MKHLKILSIKETQLIYGGTTHSGKYYGNGVYCTKNKCTVDWAKATTCIAGMSIGGFLGGAIPGKC
LNOY01	STOOL	Enterococcus faecium	[u'RIBOSOMAL']	[u'CLASS_II_BACTERIOCIN']	1	40_Enterocin A	1		MKHLKILSIKETQLIYGGTTHSGKYYGNGVYCTKNKCTVDWAKATTCIAGMSIGGFLGGAIPGKC
LNOY01	STOOL	Enterococcus faecium	[u'RIBOSOMAL']	[u'CLASS_II_BACTERIOCIN']	2	16_Bacteriocin T8	1		MKKKVLKHCVILGILGTCLAGIGTGIKVDAATYYGNGLYCNKEKCWVDWNQAKGEIGKIIVNGWVNHGPWAPRR
AOSX01	STOOL	Clostridium botulinum Af84	[u'RIBOSOMAL']	[u'LINEAR_AZOLE_CONTAINING_PEPTIDE']	4	603_clostridiolysin_S	0.9	NC(CS)C1=NC(C2=NC(C3=NC(C4=NC(C5=NC(C6=NC(C7=NC(C8=NC(C(NC(C9=NC(C(NC(C%10=NC(C(NC(C(NCC(NCC(NCC%11=NC(C(NC(C)C%12=NC(C%13=NC(C(NCC(NCC(NCC(NC(C)C(NC(C)C(NC(C)C(NCC(NC(C(NCC(NCC(NC(C(O)=O)CC(N)=O)=O)=O)=O)CCC(N)=O)=O)=O)=O)=O)=O)=O)=O)=O)=C(C)O%13)=CO%12)=O)=CO%11)=O)=O)=O)C(C)C)=O)=CO%10)C(C)C)=O)=CO9)C(C)C)=O)=CS8)=CS7)=CS6)=CS5)=CO4)=CS3)=CS2)=CS1
LRHJ01	SKIN	Streptococcus pyogenes	[u'RIBOSOMAL']	[u'LINEAR_AZOLE_CONTAINING_PEPTIDE']	2	600_["PLANTAZOLICIN B"]	0.789474	O=C(O)C(N=C(O)C1N=C(OC1(C))c2nc(oc2)c3nc(oc3)c4nc(oc4)c5nc(oc5)C(N=C(O)C(N=C(O)c6nc(oc6C)c7nc(oc7C)c%10nc(c8nc(oc8C)c9nc(C(N)CCCNC(=N)N)sc9)sc%10)C(C)CC)C(C)CC)Cc%11ccccc%11
LRHJ01	SKIN	Streptococcus pyogenes	[u'RIBOSOMAL']	[u'CLASS_II_LANTIPEPTIDE']	3	121_["SALIVARICIN A"]	0.9375	CCC(C(C(NC(C(NC(C(NC(C(NC(C(NC(C(NC(C(NC(C(N1CCCC1C(NC(C(NC(C(NC(C(NC(C(NC(C(NC2CS3)=O)C(C)C)=O)Cc4ccccc4)=O)C(C)C)=O)CSCC(C(O)=O)NC2=O)=O)CC(N)=O)=O)=O)CS5)=O)CC(O)=O)=O)CC(O)=O)=O)C3C)=O)C(CC)C)=O)C5C)=O)C)=O)NC(C(NC(CNC(C(NC(CNC(C(NC(C(CCCCN)N)=O)CCCNC(N)=N)=O)=O)CO)=O)=O)CC6=CNc7c6cccc7)=O)C
LRHJ01	SKIN	Streptococcus pyogenes	[u'RIBOSOMAL']	[u'CLASS_I_LANTIPEPTIDE']	4	124_["STREPTIN"]	1	CC(CC1NC(C(NC(C(NC(C(NC(CNC(C(C(C)C)N)=O)=O)CSCC(C(NC(C(N2CCCC2C(NCC(NC(C(NC(C(NC(C(NC(C(NC(C(NC3C(C)C)=O)CC(C)C)=O)CCCCN)=O)CC4=CNc5c4cccc5)=O)CS6)=O)CSCC(C(NC(C(N/C(C(N/C(C(N/C(C(NC(C(NC(C(O)=O)CCCCN)=O)C(C)C)=O)=C/C)=O)=C/C)=O)=C/C)=O)Cc7ccccc7)=O)NC3=O)=O)=O)=O)C6C)=O)NC1=O)=O)CCCNC(N)=N)=O)Cc8ccc(O)cc8)=O)C
MBRH01	URINE	Enterococcus faecium	[u'RIBOSOMAL']	[u'CLASS_II_BACTERIOCIN']	3	40_Enterocin A	1		MKHLKILSIKETQLIYGGTTHSGKYYGNGVYCTKNKCTVDWAKATTCIAGMSIGGFLGGAIPGKC
CDXP01	CSF	Streptococcus suis	[u'RIBOSOMAL']	[u'CLASS_II_LANTIPEPTIDE']	1	88_["A-3802-VI-7"]	0.678571	O=C(O)CCC4NC(=O)C(NC(=O)C6NC(=O)C(NC(=O)C(NC(=O)C1NC(=O)C(NC(=O)C(NC(=O)CNC(=O)C(NC(=O)C(NC(=O)C)CSC1)CO)Cc3c[nH]c2ccccc23)C(C)C)C(C)SCC(NC4(=O))C(=O)NCC(=O)NC5C(=O)NC(C(=O)NC(C(=O)NC(C(=O)NC(C(=O)NC(C(=O)OC)CS(=O)C5(C))C)CSC6(C))C(C)CC)C(C)C)CC(C)C)C(C)CC
JOQJ01	STOOL	Escherichia coli 4-203-08_S3_C1	[u'RIBOSOMAL']	[u'LINEAR_AZOLE_CONTAINING_PEPTIDE']	3	601_["MccB17","MICROCIN B17","MICROCIN 17W"]	0.924528	O=C(O)C(N=C(O)C(N=C(O)C(N=C(O)CN=C(O)c1nc(oc1)CN=C(O)CN=C(O)c2nc(oc2)CN=C(O)CN=C(O)C(N=C(O)CN=C(O)CN=C(O)c3nc(oc3)c8nc(CN=C(O)C(N=C(O)C(N=C(O)c7nc(CN=C(O)CN=C(O)c6nc(CN=C(O)CN=C(O)CN=C(O)C(N=C(O)CN=C(O)CN=C(O)c5nc(c4nc(oc4)CN=C(O)CN=C(O)CN=C(O)CN=C(O)CN=C(O)CN=C(O)CN=C(O)CN=C(O)CN=C(O)CN=C(O)C(N=C(O)CN=C(O)C(N)C(C)C)C(C)CC)sc5)CCC(=N)O)sc6)sc7)CO)CC(=N)O)sc8)CC(=N)O)CO)Cc9cnc[nH]9)C(C)CC
AWPF01	ORAL	Streptococcus pyogenes SP8-LAU	[u'RIBOSOMAL']	[u'CLASS_II_LANTIPEPTIDE']	1	121_["SALIVARICIN A"]	0.9375	CCC(C(C(NC(C(NC(C(NC(C(NC(C(NC(C(NC(C(NC(C(N1CCCC1C(NC(C(NC(C(NC(C(NC(C(NC(C(NC2CS3)=O)C(C)C)=O)Cc4ccccc4)=O)C(C)C)=O)CSCC(C(O)=O)NC2=O)=O)CC(N)=O)=O)=O)CS5)=O)CC(O)=O)=O)CC(O)=O)=O)C3C)=O)C(CC)C)=O)C5C)=O)C)=O)NC(C(NC(CNC(C(NC(CNC(C(NC(C(CCCCN)N)=O)CCCNC(N)=N)=O)=O)CO)=O)=O)CC6=CNc7c6cccc7)=O)C
AWPF01	ORAL	Streptococcus pyogenes SP8-LAU	[u'RIBOSOMAL']	[u'LINEAR_AZOLE_CONTAINING_PEPTIDE']	4	600_["PLANTAZOLICIN B"]	0.789474	O=C(O)C(N=C(O)C1N=C(OC1(C))c2nc(oc2)c3nc(oc3)c4nc(oc4)c5nc(oc5)C(N=C(O)C(N=C(O)c6nc(oc6C)c7nc(oc7C)c%10nc(c8nc(oc8C)c9nc(C(N)CCCNC(=N)N)sc9)sc%10)C(C)CC)C(C)CC)Cc%11ccccc%11
AUYV01	STOOL	Clostridium botulinum B2 331	[u'RIBOSOMAL']	[u'LINEAR_AZOLE_CONTAINING_PEPTIDE']	2	603_clostridiolysin_S	0.9	NC(CS)C1=NC(C2=NC(C3=NC(C4=NC(C5=NC(C6=NC(C7=NC(C8=NC(C(NC(C9=NC(C(NC(C%10=NC(C(NC(C(NCC(NCC(NCC%11=NC(C(NC(C)C%12=NC(C%13=NC(C(NCC(NCC(NCC(NC(C)C(NC(C)C(NC(C)C(NCC(NC(C(NCC(NCC(NC(C(O)=O)CC(N)=O)=O)=O)=O)CCC(N)=O)=O)=O)=O)=O)=O)=O)=O)=O)=C(C)O%13)=CO%12)=O)=CO%11)=O)=O)=O)C(C)C)=O)=CO%10)C(C)C)=O)=CO9)C(C)C)=O)=CS8)=CS7)=CS6)=CS5)=CO4)=CS3)=CS2)=CS1
AWSB01	ORAL	Actinobaculum sp. oral taxon 183 str. F0552	[u'RIBOSOMAL']	[u'CLASS_I_LANTIPEPTIDE']	2	174_planosporicin	0.863636	NC(C(N/C(C(NC(CSCC(NC1=O)C(NC2C(N3CCCC3C(NCC(NC(C(NC(C(O)C)C(NC(CSCC(N4)C(NC(CSCC(C=O)NC5=O)C(NC6CC7=CN=CN7)=O)=O)C(NC(CCC(O)=O)C(NCC(NCC(NCC(NC(CSCC5NC6=O)C(NCC4=O)=O)=O)=O)=O)=O)=O)=O)=O)CSC2C)=O)=O)=O)=O)C(NC(C(C)C)C(NC(C(NC1CC8=CNC9=C8C=CC=C9)=O)=C)=O)=O)=O)=C\C)=O)C(C)CC
AWSB01	ORAL	Actinobaculum sp. oral taxon 183 str. F0552	[u'RIBOSOMAL']	[u'LASSO_PEPTIDE']	3	567_["LASSOMYCIN"]	0.52381	CC(C)C[C@@H](C(N[C@H](C(N[C@H](C(N[C@H](C(N[C@@H](CC1=CC=CC=C1)C(N[C@@H](C)C(N[C@@H](C2)C(N[C@H](C(N[C@H](C(N[C@H](C(NCC(N[C@H](C(N[C@H](C(N[C@H](C(N[C@@H]([C@H](CC)C)C(OC)=O)=O)CC(N)=O)=O)CCCNC(N)=N)=O)CCCNC(N)=N)=O)=O)C(C)C)=O)CC(C)C)=O)CCC(N)=O)=O)=O)=O)=O)CC(C)C)=O)CCCNC(N)=N)=O)CCCNC(N)=N)=O)NC(CNC2=O)=O
AWSB01	ORAL	Actinobaculum sp. oral taxon 183 str. F0552	[u'RIBOSOMAL']	[u'CLASS_III_IV_LANTIPEPTIDE']	5	204_Prochlorosin 4.3	0.681818	O=C(C(N[C@@H](C)C(N[C@H](C(NCC(NC1)=O)=O)CSC[C@@H](C(N[C@@H](CC(O)=O)C(N[C@H](C(N[C@H](C(N[C@@H](CCSC)C(N[C@@H](CC2=CC=CC=C2)C(N[C@@H](CS3)C(N[C@@H](CC4=CC=C(C=C4)O)C(O)=O)=O)=O)=O)=O)CO)=O)C3C)=O)=O)NC1=O)=O)=O)CC
LFUW01	SKIN	Staphylococcus aureus subsp. aureus MRSA_S4	[u'RIBOSOMAL']	[u'CLASS_I_LANTIPEPTIDE']	4	105_["Lanthionine containing peptide","HYICIN M51"]	0.952381	O=C(N)CC5NC(=O)C(NC(=O)C(NC(=O)CNC(=O)C(=CC)NC(=O)C(NC(=O)C(NC(=O)C3NC(=O)CNC(=O)C4N(C(=O)C(NC(=O)C1NC(=O)C(NC(=O)C(=C)NC(=O)C(NC(=O)C(NC(=O)C(=CC)NC(=O)C(N)C(C)CC)CSC1)Cc2ccccc2)CC(C)C)C(C)SC3)CCC4)C)CCCCN)CSCC6NC(=O)C(NC(=O)C(NC5(=O))CSC=CNC6(=O))Cc7ccc(O)cc7)Cc8ccccc8
CDTN01	CSF	Streptococcus suis	[u'RIBOSOMAL']	[u'CLASS_II_LANTIPEPTIDE']	1	88_["A-3802-VI-7"]	0.678571	O=C(O)CCC4NC(=O)C(NC(=O)C6NC(=O)C(NC(=O)C(NC(=O)C1NC(=O)C(NC(=O)C(NC(=O)CNC(=O)C(NC(=O)C(NC(=O)C)CSC1)CO)Cc3c[nH]c2ccccc23)C(C)C)C(C)SCC(NC4(=O))C(=O)NCC(=O)NC5C(=O)NC(C(=O)NC(C(=O)NC(C(=O)NC(C(=O)NC(C(=O)OC)CS(=O)C5(C))C)CSC6(C))C(C)CC)C(C)C)CC(C)C)C(C)CC
AHRP01	ORAL	Streptococcus mutans 11SSST2	[u'RIBOSOMAL']	[u'CLASS_II_BACTERIOCIN']	5	69_Antimicrobial protein BL-A60	0.545455		MLVDILTIKKGGIHMNTKMMEQFETMDAETLSHVTGGGLYDGANGYAYRDSQGHWAYKVTKTPAQALTDVVVNSWASGAASFAAYA
JOTY01	URINE	Burkholderia pseudomallei	[u'RIBOSOMAL']	[u'LASSO_PEPTIDE']	12	561_["CAPISTRUIN"]	1	O[C@H](C)[C@@H](C(N1CCC[C@H]1C(NCC(N[C@@H](CC2=CC=CC=C2)C(N[C@H](C(N[C@H](C(N3CCC[C@H]3C(N[C@@H](C4)C(N[C@@H](C)C(N[C@H](C(N[C@H](C(N[C@@H]([C@H](CC)C)C(N[C@H](C(N[C@H](C(N[C@@H](CC5=CC=CC=C5)C(NCC(N[C@@H](CC6=CC=CC=C6)C(N[C@H](C(O)=O)CC(N)=O)=O)=O)=O)=O)CCCNC(N)=N)=O)CO)=O)=O)C(C)C)=O)CCCNC(N)=N)=O)=O)=O)=O)[C@@H](C)O)=O)CCC(N)=O)=O)=O)=O)=O)NC(CNC4=O)=O
AHSS01	ORAL	Streptococcus mutans ST1	[u'RIBOSOMAL']	[u'CLASS_II_LANTIPEPTIDE']	4	127_["VARIACIN"]	0.688889	CCC(C(C(NC(C(NC(C(NC(C(NC(C(NC(C(NC(C(NC(C(NC(C(NC(C(NC(C(NC(C(NC(C(NC(C(N/C1=C/C)=O)Cc2ccccc2)=O)C(C)C)=O)Cc3ccccc3)=O)CCC(N)=O)=O)Cc4ccccc4)=O)CSCC(C(NC(C(O)=O)=C)=O)NC5=O)=O)CC(N)=O)=O)CCSC)=O)Cc6nc[nH]c6)=O)CS7)=O)CCC(O)=O)=O)Cc8nc[nH]c8)=O)CSCC5NC1=O)=O)NC(C(C7C)NC(C9CCCN9C(C(C(CC)C)NC(C(C(C)C)NC(CNC(C(NC(CN)=O)=C)=O)=O)=O)=O)=O)=O)C
AHSS01	ORAL	Streptococcus mutans ST1	[u'RIBOSOMAL']	[u'CLASS_II_LANTIPEPTIDE']	5	193_Smb B	1	N[C@@H]([C@H](CC)C)C(NCC(N/C(C(N/C(C(N[C@H](C(N[C@H](C(N[C@H](C(NC(C(N/C(C(N[C@@H](CC1=CC=CC=C1)C(N[C@H](C(N[C@@H]([C@H](CC)C)C(N[C@H](C(N[C@H](C(NCC(N[C@H](C(N[C@H](C(NCC(N[C@@H](CC2=CC=C(C=C2)O)C(N[C@H]3[C@H](CC)C)=O)=O)=O)CCCCN)=O)CC(N)=O)=O)=O)CC(C)C)=O)C(C)C)=O)=O)CSC[C@@H](C(N[C@H](C(N[C@H](C(N[C@H](C(N[C@H](C(N[C@H](C(N[C@@H](CS4)C(N[C@@H](CCSC)C(N[C@H](C(N[C@H](C(N[C@@H](CS5)C(NC(C(N[C@H]…
AHSS01	ORAL	Streptococcus mutans ST1	[u'RIBOSOMAL']	[u'CLASS_II_BACTERIOCIN']	6	69_Antimicrobial protein BL-A60	0.545455		MLVDILTIKKGGIHMNTRMMEQFETMDAETLSHVTGGGLYDGANGYAYRDSQGHWAYKVTKTPAQALTDVVVNSWASGAASFAAYA
CDXG01	CSF	Streptococcus suis	[u'RIBOSOMAL']	[u'CLASS_II_LANTIPEPTIDE']	2	88_["A-3802-VI-7"]	0.678571	O=C(O)CCC4NC(=O)C(NC(=O)C6NC(=O)C(NC(=O)C(NC(=O)C1NC(=O)C(NC(=O)C(NC(=O)CNC(=O)C(NC(=O)C(NC(=O)C)CSC1)CO)Cc3c[nH]c2ccccc23)C(C)C)C(C)SCC(NC4(=O))C(=O)NCC(=O)NC5C(=O)NC(C(=O)NC(C(=O)NC(C(=O)NC(C(=O)NC(C(=O)OC)CS(=O)C5(C))C)CSC6(C))C(C)CC)C(C)C)CC(C)C)C(C)CC
AJJM01	FEET	Streptomyces somaliensis DSM 40738	[u'RIBOSOMAL']	[u'THIOPEPTIDE']	8	338_["Copsomycin"]	0.888889	O=C(O)c4nc(c2cc(O)c(nc2(c1nc(C(=O)C)sc1))C3=NCC(=CS3)C(=O)O)sc4
AMAO01	SKIN	Enterococcus faecium P1137	[u'RIBOSOMAL']	[u'CLASS_II_BACTERIOCIN']	2	40_Enterocin A	1		MKHLKILSIKETQLIYGGTTHSGKYYGNGVYCTKNKCTVDWAKATTCIAGMSIGGFLGGAIPGKC
LASW02	RESPIRATORY	Mycobacterium arupense	[u'RIBOSOMAL']	[u'LASSO_PEPTIDE']	5	276_["PRE-T","10381-T","PRE-10381-T"]	0.571429	O=C(N)c3nc4c1nc(oc1C)C(NC(=O)c6nc(C(NC(=O)c2nc(oc2C)CNC(=O)C(NC(=O)c5nc(c4(cc3))sc5)C(C)C)C)sc6)C
AGKX01	ORAL	Streptococcus mutans TCI-163	[u'RIBOSOMAL']	[u'CLASS_II_BACTERIOCIN']	3	69_Antimicrobial protein BL-A60	0.545455		MLVDILTIKKGGIHMNTRMMEQFETMDAETLSHVTGGGLYDGANGYAYRDSQGHWAYKVTKTPAQALTDVVVNSWASGAASFAAYA
CEBX01	CSF	Streptococcus suis	[u'RIBOSOMAL']	[u'CLASS_II_LANTIPEPTIDE']	2	88_["A-3802-VI-7"]	0.678571	O=C(O)CCC4NC(=O)C(NC(=O)C6NC(=O)C(NC(=O)C(NC(=O)C1NC(=O)C(NC(=O)C(NC(=O)CNC(=O)C(NC(=O)C(NC(=O)C)CSC1)CO)Cc3c[nH]c2ccccc23)C(C)C)C(C)SCC(NC4(=O))C(=O)NCC(=O)NC5C(=O)NC(C(=O)NC(C(=O)NC(C(=O)NC(C(=O)NC(C(=O)OC)CS(=O)C5(C))C)CSC6(C))C(C)CC)C(C)C)CC(C)C)C(C)CC
CDXY01	CSF	Streptococcus suis	[u'RIBOSOMAL']	[u'CLASS_II_LANTIPEPTIDE']	1	88_["A-3802-VI-7"]	0.678571	O=C(O)CCC4NC(=O)C(NC(=O)C6NC(=O)C(NC(=O)C(NC(=O)C1NC(=O)C(NC(=O)C(NC(=O)CNC(=O)C(NC(=O)C(NC(=O)C)CSC1)CO)Cc3c[nH]c2ccccc23)C(C)C)C(C)SCC(NC4(=O))C(=O)NCC(=O)NC5C(=O)NC(C(=O)NC(C(=O)NC(C(=O)NC(C(=O)NC(C(=O)OC)CS(=O)C5(C))C)CSC6(C))C(C)CC)C(C)C)CC(C)C)C(C)CC
LRQH01	URINE	Staphylococcus aureus	[u'RIBOSOMAL']	[u'CLASS_I_LANTIPEPTIDE']	1	105_["Lanthionine containing peptide","HYICIN M51"]	0.952381	O=C(N)CC5NC(=O)C(NC(=O)C(NC(=O)CNC(=O)C(=CC)NC(=O)C(NC(=O)C(NC(=O)C3NC(=O)CNC(=O)C4N(C(=O)C(NC(=O)C1NC(=O)C(NC(=O)C(=C)NC(=O)C(NC(=O)C(NC(=O)C(=CC)NC(=O)C(N)C(C)CC)CSC1)Cc2ccccc2)CC(C)C)C(C)SC3)CCC4)C)CCCCN)CSCC6NC(=O)C(NC(=O)C(NC5(=O))CSC=CNC6(=O))Cc7ccc(O)cc7)Cc8ccccc8
JSMV01	URINE	Escherichia coli	[u'RIBOSOMAL']	[u'LINEAR_AZOLE_CONTAINING_PEPTIDE']	3	601_["MccB17","MICROCIN B17","MICROCIN 17W"]	1	O=C(O)C(N=C(O)C(N=C(O)C(N=C(O)CN=C(O)c1nc(oc1)CN=C(O)CN=C(O)c2nc(oc2)CN=C(O)CN=C(O)C(N=C(O)CN=C(O)CN=C(O)c3nc(oc3)c8nc(CN=C(O)C(N=C(O)C(N=C(O)c7nc(CN=C(O)CN=C(O)c6nc(CN=C(O)CN=C(O)CN=C(O)C(N=C(O)CN=C(O)CN=C(O)c5nc(c4nc(oc4)CN=C(O)CN=C(O)CN=C(O)CN=C(O)CN=C(O)CN=C(O)CN=C(O)CN=C(O)CN=C(O)CN=C(O)C(N=C(O)CN=C(O)C(N)C(C)C)C(C)CC)sc5)CCC(=N)O)sc6)sc7)CO)CC(=N)O)sc8)CC(=N)O)CO)Cc9cnc[nH]9)C(C)CC
LTGJ01	STOOL	Enterococcus sp. HMSC063H10	[u'RIBOSOMAL']	[u'CLASS_II_BACTERIOCIN']	1	40_Enterocin A	1		MKHLKILSIKETQLIYGGTTHSGKYYGNGVYCTKNKCTVDWAKATTCIAGMSIGGFLGGAIPGKC
LTGJ01	STOOL	Enterococcus sp. HMSC063H10	[u'RIBOSOMAL']	[u'CLASS_II_BACTERIOCIN']	3	62_Bacteriocin enterocin-M	0.894737		MRKKLFSLTLIGKFGLVVTNFGTKVDAATRSYGNGVYCNNSKCWVNWGEAKENIAGIVISGWASGLAGIGH
LTGJ01	STOOL	Enterococcus sp. HMSC063H10	[u'RIBOSOMAL']	[u'CLASS_II_BACTERIOCIN']	5	17_Enterocin B	1		MQNVKELSTKEMKQIIGGENDHRMPNELNRPNNLSKGGAKCGAAIAGGLFGIPKGPLAWAAGLANVYSKCN
LTKP01	VAGINA	Enterococcus sp. HMSC063D12	[u'RIBOSOMAL']	[u'CLASS_II_BACTERIOCIN']	2	21_Enterocin L50A	0.954545		MGAIAKLVAKFGWPIVKKYYKQIMQFIGEGWAINKIIEWIKKHI
LTKP01	VAGINA	Enterococcus sp. HMSC063D12	[u'RIBOSOMAL']	[u'CLASS_II_BACTERIOCIN']	3	62_Bacteriocin enterocin-M	0.894737		MRKKLFSLALIGIFGLVVTNFGTKVDAATRSYGNGVYCNNSKCWVNWGEAKENIAGIVISGWASGLAGMGH
MAUB01	ORAL	Actinomyces oris	[u'RIBOSOMAL']	[u'LASSO_PEPTIDE']	1	546_["MICROVIRIDIN-B"]	0.555556	[H]C(O)(C)C([H])(NC(=O)CNC(=O)C([H])(NC(=O)C)Cc1ccccc1)C(=O)NC7([H])(C(=O)NC([H])(C(=O)NC3([H])(C(=O)NC([H])(C(=O)N8CCCC8([H])(C(=O)NC4([H])(C(=O)NC([H])(C(=O)NC([H])(C(=O)NC([H])(C(=O)NC([H])(C(=O)NC([H])(C(=O)O)Cc2ccc(O)cc2)CCC(=O)NCCCC3)CCC(=O)OC4)Cc5cc6ccccc6([nH]5))CC(=O)OC7([H])(C))))Cc9ccc(O)cc9))CC(C)C)
LRHC01	SKIN	Streptococcus pyogenes	[u'RIBOSOMAL']	[u'CLASS_II_LANTIPEPTIDE']	2	121_["SALIVARICIN A"]	0.9375	CCC(C(C(NC(C(NC(C(NC(C(NC(C(NC(C(NC(C(NC(C(N1CCCC1C(NC(C(NC(C(NC(C(NC(C(NC(C(NC2CS3)=O)C(C)C)=O)Cc4ccccc4)=O)C(C)C)=O)CSCC(C(O)=O)NC2=O)=O)CC(N)=O)=O)=O)CS5)=O)CC(O)=O)=O)CC(O)=O)=O)C3C)=O)C(CC)C)=O)C5C)=O)C)=O)NC(C(NC(CNC(C(NC(CNC(C(NC(C(CCCCN)N)=O)CCCNC(N)=N)=O)=O)CO)=O)=O)CC6=CNc7c6cccc7)=O)C
LRHC01	SKIN	Streptococcus pyogenes	[u'RIBOSOMAL']	[u'LINEAR_AZOLE_CONTAINING_PEPTIDE']	4	600_["PLANTAZOLICIN B"]	0.789474	O=C(O)C(N=C(O)C1N=C(OC1(C))c2nc(oc2)c3nc(oc3)c4nc(oc4)c5nc(oc5)C(N=C(O)C(N=C(O)c6nc(oc6C)c7nc(oc7C)c%10nc(c8nc(oc8C)c9nc(C(N)CCCNC(=N)N)sc9)sc%10)C(C)CC)C(C)CC)Cc%11ccccc%11
BCYI01	STOOL	Bifidobacterium longum subsp. longum	[u'RIBOSOMAL']	[u'CLASS_II_LANTIPEPTIDE']	1	199_Microbisporicin B	0.727273	NC(C(N/C(C(NC(C(NC(C(C)C)C(NC(C(NC1CC(C)C)=O)=C)=O)=O)CSCC(C(NC2C(NC(C(NC(CC3=CC=CC=C3)C(NC(CSC2C)C(NC(C(NC4C(NC(C(NCC(NCC(NCC(NC5C(NC(C(NC(CSC4)C(NC6C(NC(CC7=CC=CC=C7)C(NC(CSC5)C(N/C=C\SC6)=O)=O)=O)=O)=O)CC8=CC=CC=C8)=O)=O)=O)=O)=O)CCC(N)=O)=O)=O)C(C)O)=O)=O)=O)C)=O)=O)NC1=O)=O)=C\C)=O)C(C)CC
AECR01	SKIN	Staphylococcus aureus subsp. aureus MRSA131	[u'RIBOSOMAL']	[u'CLASS_I_LANTIPEPTIDE']	3	105_["Lanthionine containing peptide","HYICIN M51"]	0.952381	O=C(N)CC5NC(=O)C(NC(=O)C(NC(=O)CNC(=O)C(=CC)NC(=O)C(NC(=O)C(NC(=O)C3NC(=O)CNC(=O)C4N(C(=O)C(NC(=O)C1NC(=O)C(NC(=O)C(=C)NC(=O)C(NC(=O)C(NC(=O)C(=CC)NC(=O)C(N)C(C)CC)CSC1)Cc2ccccc2)CC(C)C)C(C)SC3)CCC4)C)CCCCN)CSCC6NC(=O)C(NC(=O)C(NC5(=O))CSC=CNC6(=O))Cc7ccc(O)cc7)Cc8ccccc8
CDVB01	CSF	Streptococcus suis	[u'RIBOSOMAL']	[u'CLASS_II_LANTIPEPTIDE']	1	88_["A-3802-VI-7"]	0.678571	O=C(O)CCC4NC(=O)C(NC(=O)C6NC(=O)C(NC(=O)C(NC(=O)C1NC(=O)C(NC(=O)C(NC(=O)CNC(=O)C(NC(=O)C(NC(=O)C)CSC1)CO)Cc3c[nH]c2ccccc23)C(C)C)C(C)SCC(NC4(=O))C(=O)NCC(=O)NC5C(=O)NC(C(=O)NC(C(=O)NC(C(=O)NC(C(=O)NC(C(=O)OC)CS(=O)C5(C))C)CSC6(C))C(C)CC)C(C)C)CC(C)C)C(C)CC
JHDL01	STOOL	Escherichia coli 1-110-08_S3_C3	[u'RIBOSOMAL']	[u'LASSO_PEPTIDE']	7	564_["LARIATIN B"]	0.583333	OC[C@@H](C(N[C@H](C(N[C@H](C(N[C@H](C(N[C@@H](CC1=CC=C(C=C1)O)C(N[C@H](C(N[C@H](C(N[C@@H](CC2=CNC3=C2C=CC=C3)C(N[C@H](C(NCC(N[C@@H](CC4=CN=CN4)C(N[C@H](C(N[C@H](C(N[C@H](C(N[C@@H]([C@H](CC)C)C(N[C@H](C(N5CCC[C@H]5C(N6[C@H](C(O)=O)CCC6)=O)=O)CCCCN)=O)=O)C(C)C)=O)CC(N)=O)=O)CO)=O)=O)=O)C(C)C)=O)=O)CC7)=O)CCCNC(N)=N)=O)=O)C(C)C)=O)CC(C)C)=O)CCC(N)=O)=O)NC(CNC7=O)=O
LALO01	NOSE	Staphylococcus aureus	[u'RIBOSOMAL']	[u'CLASS_I_LANTIPEPTIDE']	1	105_["Lanthionine containing peptide","HYICIN M51"]	0.952381	O=C(N)CC5NC(=O)C(NC(=O)C(NC(=O)CNC(=O)C(=CC)NC(=O)C(NC(=O)C(NC(=O)C3NC(=O)CNC(=O)C4N(C(=O)C(NC(=O)C1NC(=O)C(NC(=O)C(=C)NC(=O)C(NC(=O)C(NC(=O)C(=CC)NC(=O)C(N)C(C)CC)CSC1)Cc2ccccc2)CC(C)C)C(C)SC3)CCC4)C)CCCCN)CSCC6NC(=O)C(NC(=O)C(NC5(=O))CSC=CNC6(=O))Cc7ccc(O)cc7)Cc8ccccc8
LNMO01	STOOL	Enterococcus faecium	[u'RIBOSOMAL']	[u'CLASS_II_BACTERIOCIN']	1	16_Bacteriocin T8	1		MKKKVLKHCVILGILGTCLAGIGTGIKVDAATYYGNGLYCNKEKCWVDWNQAKGEIGKIIVNGWVNHGPWAPRR
LNMO01	STOOL	Enterococcus faecium	[u'RIBOSOMAL']	[u'CLASS_II_BACTERIOCIN']	4	40_Enterocin A	1		MKHLKILSIKETQLIYGGTTHSGKYYGNGVYCTKNKCTVDWAKATTCIAGMSIGGFLGGAIPGKC
LDPC01	NOSE	Staphylococcus aureus subsp. aureus	[u'RIBOSOMAL']	[u'CLASS_I_LANTIPEPTIDE']	3	105_["Lanthionine containing peptide","HYICIN M51"]	0.952381	O=C(N)CC5NC(=O)C(NC(=O)C(NC(=O)CNC(=O)C(=CC)NC(=O)C(NC(=O)C(NC(=O)C3NC(=O)CNC(=O)C4N(C(=O)C(NC(=O)C1NC(=O)C(NC(=O)C(=C)NC(=O)C(NC(=O)C(NC(=O)C(=CC)NC(=O)C(N)C(C)CC)CSC1)Cc2ccccc2)CC(C)C)C(C)SC3)CCC4)C)CCCCN)CSCC6NC(=O)C(NC(=O)C(NC5(=O))CSC=CNC6(=O))Cc7ccc(O)cc7)Cc8ccccc8
JSOH01	URINE	Escherichia coli	[u'RIBOSOMAL']	[u'LASSO_PEPTIDE']	5	563_["LARIATIN A"]	0.608696	OC[C@@H](C(N[C@H](C(N[C@H](C(N[C@H](C(N[C@@H](CC1=CC=C(C=C1)O)C(N[C@H](C(N[C@H](C(N[C@@H](CC2=CNC3=C2C=CC=C3)C(N[C@H](C(NCC(N[C@@H](CC4=CN=CN4)C(N[C@H](C(N[C@H](C(N[C@H](C(N[C@@H]([C@H](CC)C)C(N[C@H](C(N5CCC[C@H]5C(O)=O)=O)CCCCN)=O)=O)C(C)C)=O)CC(N)=O)=O)CO)=O)=O)=O)C(C)C)=O)=O)CC6)=O)CCCNC(N)=N)=O)=O)C(C)C)=O)CC(C)C)=O)CCC(N)=O)=O)NC(CNC6=O)=O
LORO01	STOOL	Enterococcus faecium	[u'RIBOSOMAL']	[u'CLASS_II_BACTERIOCIN']	2	40_Enterocin A	1		MKHLKILSIKETQLIYGGTTHSGKYYGNGVYCTKNKCTVDWAKATTCIAGMSIGGFLGGAIPGKC
AKAO01	VAGINA	Lactobacillus pentosus KCA1	[u'RIBOSOMAL']	[u'CLASS_II_BACTERIOCIN']	1	76_acidocin_B	0.666667		MVLNLKERLQLNRIEAVVLVALFAAVLLFATVNIVWLANKFGVHLTNHLTNSILNAVSNGSSLGSAFAVIAGVTLPGWAVAAVGALGATAA
LRHE01	SKIN	Streptococcus pyogenes	[u'RIBOSOMAL']	[u'CLASS_I_LANTIPEPTIDE']	1	124_["STREPTIN"]	1	CC(CC1NC(C(NC(C(NC(C(NC(CNC(C(C(C)C)N)=O)=O)CSCC(C(NC(C(N2CCCC2C(NCC(NC(C(NC(C(NC(C(NC(C(NC(C(NC3C(C)C)=O)CC(C)C)=O)CCCCN)=O)CC4=CNc5c4cccc5)=O)CS6)=O)CSCC(C(NC(C(N/C(C(N/C(C(N/C(C(NC(C(NC(C(O)=O)CCCCN)=O)C(C)C)=O)=C/C)=O)=C/C)=O)=C/C)=O)Cc7ccccc7)=O)NC3=O)=O)=O)=O)C6C)=O)NC1=O)=O)CCCNC(N)=N)=O)Cc8ccc(O)cc8)=O)C
LRHE01	SKIN	Streptococcus pyogenes	[u'RIBOSOMAL']	[u'CLASS_II_LANTIPEPTIDE']	2	121_["SALIVARICIN A"]	0.9375	CCC(C(C(NC(C(NC(C(NC(C(NC(C(NC(C(NC(C(NC(C(N1CCCC1C(NC(C(NC(C(NC(C(NC(C(NC(C(NC2CS3)=O)C(C)C)=O)Cc4ccccc4)=O)C(C)C)=O)CSCC(C(O)=O)NC2=O)=O)CC(N)=O)=O)=O)CS5)=O)CC(O)=O)=O)CC(O)=O)=O)C3C)=O)C(CC)C)=O)C5C)=O)C)=O)NC(C(NC(CNC(C(NC(CNC(C(NC(C(CCCCN)N)=O)CCCNC(N)=N)=O)=O)CO)=O)=O)CC6=CNc7c6cccc7)=O)C
LRHE01	SKIN	Streptococcus pyogenes	[u'RIBOSOMAL']	[u'LINEAR_AZOLE_CONTAINING_PEPTIDE']	5	600_["PLANTAZOLICIN B"]	0.789474	O=C(O)C(N=C(O)C1N=C(OC1(C))c2nc(oc2)c3nc(oc3)c4nc(oc4)c5nc(oc5)C(N=C(O)C(N=C(O)c6nc(oc6C)c7nc(oc7C)c%10nc(c8nc(oc8C)c9nc(C(N)CCCNC(=N)N)sc9)sc%10)C(C)CC)C(C)CC)Cc%11ccccc%11
LTMI01	SKIN	Staphylococcus sp. HMSC58A02	[u'RIBOSOMAL']	[u'CLASS_I_LANTIPEPTIDE']	4	105_["Lanthionine containing peptide","HYICIN M51"]	0.952381	O=C(N)CC5NC(=O)C(NC(=O)C(NC(=O)CNC(=O)C(=CC)NC(=O)C(NC(=O)C(NC(=O)C3NC(=O)CNC(=O)C4N(C(=O)C(NC(=O)C1NC(=O)C(NC(=O)C(=C)NC(=O)C(NC(=O)C(NC(=O)C(=CC)NC(=O)C(N)C(C)CC)CSC1)Cc2ccccc2)CC(C)C)C(C)SC3)CCC4)C)CCCCN)CSCC6NC(=O)C(NC(=O)C(NC5(=O))CSC=CNC6(=O))Cc7ccc(O)cc7)Cc8ccccc8
CDXR01	CSF	Streptococcus suis	[u'RIBOSOMAL']	[u'CLASS_II_LANTIPEPTIDE']	1	88_["A-3802-VI-7"]	0.678571	O=C(O)CCC4NC(=O)C(NC(=O)C6NC(=O)C(NC(=O)C(NC(=O)C1NC(=O)C(NC(=O)C(NC(=O)CNC(=O)C(NC(=O)C(NC(=O)C)CSC1)CO)Cc3c[nH]c2ccccc23)C(C)C)C(C)SCC(NC4(=O))C(=O)NCC(=O)NC5C(=O)NC(C(=O)NC(C(=O)NC(C(=O)NC(C(=O)NC(C(=O)OC)CS(=O)C5(C))C)CSC6(C))C(C)CC)C(C)C)CC(C)C)C(C)CC
AGBV01	ORAL	Streptococcus salivarius M18	[u'RIBOSOMAL']	[u'CLASS_II_LANTIPEPTIDE']	4	151_["Salivaricin 9"]	1	CC(CC(C(NC(C(NC(C(NC(C(N/C(C(NC(C(NC(C(NC(C(NC(C(NC(C(NC(C(O)=O)CS1)=O)CS2)=O)CCCCN)=O)CC(C)C)=O)CCCCN)=O)CCCCN)=O)=C/C)=O)CC3=CNc4c3cccc4)=O)C1C)=O)C)=O)NC(C(NC(C(NC(C(NC(C(NC(C(C2C)NC(C(N5)CC(C)C)=O)=O)Cc6nc[nH]c6)=O)CCC(O)=O)=O)CSC(C)C(NC(C(NC(C(C(C)C)NC(C(C(C)C)NC(CNC(C(NC(CN)=O)CC(N)=O)=O)=O)=O)=O)CC(C)C)=O)C5=O)=O)CC(N)=O)=O)C
LSDB01	VAGINA	Gemella asaccharolytica	[u'RIBOSOMAL']	[u'CLASS_I_LANTIPEPTIDE']	1	143_["haloduracin Hal beta"]	0.659091	CC(CC1NC(C(NC(C(C(C)C)NC(C(NC(C(C(C)C)NC(CNC(C(C(C)C)NC(/C(NC(C(NC(C(NC(C2CCCN2C(C(NC(/C(N3)=C\C)=O)CC4=CNc5c4cccc5)=O)=O)CSC(C)C(N)C3=O)=O)C)=O)=C/C)=O)=O)=O)=O)CSCC(C(N6CCCC6C(NC(C(NC(C(NC(C(NC(C(NC(C(NC(C(NC(C(NC(C(O)=O)CS7)=O)CCC(N)=O)=O)=C)=O)C7C)=O)CS8)=O)CCCCN)=O)C(O)C)=O)C8C)=O)=O)NC1=O)=O)=O)C)=O)C
CDXU01	CSF	Streptococcus suis	[u'RIBOSOMAL']	[u'CLASS_II_LANTIPEPTIDE']	1	88_["A-3802-VI-7"]	0.678571	O=C(O)CCC4NC(=O)C(NC(=O)C6NC(=O)C(NC(=O)C(NC(=O)C1NC(=O)C(NC(=O)C(NC(=O)CNC(=O)C(NC(=O)C(NC(=O)C)CSC1)CO)Cc3c[nH]c2ccccc23)C(C)C)C(C)SCC(NC4(=O))C(=O)NCC(=O)NC5C(=O)NC(C(=O)NC(C(=O)NC(C(=O)NC(C(=O)NC(C(=O)OC)CS(=O)C5(C))C)CSC6(C))C(C)CC)C(C)C)CC(C)C)C(C)CC
LRGM01	SKIN	Streptococcus pyogenes	[u'RIBOSOMAL']	[u'CLASS_I_LANTIPEPTIDE']	3	124_["STREPTIN"]	1	CC(CC1NC(C(NC(C(NC(C(NC(CNC(C(C(C)C)N)=O)=O)CSCC(C(NC(C(N2CCCC2C(NCC(NC(C(NC(C(NC(C(NC(C(NC(C(NC3C(C)C)=O)CC(C)C)=O)CCCCN)=O)CC4=CNc5c4cccc5)=O)CS6)=O)CSCC(C(NC(C(N/C(C(N/C(C(N/C(C(NC(C(NC(C(O)=O)CCCCN)=O)C(C)C)=O)=C/C)=O)=C/C)=O)=C/C)=O)Cc7ccccc7)=O)NC3=O)=O)=O)=O)C6C)=O)NC1=O)=O)CCCNC(N)=N)=O)Cc8ccc(O)cc8)=O)C
LRGM01	SKIN	Streptococcus pyogenes	[u'RIBOSOMAL']	[u'LINEAR_AZOLE_CONTAINING_PEPTIDE']	4	600_["PLANTAZOLICIN B"]	0.789474	O=C(O)C(N=C(O)C1N=C(OC1(C))c2nc(oc2)c3nc(oc3)c4nc(oc4)c5nc(oc5)C(N=C(O)C(N=C(O)c6nc(oc6C)c7nc(oc7C)c%10nc(c8nc(oc8C)c9nc(C(N)CCCNC(=N)N)sc9)sc%10)C(C)CC)C(C)CC)Cc%11ccccc%11
JGRN01	RESPIRATORY	Staphylococcus aureus DAR1176	[u'RIBOSOMAL']	[u'BACTERIAL_HEAD_TO_TAIL_CYCLIZED']	3	569_["XANTHOMONIN II"]	0.578947	CC(C)C[C@@H](C(N[C@@H](C)C(NCC(N[C@H](C(N[C@H](C(N[C@@H](CCSC)C(NCC(NCC(N[C@@H]([C@H](CC)C)C(N[C@H](C(N[C@H](C(O)=O)[C@@H](C)O)=O)[C@@H](C)O)=O)=O)=O)=O)=O)CCC(O)=O)=O)CC1)=O)=O)=O)NC([C@@H]2CCCN2C(CNC(CNC1=O)=O)=O)=O
CDUL01	CSF	Streptococcus suis	[u'RIBOSOMAL']	[u'CLASS_II_LANTIPEPTIDE']	3	88_["A-3802-VI-7"]	0.678571	O=C(O)CCC4NC(=O)C(NC(=O)C6NC(=O)C(NC(=O)C(NC(=O)C1NC(=O)C(NC(=O)C(NC(=O)CNC(=O)C(NC(=O)C(NC(=O)C)CSC1)CO)Cc3c[nH]c2ccccc23)C(C)C)C(C)SCC(NC4(=O))C(=O)NCC(=O)NC5C(=O)NC(C(=O)NC(C(=O)NC(C(=O)NC(C(=O)NC(C(=O)OC)CS(=O)C5(C))C)CSC6(C))C(C)CC)C(C)C)CC(C)C)C(C)CC
AJRD01	STOOL	Enterococcus sp. GMD4E	[u'RIBOSOMAL']	[u'CLASS_II_BACTERIOCIN']	1	40_Enterocin A	1		MHIKNTKTTFILSSEELKNIQGGSAVGVLGTTFSGATAGVKLCSAGGPYAIAACGVGGALLGAGFSMWTGA
AJRD01	STOOL	Enterococcus sp. GMD4E	[u'RIBOSOMAL']	[u'CLASS_II_BACTERIOCIN']	3	17_Enterocin B	1		MQNVKELSTKEMKQIIGGENDHRMPNELNRPNNLSKGGAKCGAAIAGGLFGIPKGPLAWAAGLANVYSKCN
LNLP01	STOOL	Enterococcus faecium	[u'RIBOSOMAL']	[u'CLASS_II_BACTERIOCIN']	1	16_Bacteriocin T8	1		MKKKVLKHCVILGILGTCLAGIGTGIKVDAATYYGNGLYCNKEKCWVDWNQAKGEIGKIIVNGWVNHGPWAPRR
LNLP01	STOOL	Enterococcus faecium	[u'RIBOSOMAL']	[u'CLASS_II_BACTERIOCIN']	3	40_Enterocin A	1		KETQLIYGGTTHSGKYYGNGVYCTKNKCTVDWAKATTCIAGMSIGGFLGGAIPGKC
LNMN01	STOOL	Enterococcus faecium	[u'RIBOSOMAL']	[u'CLASS_II_BACTERIOCIN']	1	16_Bacteriocin T8	1		MKKKVLKHCVILGILGTCLAGIGTGIKVDAATYYGNGLYCNKEKCWVDWNQAKGEIGKIIVNGWVNHGPWAPRR
LNMN01	STOOL	Enterococcus faecium	[u'RIBOSOMAL']	[u'CLASS_II_BACTERIOCIN']	2	40_Enterocin A	1		MKHLKILSIKETQLIYGGTTHSGKYYGNGVYCTKNKCTVDWAKATTCIAGMSIGGFLGGAIPGKC
AGMU01	ORAL	Streptococcus mutans TCI-78	[u'RIBOSOMAL']	[u'CLASS_II_BACTERIOCIN']	3	69_Antimicrobial protein BL-A60	0.545455		MNTKMMEQFETMDAETLSHVTGGGLYDGANGYAYRDSQGHWAYKVTKTPAQALTDVVVNSWASGAASFAAYA
LTYF01	URINE	Micrococcus sp. HMSC067E09	[u'RIBOSOMAL']	[u'CLASS_III_IV_LANTIPEPTIDE']	1	143_["haloduracin Hal beta"]	0.704545	CC(CC1NC(C(NC(C(C(C)C)NC(C(NC(C(C(C)C)NC(CNC(C(C(C)C)NC(/C(NC(C(NC(C(NC(C2CCCN2C(C(NC(/C(N3)=C\C)=O)CC4=CNc5c4cccc5)=O)=O)CSC(C)C(N)C3=O)=O)C)=O)=C/C)=O)=O)=O)=O)CSCC(C(N6CCCC6C(NC(C(NC(C(NC(C(NC(C(NC(C(NC(C(NC(C(NC(C(O)=O)CS7)=O)CCC(N)=O)=O)=C)=O)C7C)=O)CS8)=O)CCCCN)=O)C(O)C)=O)C8C)=O)=O)NC1=O)=O)=O)C)=O)C
ANKG01	STOOL	Lactobacillus paracasei subsp. paracasei Lpp37	[u'RIBOSOMAL']	[u'CLASS_II_BACTERIOCIN']	3	539_["MICROVIRIDIN E"]	0.555556		MELLNEKELAHVIGGKRKCPKTPFDNTPGAWFAHLILGC
LRGT01	SKIN	Streptococcus pyogenes	[u'RIBOSOMAL']	[u'LINEAR_AZOLE_CONTAINING_PEPTIDE']	5	600_["PLANTAZOLICIN B"]	0.789474	O=C(O)C(N=C(O)C1N=C(OC1(C))c2nc(oc2)c3nc(oc3)c4nc(oc4)c5nc(oc5)C(N=C(O)C(N=C(O)c6nc(oc6C)c7nc(oc7C)c%10nc(c8nc(oc8C)c9nc(C(N)CCCNC(=N)N)sc9)sc%10)C(C)CC)C(C)CC)Cc%11ccccc%11
LRGT01	SKIN	Streptococcus pyogenes	[u'RIBOSOMAL']	[u'CLASS_I_LANTIPEPTIDE']	6	124_["STREPTIN"]	1	CC(CC1NC(C(NC(C(NC(C(NC(CNC(C(C(C)C)N)=O)=O)CSCC(C(NC(C(N2CCCC2C(NCC(NC(C(NC(C(NC(C(NC(C(NC(C(NC3C(C)C)=O)CC(C)C)=O)CCCCN)=O)CC4=CNc5c4cccc5)=O)CS6)=O)CSCC(C(NC(C(N/C(C(N/C(C(N/C(C(NC(C(NC(C(O)=O)CCCCN)=O)C(C)C)=O)=C/C)=O)=C/C)=O)=C/C)=O)Cc7ccccc7)=O)NC3=O)=O)=O)=O)C6C)=O)NC1=O)=O)CCCNC(N)=N)=O)Cc8ccc(O)cc8)=O)C
CDSU01	CSF	Streptococcus suis	[u'RIBOSOMAL']	[u'CLASS_II_LANTIPEPTIDE']	1	88_["A-3802-VI-7"]	0.678571	O=C(O)CCC4NC(=O)C(NC(=O)C6NC(=O)C(NC(=O)C(NC(=O)C1NC(=O)C(NC(=O)C(NC(=O)CNC(=O)C(NC(=O)C(NC(=O)C)CSC1)CO)Cc3c[nH]c2ccccc23)C(C)C)C(C)SCC(NC4(=O))C(=O)NCC(=O)NC5C(=O)NC(C(=O)NC(C(=O)NC(C(=O)NC(C(=O)NC(C(=O)OC)CS(=O)C5(C))C)CSC6(C))C(C)CC)C(C)C)CC(C)C)C(C)CC
JSFX01	URINE	Escherichia coli	[u'RIBOSOMAL']	[u'LINEAR_AZOLE_CONTAINING_PEPTIDE']	7	601_["MccB17","MICROCIN B17","MICROCIN 17W"]	1	O=C(O)C(N=C(O)C(N=C(O)C(N=C(O)CN=C(O)c1nc(oc1)CN=C(O)CN=C(O)c2nc(oc2)CN=C(O)CN=C(O)C(N=C(O)CN=C(O)CN=C(O)c3nc(oc3)c8nc(CN=C(O)C(N=C(O)C(N=C(O)c7nc(CN=C(O)CN=C(O)c6nc(CN=C(O)CN=C(O)CN=C(O)C(N=C(O)CN=C(O)CN=C(O)c5nc(c4nc(oc4)CN=C(O)CN=C(O)CN=C(O)CN=C(O)CN=C(O)CN=C(O)CN=C(O)CN=C(O)CN=C(O)CN=C(O)C(N=C(O)CN=C(O)C(N)C(C)C)C(C)CC)sc5)CCC(=N)O)sc6)sc7)CO)CC(=N)O)sc8)CC(=N)O)CO)Cc9cnc[nH]9)C(C)CC
CEBL01	CSF	Streptococcus suis	[u'RIBOSOMAL']	[u'CLASS_II_LANTIPEPTIDE']	2	88_["A-3802-VI-7"]	0.678571	O=C(O)CCC4NC(=O)C(NC(=O)C6NC(=O)C(NC(=O)C(NC(=O)C1NC(=O)C(NC(=O)C(NC(=O)CNC(=O)C(NC(=O)C(NC(=O)C)CSC1)CO)Cc3c[nH]c2ccccc23)C(C)C)C(C)SCC(NC4(=O))C(=O)NCC(=O)NC5C(=O)NC(C(=O)NC(C(=O)NC(C(=O)NC(C(=O)NC(C(=O)OC)CS(=O)C5(C))C)CSC6(C))C(C)CC)C(C)C)CC(C)C)C(C)CC
CEBZ01	CSF	Streptococcus suis	[u'RIBOSOMAL']	[u'LASSO_PEPTIDE']	2	616_Trifolitoxin	0.6	NC(CC(O)=O)C(NC(C(C)CC)C(NCC(NCC(NC(CO)C(/N=C(CCCNC(N)=N)/C(/N=C(CC1=O)/C(NCC2=NC(C(NC(C(NC(C)C(O)=O)=O)C(C)C)=O)CS2)=NC1=O)=O)=O)=O)=O)=O)=O
CEBZ01	CSF	Streptococcus suis	[u'RIBOSOMAL']	[u'CLASS_II_LANTIPEPTIDE']	3	88_["A-3802-VI-7"]	0.678571	O=C(O)CCC4NC(=O)C(NC(=O)C6NC(=O)C(NC(=O)C(NC(=O)C1NC(=O)C(NC(=O)C(NC(=O)CNC(=O)C(NC(=O)C(NC(=O)C)CSC1)CO)Cc3c[nH]c2ccccc23)C(C)C)C(C)SCC(NC4(=O))C(=O)NCC(=O)NC5C(=O)NC(C(=O)NC(C(=O)NC(C(=O)NC(C(=O)NC(C(=O)OC)CS(=O)C5(C))C)CSC6(C))C(C)CC)C(C)C)CC(C)C)C(C)CC
CDUI01	CSF	Streptococcus suis	[u'RIBOSOMAL']	[u'CLASS_II_LANTIPEPTIDE']	2	88_["A-3802-VI-7"]	0.678571	O=C(O)CCC4NC(=O)C(NC(=O)C6NC(=O)C(NC(=O)C(NC(=O)C1NC(=O)C(NC(=O)C(NC(=O)CNC(=O)C(NC(=O)C(NC(=O)C)CSC1)CO)Cc3c[nH]c2ccccc23)C(C)C)C(C)SCC(NC4(=O))C(=O)NCC(=O)NC5C(=O)NC(C(=O)NC(C(=O)NC(C(=O)NC(C(=O)NC(C(=O)OC)CS(=O)C5(C))C)CSC6(C))C(C)CC)C(C)C)CC(C)C)C(C)CC
ALYR01	ORAL	Streptococcus mutans B084SM-A	[u'RIBOSOMAL']	[u'CLASS_II_BACTERIOCIN']	1	69_Antimicrobial protein BL-A60	0.545455		MDTMAFENFDEIDMNHLASIEGEFDIKGVAASYLAVGTAALGGLACTTPVGVALYLGAEVCASAAAIYYGAN
AMAC01	SKIN	Enterococcus faecium V689	[u'RIBOSOMAL']	[u'CLASS_II_BACTERIOCIN']	1	40_Enterocin A	1		MKHLKILSIKETQLIYGGTTHSGKYYGNGVYCTKNKCTVDWAKATTCIAGMSIGGFLGGAIPGKC
AHSQ01	ORAL	Streptococcus mutans SF14	[u'RIBOSOMAL']	[u'CLASS_II_BACTERIOCIN']	6	69_Antimicrobial protein BL-A60	0.545455		MNTKMMEQFETMDTETLSHVTGGGLYDGTNGYAYRDSQGHWAYKVTKTPAQALTDVVVNSWASGAASFAAYA
JGPQ01	URINE	Staphylococcus aureus DAR3799	[u'RIBOSOMAL']	[u'BACTERIAL_HEAD_TO_TAIL_CYCLIZED']	2	595_Syanodin I	0.590909	CC(C[C@@H](C(N[C@H](C(NCC(O)=O)=O)C)=O)NC(CNC([C@@H](NC(CNC([C@@H](NC([C@@H]1CCCN1C([C@@H](NC([C@@H]2CC(NCC(N[C@H](C(N[C@H](C(NCC(NCC(N[C@H](C(N[C@H](C(N2)=O)C(C)C)=O)[C@H](O)C)=O)=O)=O)CO)=O)CC(C)C)=O)=O)=O)C)=O)=O)C)=O)=O)CCC(N)=O)=O)=O)C
FKLT01	STOOL	Enterococcus faecium	[u'RIBOSOMAL']	[u'CLASS_II_BACTERIOCIN']	2	40_Enterocin A	1		MKHLKILSIKETQLIYGGTTHSGKYYGNGVYCTKNKCTVDWAKATTCIAGMSIGGFLGGAIPGKC
LJAS01	SKIN	Propionibacterium acnes	[u'RIBOSOMAL']	[u'THIOPEPTIDE']	3	346_["BERNINAMYCIN-C"]	0.8	O=C(N)C(=C)NC(=O)c4nc5c1nc(oc1)C(=C)NC(=O)C(=C)NC(=O)c2nc(oc2C)C(=C)NC(=O)C(NC(=O)C(=C)NC(=O)c3nc(oc3C)C(=CC)NC(=O)C(NC(=O)c6nc(c5(cc4))sc6)C(O)C)C(O)(C)C
AGMQ01	ORAL	Streptococcus mutans TCI-51	[u'RIBOSOMAL']	[u'CLASS_II_BACTERIOCIN']	2	69_Antimicrobial protein BL-A60	0.545455		MNTKMMEQFETMDAETLSHVTGGGLYDGANGYAYRDSQGHWAYKVTKTPAQALTDVVVNSWASGAASFAAYA
CDXT01	CSF	Streptococcus suis	[u'RIBOSOMAL']	[u'CLASS_II_LANTIPEPTIDE']	3	88_["A-3802-VI-7"]	0.678571	O=C(O)CCC4NC(=O)C(NC(=O)C6NC(=O)C(NC(=O)C(NC(=O)C1NC(=O)C(NC(=O)C(NC(=O)CNC(=O)C(NC(=O)C(NC(=O)C)CSC1)CO)Cc3c[nH]c2ccccc23)C(C)C)C(C)SCC(NC4(=O))C(=O)NCC(=O)NC5C(=O)NC(C(=O)NC(C(=O)NC(C(=O)NC(C(=O)NC(C(=O)OC)CS(=O)C5(C))C)CSC6(C))C(C)CC)C(C)C)CC(C)C)C(C)CC
AJQZ01	STOOL	Enterococcus sp. GMD2E	[u'RIBOSOMAL']	[u'CLASS_II_BACTERIOCIN']	1	40_Enterocin A	1		MHIKNTKTTFILSSEELKNIQGGSAVGVLGTTFSGATAGVKLCSAGGPYAIAACGVGGALLGAGFSMWTGA
AJQZ01	STOOL	Enterococcus sp. GMD2E	[u'RIBOSOMAL']	[u'CLASS_II_BACTERIOCIN']	3	17_Enterocin B	1		MQNVKELSTKEMKQIIGGENDHRMPNELNRPNNLSKGGAKCGAAIAGGLFGIPKGPLAWAAGLANVYSKCN
AGNA01	ORAL	Streptococcus mutans TCI-99	[u'RIBOSOMAL']	[u'CLASS_II_BACTERIOCIN']	2	69_Antimicrobial protein BL-A60	0.545455		MLVDILTIKKGGIHMNTRMMEQFETMDAETLSHVTGGGLYDGANGYAYRDSQGHWAYKVTKTPAQALTDVVVNSWASGAASFAAYA
ANJS01	STOOL	Lactobacillus paracasei subsp. paracasei Lpp219	[u'RIBOSOMAL']	[u'CLASS_II_BACTERIOCIN']	4	641_Microviridin K	0.526316		MELLNEKELAHVIGGKRKCPKTPFDNTPGAWFAHLILGC
JGTM01	RESPIRATORY	Staphylococcus aureus DAR2068	[u'RIBOSOMAL']	[u'BACTERIAL_HEAD_TO_TAIL_CYCLIZED']	2	276_["PRE-T","10381-T","PRE-10381-T"]	0.571429	O=C(N)c3nc4c1nc(oc1C)C(NC(=O)c6nc(C(NC(=O)c2nc(oc2C)CNC(=O)C(NC(=O)c5nc(c4(cc3))sc5)C(C)C)C)sc6)C
CDVS01	CSF	Streptococcus suis	[u'RIBOSOMAL']	[u'CLASS_I_LANTIPEPTIDE']	1	148_["NISIN U"]	0.941176	CCC(C(C(N/C(C(NC(C(NC(C(NC(C(NC1CC(C)C)=O)=C)=O)CCCCN)=O)CSCC(C(NC(C(N2CCCC2C(NCC(NC(C(NC(C(NC(C(NCC(NC(C(NC(C(NC(C(N/C(C(NC(C(N3CCCC3C(NC(C(NC(C(NC(C(NC(C(NC(C(NC(C(NCC(NC(C(NC(C(NC(C(NCC(O)=O)=O)Cc4ccccc4)=O)Cc5nc[nH]c5)=O)CS6)=O)=O)CS7)=O)C6C)=O)C)=O)C7C)=O)CCCCN)=O)CC(C)C)=O)=O)CS8)=O)=C\C)=O)CCSC)=O)CC(C)C)=O)C(CC)C)=O)=O)C8C)=O)CCCCN)=O)CS9)=O)=O)=O)C9C)=O)NC1=O)=O)=C\C)=O)N)C
MKJS01	URINE	Escherichia coli	[u'RIBOSOMAL']	[u'LINEAR_AZOLE_CONTAINING_PEPTIDE']	2	601_["MccB17","MICROCIN B17","MICROCIN 17W"]	1	O=C(O)C(N=C(O)C(N=C(O)C(N=C(O)CN=C(O)c1nc(oc1)CN=C(O)CN=C(O)c2nc(oc2)CN=C(O)CN=C(O)C(N=C(O)CN=C(O)CN=C(O)c3nc(oc3)c8nc(CN=C(O)C(N=C(O)C(N=C(O)c7nc(CN=C(O)CN=C(O)c6nc(CN=C(O)CN=C(O)CN=C(O)C(N=C(O)CN=C(O)CN=C(O)c5nc(c4nc(oc4)CN=C(O)CN=C(O)CN=C(O)CN=C(O)CN=C(O)CN=C(O)CN=C(O)CN=C(O)CN=C(O)CN=C(O)C(N=C(O)CN=C(O)C(N)C(C)C)C(C)CC)sc5)CCC(=N)O)sc6)sc7)CO)CC(=N)O)sc8)CC(=N)O)CO)Cc9cnc[nH]9)C(C)CC
JGPW01	URINE	Staphylococcus aureus DAR3859	[u'RIBOSOMAL']	[u'BACTERIAL_HEAD_TO_TAIL_CYCLIZED']	2	595_Syanodin I	0.590909	CC(C[C@@H](C(N[C@H](C(NCC(O)=O)=O)C)=O)NC(CNC([C@@H](NC(CNC([C@@H](NC([C@@H]1CCCN1C([C@@H](NC([C@@H]2CC(NCC(N[C@H](C(N[C@H](C(NCC(NCC(N[C@H](C(N[C@H](C(N2)=O)C(C)C)=O)[C@H](O)C)=O)=O)=O)CO)=O)CC(C)C)=O)=O)=O)C)=O)=O)C)=O)=O)CCC(N)=O)=O)=O)C
AHSV01	ORAL	Streptococcus mutans NLML8	[u'RIBOSOMAL']	[u'CLASS_II_BACTERIOCIN']	4	69_Antimicrobial protein BL-A60	0.545455		MNTKMMEQFETMDTETLSHVTGGGLYDGANGYAYRDSQGHWAYKVTKTPAQALTDVVVNSWASGAASFAAYA
CEBU01	CSF	Streptococcus suis	[u'RIBOSOMAL']	[u'CLASS_II_LANTIPEPTIDE']	2	88_["A-3802-VI-7"]	0.678571	O=C(O)CCC4NC(=O)C(NC(=O)C6NC(=O)C(NC(=O)C(NC(=O)C1NC(=O)C(NC(=O)C(NC(=O)CNC(=O)C(NC(=O)C(NC(=O)C)CSC1)CO)Cc3c[nH]c2ccccc23)C(C)C)C(C)SCC(NC4(=O))C(=O)NCC(=O)NC5C(=O)NC(C(=O)NC(C(=O)NC(C(=O)NC(C(=O)NC(C(=O)OC)CS(=O)C5(C))C)CSC6(C))C(C)CC)C(C)C)CC(C)C)C(C)CC
ALZB01	ORAL	Streptococcus mutans B85SM-B	[u'RIBOSOMAL']	[u'CLASS_II_BACTERIOCIN']	3	69_Antimicrobial protein BL-A60	0.545455		MLVDILTIKKGGIHMNTKMMEQFETMDAETLSHVTGGGLYDGANGYAYRDSQGHWAYKVTKTPAQALTDVVVNSWASGAASFAAYA
AHTD01	ORAL	Streptococcus mutans SM1	[u'RIBOSOMAL']	[u'CLASS_II_BACTERIOCIN']	4	69_Antimicrobial protein BL-A60	0.545455		MNTKMMEQFEAMDTETLSHVTGGGLYDGANGYAYRDSQGHWAYKVTKTPAQALTDVVVNSWASGAASFAAYA
AHTD01	ORAL	Streptococcus mutans SM1	[u'RIBOSOMAL']	[u'CLASS_II_LANTIPEPTIDE']	7	114_["MUTACIN-II","MUTACIN-T8"]	0.95	O=C(O)CCC6NC(=O)C(NC(=O)C8NC(=O)C(NC(=O)C(NC(=O)C5N(C(=O)C(NC(=O)C(NC(=O)CNC(=O)C(NC(=O)C(NC(=O)C(NC(=O)C(NC(=O)CC(=O)N)CCCNC(=N)N)Cc2c[nH]c1ccccc12)Cc4c[nH]c3ccccc34)CCC(=O)N)C(C)C)C(C)C)CCC5)C(C)SCC(NC6(=O))C(=O)NC(C(=O)NC(C(=O)NC(C(=O)NC7C(=O)NC(C(=O)NC(C(=O)NC(C(=O)NC(C(=O)NC(C(=O)NC(=CC)C(=O)NC(C(=O)NC(C(=O)O)CSC7)CSC8)Cc9ccccc9)C(C)C)Cc%10nc[nH]c%10)CCC(=O)N)Cc%12c[nH]c%11ccccc%11%12)CC(=O)…
AVAK01	RESPIRATORY	Burkholderia pseudomallei MSHR5858	[u'RIBOSOMAL']	[u'LASSO_PEPTIDE']	6	561_["CAPISTRUIN"]	0.875	O[C@H](C)[C@@H](C(N1CCC[C@H]1C(NCC(N[C@@H](CC2=CC=CC=C2)C(N[C@H](C(N[C@H](C(N3CCC[C@H]3C(N[C@@H](C4)C(N[C@@H](C)C(N[C@H](C(N[C@H](C(N[C@@H]([C@H](CC)C)C(N[C@H](C(N[C@H](C(N[C@@H](CC5=CC=CC=C5)C(NCC(N[C@@H](CC6=CC=CC=C6)C(N[C@H](C(O)=O)CC(N)=O)=O)=O)=O)=O)CCCNC(N)=N)=O)CO)=O)=O)C(C)C)=O)CCCNC(N)=N)=O)=O)=O)=O)[C@@H](C)O)=O)CCC(N)=O)=O)=O)=O)=O)NC(CNC4=O)=O
LRHG01	SKIN	Streptococcus pyogenes	[u'RIBOSOMAL']	[u'CLASS_II_LANTIPEPTIDE']	1	121_["SALIVARICIN A"]	0.9375	CCC(C(C(NC(C(NC(C(NC(C(NC(C(NC(C(NC(C(NC(C(N1CCCC1C(NC(C(NC(C(NC(C(NC(C(NC(C(NC2CS3)=O)C(C)C)=O)Cc4ccccc4)=O)C(C)C)=O)CSCC(C(O)=O)NC2=O)=O)CC(N)=O)=O)=O)CS5)=O)CC(O)=O)=O)CC(O)=O)=O)C3C)=O)C(CC)C)=O)C5C)=O)C)=O)NC(C(NC(CNC(C(NC(CNC(C(NC(C(CCCCN)N)=O)CCCNC(N)=N)=O)=O)CO)=O)=O)CC6=CNc7c6cccc7)=O)C
LRHG01	SKIN	Streptococcus pyogenes	[u'RIBOSOMAL']	[u'LINEAR_AZOLE_CONTAINING_PEPTIDE']	3	600_["PLANTAZOLICIN B"]	0.789474	O=C(O)C(N=C(O)C1N=C(OC1(C))c2nc(oc2)c3nc(oc3)c4nc(oc4)c5nc(oc5)C(N=C(O)C(N=C(O)c6nc(oc6C)c7nc(oc7C)c%10nc(c8nc(oc8C)c9nc(C(N)CCCNC(=N)N)sc9)sc%10)C(C)CC)C(C)CC)Cc%11ccccc%11
LRHG01	SKIN	Streptococcus pyogenes	[u'RIBOSOMAL']	[u'BACTERIAL_HEAD_TO_TAIL_CYCLIZED', u'CLASS_II_BACTERIOCIN']	4	595_Syanodin I	0.681818		MTTMKELTINDMASISGGNAPGDAVIGGLGGLASGLKFCKLPHPVLTGGCVVGFTVGVAYLGYTAN
ALZG01	ORAL	Streptococcus mutans B114SM-A	[u'RIBOSOMAL']	[u'CLASS_II_BACTERIOCIN']	1	69_Antimicrobial protein BL-A60	0.545455		MLVDILTIKKGGIHMNTRMMEQFETMDAETLSHVTGGGLYDGANGYAYRDSQGHWAYKVTKTPAQALTDVVVNSWASGAASFAAYA
AHTE01	ORAL	Streptococcus mutans 24	[u'RIBOSOMAL']	[u'CLASS_II_LANTIPEPTIDE']	5	127_["VARIACIN"]	0.688889	CCC(C(C(NC(C(NC(C(NC(C(NC(C(NC(C(NC(C(NC(C(NC(C(NC(C(NC(C(NC(C(NC(C(NC(C(N/C1=C/C)=O)Cc2ccccc2)=O)C(C)C)=O)Cc3ccccc3)=O)CCC(N)=O)=O)Cc4ccccc4)=O)CSCC(C(NC(C(O)=O)=C)=O)NC5=O)=O)CC(N)=O)=O)CCSC)=O)Cc6nc[nH]c6)=O)CS7)=O)CCC(O)=O)=O)Cc8nc[nH]c8)=O)CSCC5NC1=O)=O)NC(C(C7C)NC(C9CCCN9C(C(C(CC)C)NC(C(C(C)C)NC(CNC(C(NC(CN)=O)=C)=O)=O)=O)=O)=O)=O)C
JGPO01	RESPIRATORY	Staphylococcus aureus DAR3794	[u'RIBOSOMAL']	[u'BACTERIAL_HEAD_TO_TAIL_CYCLIZED']	3	595_Syanodin I	0.590909	CC(C[C@@H](C(N[C@H](C(NCC(O)=O)=O)C)=O)NC(CNC([C@@H](NC(CNC([C@@H](NC([C@@H]1CCCN1C([C@@H](NC([C@@H]2CC(NCC(N[C@H](C(N[C@H](C(NCC(NCC(N[C@H](C(N[C@H](C(N2)=O)C(C)C)=O)[C@H](O)C)=O)=O)=O)CO)=O)CC(C)C)=O)=O)=O)C)=O)=O)C)=O)=O)CCC(N)=O)=O)=O)C
AGLC01	ORAL	Streptococcus mutans TCI-176	[u'RIBOSOMAL']	[u'CLASS_II_BACTERIOCIN']	2	69_Antimicrobial protein BL-A60	0.545455		MNTRMMEQFETMDAETLSHVTGGGLYDGANGYAYRDSQGHWAYKVTKTPAQALTDVVVNSWASGAASFAAYA
AGKY01	ORAL	Streptococcus mutans TCI-164	[u'RIBOSOMAL']	[u'CLASS_II_BACTERIOCIN']	2	69_Antimicrobial protein BL-A60	0.545455		MLVDILTIKKGGIHMNTKMMEQFETMDAETLSHVTGGGLYDGANGYAYRDSQGHWAYKVTKTPAQALTDVVVNSWASGAASFAAYA
LUWF01	STOOL	Lactobacillus plantarum	[u'RIBOSOMAL']	[u'CLASS_II_BACTERIOCIN']	3	54_Plantaricin F	1		MLQFEKLQYSRLPQKKLAKISGGFNRGGYNFGKSVRH
LNMR01	STOOL	Enterococcus faecium	[u'RIBOSOMAL']	[u'CLASS_II_BACTERIOCIN']	1	40_Enterocin A	1		MKHLKILSIKETQLIYGGTTHSGKYYGNGVYCTKNKCTVDWAKATTCIAGMSIGGFLGGAIPGKC
LNMR01	STOOL	Enterococcus faecium	[u'RIBOSOMAL']	[u'CLASS_II_BACTERIOCIN']	4	16_Bacteriocin T8	1		MKKKVLKHCVILGILGTCLAGIGTGIKVDAATYYGNGLYCNKEKCWVDWNQAKGEIGKIIVNGWVNHGPWAPRR
CEBK01	CSF	Streptococcus suis	[u'RIBOSOMAL']	[u'CLASS_I_LANTIPEPTIDE']	1	148_["NISIN U"]	0.941176	CCC(C(C(N/C(C(NC(C(NC(C(NC(C(NC1CC(C)C)=O)=C)=O)CCCCN)=O)CSCC(C(NC(C(N2CCCC2C(NCC(NC(C(NC(C(NC(C(NCC(NC(C(NC(C(NC(C(N/C(C(NC(C(N3CCCC3C(NC(C(NC(C(NC(C(NC(C(NC(C(NC(C(NCC(NC(C(NC(C(NC(C(NCC(O)=O)=O)Cc4ccccc4)=O)Cc5nc[nH]c5)=O)CS6)=O)=O)CS7)=O)C6C)=O)C)=O)C7C)=O)CCCCN)=O)CC(C)C)=O)=O)CS8)=O)=C\C)=O)CCSC)=O)CC(C)C)=O)C(CC)C)=O)=O)C8C)=O)CCCCN)=O)CS9)=O)=O)=O)C9C)=O)NC1=O)=O)=C\C)=O)N)C
AHVO01	NOSE	Staphylococcus aureus subsp. aureus CIGC345D	[u'RIBOSOMAL']	[u'CLASS_I_LANTIPEPTIDE']	3	105_["Lanthionine containing peptide","HYICIN M51"]	0.952381	O=C(N)CC5NC(=O)C(NC(=O)C(NC(=O)CNC(=O)C(=CC)NC(=O)C(NC(=O)C(NC(=O)C3NC(=O)CNC(=O)C4N(C(=O)C(NC(=O)C1NC(=O)C(NC(=O)C(=C)NC(=O)C(NC(=O)C(NC(=O)C(=CC)NC(=O)C(N)C(C)CC)CSC1)Cc2ccccc2)CC(C)C)C(C)SC3)CCC4)C)CCCCN)CSCC6NC(=O)C(NC(=O)C(NC5(=O))CSC=CNC6(=O))Cc7ccc(O)cc7)Cc8ccccc8
LRGR01	SKIN	Streptococcus pyogenes	[u'RIBOSOMAL']	[u'CLASS_II_LANTIPEPTIDE']	1	121_["SALIVARICIN A"]	0.9375	CCC(C(C(NC(C(NC(C(NC(C(NC(C(NC(C(NC(C(NC(C(N1CCCC1C(NC(C(NC(C(NC(C(NC(C(NC(C(NC2CS3)=O)C(C)C)=O)Cc4ccccc4)=O)C(C)C)=O)CSCC(C(O)=O)NC2=O)=O)CC(N)=O)=O)=O)CS5)=O)CC(O)=O)=O)CC(O)=O)=O)C3C)=O)C(CC)C)=O)C5C)=O)C)=O)NC(C(NC(CNC(C(NC(CNC(C(NC(C(CCCCN)N)=O)CCCNC(N)=N)=O)=O)CO)=O)=O)CC6=CNc7c6cccc7)=O)C
LRGR01	SKIN	Streptococcus pyogenes	[u'RIBOSOMAL']	[u'CLASS_I_LANTIPEPTIDE']	2	124_["STREPTIN"]	1	CC(CC1NC(C(NC(C(NC(C(NC(CNC(C(C(C)C)N)=O)=O)CSCC(C(NC(C(N2CCCC2C(NCC(NC(C(NC(C(NC(C(NC(C(NC(C(NC3C(C)C)=O)CC(C)C)=O)CCCCN)=O)CC4=CNc5c4cccc5)=O)CS6)=O)CSCC(C(NC(C(N/C(C(N/C(C(N/C(C(NC(C(NC(C(O)=O)CCCCN)=O)C(C)C)=O)=C/C)=O)=C/C)=O)=C/C)=O)Cc7ccccc7)=O)NC3=O)=O)=O)=O)C6C)=O)NC1=O)=O)CCCNC(N)=N)=O)Cc8ccc(O)cc8)=O)C
LRGR01	SKIN	Streptococcus pyogenes	[u'RIBOSOMAL']	[u'LINEAR_AZOLE_CONTAINING_PEPTIDE']	4	600_["PLANTAZOLICIN B"]	0.789474	O=C(O)C(N=C(O)C1N=C(OC1(C))c2nc(oc2)c3nc(oc3)c4nc(oc4)c5nc(oc5)C(N=C(O)C(N=C(O)c6nc(oc6C)c7nc(oc7C)c%10nc(c8nc(oc8C)c9nc(C(N)CCCNC(=N)N)sc9)sc%10)C(C)CC)C(C)CC)Cc%11ccccc%11
JGRK01	RESPIRATORY	Staphylococcus aureus DAR1158	[u'RIBOSOMAL']	[u'BACTERIAL_HEAD_TO_TAIL_CYCLIZED']	3	569_["XANTHOMONIN II"]	0.578947	CC(C)C[C@@H](C(N[C@@H](C)C(NCC(N[C@H](C(N[C@H](C(N[C@@H](CCSC)C(NCC(NCC(N[C@@H]([C@H](CC)C)C(N[C@H](C(N[C@H](C(O)=O)[C@@H](C)O)=O)[C@@H](C)O)=O)=O)=O)=O)=O)CCC(O)=O)=O)CC1)=O)=O)=O)NC([C@@H]2CCCN2C(CNC(CNC1=O)=O)=O)=O
LPXB01	STOOL	Escherichia coli	[u'RIBOSOMAL']	[u'LINEAR_AZOLE_CONTAINING_PEPTIDE']	8	601_["MccB17","MICROCIN B17","MICROCIN 17W"]	0.943396	O=C(O)C(N=C(O)C(N=C(O)C(N=C(O)CN=C(O)c1nc(oc1)CN=C(O)CN=C(O)c2nc(oc2)CN=C(O)CN=C(O)C(N=C(O)CN=C(O)CN=C(O)c3nc(oc3)c8nc(CN=C(O)C(N=C(O)C(N=C(O)c7nc(CN=C(O)CN=C(O)c6nc(CN=C(O)CN=C(O)CN=C(O)C(N=C(O)CN=C(O)CN=C(O)c5nc(c4nc(oc4)CN=C(O)CN=C(O)CN=C(O)CN=C(O)CN=C(O)CN=C(O)CN=C(O)CN=C(O)CN=C(O)CN=C(O)C(N=C(O)CN=C(O)C(N)C(C)C)C(C)CC)sc5)CCC(=N)O)sc6)sc7)CO)CC(=N)O)sc8)CC(=N)O)CO)Cc9cnc[nH]9)C(C)CC
JPHB01	RESPIRATORY	Burkholderia pseudomallei	[u'RIBOSOMAL']	[u'LASSO_PEPTIDE']	12	561_["CAPISTRUIN"]	1	O[C@H](C)[C@@H](C(N1CCC[C@H]1C(NCC(N[C@@H](CC2=CC=CC=C2)C(N[C@H](C(N[C@H](C(N3CCC[C@H]3C(N[C@@H](C4)C(N[C@@H](C)C(N[C@H](C(N[C@H](C(N[C@@H]([C@H](CC)C)C(N[C@H](C(N[C@H](C(N[C@@H](CC5=CC=CC=C5)C(NCC(N[C@@H](CC6=CC=CC=C6)C(N[C@H](C(O)=O)CC(N)=O)=O)=O)=O)=O)CCCNC(N)=N)=O)CO)=O)=O)C(C)C)=O)CCCNC(N)=N)=O)=O)=O)=O)[C@@H](C)O)=O)CCC(N)=O)=O)=O)=O)=O)NC(CNC4=O)=O
AGLR01	ORAL	Streptococcus mutans TCI-223	[u'RIBOSOMAL']	[u'CLASS_II_BACTERIOCIN']	2	69_Antimicrobial protein BL-A60	0.545455		MNTRMMEQFETMDAETLSHVTGGGLYDGANGYAYRDSQGHWAYKVTKTPAQALTDVVVNSWASGAASFAAYA
CEAS01	CSF	Streptococcus suis	[u'RIBOSOMAL']	[u'CLASS_II_LANTIPEPTIDE']	2	88_["A-3802-VI-7"]	0.678571	O=C(O)CCC4NC(=O)C(NC(=O)C6NC(=O)C(NC(=O)C(NC(=O)C1NC(=O)C(NC(=O)C(NC(=O)CNC(=O)C(NC(=O)C(NC(=O)C)CSC1)CO)Cc3c[nH]c2ccccc23)C(C)C)C(C)SCC(NC4(=O))C(=O)NCC(=O)NC5C(=O)NC(C(=O)NC(C(=O)NC(C(=O)NC(C(=O)NC(C(=O)OC)CS(=O)C5(C))C)CSC6(C))C(C)CC)C(C)C)CC(C)C)C(C)CC
LTTG01	RESPIRATORY	Rothia sp. HMSC065D02	[u'RIBOSOMAL']	[u'CLASS_II_LANTIPEPTIDE']	4	122_[MUTACIN B-NY266"]	0.642857	C/C=C(C(NCC(NC(C(NC(C(NC(C(NC(C(NC1Cc2ccc(O)cc2)=O)CS/C=C/NC3=O)=O)CC(N)=O)=O)Cc4ccccc4)=O)CSCC3NC1=O)=O)=O)\NC(C(NC(C(NC(C(NC(CNC(C5CCCN56)=O)=O)CSC(C)C(NC(C(NC(C(NC(C(NC(C(N7)CC8=CNc9c8cccc9)=O)=C)=O)Cc%10ccccc%10)=O)CSCC(NC(C(NC(C(Cc%11ccccc%11)N)=O)CCCCN)=O)C7=O)=O)C6=O)=O)C)=O)CCCCN)=O
AHTA01	ORAL	Streptococcus mutans 66-2A	[u'RIBOSOMAL']	[u'CLASS_II_BACTERIOCIN']	7	69_Antimicrobial protein BL-A60	0.545455		TAKPRTNGDGYKGLIHQPNTSKLPDLINGIHAVRNLHYRVITETGLTTADEMLYPSNLVLVDDLVSYHAVGARSVEDQEHRFVASGIDVPTGMAGSNPVFPIIGGVAQLARASGSYPGGRGFDPLRRYKLIMWVFWTFSSAG*MNTKMMEQFETMDTETLSHVTGGGLYDGANGYAYRDSQGHWAYKVTKTPAQALTDVVVNSWASGAASFAAYA
AGLO01	ORAL	Streptococcus mutans TCI-219	[u'RIBOSOMAL']	[u'CLASS_II_BACTERIOCIN']	1	69_Antimicrobial protein BL-A60	0.545455		MNTRMMEQFETMDAETLSHVTGGGLYDGANGYAYRDSQGHWAYKVTKTPAQALTDVVVNSWASGAASFAAYA
LALQ01	NOSE	Staphylococcus aureus	[u'RIBOSOMAL']	[u'CLASS_I_LANTIPEPTIDE']	4	105_["Lanthionine containing peptide","HYICIN M51"]	0.952381	O=C(N)CC5NC(=O)C(NC(=O)C(NC(=O)CNC(=O)C(=CC)NC(=O)C(NC(=O)C(NC(=O)C3NC(=O)CNC(=O)C4N(C(=O)C(NC(=O)C1NC(=O)C(NC(=O)C(=C)NC(=O)C(NC(=O)C(NC(=O)C(=CC)NC(=O)C(N)C(C)CC)CSC1)Cc2ccccc2)CC(C)C)C(C)SC3)CCC4)C)CCCCN)CSCC6NC(=O)C(NC(=O)C(NC5(=O))CSC=CNC6(=O))Cc7ccc(O)cc7)Cc8ccccc8
CDTG01	CSF	Streptococcus suis	[u'RIBOSOMAL']	[u'CLASS_II_LANTIPEPTIDE']	2	88_["A-3802-VI-7"]	0.678571	O=C(O)CCC4NC(=O)C(NC(=O)C6NC(=O)C(NC(=O)C(NC(=O)C1NC(=O)C(NC(=O)C(NC(=O)CNC(=O)C(NC(=O)C(NC(=O)C)CSC1)CO)Cc3c[nH]c2ccccc23)C(C)C)C(C)SCC(NC4(=O))C(=O)NCC(=O)NC5C(=O)NC(C(=O)NC(C(=O)NC(C(=O)NC(C(=O)NC(C(=O)OC)CS(=O)C5(C))C)CSC6(C))C(C)CC)C(C)C)CC(C)C)C(C)CC
LRHI01	SKIN	Streptococcus pyogenes	[u'RIBOSOMAL']	[u'LINEAR_AZOLE_CONTAINING_PEPTIDE']	1	600_["PLANTAZOLICIN B"]	0.789474	O=C(O)C(N=C(O)C1N=C(OC1(C))c2nc(oc2)c3nc(oc3)c4nc(oc4)c5nc(oc5)C(N=C(O)C(N=C(O)c6nc(oc6C)c7nc(oc7C)c%10nc(c8nc(oc8C)c9nc(C(N)CCCNC(=N)N)sc9)sc%10)C(C)CC)C(C)CC)Cc%11ccccc%11
LRHI01	SKIN	Streptococcus pyogenes	[u'RIBOSOMAL']	[u'CLASS_I_LANTIPEPTIDE']	3	124_["STREPTIN"]	1	CC(CC1NC(C(NC(C(NC(C(NC(CNC(C(C(C)C)N)=O)=O)CSCC(C(NC(C(N2CCCC2C(NCC(NC(C(NC(C(NC(C(NC(C(NC(C(NC3C(C)C)=O)CC(C)C)=O)CCCCN)=O)CC4=CNc5c4cccc5)=O)CS6)=O)CSCC(C(NC(C(N/C(C(N/C(C(N/C(C(NC(C(NC(C(O)=O)CCCCN)=O)C(C)C)=O)=C/C)=O)=C/C)=O)=C/C)=O)Cc7ccccc7)=O)NC3=O)=O)=O)=O)C6C)=O)NC1=O)=O)CCCNC(N)=N)=O)Cc8ccc(O)cc8)=O)C
LRHI01	SKIN	Streptococcus pyogenes	[u'RIBOSOMAL']	[u'CLASS_II_LANTIPEPTIDE']	5	121_["SALIVARICIN A"]	0.9375	CCC(C(C(NC(C(NC(C(NC(C(NC(C(NC(C(NC(C(NC(C(N1CCCC1C(NC(C(NC(C(NC(C(NC(C(NC(C(NC2CS3)=O)C(C)C)=O)Cc4ccccc4)=O)C(C)C)=O)CSCC(C(O)=O)NC2=O)=O)CC(N)=O)=O)=O)CS5)=O)CC(O)=O)=O)CC(O)=O)=O)C3C)=O)C(CC)C)=O)C5C)=O)C)=O)NC(C(NC(CNC(C(NC(CNC(C(NC(C(CCCCN)N)=O)CCCNC(N)=N)=O)=O)CO)=O)=O)CC6=CNc7c6cccc7)=O)C
LABO01	STOOL	Bacillus cereus	[u'RIBOSOMAL']	[u'LASSO_PEPTIDE']	5	276_["PRE-T","10381-T","PRE-10381-T"]	0.571429	O=C(N)c3nc4c1nc(oc1C)C(NC(=O)c6nc(C(NC(=O)c2nc(oc2C)CNC(=O)C(NC(=O)c5nc(c4(cc3))sc5)C(C)C)C)sc6)C
LNOU01	STOOL	Enterococcus faecium	[u'RIBOSOMAL']	[u'CLASS_II_BACTERIOCIN']	1	40_Enterocin A	1		MKHLKILSIKETQLIYGGTTHSGKYYGNGVYCTKNKCTVDWAKATTCIAGMSIGGFLGGAIPGKC
LNOU01	STOOL	Enterococcus faecium	[u'RIBOSOMAL']	[u'CLASS_II_BACTERIOCIN']	2	16_Bacteriocin T8	1		MKKKVLKHCVILGILGTCLAGIGTGIKVDAATYYGNGLYCNKEKCWVDWNQAKGEIGKIIVNGWVNHGPWAPRR
LUWG01	URINE	Lactobacillus plantarum	[u'RIBOSOMAL']	[u'CLASS_II_BACTERIOCIN']	2	54_Plantaricin F	1		MLQFEKLQYSRLPQKKLAKISGGFNRGGYNFGKSVRH
LTLN01	SKIN	Staphylococcus sp. HMSC76G03	[u'RIBOSOMAL']	[u'CLASS_I_LANTIPEPTIDE']	3	105_["Lanthionine containing peptide","HYICIN M51"]	0.952381	O=C(N)CC5NC(=O)C(NC(=O)C(NC(=O)CNC(=O)C(=CC)NC(=O)C(NC(=O)C(NC(=O)C3NC(=O)CNC(=O)C4N(C(=O)C(NC(=O)C1NC(=O)C(NC(=O)C(=C)NC(=O)C(NC(=O)C(NC(=O)C(=CC)NC(=O)C(N)C(C)CC)CSC1)Cc2ccccc2)CC(C)C)C(C)SC3)CCC4)C)CCCCN)CSCC6NC(=O)C(NC(=O)C(NC5(=O))CSC=CNC6(=O))Cc7ccc(O)cc7)Cc8ccccc8
JNRW01	STOOL	Escherichia coli 3-073-06_S3_C1	[u'RIBOSOMAL']	[u'LINEAR_AZOLE_CONTAINING_PEPTIDE']	4	601_["MccB17","MICROCIN B17","MICROCIN 17W"]	0.924528	O=C(O)C(N=C(O)C(N=C(O)C(N=C(O)CN=C(O)c1nc(oc1)CN=C(O)CN=C(O)c2nc(oc2)CN=C(O)CN=C(O)C(N=C(O)CN=C(O)CN=C(O)c3nc(oc3)c8nc(CN=C(O)C(N=C(O)C(N=C(O)c7nc(CN=C(O)CN=C(O)c6nc(CN=C(O)CN=C(O)CN=C(O)C(N=C(O)CN=C(O)CN=C(O)c5nc(c4nc(oc4)CN=C(O)CN=C(O)CN=C(O)CN=C(O)CN=C(O)CN=C(O)CN=C(O)CN=C(O)CN=C(O)CN=C(O)C(N=C(O)CN=C(O)C(N)C(C)C)C(C)CC)sc5)CCC(=N)O)sc6)sc7)CO)CC(=N)O)sc8)CC(=N)O)CO)Cc9cnc[nH]9)C(C)CC
JSFY01	URINE	Escherichia coli	[u'RIBOSOMAL']	[u'LINEAR_AZOLE_CONTAINING_PEPTIDE']	1	601_["MccB17","MICROCIN B17","MICROCIN 17W"]	1	O=C(O)C(N=C(O)C(N=C(O)C(N=C(O)CN=C(O)c1nc(oc1)CN=C(O)CN=C(O)c2nc(oc2)CN=C(O)CN=C(O)C(N=C(O)CN=C(O)CN=C(O)c3nc(oc3)c8nc(CN=C(O)C(N=C(O)C(N=C(O)c7nc(CN=C(O)CN=C(O)c6nc(CN=C(O)CN=C(O)CN=C(O)C(N=C(O)CN=C(O)CN=C(O)c5nc(c4nc(oc4)CN=C(O)CN=C(O)CN=C(O)CN=C(O)CN=C(O)CN=C(O)CN=C(O)CN=C(O)CN=C(O)CN=C(O)C(N=C(O)CN=C(O)C(N)C(C)C)C(C)CC)sc5)CCC(=N)O)sc6)sc7)CO)CC(=N)O)sc8)CC(=N)O)CO)Cc9cnc[nH]9)C(C)CC
LRHB01	SKIN	Streptococcus pyogenes	[u'RIBOSOMAL']	[u'LINEAR_AZOLE_CONTAINING_PEPTIDE']	1	600_["PLANTAZOLICIN B"]	0.789474	O=C(O)C(N=C(O)C1N=C(OC1(C))c2nc(oc2)c3nc(oc3)c4nc(oc4)c5nc(oc5)C(N=C(O)C(N=C(O)c6nc(oc6C)c7nc(oc7C)c%10nc(c8nc(oc8C)c9nc(C(N)CCCNC(=N)N)sc9)sc%10)C(C)CC)C(C)CC)Cc%11ccccc%11
LRHB01	SKIN	Streptococcus pyogenes	[u'RIBOSOMAL']	[u'CLASS_II_LANTIPEPTIDE']	2	121_["SALIVARICIN A"]	0.9375	CCC(C(C(NC(C(NC(C(NC(C(NC(C(NC(C(NC(C(NC(C(N1CCCC1C(NC(C(NC(C(NC(C(NC(C(NC(C(NC2CS3)=O)C(C)C)=O)Cc4ccccc4)=O)C(C)C)=O)CSCC(C(O)=O)NC2=O)=O)CC(N)=O)=O)=O)CS5)=O)CC(O)=O)=O)CC(O)=O)=O)C3C)=O)C(CC)C)=O)C5C)=O)C)=O)NC(C(NC(CNC(C(NC(CNC(C(NC(C(CCCCN)N)=O)CCCNC(N)=N)=O)=O)CO)=O)=O)CC6=CNc7c6cccc7)=O)C
LRHB01	SKIN	Streptococcus pyogenes	[u'RIBOSOMAL']	[u'CLASS_I_LANTIPEPTIDE']	3	124_["STREPTIN"]	1	CC(CC1NC(C(NC(C(NC(C(NC(CNC(C(C(C)C)N)=O)=O)CSCC(C(NC(C(N2CCCC2C(NCC(NC(C(NC(C(NC(C(NC(C(NC(C(NC3C(C)C)=O)CC(C)C)=O)CCCCN)=O)CC4=CNc5c4cccc5)=O)CS6)=O)CSCC(C(NC(C(N/C(C(N/C(C(N/C(C(NC(C(NC(C(O)=O)CCCCN)=O)C(C)C)=O)=C/C)=O)=C/C)=O)=C/C)=O)Cc7ccccc7)=O)NC3=O)=O)=O)=O)C6C)=O)NC1=O)=O)CCCNC(N)=N)=O)Cc8ccc(O)cc8)=O)C
CDUF01	CSF	Streptococcus suis	[u'RIBOSOMAL']	[u'CLASS_II_LANTIPEPTIDE']	2	88_["A-3802-VI-7"]	0.678571	O=C(O)CCC4NC(=O)C(NC(=O)C6NC(=O)C(NC(=O)C(NC(=O)C1NC(=O)C(NC(=O)C(NC(=O)CNC(=O)C(NC(=O)C(NC(=O)C)CSC1)CO)Cc3c[nH]c2ccccc23)C(C)C)C(C)SCC(NC4(=O))C(=O)NCC(=O)NC5C(=O)NC(C(=O)NC(C(=O)NC(C(=O)NC(C(=O)NC(C(=O)OC)CS(=O)C5(C))C)CSC6(C))C(C)CC)C(C)C)CC(C)C)C(C)CC
JGRF01	RESPIRATORY	Staphylococcus aureus DAR1083	[u'RIBOSOMAL']	[u'BACTERIAL_HEAD_TO_TAIL_CYCLIZED']	2	595_Syanodin I	0.590909	CC(C[C@@H](C(N[C@H](C(NCC(O)=O)=O)C)=O)NC(CNC([C@@H](NC(CNC([C@@H](NC([C@@H]1CCCN1C([C@@H](NC([C@@H]2CC(NCC(N[C@H](C(N[C@H](C(NCC(NCC(N[C@H](C(N[C@H](C(N2)=O)C(C)C)=O)[C@H](O)C)=O)=O)=O)CO)=O)CC(C)C)=O)=O)=O)C)=O)=O)C)=O)=O)CCC(N)=O)=O)=O)C
LTRU01	URINE	Enterococcus sp. HMSC035B04	[u'RIBOSOMAL']	[u'CLASS_II_BACTERIOCIN']	2	40_Enterocin A	1		MKHLKILSIKETQLIYGGTTHSGKYYGNGVYCTKNKCTVDWAKATTCIAGMSIGGFLGGAIPGKC
AHSU01	ORAL	Streptococcus mutans U2A	[u'RIBOSOMAL']	[u'CLASS_II_LANTIPEPTIDE']	2	127_["VARIACIN"]	0.688889	CCC(C(C(NC(C(NC(C(NC(C(NC(C(NC(C(NC(C(NC(C(NC(C(NC(C(NC(C(NC(C(NC(C(NC(C(N/C1=C/C)=O)Cc2ccccc2)=O)C(C)C)=O)Cc3ccccc3)=O)CCC(N)=O)=O)Cc4ccccc4)=O)CSCC(C(NC(C(O)=O)=C)=O)NC5=O)=O)CC(N)=O)=O)CCSC)=O)Cc6nc[nH]c6)=O)CS7)=O)CCC(O)=O)=O)Cc8nc[nH]c8)=O)CSCC5NC1=O)=O)NC(C(C7C)NC(C9CCCN9C(C(C(CC)C)NC(C(C(C)C)NC(CNC(C(NC(CN)=O)=C)=O)=O)=O)=O)=O)=O)C
AHSU01	ORAL	Streptococcus mutans U2A	[u'RIBOSOMAL']	[u'CLASS_II_BACTERIOCIN']	8	69_Antimicrobial protein BL-A60	0.545455		MNTKMMEQFETMDTETLSHVTGGGLYDGANGYAYRDSQGHWAYKVTKTPAQALTDVVVNSWASGAASFAAYA
AUWT01	RESPIRATORY	Mycobacterium iranicum UM_TJL	[u'RIBOSOMAL']	[u'LASSO_PEPTIDE']	8	280_["Promothiocin A]	0.6	O=C(NC(=C)C(=N)O)c3nc4c1nc(oc1C)C(N=C(O)c6nc(C(N=C(O)c2nc(oc2C)CN=C(O)C(N=C(O)c5nc(c4(cc3))sc5)C(C)C)C)sc6)C
APNR01	RESPIRATORY	Burkholderia pseudomallei MSHR1328	[u'RIBOSOMAL']	[u'LASSO_PEPTIDE']	7	561_["CAPISTRUIN"]	1	O[C@H](C)[C@@H](C(N1CCC[C@H]1C(NCC(N[C@@H](CC2=CC=CC=C2)C(N[C@H](C(N[C@H](C(N3CCC[C@H]3C(N[C@@H](C4)C(N[C@@H](C)C(N[C@H](C(N[C@H](C(N[C@@H]([C@H](CC)C)C(N[C@H](C(N[C@H](C(N[C@@H](CC5=CC=CC=C5)C(NCC(N[C@@H](CC6=CC=CC=C6)C(N[C@H](C(O)=O)CC(N)=O)=O)=O)=O)=O)CCCNC(N)=N)=O)CO)=O)=O)C(C)C)=O)CCCNC(N)=N)=O)=O)=O)=O)[C@@H](C)O)=O)CCC(N)=O)=O)=O)=O)=O)NC(CNC4=O)=O
LTOX01	URINE	Enterococcus sp. HMSC070F12	[u'RIBOSOMAL']	[u'CLASS_II_BACTERIOCIN']	2	40_Enterocin A	1		MKHLKILSIKETQLIYGGTTHSGKYYGNGVYCTKNKCTVDWAKATTCIAGMSIGGFLGGAIPGKC
LTOX01	URINE	Enterococcus sp. HMSC070F12	[u'RIBOSOMAL']	[u'CLASS_II_BACTERIOCIN']	3	16_Bacteriocin T8	1		MKKKVLKHCVILGILGTCLAGIGTGIKVDAATYYGNGLYCNKEKCWVDWNQAKGEIGKIIVNGWVNHGPWAPRR
CDXD01	CSF	Streptococcus suis	[u'RIBOSOMAL']	[u'CLASS_II_LANTIPEPTIDE']	1	88_["A-3802-VI-7"]	0.678571	O=C(O)CCC4NC(=O)C(NC(=O)C6NC(=O)C(NC(=O)C(NC(=O)C1NC(=O)C(NC(=O)C(NC(=O)CNC(=O)C(NC(=O)C(NC(=O)C)CSC1)CO)Cc3c[nH]c2ccccc23)C(C)C)C(C)SCC(NC4(=O))C(=O)NCC(=O)NC5C(=O)NC(C(=O)NC(C(=O)NC(C(=O)NC(C(=O)NC(C(=O)OC)CS(=O)C5(C))C)CSC6(C))C(C)CC)C(C)C)CC(C)C)C(C)CC
LRZR01	RESPIRATORY	Pseudomonas aeruginosa	[u'NONRIBOSOMAL_PEPTIDE']	[u'NRPS']	3	[u'N-1409-A', u'PLUMBEMYCIN-A', u'ALANYLASPARTYL-{2-AMINO-5-PHOSPHORYL-3-PENTENOIC ACID}', u'N-1409-A']	0.999802	O=P(O)(C/C=C\[C@H](C(O)=O)NC([C@H](CC(O)=O)NC([C@H](C)N)=O)=O)O
LRZR01	RESPIRATORY	Pseudomonas aeruginosa	[u'NONRIBOSOMAL_PEPTIDE']	[u'NRPS']	5	[u'MICACOCIDIN-P6']	0.716579	OC1=C(C2=NC(C3SCC(C(O)C(C)(C)C4=NC(C(O)=O)(C)CS4)N3C)CS2)C(CCCCCl)=CC=C1
LEIB01	RESPIRATORY	Pseudomonas aeruginosa	[u'NONRIBOSOMAL_PEPTIDE']	[u'NRPS']	2	[u'CYCLO-[GLY-L-SER-L-PRO-L-DLU]']	0.575472	OCC1NC(=O)CNC(=O)C(CCC(O)=O)NC(=O)C2CCCN2C1=O
LEIB01	RESPIRATORY	Pseudomonas aeruginosa	[u'NONRIBOSOMAL_PEPTIDE']	[u'NRPS']	4	[u'Belactosin C']	0.752716	O=C1O[C@@H](C(NCCC[C@@H](C(O)=O)NC([C@H](C)N)=O)=O)[C@@H]1[C@@H](C)CC
LEIB01	RESPIRATORY	Pseudomonas aeruginosa	[u'NONRIBOSOMAL_PEPTIDE']	[u'NRPS']	7	[u'MICACOCIDIN-P6']	0.765614	OC1=C(C2=NC(C3SCC(C(O)C(C)(C)C4=NC(C(O)=O)(C)CS4)N3C)CS2)C(CCCCCl)=CC=C1
LEIB01	RESPIRATORY	Pseudomonas aeruginosa	[u'NONRIBOSOMAL_PEPTIDE']	[u'NRPS']	8	[u'N-1409-A', u'PLUMBEMYCIN-A', u'ALANYLASPARTYL-{2-AMINO-5-PHOSPHORYL-3-PENTENOIC ACID}', u'N-1409-A']	0.999802	O=P(O)(C/C=C\[C@H](C(O)=O)NC([C@H](CC(O)=O)NC([C@H](C)N)=O)=O)O
LDLU01	RESPIRATORY	Pseudomonas aeruginosa	[u'NONRIBOSOMAL_PEPTIDE']	[u'NRPS']	4	[u'N-1409-A', u'PLUMBEMYCIN-A', u'ALANYLASPARTYL-{2-AMINO-5-PHOSPHORYL-3-PENTENOIC ACID}', u'N-1409-A']	0.999802	O=P(O)(C/C=C\[C@H](C(O)=O)NC([C@H](CC(O)=O)NC([C@H](C)N)=O)=O)O
LDLU01	RESPIRATORY	Pseudomonas aeruginosa	[u'NONRIBOSOMAL_PEPTIDE']	[u'NRPS']	6	[u'Belactosin C']	0.752716	O=C1O[C@@H](C(NCCC[C@@H](C(O)=O)NC([C@H](C)N)=O)=O)[C@@H]1[C@@H](C)CC
LDLU01	RESPIRATORY	Pseudomonas aeruginosa	[u'NONRIBOSOMAL_PEPTIDE']	[u'NRPS']	7	[u'B-3454']	0.751553	O=C(NC(CO)C(NC(CCCNC(C)=O)C(NCCCCN)=O)=O)C(C(O)C(O)=O)NC(C(CCCNC(C)=O)N)=O
LDLU01	RESPIRATORY	Pseudomonas aeruginosa	[u'NONRIBOSOMAL_PEPTIDE']	[u'NRPS']	9	[u'MICACOCIDIN-P6']	0.765614	OC1=C(C2=NC(C3SCC(C(O)C(C)(C)C4=NC(C(O)=O)(C)CS4)N3C)CS2)C(CCCCCl)=CC=C1
ALYV01	ORAL	Streptococcus mutans B24Sm2	[u'NONRIBOSOMAL_PEPTIDE']	[u'NRPS']	11	[u'BEAUVERICIN', u'Beauvericins Beauvericin', u'BEAUVERICIN-C']	1	O=C1N(C)[C@@H](CC2=CC=CC=C2)C(OC(C(C)C)C(N(C)[C@@H](CC3=CC=CC=C3)C(OC(C(C)C)C(N(C)[C@@H](CC4=CC=CC=C4)C(OC1C(C)C)=O)=O)=O)=O)=O
AFPD01	GI	Mycobacterium avium subsp. paratuberculosis Pt144	[u'NONRIBOSOMAL_PEPTIDE']	[u'NRPS']	8	[u'ANTIMYCIN-A9']	0.642321	CCCCC1C(OC(=O)CC2=CC=CC=C2)C(C)OC(=O)C(NC(=O)C2=C(O)C(NC=O)=CC=C2)C(C)OC1=O
AFPD01	GI	Mycobacterium avium subsp. paratuberculosis Pt144	[u'NONRIBOSOMAL_PEPTIDE']	[u'NRPS']	9	[u'EM-5395']	0.607843	O=C1C(NC(CC)=O)C(C)O1
AFPD01	GI	Mycobacterium avium subsp. paratuberculosis Pt144	[u'NONRIBOSOMAL_PEPTIDE']	[u'NRPS']	15	[u'LACTOFERRIN', u'LFCIN', u'LACTOFERRICIN']	0.696364	N=C(N)NCCC[C@H](C)C(N[C@@H](CCCNC(N)=C)C(N[C@@H](C)C(N[C@@H](CC1=CC=CC=C1)C(O)=O)=O)=O)=O
AFPD01	GI	Mycobacterium avium subsp. paratuberculosis Pt144	[u'NONRIBOSOMAL_PEPTIDE']	[u'NRPS']	16	[u'Y-G19Z-F', u'7-Methoxycephalosporin C derivative I', u'OGANOMYCIN-F', u'Y-G19Z-F']	0.607451	O=C1[C@](NC(CCC[C@@H](N)C(O)=O)=O)(OC)[C@]2([H])N1C(C(O)=O)=C(CSC3=NN=C(SCC(O)=O)S3)CS2
AFPD01	GI	Mycobacterium avium subsp. paratuberculosis Pt144	[u'NONRIBOSOMAL_PEPTIDE']	[u'NRPS']	18	[u'EM-5395']	0.607843	O=C1C(NC(CC)=O)C(C)O1
AFPD01	GI	Mycobacterium avium subsp. paratuberculosis Pt144	[u'NONRIBOSOMAL_PEPTIDE']	[u'NRPS']	20	[u'LACTOFERRIN', u'LFCIN', u'LACTOFERRICIN']	0.671475	N=C(N)NCCC[C@H](C)C(N[C@@H](CCCNC(N)=C)C(N[C@@H](C)C(N[C@@H](CC1=CC=CC=C1)C(O)=O)=O)=O)=O
LTRW01	URINE	Streptococcus sp. HMSC034F02	[u'NONRIBOSOMAL_PEPTIDE']	[u'NRPS']	1	[u'BIS-6-FLUOROTRIOSTIN-A']	0.646302	CC(C)C1N(C)C(=O)C2CSSCC(N(C)C(=O)C(C)NC(=O)C(COC1=O)NC(=O)C(N)CC1=CNC3=CC=C(F)C=C13)C(=O)N(C)C(C(C)C)C(=O)OCC(NC(=O)C(N)CC1=CNC3=CC=C(F)C=C13)C(=O)NC(C)C(=O)C2C
LEJA01	RESPIRATORY	Pseudomonas aeruginosa	[u'NONRIBOSOMAL_PEPTIDE']	[u'NRPS']	2	[u'CYCLO-[GLY-L-SER-L-PRO-L-DLU]']	0.575472	OCC1NC(=O)CNC(=O)C(CCC(O)=O)NC(=O)C2CCCN2C1=O
LEJA01	RESPIRATORY	Pseudomonas aeruginosa	[u'NONRIBOSOMAL_PEPTIDE']	[u'NRPS']	8	[u'MICACOCIDIN-P6']	0.765614	OC1=C(C2=NC(C3SCC(C(O)C(C)(C)C4=NC(C(O)=O)(C)CS4)N3C)CS2)C(CCCCCl)=CC=C1
LEJA01	RESPIRATORY	Pseudomonas aeruginosa	[u'NONRIBOSOMAL_PEPTIDE']	[u'NRPS']	9	[u'Belactosin C']	0.752716	O=C1O[C@@H](C(NCCC[C@@H](C(O)=O)NC([C@H](C)N)=O)=O)[C@@H]1[C@@H](C)CC
AHSI01	ORAL	Streptococcus mutans NLML5	[u'NONRIBOSOMAL_PEPTIDE']	[u'NRPS']	9	[u'Belactosin B']	0.607255	O=C([C@H](O)[C@H]([C@@H](C)CC)C(OC)=O)N[C@@H](C1)[C@H]1C[C@@H](C(O)=O)NC([C@H](C)N)=O
LEEW01	RESPIRATORY	Pseudomonas aeruginosa	[u'NONRIBOSOMAL_PEPTIDE']	[u'NRPS']	5	[u'N-1409-A', u'PLUMBEMYCIN-A', u'ALANYLASPARTYL-{2-AMINO-5-PHOSPHORYL-3-PENTENOIC ACID}', u'N-1409-A']	0.999802	O=P(O)(C/C=C\[C@H](C(O)=O)NC([C@H](CC(O)=O)NC([C@H](C)N)=O)=O)O
LEEW01	RESPIRATORY	Pseudomonas aeruginosa	[u'NONRIBOSOMAL_PEPTIDE']	[u'NRPS']	6	[u'FLUVIBACTIN']	1	O=C(N(CCCNC(C1=C(O)C(O)=CC=C1)=O)CCCNC(C2=C(O)C(O)=CC=C2)=O)[C@H]3N=C(O[C@@H]3C)C4=C(O)C(O)=CC=C4
LEEW01	RESPIRATORY	Pseudomonas aeruginosa	[u'NONRIBOSOMAL_PEPTIDE']	[u'NRPS']	7	[u'MICACOCIDIN-P6']	0.765614	OC1=C(C2=NC(C3SCC(C(O)C(C)(C)C4=NC(C(O)=O)(C)CS4)N3C)CS2)C(CCCCCl)=CC=C1
AZHU01	URINE	Pseudomonas aeruginosa VRFPA08	[u'NONRIBOSOMAL_PEPTIDE']	[u'NRPS']	8	[u'B-3454']	0.549839	O=C(NC(CO)C(NC(CCCNC(C)=O)C(NCCCCN)=O)=O)C(C(O)C(O)=O)NC(C(CCCNC(C)=O)N)=O
AZHU01	URINE	Pseudomonas aeruginosa VRFPA08	[u'NONRIBOSOMAL_PEPTIDE']	[u'NRPS']	10	[u'Verticilide A1', u'VERTICILIDE-A1', u'FKI-1033', u'VERTICILIDE', u'VERTICILIDE-A2']	0.999412	CCCCCC1OC(=O)C(C)N(C)C(=O)C(CCCCC)OC(=O)C(C)N(C)C(=O)C(CCCCC)OC(=O)C(C)N(C)C(=O)C(CCCCC)OC(=O)C(C)N(C)C1=O
AZHU01	URINE	Pseudomonas aeruginosa VRFPA08	[u'NONRIBOSOMAL_PEPTIDE']	[u'NRPS']	11	[u'N-1409-A', u'PLUMBEMYCIN-A', u'ALANYLASPARTYL-{2-AMINO-5-PHOSPHORYL-3-PENTENOIC ACID}', u'N-1409-A']	0.607451	O=P(O)(C/C=C\[C@H](C(O)=O)NC([C@H](CC(O)=O)NC([C@H](C)N)=O)=O)O
CCOV01	RESPIRATORY	Pseudomonas aeruginosa	[u'NONRIBOSOMAL_PEPTIDE']	[u'NRPS']	5	[u'CYCLO-[GLY-L-SER-L-PRO-L-DLU]']	0.575472	OCC1NC(=O)CNC(=O)C(CCC(O)=O)NC(=O)C2CCCN2C1=O
CCOV01	RESPIRATORY	Pseudomonas aeruginosa	[u'NONRIBOSOMAL_PEPTIDE']	[u'NRPS']	7	[u'SF-2052-A', u'Formimidoylfortimicin A', u'DACTIMICIN', u'SF-2052', u'SF-2098', u'SF-2127', u'Epidactimicin', u'Antibiotic SF 2052']	0.960784	N=CNCC(N(C)[C@H]([C@@H](OC)[C@@H](O)[C@@H]1N)[C@@H](O)[C@@H]1O[C@H]([C@H](N)CC2)O[C@@H]2[C@@](C)([H])N)=O
CCOV01	RESPIRATORY	Pseudomonas aeruginosa	[u'NONRIBOSOMAL_PEPTIDE']	[u'NRPS']	9	[u'N-1409-A', u'PLUMBEMYCIN-A', u'ALANYLASPARTYL-{2-AMINO-5-PHOSPHORYL-3-PENTENOIC ACID}', u'N-1409-A']	0.999802	O=P(O)(C/C=C\[C@H](C(O)=O)NC([C@H](CC(O)=O)NC([C@H](C)N)=O)=O)O
CCOV01	RESPIRATORY	Pseudomonas aeruginosa	[u'NONRIBOSOMAL_PEPTIDE']	[u'NRPS']	10	[u'N METHYL L ISOLEUCYL L AMICLEONOMYCINYL L GLUTAMINE', u'L MEILE L ACM L GLN']	0.607451	O=C([C@H]([C@@H](C)CC)NC)N[C@@H](CCC1C=CC(N)C=C1)C(NC(CCC(N)=O)C(O)=O)=O
CCOV01	RESPIRATORY	Pseudomonas aeruginosa	[u'NONRIBOSOMAL_PEPTIDE']	[u'NRPS']	11	[u'MICACOCIDIN-P6']	0.765614	OC1=C(C2=NC(C3SCC(C(O)C(C)(C)C4=NC(C(O)=O)(C)CS4)N3C)CS2)C(CCCCCl)=CC=C1
ACWC01	ORAL	Bacillus sp. BT1B_CT2	[u'NONRIBOSOMAL_PEPTIDE']	[u'NRPS']	6	[u'DAPDIAMIDE B']	0.607451	[H]\C(=C(\[H])C(O)=NCC(N)C(O)=NC(C(C)CC)C(O)=O)C(O)=N
ACWC01	ORAL	Bacillus sp. BT1B_CT2	[u'NONRIBOSOMAL_PEPTIDE']	[u'NRPS']	7	[u'Enniatin-E']	0.536424	O=C1N(C)C(C(C)CC)C(OC(C(C)C)C(N(C)C(C(C)C)C(OC(C(C)C)C(N(C)C(CC(C)C)C(OC1C(C)C)=O)=O)=O)=O)=O
LJHL01	RESPIRATORY	Mycobacterium chimaera	[u'NONRIBOSOMAL_PEPTIDE']	[u'NRPS']	16	[u'Antibiotic SS 3', u'SS 3', u'SANSANMYCIN C']	0.633298	[H]\C(N=C(O)C(N=C(O)C(CCS(C)=O)N=C(O)NC(CC1=CNC2=CC=CC=C12)C(O)=O)C(C)N(C)C(=O)C(N)CC1=CC(O)=CC=C1)=C1/CC(O)C(O1)N1C=CC(O)=NC1=O
LJHL01	RESPIRATORY	Mycobacterium chimaera	[u'NONRIBOSOMAL_PEPTIDE']	[u'NRPS']	17	[u'ANTIMYCIN-A9']	0.642321	CCCCC1C(OC(=O)CC2=CC=CC=C2)C(C)OC(=O)C(NC(=O)C2=C(O)C(NC=O)=CC=C2)C(C)OC1=O
LJHL01	RESPIRATORY	Mycobacterium chimaera	[u'NONRIBOSOMAL_PEPTIDE']	[u'NRPS']	20	[u'EM-5395']	0.607843	O=C1C(NC(CC)=O)C(C)O1
LJHL01	RESPIRATORY	Mycobacterium chimaera	[u'NONRIBOSOMAL_PEPTIDE']	[u'NRPS']	21	[u'EM-5395']	0.607843	O=C1C(NC(CC)=O)C(C)O1
LJHL01	RESPIRATORY	Mycobacterium chimaera	[u'NONRIBOSOMAL_PEPTIDE']	[u'NRPS']	22	[u'ANTIMYCIN-A9']	0.642321	CCCCC1C(OC(=O)CC2=CC=CC=C2)C(C)OC(=O)C(NC(=O)C2=C(O)C(NC=O)=CC=C2)C(C)OC1=O
LJHL01	RESPIRATORY	Mycobacterium chimaera	[u'NONRIBOSOMAL_PEPTIDE']	[u'NRPS']	26	[u'Discarine-B']	0.671803	O=C(C(NC(C(C(C)CC)N(C)C)=O)C(C(C)C)O1)NC(CC2=CNC3=C2C=CC=C3)C(N/C=C\C4=CC=C1C=C4)=O
LJHL01	RESPIRATORY	Mycobacterium chimaera	[u'NONRIBOSOMAL_PEPTIDE']	[u'NRPS']	27	[u'BEAUVERICIN', u'Beauvericins Beauvericin', u'BEAUVERICIN-C']	1	O=C1N(C)[C@@H](CC2=CC=CC=C2)C(OC(C(C)C)C(N(C)[C@@H](CC3=CC=CC=C3)C(OC(C(C)C)C(N(C)[C@@H](CC4=CC=CC=C4)C(OC1C(C)C)=O)=O)=O)=O)=O
LRZA01	RESPIRATORY	Pseudomonas aeruginosa	[u'NONRIBOSOMAL_PEPTIDE']	[u'NRPS']	1	[u'PYOVERDIN-PF-CCM2798']	0.644128	C[C@H]([C@H]1C(=O)N[C@H](C(=O)NCCCC[C@@H](C(=O)N[C@H](C(=O)N1)CCCN(C=O)O)NC(=O)[C@H](CCCN(C=O)O)NC(=O)[C@@H](CO)NC(=O)[C@H](CCCN=C(N)N)NC(=O)[C@@H](CO)NC(=O)C2CCNC3N2C4=CC(=C(C=C4C=C3NC(=O)CCC(=O)O)O)O)[C@@H](C)O)O
LRZA01	RESPIRATORY	Pseudomonas aeruginosa	[u'NONRIBOSOMAL_PEPTIDE']	[u'NRPS']	2	[u'CYCLO-[GLY-L-SER-L-PRO-L-DLU]']	0.575472	OCC1NC(=O)CNC(=O)C(CCC(O)=O)NC(=O)C2CCCN2C1=O
LRZA01	RESPIRATORY	Pseudomonas aeruginosa	[u'NONRIBOSOMAL_PEPTIDE']	[u'NRPS']	8	[u'N-1409-A', u'PLUMBEMYCIN-A', u'ALANYLASPARTYL-{2-AMINO-5-PHOSPHORYL-3-PENTENOIC ACID}', u'N-1409-A']	0.999802	O=P(O)(C/C=C\[C@H](C(O)=O)NC([C@H](CC(O)=O)NC([C@H](C)N)=O)=O)O
LRZA01	RESPIRATORY	Pseudomonas aeruginosa	[u'NONRIBOSOMAL_PEPTIDE']	[u'NRPS']	11	[u'MICACOCIDIN-P6']	0.55956	OC1=C(C2=NC(C3SCC(C(O)C(C)(C)C4=NC(C(O)=O)(C)CS4)N3C)CS2)C(CCCCCl)=CC=C1
AGVT01	RESPIRATORY	Fluoribacter dumoffii Tex-KL	[u'NONRIBOSOMAL_PEPTIDE']	[u'NRPS']	3	[u'LACTOFERRIN', u'LFCIN', u'LACTOFERRICIN']	0.671475	N=C(N)NCCC[C@H](C)C(N[C@@H](CCCNC(N)=C)C(N[C@@H](C)C(N[C@@H](CC1=CC=CC=C1)C(O)=O)=O)=O)=O
CCOM01	RESPIRATORY	Pseudomonas aeruginosa	[u'NONRIBOSOMAL_PEPTIDE']	[u'NRPS']	6	[u'CYCLO-[GLY-L-SER-L-PRO-L-DLU]']	0.575472	OCC1NC(=O)CNC(=O)C(CCC(O)=O)NC(=O)C2CCCN2C1=O
CCOM01	RESPIRATORY	Pseudomonas aeruginosa	[u'NONRIBOSOMAL_PEPTIDE']	[u'NRPS']	7	[u'N-1409-A', u'PLUMBEMYCIN-A', u'ALANYLASPARTYL-{2-AMINO-5-PHOSPHORYL-3-PENTENOIC ACID}', u'N-1409-A']	0.999802	O=P(O)(C/C=C\[C@H](C(O)=O)NC([C@H](CC(O)=O)NC([C@H](C)N)=O)=O)O
CCOM01	RESPIRATORY	Pseudomonas aeruginosa	[u'NONRIBOSOMAL_PEPTIDE']	[u'NRPS']	8	[u'MICACOCIDIN-P6']	0.765614	OC1=C(C2=NC(C3SCC(C(O)C(C)(C)C4=NC(C(O)=O)(C)CS4)N3C)CS2)C(CCCCCl)=CC=C1
CCOM01	RESPIRATORY	Pseudomonas aeruginosa	[u'NONRIBOSOMAL_PEPTIDE']	[u'NRPS']	11	[u'SF-2052-A', u'Formimidoylfortimicin A', u'DACTIMICIN', u'SF-2052', u'SF-2098', u'SF-2127', u'Epidactimicin', u'Antibiotic SF 2052']	0.960784	N=CNCC(N(C)[C@H]([C@@H](OC)[C@@H](O)[C@@H]1N)[C@@H](O)[C@@H]1O[C@H]([C@H](N)CC2)O[C@@H]2[C@@](C)([H])N)=O
CCOL01	RESPIRATORY	Pseudomonas aeruginosa	[u'NONRIBOSOMAL_PEPTIDE']	[u'NRPS']	5	[u'CYCLO-[GLY-L-SER-L-PRO-L-DLU]']	0.575472	OCC1NC(=O)CNC(=O)C(CCC(O)=O)NC(=O)C2CCCN2C1=O
CCOL01	RESPIRATORY	Pseudomonas aeruginosa	[u'NONRIBOSOMAL_PEPTIDE']	[u'NRPS']	7	[u'N-1409-A', u'PLUMBEMYCIN-A', u'ALANYLASPARTYL-{2-AMINO-5-PHOSPHORYL-3-PENTENOIC ACID}', u'N-1409-A']	0.999802	O=P(O)(C/C=C\[C@H](C(O)=O)NC([C@H](CC(O)=O)NC([C@H](C)N)=O)=O)O
CCOL01	RESPIRATORY	Pseudomonas aeruginosa	[u'NONRIBOSOMAL_PEPTIDE']	[u'NRPS']	10	[u'MICACOCIDIN-P6']	0.765614	OC1=C(C2=NC(C3SCC(C(O)C(C)(C)C4=NC(C(O)=O)(C)CS4)N3C)CS2)C(CCCCCl)=CC=C1
CCOL01	RESPIRATORY	Pseudomonas aeruginosa	[u'NONRIBOSOMAL_PEPTIDE']	[u'NRPS']	11	[u'SF-2052-A', u'Formimidoylfortimicin A', u'DACTIMICIN', u'SF-2052', u'SF-2098', u'SF-2127', u'Epidactimicin', u'Antibiotic SF 2052']	0.960784	N=CNCC(N(C)[C@H]([C@@H](OC)[C@@H](O)[C@@H]1N)[C@@H](O)[C@@H]1O[C@H]([C@H](N)CC2)O[C@@H]2[C@@](C)([H])N)=O
MAZQ01	RESPIRATORY	Pseudomonas aeruginosa	[u'NONRIBOSOMAL_PEPTIDE']	[u'NRPS']	2	[u'CYCLO-[GLY-L-SER-L-PRO-L-DLU]']	0.575472	OCC1NC(=O)CNC(=O)C(CCC(O)=O)NC(=O)C2CCCN2C1=O
MAZQ01	RESPIRATORY	Pseudomonas aeruginosa	[u'NONRIBOSOMAL_PEPTIDE']	[u'NRPS']	7	[u'N-1409-A', u'PLUMBEMYCIN-A', u'ALANYLASPARTYL-{2-AMINO-5-PHOSPHORYL-3-PENTENOIC ACID}', u'N-1409-A']	0.999802	O=P(O)(C/C=C\[C@H](C(O)=O)NC([C@H](CC(O)=O)NC([C@H](C)N)=O)=O)O
CCON01	RESPIRATORY	Pseudomonas aeruginosa	[u'NONRIBOSOMAL_PEPTIDE']	[u'NRPS']	4	[u'CYCLO-[GLY-L-SER-L-PRO-L-DLU]']	0.575472	OCC1NC(=O)CNC(=O)C(CCC(O)=O)NC(=O)C2CCCN2C1=O
CCON01	RESPIRATORY	Pseudomonas aeruginosa	[u'NONRIBOSOMAL_PEPTIDE']	[u'NRPS']	6	[u'SF-2052-A', u'Formimidoylfortimicin A', u'DACTIMICIN', u'SF-2052', u'SF-2098', u'SF-2127', u'Epidactimicin', u'Antibiotic SF 2052']	0.960784	N=CNCC(N(C)[C@H]([C@@H](OC)[C@@H](O)[C@@H]1N)[C@@H](O)[C@@H]1O[C@H]([C@H](N)CC2)O[C@@H]2[C@@](C)([H])N)=O
CCON01	RESPIRATORY	Pseudomonas aeruginosa	[u'NONRIBOSOMAL_PEPTIDE']	[u'NRPS']	8	[u'MICACOCIDIN-P6']	0.765614	OC1=C(C2=NC(C3SCC(C(O)C(C)(C)C4=NC(C(O)=O)(C)CS4)N3C)CS2)C(CCCCCl)=CC=C1
CCON01	RESPIRATORY	Pseudomonas aeruginosa	[u'NONRIBOSOMAL_PEPTIDE']	[u'NRPS']	9	[u'N-1409-A', u'PLUMBEMYCIN-A', u'ALANYLASPARTYL-{2-AMINO-5-PHOSPHORYL-3-PENTENOIC ACID}', u'N-1409-A']	0.999802	O=P(O)(C/C=C\[C@H](C(O)=O)NC([C@H](CC(O)=O)NC([C@H](C)N)=O)=O)O
CCON01	RESPIRATORY	Pseudomonas aeruginosa	[u'NONRIBOSOMAL_PEPTIDE']	[u'NRPS']	11	[u'N METHYL L ISOLEUCYL L AMICLEONOMYCINYL L GLUTAMINE', u'L MEILE L ACM L GLN']	0.607451	O=C([C@H]([C@@H](C)CC)NC)N[C@@H](CCC1C=CC(N)C=C1)C(NC(CCC(N)=O)C(O)=O)=O
LJEV02	URINE	Serratia marcescens subsp. marcescens	[u'NONRIBOSOMAL_PEPTIDE']	[u'NRPS']	6	[u'LACTOFERRIN', u'LFCIN', u'LACTOFERRICIN']	0.671475	N=C(N)NCCC[C@H](C)C(N[C@@H](CCCNC(N)=C)C(N[C@@H](C)C(N[C@@H](CC1=CC=CC=C1)C(O)=O)=O)=O)=O
LYKE01	RESPIRATORY	Acinetobacter nosocomialis	[u'NONRIBOSOMAL_PEPTIDE']	[u'NRPS']	3	[u'Piperazimycin A', u'SOHBUMYCIN']	0.657397	[H]\C(CC1N=C(O)C2CC(O)CNN2C(=O)COC(=O)C(C)(CO)N=C(O)C2CC(O)CNN2C(=O)C2CC(Cl)CNN2C1=O)=C(\[H])/C(/[H])=C(\[H])C(C)C
LRSF01	RESPIRATORY	Pseudomonas aeruginosa	[u'NONRIBOSOMAL_PEPTIDE']	[u'NRPS']	5	[u'OXACHELIN']	0.52381	O=C(N(CCC1)O)C1NC(CCNC(C(CCCN(O)C=O)NC(C(CO)NC(C2N=C(OC2)C3=CC=CC=C3O)=O)=O)=O)=O
LRSF01	RESPIRATORY	Pseudomonas aeruginosa	[u'NONRIBOSOMAL_PEPTIDE']	[u'NRPS']	8	[u'MICACOCIDIN-P6']	0.765614	OC1=C(C2=NC(C3SCC(C(O)C(C)(C)C4=NC(C(O)=O)(C)CS4)N3C)CS2)C(CCCCCl)=CC=C1
LRSF01	RESPIRATORY	Pseudomonas aeruginosa	[u'NONRIBOSOMAL_PEPTIDE']	[u'NRPS']	9	[u'CYCLO-[GLY-L-SER-L-PRO-L-DLU]']	0.575472	OCC1NC(=O)CNC(=O)C(CCC(O)=O)NC(=O)C2CCCN2C1=O
LDLK01	RESPIRATORY	Pseudomonas aeruginosa	[u'NONRIBOSOMAL_PEPTIDE']	[u'NRPS']	5	[u'CYCLO-[GLY-L-SER-L-PRO-L-DLU]']	0.575472	OCC1NC(=O)CNC(=O)C(CCC(O)=O)NC(=O)C2CCCN2C1=O
LDLK01	RESPIRATORY	Pseudomonas aeruginosa	[u'NONRIBOSOMAL_PEPTIDE']	[u'NRPS']	6	[u'Belactosin C']	0.752716	O=C1O[C@@H](C(NCCC[C@@H](C(O)=O)NC([C@H](C)N)=O)=O)[C@@H]1[C@@H](C)CC
LDLY01	RESPIRATORY	Pseudomonas aeruginosa	[u'NONRIBOSOMAL_PEPTIDE']	[u'NRPS']	5	[u'CYCLO-[GLY-L-SER-L-PRO-L-DLU]']	0.575472	OCC1NC(=O)CNC(=O)C(CCC(O)=O)NC(=O)C2CCCN2C1=O
LDLY01	RESPIRATORY	Pseudomonas aeruginosa	[u'NONRIBOSOMAL_PEPTIDE']	[u'NRPS']	7	[u'MICACOCIDIN-P6']	0.765614	OC1=C(C2=NC(C3SCC(C(O)C(C)(C)C4=NC(C(O)=O)(C)CS4)N3C)CS2)C(CCCCCl)=CC=C1
LDLY01	RESPIRATORY	Pseudomonas aeruginosa	[u'NONRIBOSOMAL_PEPTIDE']	[u'NRPS']	10	[u'FLUVIBACTIN']	1	O=C(N(CCCNC(C1=C(O)C(O)=CC=C1)=O)CCCNC(C2=C(O)C(O)=CC=C2)=O)[C@H]3N=C(O[C@@H]3C)C4=C(O)C(O)=CC=C4
LEGB01	RESPIRATORY	Pseudomonas aeruginosa	[u'NONRIBOSOMAL_PEPTIDE']	[u'NRPS']	2	[u'CYCLO-[GLY-L-SER-L-PRO-L-DLU]']	0.575472	OCC1NC(=O)CNC(=O)C(CCC(O)=O)NC(=O)C2CCCN2C1=O
LEGB01	RESPIRATORY	Pseudomonas aeruginosa	[u'NONRIBOSOMAL_PEPTIDE']	[u'NRPS']	4	[u'N-1409-A', u'PLUMBEMYCIN-A', u'ALANYLASPARTYL-{2-AMINO-5-PHOSPHORYL-3-PENTENOIC ACID}', u'N-1409-A']	0.999802	O=P(O)(C/C=C\[C@H](C(O)=O)NC([C@H](CC(O)=O)NC([C@H](C)N)=O)=O)O
LEGB01	RESPIRATORY	Pseudomonas aeruginosa	[u'NONRIBOSOMAL_PEPTIDE']	[u'NRPS']	5	[u'MICACOCIDIN-P6']	0.765614	OC1=C(C2=NC(C3SCC(C(O)C(C)(C)C4=NC(C(O)=O)(C)CS4)N3C)CS2)C(CCCCCl)=CC=C1
LEGB01	RESPIRATORY	Pseudomonas aeruginosa	[u'NONRIBOSOMAL_PEPTIDE']	[u'NRPS']	7	[u'Belactosin C']	0.752716	O=C1O[C@@H](C(NCCC[C@@H](C(O)=O)NC([C@H](C)N)=O)=O)[C@@H]1[C@@H](C)CC
LEGB01	RESPIRATORY	Pseudomonas aeruginosa	[u'NONRIBOSOMAL_PEPTIDE']	[u'NRPS']	9	[u'FLUVIBACTIN']	1	O=C(N(CCCNC(C1=C(O)C(O)=CC=C1)=O)CCCNC(C2=C(O)C(O)=CC=C2)=O)[C@H]3N=C(O[C@@H]3C)C4=C(O)C(O)=CC=C4
LEJW01	RESPIRATORY	Pseudomonas aeruginosa	[u'NONRIBOSOMAL_PEPTIDE']	[u'NRPS']	3	[u'N-1409-A', u'PLUMBEMYCIN-A', u'ALANYLASPARTYL-{2-AMINO-5-PHOSPHORYL-3-PENTENOIC ACID}', u'N-1409-A']	0.999802	O=P(O)(C/C=C\[C@H](C(O)=O)NC([C@H](CC(O)=O)NC([C@H](C)N)=O)=O)O
LEJW01	RESPIRATORY	Pseudomonas aeruginosa	[u'NONRIBOSOMAL_PEPTIDE']	[u'NRPS']	5	[u'B-3454']	0.751553	O=C(NC(CO)C(NC(CCCNC(C)=O)C(NCCCCN)=O)=O)C(C(O)C(O)=O)NC(C(CCCNC(C)=O)N)=O
LEJW01	RESPIRATORY	Pseudomonas aeruginosa	[u'NONRIBOSOMAL_PEPTIDE']	[u'NRPS']	6	[u'Belactosin C']	0.752716	O=C1O[C@@H](C(NCCC[C@@H](C(O)=O)NC([C@H](C)N)=O)=O)[C@@H]1[C@@H](C)CC
LEJW01	RESPIRATORY	Pseudomonas aeruginosa	[u'NONRIBOSOMAL_PEPTIDE']	[u'NRPS']	8	[u'MICACOCIDIN-P6']	0.765614	OC1=C(C2=NC(C3SCC(C(O)C(C)(C)C4=NC(C(O)=O)(C)CS4)N3C)CS2)C(CCCCCl)=CC=C1
LEJW01	RESPIRATORY	Pseudomonas aeruginosa	[u'NONRIBOSOMAL_PEPTIDE']	[u'NRPS']	9	[u'FLUVIBACTIN']	1	O=C(N(CCCNC(C1=C(O)C(O)=CC=C1)=O)CCCNC(C2=C(O)C(O)=CC=C2)=O)[C@H]3N=C(O[C@@H]3C)C4=C(O)C(O)=CC=C4
CCOQ01	RESPIRATORY	Pseudomonas aeruginosa	[u'NONRIBOSOMAL_PEPTIDE']	[u'NRPS']	5	[u'CYCLO-[GLY-L-SER-L-PRO-L-DLU]']	0.575472	OCC1NC(=O)CNC(=O)C(CCC(O)=O)NC(=O)C2CCCN2C1=O
CCOQ01	RESPIRATORY	Pseudomonas aeruginosa	[u'NONRIBOSOMAL_PEPTIDE']	[u'NRPS']	7	[u'SF-2052-A', u'Formimidoylfortimicin A', u'DACTIMICIN', u'SF-2052', u'SF-2098', u'SF-2127', u'Epidactimicin', u'Antibiotic SF 2052']	0.960784	N=CNCC(N(C)[C@H]([C@@H](OC)[C@@H](O)[C@@H]1N)[C@@H](O)[C@@H]1O[C@H]([C@H](N)CC2)O[C@@H]2[C@@](C)([H])N)=O
CCOQ01	RESPIRATORY	Pseudomonas aeruginosa	[u'NONRIBOSOMAL_PEPTIDE']	[u'NRPS']	9	[u'MICACOCIDIN-P6']	0.765614	OC1=C(C2=NC(C3SCC(C(O)C(C)(C)C4=NC(C(O)=O)(C)CS4)N3C)CS2)C(CCCCCl)=CC=C1
CCOQ01	RESPIRATORY	Pseudomonas aeruginosa	[u'NONRIBOSOMAL_PEPTIDE']	[u'NRPS']	10	[u'N-1409-A', u'PLUMBEMYCIN-A', u'ALANYLASPARTYL-{2-AMINO-5-PHOSPHORYL-3-PENTENOIC ACID}', u'N-1409-A']	0.999802	O=P(O)(C/C=C\[C@H](C(O)=O)NC([C@H](CC(O)=O)NC([C@H](C)N)=O)=O)O
CCOQ01	RESPIRATORY	Pseudomonas aeruginosa	[u'NONRIBOSOMAL_PEPTIDE']	[u'NRPS']	11	[u'N METHYL L ISOLEUCYL L AMICLEONOMYCINYL L GLUTAMINE', u'L MEILE L ACM L GLN']	0.607451	O=C([C@H]([C@@H](C)CC)NC)N[C@@H](CCC1C=CC(N)C=C1)C(NC(CCC(N)=O)C(O)=O)=O
LKPW01	RESPIRATORY	Pseudomonas aeruginosa	[u'NONRIBOSOMAL_PEPTIDE']	[u'NRPS']	6	[u'MICACOCIDIN-P6']	0.765614	OC1=C(C2=NC(C3SCC(C(O)C(C)(C)C4=NC(C(O)=O)(C)CS4)N3C)CS2)C(CCCCCl)=CC=C1
LKPW01	RESPIRATORY	Pseudomonas aeruginosa	[u'NONRIBOSOMAL_PEPTIDE']	[u'NRPS']	8	[u'N-1409-A', u'PLUMBEMYCIN-A', u'ALANYLASPARTYL-{2-AMINO-5-PHOSPHORYL-3-PENTENOIC ACID}', u'N-1409-A']	0.999802	O=P(O)(C/C=C\[C@H](C(O)=O)NC([C@H](CC(O)=O)NC([C@H](C)N)=O)=O)O
LKPW01	RESPIRATORY	Pseudomonas aeruginosa	[u'NONRIBOSOMAL_PEPTIDE']	[u'NRPS']	10	[u'CYCLO-[GLY-L-SER-L-PRO-L-DLU]']	0.575472	OCC1NC(=O)CNC(=O)C(CCC(O)=O)NC(=O)C2CCCN2C1=O
AWNJ01	RESPIRATORY	Mycobacterium avium subsp. hominissuis 3388	[u'NONRIBOSOMAL_PEPTIDE']	[u'NRPS']	13	[u'ANTIMYCIN-A9']	0.642321	CCCCC1C(OC(=O)CC2=CC=CC=C2)C(C)OC(=O)C(NC(=O)C2=C(O)C(NC=O)=CC=C2)C(C)OC1=O
AWNJ01	RESPIRATORY	Mycobacterium avium subsp. hominissuis 3388	[u'NONRIBOSOMAL_PEPTIDE']	[u'NRPS']	15	[u'EM-5395']	0.607843	O=C1C(NC(CC)=O)C(C)O1
AWNJ01	RESPIRATORY	Mycobacterium avium subsp. hominissuis 3388	[u'NONRIBOSOMAL_PEPTIDE']	[u'NRPS']	16	[u'EM-5395']	0.607843	O=C1C(NC(CC)=O)C(C)O1
AWNJ01	RESPIRATORY	Mycobacterium avium subsp. hominissuis 3388	[u'NONRIBOSOMAL_PEPTIDE']	[u'NRPS']	18	[u'SANSANMYCIN E']	0.715682	[H]\C(N=C(O)C(N=C(O)C(CCS(C)=O)N=C(O)NC(CC1=CC(O)=CC=C1)C(O)=O)C(C)N(C)C(=O)C(N)CC1=CC(O)=CC=C1)=C1\CC(O)C(O1)N1C=CC(O)=NC1=O
AWNJ01	RESPIRATORY	Mycobacterium avium subsp. hominissuis 3388	[u'NONRIBOSOMAL_PEPTIDE']	[u'NRPS']	19	[u'ANTIMYCIN-A9']	0.642321	CCCCC1C(OC(=O)CC2=CC=CC=C2)C(C)OC(=O)C(NC(=O)C2=C(O)C(NC=O)=CC=C2)C(C)OC1=O
LRZQ01	RESPIRATORY	Pseudomonas aeruginosa	[u'NONRIBOSOMAL_PEPTIDE']	[u'NRPS']	3	[u'CYCLO-[GLY-L-SER-L-PRO-L-DLU]']	0.575472	OCC1NC(=O)CNC(=O)C(CCC(O)=O)NC(=O)C2CCCN2C1=O
LEJM01	RESPIRATORY	Pseudomonas aeruginosa	[u'NONRIBOSOMAL_PEPTIDE']	[u'NRPS']	5	[u'N-1409-A', u'PLUMBEMYCIN-A', u'ALANYLASPARTYL-{2-AMINO-5-PHOSPHORYL-3-PENTENOIC ACID}', u'N-1409-A']	0.999802	O=P(O)(C/C=C\[C@H](C(O)=O)NC([C@H](CC(O)=O)NC([C@H](C)N)=O)=O)O
LEJM01	RESPIRATORY	Pseudomonas aeruginosa	[u'NONRIBOSOMAL_PEPTIDE']	[u'NRPS']	6	[u'Belactosin C']	0.752716	O=C1O[C@@H](C(NCCC[C@@H](C(O)=O)NC([C@H](C)N)=O)=O)[C@@H]1[C@@H](C)CC
LEJM01	RESPIRATORY	Pseudomonas aeruginosa	[u'NONRIBOSOMAL_PEPTIDE']	[u'NRPS']	8	[u'MICACOCIDIN-P6']	0.765614	OC1=C(C2=NC(C3SCC(C(O)C(C)(C)C4=NC(C(O)=O)(C)CS4)N3C)CS2)C(CCCCCl)=CC=C1
LEJM01	RESPIRATORY	Pseudomonas aeruginosa	[u'NONRIBOSOMAL_PEPTIDE']	[u'NRPS']	9	[u'B-3454']	0.751553	O=C(NC(CO)C(NC(CCCNC(C)=O)C(NCCCCN)=O)=O)C(C(O)C(O)=O)NC(C(CCCNC(C)=O)N)=O
LAUB02	RESPIRATORY	Burkholderia pseudomallei	[u'NONRIBOSOMAL_PEPTIDE']	[u'NRPS']	6	[u'Belactosin C']	0.752716	O=C1O[C@@H](C(NCCC[C@@H](C(O)=O)NC([C@H](C)N)=O)=O)[C@@H]1[C@@H](C)CC
LAUB02	RESPIRATORY	Burkholderia pseudomallei	[u'NONRIBOSOMAL_PEPTIDE']	[u'NRPS']	15	[u'Clavamycin C']	0.71939	O=C(C1)N2[C@@]1([H])O[C@@H]([C@H](O)C(C(O)=O)NC(C(N)C(O)C(CN)O)=O)C2
LAUB02	RESPIRATORY	Burkholderia pseudomallei	[u'NONRIBOSOMAL_PEPTIDE']	[u'NRPS']	17	[u'MICACOCIDIN-P6']	0.73457	OC1=C(C2=NC(C3SCC(C(O)C(C)(C)C4=NC(C(O)=O)(C)CS4)N3C)CS2)C(CCCCCl)=CC=C1
LDKL01	RESPIRATORY	Pseudomonas aeruginosa	[u'NONRIBOSOMAL_PEPTIDE']	[u'NRPS']	5	[u'FLUVIBACTIN']	1	O=C(N(CCCNC(C1=C(O)C(O)=CC=C1)=O)CCCNC(C2=C(O)C(O)=CC=C2)=O)[C@H]3N=C(O[C@@H]3C)C4=C(O)C(O)=CC=C4
LDKL01	RESPIRATORY	Pseudomonas aeruginosa	[u'NONRIBOSOMAL_PEPTIDE']	[u'NRPS']	7	[u'Belactosin C']	0.752716	O=C1O[C@@H](C(NCCC[C@@H](C(O)=O)NC([C@H](C)N)=O)=O)[C@@H]1[C@@H](C)CC
LDKL01	RESPIRATORY	Pseudomonas aeruginosa	[u'NONRIBOSOMAL_PEPTIDE']	[u'NRPS']	9	[u'N-1409-A', u'PLUMBEMYCIN-A', u'ALANYLASPARTYL-{2-AMINO-5-PHOSPHORYL-3-PENTENOIC ACID}', u'N-1409-A']	0.999802	O=P(O)(C/C=C\[C@H](C(O)=O)NC([C@H](CC(O)=O)NC([C@H](C)N)=O)=O)O
LDKL01	RESPIRATORY	Pseudomonas aeruginosa	[u'NONRIBOSOMAL_PEPTIDE']	[u'NRPS']	10	[u'MICACOCIDIN-P6']	0.765614	OC1=C(C2=NC(C3SCC(C(O)C(C)(C)C4=NC(C(O)=O)(C)CS4)N3C)CS2)C(CCCCCl)=CC=C1
LEJJ01	RESPIRATORY	Pseudomonas aeruginosa	[u'NONRIBOSOMAL_PEPTIDE']	[u'NRPS']	5	[u'CYCLO-[GLY-L-SER-L-PRO-L-DLU]']	0.575472	OCC1NC(=O)CNC(=O)C(CCC(O)=O)NC(=O)C2CCCN2C1=O
LEJJ01	RESPIRATORY	Pseudomonas aeruginosa	[u'NONRIBOSOMAL_PEPTIDE']	[u'NRPS']	7	[u'MICACOCIDIN-P6']	0.765614	OC1=C(C2=NC(C3SCC(C(O)C(C)(C)C4=NC(C(O)=O)(C)CS4)N3C)CS2)C(CCCCCl)=CC=C1
LEJJ01	RESPIRATORY	Pseudomonas aeruginosa	[u'NONRIBOSOMAL_PEPTIDE']	[u'NRPS']	8	[u'FLUVIBACTIN']	1	O=C(N(CCCNC(C1=C(O)C(O)=CC=C1)=O)CCCNC(C2=C(O)C(O)=CC=C2)=O)[C@H]3N=C(O[C@@H]3C)C4=C(O)C(O)=CC=C4
LDMU01	RESPIRATORY	Pseudomonas aeruginosa	[u'NONRIBOSOMAL_PEPTIDE']	[u'NRPS']	5	[u'MICACOCIDIN-P6']	0.765614	OC1=C(C2=NC(C3SCC(C(O)C(C)(C)C4=NC(C(O)=O)(C)CS4)N3C)CS2)C(CCCCCl)=CC=C1
LDMU01	RESPIRATORY	Pseudomonas aeruginosa	[u'NONRIBOSOMAL_PEPTIDE']	[u'NRPS']	6	[u'N-1409-A', u'PLUMBEMYCIN-A', u'ALANYLASPARTYL-{2-AMINO-5-PHOSPHORYL-3-PENTENOIC ACID}', u'N-1409-A']	0.999802	O=P(O)(C/C=C\[C@H](C(O)=O)NC([C@H](CC(O)=O)NC([C@H](C)N)=O)=O)O
LEGX01	RESPIRATORY	Pseudomonas aeruginosa	[u'NONRIBOSOMAL_PEPTIDE']	[u'NRPS']	2	[u'N-1409-A', u'PLUMBEMYCIN-A', u'ALANYLASPARTYL-{2-AMINO-5-PHOSPHORYL-3-PENTENOIC ACID}', u'N-1409-A']	0.999802	O=P(O)(C/C=C\[C@H](C(O)=O)NC([C@H](CC(O)=O)NC([C@H](C)N)=O)=O)O
LEGX01	RESPIRATORY	Pseudomonas aeruginosa	[u'NONRIBOSOMAL_PEPTIDE']	[u'NRPS']	4	[u'MICACOCIDIN-P6']	0.765614	OC1=C(C2=NC(C3SCC(C(O)C(C)(C)C4=NC(C(O)=O)(C)CS4)N3C)CS2)C(CCCCCl)=CC=C1
LEGX01	RESPIRATORY	Pseudomonas aeruginosa	[u'NONRIBOSOMAL_PEPTIDE']	[u'NRPS']	8	[u'B-3454']	0.751553	O=C(NC(CO)C(NC(CCCNC(C)=O)C(NCCCCN)=O)=O)C(C(O)C(O)=O)NC(C(CCCNC(C)=O)N)=O
LEHT01	RESPIRATORY	Pseudomonas aeruginosa	[u'NONRIBOSOMAL_PEPTIDE']	[u'NRPS']	3	[u'Belactosin C']	0.752716	O=C1O[C@@H](C(NCCC[C@@H](C(O)=O)NC([C@H](C)N)=O)=O)[C@@H]1[C@@H](C)CC
LEHT01	RESPIRATORY	Pseudomonas aeruginosa	[u'NONRIBOSOMAL_PEPTIDE']	[u'NRPS']	5	[u'CYCLO-[GLY-L-SER-L-PRO-L-DLU]']	0.575472	OCC1NC(=O)CNC(=O)C(CCC(O)=O)NC(=O)C2CCCN2C1=O
LEHT01	RESPIRATORY	Pseudomonas aeruginosa	[u'NONRIBOSOMAL_PEPTIDE']	[u'NRPS']	7	[u'N-1409-A', u'PLUMBEMYCIN-A', u'ALANYLASPARTYL-{2-AMINO-5-PHOSPHORYL-3-PENTENOIC ACID}', u'N-1409-A']	0.999802	O=P(O)(C/C=C\[C@H](C(O)=O)NC([C@H](CC(O)=O)NC([C@H](C)N)=O)=O)O
LEHT01	RESPIRATORY	Pseudomonas aeruginosa	[u'NONRIBOSOMAL_PEPTIDE']	[u'NRPS']	8	[u'MICACOCIDIN-P6']	0.765614	OC1=C(C2=NC(C3SCC(C(O)C(C)(C)C4=NC(C(O)=O)(C)CS4)N3C)CS2)C(CCCCCl)=CC=C1
LEHT01	RESPIRATORY	Pseudomonas aeruginosa	[u'NONRIBOSOMAL_PEPTIDE']	[u'NRPS']	10	[u'FLUVIBACTIN']	1	O=C(N(CCCNC(C1=C(O)C(O)=CC=C1)=O)CCCNC(C2=C(O)C(O)=CC=C2)=O)[C@H]3N=C(O[C@@H]3C)C4=C(O)C(O)=CC=C4
LCSZ01	RESPIRATORY	Pseudomonas aeruginosa	[u'NONRIBOSOMAL_PEPTIDE']	[u'NRPS']	6	[u'N-1409-A', u'PLUMBEMYCIN-A', u'ALANYLASPARTYL-{2-AMINO-5-PHOSPHORYL-3-PENTENOIC ACID}', u'N-1409-A']	0.999802	O=P(O)(C/C=C\[C@H](C(O)=O)NC([C@H](CC(O)=O)NC([C@H](C)N)=O)=O)O
LCSZ01	RESPIRATORY	Pseudomonas aeruginosa	[u'NONRIBOSOMAL_PEPTIDE']	[u'NRPS']	7	[u'FLUVIBACTIN']	0.910714	O=C(N(CCCNC(C1=C(O)C(O)=CC=C1)=O)CCCNC(C2=C(O)C(O)=CC=C2)=O)[C@H]3N=C(O[C@@H]3C)C4=C(O)C(O)=CC=C4
LCSZ01	RESPIRATORY	Pseudomonas aeruginosa	[u'NONRIBOSOMAL_PEPTIDE']	[u'NRPS']	10	[u'MICACOCIDIN-P6']	0.765614	OC1=C(C2=NC(C3SCC(C(O)C(C)(C)C4=NC(C(O)=O)(C)CS4)N3C)CS2)C(CCCCCl)=CC=C1
LEEY01	RESPIRATORY	Pseudomonas aeruginosa	[u'NONRIBOSOMAL_PEPTIDE']	[u'NRPS']	5	[u'Belactosin C']	0.752716	O=C1O[C@@H](C(NCCC[C@@H](C(O)=O)NC([C@H](C)N)=O)=O)[C@@H]1[C@@H](C)CC
MBMQ01	RESPIRATORY	Pseudomonas aeruginosa	[u'NONRIBOSOMAL_PEPTIDE']	[u'NRPS']	3	[u'CYCLO-[GLY-L-SER-L-PRO-L-DLU]']	0.575472	OCC1NC(=O)CNC(=O)C(CCC(O)=O)NC(=O)C2CCCN2C1=O
MBMQ01	RESPIRATORY	Pseudomonas aeruginosa	[u'NONRIBOSOMAL_PEPTIDE']	[u'NRPS']	9	[u'Belactosin C']	0.752716	O=C1O[C@@H](C(NCCC[C@@H](C(O)=O)NC([C@H](C)N)=O)=O)[C@@H]1[C@@H](C)CC
MBMQ01	RESPIRATORY	Pseudomonas aeruginosa	[u'NONRIBOSOMAL_PEPTIDE']	[u'NRPS']	10	[u'Belactosin B']	0.999703	O=C([C@H](O)[C@H]([C@@H](C)CC)C(OC)=O)N[C@@H](C1)[C@H]1C[C@@H](C(O)=O)NC([C@H](C)N)=O
LEJQ01	RESPIRATORY	Pseudomonas aeruginosa	[u'NONRIBOSOMAL_PEPTIDE']	[u'NRPS']	6	[u'MICACOCIDIN-P6']	0.765614	OC1=C(C2=NC(C3SCC(C(O)C(C)(C)C4=NC(C(O)=O)(C)CS4)N3C)CS2)C(CCCCCl)=CC=C1
LEJQ01	RESPIRATORY	Pseudomonas aeruginosa	[u'NONRIBOSOMAL_PEPTIDE']	[u'NRPS']	7	[u'FLUVIBACTIN']	0.910714	O=C(N(CCCNC(C1=C(O)C(O)=CC=C1)=O)CCCNC(C2=C(O)C(O)=CC=C2)=O)[C@H]3N=C(O[C@@H]3C)C4=C(O)C(O)=CC=C4
LEJQ01	RESPIRATORY	Pseudomonas aeruginosa	[u'NONRIBOSOMAL_PEPTIDE']	[u'NRPS']	9	[u'N-1409-A', u'PLUMBEMYCIN-A', u'ALANYLASPARTYL-{2-AMINO-5-PHOSPHORYL-3-PENTENOIC ACID}', u'N-1409-A']	0.999802	O=P(O)(C/C=C\[C@H](C(O)=O)NC([C@H](CC(O)=O)NC([C@H](C)N)=O)=O)O
LEFH01	RESPIRATORY	Pseudomonas aeruginosa	[u'NONRIBOSOMAL_PEPTIDE']	[u'NRPS']	2	[u'CYCLO-[GLY-L-SER-L-PRO-L-DLU]']	0.575472	OCC1NC(=O)CNC(=O)C(CCC(O)=O)NC(=O)C2CCCN2C1=O
LEFH01	RESPIRATORY	Pseudomonas aeruginosa	[u'NONRIBOSOMAL_PEPTIDE']	[u'NRPS']	3	[u'N-1409-A', u'PLUMBEMYCIN-A', u'ALANYLASPARTYL-{2-AMINO-5-PHOSPHORYL-3-PENTENOIC ACID}', u'N-1409-A']	0.557308	O=P(O)(C/C=C\[C@H](C(O)=O)NC([C@H](CC(O)=O)NC([C@H](C)N)=O)=O)O
LEFH01	RESPIRATORY	Pseudomonas aeruginosa	[u'NONRIBOSOMAL_PEPTIDE']	[u'NRPS']	6	[u'Belactosin C']	0.752716	O=C1O[C@@H](C(NCCC[C@@H](C(O)=O)NC([C@H](C)N)=O)=O)[C@@H]1[C@@H](C)CC
LEFH01	RESPIRATORY	Pseudomonas aeruginosa	[u'NONRIBOSOMAL_PEPTIDE']	[u'NRPS']	8	[u'B-3454']	0.751553	O=C(NC(CO)C(NC(CCCNC(C)=O)C(NCCCCN)=O)=O)C(C(O)C(O)=O)NC(C(CCCNC(C)=O)N)=O
LRZO01	RESPIRATORY	Pseudomonas aeruginosa	[u'NONRIBOSOMAL_PEPTIDE']	[u'NRPS']	3	[u'N-1409-A', u'PLUMBEMYCIN-A', u'ALANYLASPARTYL-{2-AMINO-5-PHOSPHORYL-3-PENTENOIC ACID}', u'N-1409-A']	0.999802	O=P(O)(C/C=C\[C@H](C(O)=O)NC([C@H](CC(O)=O)NC([C@H](C)N)=O)=O)O
LRZO01	RESPIRATORY	Pseudomonas aeruginosa	[u'NONRIBOSOMAL_PEPTIDE']	[u'NRPS']	4	[u'Belactosin C']	0.752716	O=C1O[C@@H](C(NCCC[C@@H](C(O)=O)NC([C@H](C)N)=O)=O)[C@@H]1[C@@H](C)CC
LRZO01	RESPIRATORY	Pseudomonas aeruginosa	[u'NONRIBOSOMAL_PEPTIDE']	[u'NRPS']	9	[u'MICACOCIDIN-P6']	0.716579	OC1=C(C2=NC(C3SCC(C(O)C(C)(C)C4=NC(C(O)=O)(C)CS4)N3C)CS2)C(CCCCCl)=CC=C1
LRZO01	RESPIRATORY	Pseudomonas aeruginosa	[u'NONRIBOSOMAL_PEPTIDE']	[u'NRPS']	10	[u'FLUVIBACTIN']	1	O=C(N(CCCNC(C1=C(O)C(O)=CC=C1)=O)CCCNC(C2=C(O)C(O)=CC=C2)=O)[C@H]3N=C(O[C@@H]3C)C4=C(O)C(O)=CC=C4
LEIC01	RESPIRATORY	Pseudomonas aeruginosa	[u'NONRIBOSOMAL_PEPTIDE']	[u'NRPS']	3	[u'MICACOCIDIN-P6']	0.765614	OC1=C(C2=NC(C3SCC(C(O)C(C)(C)C4=NC(C(O)=O)(C)CS4)N3C)CS2)C(CCCCCl)=CC=C1
LEIC01	RESPIRATORY	Pseudomonas aeruginosa	[u'NONRIBOSOMAL_PEPTIDE']	[u'NRPS']	5	[u'N-1409-A', u'PLUMBEMYCIN-A', u'ALANYLASPARTYL-{2-AMINO-5-PHOSPHORYL-3-PENTENOIC ACID}', u'N-1409-A']	0.999802	O=P(O)(C/C=C\[C@H](C(O)=O)NC([C@H](CC(O)=O)NC([C@H](C)N)=O)=O)O
LEIC01	RESPIRATORY	Pseudomonas aeruginosa	[u'NONRIBOSOMAL_PEPTIDE']	[u'NRPS']	8	[u'FLUVIBACTIN']	1	O=C(N(CCCNC(C1=C(O)C(O)=CC=C1)=O)CCCNC(C2=C(O)C(O)=CC=C2)=O)[C@H]3N=C(O[C@@H]3C)C4=C(O)C(O)=CC=C4
LEIN01	RESPIRATORY	Pseudomonas aeruginosa	[u'NONRIBOSOMAL_PEPTIDE']	[u'NRPS']	6	[u'MICACOCIDIN-P6']	0.765614	OC1=C(C2=NC(C3SCC(C(O)C(C)(C)C4=NC(C(O)=O)(C)CS4)N3C)CS2)C(CCCCCl)=CC=C1
LEIN01	RESPIRATORY	Pseudomonas aeruginosa	[u'NONRIBOSOMAL_PEPTIDE']	[u'NRPS']	8	[u'N-1409-A', u'PLUMBEMYCIN-A', u'ALANYLASPARTYL-{2-AMINO-5-PHOSPHORYL-3-PENTENOIC ACID}', u'N-1409-A']	0.999802	O=P(O)(C/C=C\[C@H](C(O)=O)NC([C@H](CC(O)=O)NC([C@H](C)N)=O)=O)O
LEFR01	RESPIRATORY	Pseudomonas aeruginosa	[u'NONRIBOSOMAL_PEPTIDE']	[u'NRPS']	3	[u'CYCLO-[GLY-L-SER-L-PRO-L-DLU]']	0.575472	OCC1NC(=O)CNC(=O)C(CCC(O)=O)NC(=O)C2CCCN2C1=O
LEFR01	RESPIRATORY	Pseudomonas aeruginosa	[u'NONRIBOSOMAL_PEPTIDE']	[u'NRPS']	6	[u'MICACOCIDIN-P6']	0.765614	OC1=C(C2=NC(C3SCC(C(O)C(C)(C)C4=NC(C(O)=O)(C)CS4)N3C)CS2)C(CCCCCl)=CC=C1
LEFR01	RESPIRATORY	Pseudomonas aeruginosa	[u'NONRIBOSOMAL_PEPTIDE']	[u'NRPS']	7	[u'N-1409-A', u'PLUMBEMYCIN-A', u'ALANYLASPARTYL-{2-AMINO-5-PHOSPHORYL-3-PENTENOIC ACID}', u'N-1409-A']	0.999802	O=P(O)(C/C=C\[C@H](C(O)=O)NC([C@H](CC(O)=O)NC([C@H](C)N)=O)=O)O
LEFR01	RESPIRATORY	Pseudomonas aeruginosa	[u'NONRIBOSOMAL_PEPTIDE']	[u'NRPS']	10	[u'FLUVIBACTIN']	1	O=C(N(CCCNC(C1=C(O)C(O)=CC=C1)=O)CCCNC(C2=C(O)C(O)=CC=C2)=O)[C@H]3N=C(O[C@@H]3C)C4=C(O)C(O)=CC=C4
AHSJ01	ORAL	Streptococcus mutans NLML9	[u'NONRIBOSOMAL_PEPTIDE']	[u'NRPS']	5	[u'3 Hydroxy 2,5 dimethyl 4 (((methyl aci nitro)acetyl)amino)hexanoic acid, 9CI', u'NITRACIDOMYCIN A']	0.753086	[H]C(C(O)=NC(C(C)C)C(O)C(C)C(O)=O)=N(=O)OC
LDKQ01	RESPIRATORY	Pseudomonas aeruginosa	[u'NONRIBOSOMAL_PEPTIDE']	[u'NRPS']	3	[u'CYCLO-[GLY-L-SER-L-PRO-L-DLU]']	0.575472	OCC1NC(=O)CNC(=O)C(CCC(O)=O)NC(=O)C2CCCN2C1=O
LDKQ01	RESPIRATORY	Pseudomonas aeruginosa	[u'NONRIBOSOMAL_PEPTIDE']	[u'NRPS']	7	[u'N-1409-A', u'PLUMBEMYCIN-A', u'ALANYLASPARTYL-{2-AMINO-5-PHOSPHORYL-3-PENTENOIC ACID}', u'N-1409-A']	0.999802	O=P(O)(C/C=C\[C@H](C(O)=O)NC([C@H](CC(O)=O)NC([C@H](C)N)=O)=O)O
LDKQ01	RESPIRATORY	Pseudomonas aeruginosa	[u'NONRIBOSOMAL_PEPTIDE']	[u'NRPS']	8	[u'MICACOCIDIN-P6']	0.765614	OC1=C(C2=NC(C3SCC(C(O)C(C)(C)C4=NC(C(O)=O)(C)CS4)N3C)CS2)C(CCCCCl)=CC=C1
LCTC01	RESPIRATORY	Pseudomonas aeruginosa	[u'NONRIBOSOMAL_PEPTIDE']	[u'NRPS']	5	[u'CYCLO-[GLY-L-SER-L-PRO-L-DLU]']	0.575472	OCC1NC(=O)CNC(=O)C(CCC(O)=O)NC(=O)C2CCCN2C1=O
LCTC01	RESPIRATORY	Pseudomonas aeruginosa	[u'NONRIBOSOMAL_PEPTIDE']	[u'NRPS']	6	[u'MICACOCIDIN-P6']	0.765614	OC1=C(C2=NC(C3SCC(C(O)C(C)(C)C4=NC(C(O)=O)(C)CS4)N3C)CS2)C(CCCCCl)=CC=C1
JDVE01	RESPIRATORY	Pseudomonas aeruginosa CF_PA39	[u'NONRIBOSOMAL_PEPTIDE']	[u'NRPS']	7	[u'Belactosin C']	0.752716	O=C1O[C@@H](C(NCCC[C@@H](C(O)=O)NC([C@H](C)N)=O)=O)[C@@H]1[C@@H](C)CC
JDVE01	RESPIRATORY	Pseudomonas aeruginosa CF_PA39	[u'NONRIBOSOMAL_PEPTIDE']	[u'NRPS']	9	[u'MICACOCIDIN-P6']	0.765614	OC1=C(C2=NC(C3SCC(C(O)C(C)(C)C4=NC(C(O)=O)(C)CS4)N3C)CS2)C(CCCCCl)=CC=C1
JDVE01	RESPIRATORY	Pseudomonas aeruginosa CF_PA39	[u'NONRIBOSOMAL_PEPTIDE']	[u'NRPS']	11	[u'N-1409-A', u'PLUMBEMYCIN-A', u'ALANYLASPARTYL-{2-AMINO-5-PHOSPHORYL-3-PENTENOIC ACID}', u'N-1409-A']	0.999802	O=P(O)(C/C=C\[C@H](C(O)=O)NC([C@H](CC(O)=O)NC([C@H](C)N)=O)=O)O
JMMV01	RESPIRATORY	Burkholderia pseudomallei MSHR5855	[u'NONRIBOSOMAL_PEPTIDE']	[u'NRPS']	3	[u'Mureidomycin-F', u'NAPSAMYCIN-A']	0.633508	O=C(NC1=O)N(C=C1)C(C(O)C/2)OC2=C/NC(C(C(C)N(C)C(C3NCC4=C(C=C(O)C=C4)C3)=O)NC(C(CCSC)NC(NC(CC5=CC(O)=CC=C5)C(O)=O)=O)=O)=O
JMMV01	RESPIRATORY	Burkholderia pseudomallei MSHR5855	[u'NONRIBOSOMAL_PEPTIDE']	[u'NRPS']	6	[u'EM-5395']	0.607843	O=C1C(NC(CC)=O)C(C)O1
JMMV01	RESPIRATORY	Burkholderia pseudomallei MSHR5855	[u'NONRIBOSOMAL_PEPTIDE']	[u'NRPS']	7	[u'MICACOCIDIN-P6']	0.648655	OC1=C(C2=NC(C3SCC(C(O)C(C)(C)C4=NC(C(O)=O)(C)CS4)N3C)CS2)C(CCCCCl)=CC=C1
JMMV01	RESPIRATORY	Burkholderia pseudomallei MSHR5855	[u'NONRIBOSOMAL_PEPTIDE']	[u'NRPS']	14	[u'FUMIQUINAZOLINE-N']	0.627329	CN1C(=O)C(CC2(O)C3N(C(=O)C4(CC4)N3C(C)=O)C3=CC=CC=C23)N2C(=O)C3=C(C=CC=C3)N=C2C1(C)O
JMMV01	RESPIRATORY	Burkholderia pseudomallei MSHR5855	[u'NONRIBOSOMAL_PEPTIDE']	[u'NRPS']	18	[u'LL-BM-123a', u'BM-123a', u'CINODINE-A"', u'BM-123-A"', u'LL-BM-123-A1', u'LL-BM-123-A"']	0.553922	N=C(N)NCCC[C@@](N)([H])C(N[C@H]([C@H]1O)[C@H](O[C@H](CO)[C@H]1O)O[C@@H]2[C@@H](CO)O[C@@H]([C@@H](O)[C@H]2O)O[C@@H]([C@H](O)[C@H](NC(C(CC3)NC3=N)=O)[C@@H]4O)[C@@H](OC(N)=O)[C@@H]4O)=O
LWQH01	VAGINA	Corynebacterium sp. HMSC069E04	[u'NONRIBOSOMAL_PEPTIDE']	[u'NRPS']	4	[u'Myroridin KB', u'K-582M-B', u'MYRORIDIN-KB', u'K-582M-B', u'K-582-B']	0.762607	N=C(N)NCCCCC(N)C(NC(CC(O)CCNC(N)=N)C(NC(CCCN)C(NC(C(C)O)C(NC(CCCN)C(NC(CC(O)CCNC(N)=N)C(NC(CC1=CC=C(O)C=C1)C(O)=O)=O)=O)=O)=O)=O)=O
LDMQ01	RESPIRATORY	Pseudomonas aeruginosa	[u'NONRIBOSOMAL_PEPTIDE']	[u'NRPS']	4	[u'MICACOCIDIN-P6']	0.765614	OC1=C(C2=NC(C3SCC(C(O)C(C)(C)C4=NC(C(O)=O)(C)CS4)N3C)CS2)C(CCCCCl)=CC=C1
LDMQ01	RESPIRATORY	Pseudomonas aeruginosa	[u'NONRIBOSOMAL_PEPTIDE']	[u'NRPS']	5	[u'CYCLO-[GLY-L-SER-L-PRO-L-DLU]']	0.575472	OCC1NC(=O)CNC(=O)C(CCC(O)=O)NC(=O)C2CCCN2C1=O
LDMQ01	RESPIRATORY	Pseudomonas aeruginosa	[u'NONRIBOSOMAL_PEPTIDE']	[u'NRPS']	6	[u'Belactosin C']	0.752716	O=C1O[C@@H](C(NCCC[C@@H](C(O)=O)NC([C@H](C)N)=O)=O)[C@@H]1[C@@H](C)CC
LDMQ01	RESPIRATORY	Pseudomonas aeruginosa	[u'NONRIBOSOMAL_PEPTIDE']	[u'NRPS']	9	[u'N-1409-A', u'PLUMBEMYCIN-A', u'ALANYLASPARTYL-{2-AMINO-5-PHOSPHORYL-3-PENTENOIC ACID}', u'N-1409-A']	0.999802	O=P(O)(C/C=C\[C@H](C(O)=O)NC([C@H](CC(O)=O)NC([C@H](C)N)=O)=O)O
MAZF01	RESPIRATORY	Pseudomonas aeruginosa	[u'NONRIBOSOMAL_PEPTIDE']	[u'NRPS']	3	[u'CYCLO-[GLY-L-SER-L-PRO-L-DLU]']	0.575472	OCC1NC(=O)CNC(=O)C(CCC(O)=O)NC(=O)C2CCCN2C1=O
MAZF01	RESPIRATORY	Pseudomonas aeruginosa	[u'NONRIBOSOMAL_PEPTIDE']	[u'NRPS']	8	[u'Verticilide A1', u'VERTICILIDE-A1', u'FKI-1033', u'VERTICILIDE', u'VERTICILIDE-A2']	0.999412	CCCCCC1OC(=O)C(C)N(C)C(=O)C(CCCCC)OC(=O)C(C)N(C)C(=O)C(CCCCC)OC(=O)C(C)N(C)C(=O)C(CCCCC)OC(=O)C(C)N(C)C1=O
MAZF01	RESPIRATORY	Pseudomonas aeruginosa	[u'NONRIBOSOMAL_PEPTIDE']	[u'NRPS']	9	[u'N-1409-A', u'PLUMBEMYCIN-A', u'ALANYLASPARTYL-{2-AMINO-5-PHOSPHORYL-3-PENTENOIC ACID}', u'N-1409-A']	0.607451	O=P(O)(C/C=C\[C@H](C(O)=O)NC([C@H](CC(O)=O)NC([C@H](C)N)=O)=O)O
CCPF01	RESPIRATORY	Pseudomonas aeruginosa	[u'NONRIBOSOMAL_PEPTIDE']	[u'NRPS']	7	[u'CYCLO-[GLY-L-SER-L-PRO-L-DLU]']	0.575472	OCC1NC(=O)CNC(=O)C(CCC(O)=O)NC(=O)C2CCCN2C1=O
CCPF01	RESPIRATORY	Pseudomonas aeruginosa	[u'NONRIBOSOMAL_PEPTIDE']	[u'NRPS']	8	[u'MICACOCIDIN-P6']	0.765614	OC1=C(C2=NC(C3SCC(C(O)C(C)(C)C4=NC(C(O)=O)(C)CS4)N3C)CS2)C(CCCCCl)=CC=C1
CCPF01	RESPIRATORY	Pseudomonas aeruginosa	[u'NONRIBOSOMAL_PEPTIDE']	[u'NRPS']	11	[u'SF-2052-A', u'Formimidoylfortimicin A', u'DACTIMICIN', u'SF-2052', u'SF-2098', u'SF-2127', u'Epidactimicin', u'Antibiotic SF 2052']	0.960784	N=CNCC(N(C)[C@H]([C@@H](OC)[C@@H](O)[C@@H]1N)[C@@H](O)[C@@H]1O[C@H]([C@H](N)CC2)O[C@@H]2[C@@](C)([H])N)=O
MAZR01	RESPIRATORY	Pseudomonas aeruginosa	[u'NONRIBOSOMAL_PEPTIDE']	[u'NRPS']	3	[u'CYCLO-[GLY-L-SER-L-PRO-L-DLU]']	0.575472	OCC1NC(=O)CNC(=O)C(CCC(O)=O)NC(=O)C2CCCN2C1=O
MAZR01	RESPIRATORY	Pseudomonas aeruginosa	[u'NONRIBOSOMAL_PEPTIDE']	[u'NRPS']	9	[u'Belactosin C']	0.752716	O=C1O[C@@H](C(NCCC[C@@H](C(O)=O)NC([C@H](C)N)=O)=O)[C@@H]1[C@@H](C)CC
MAZR01	RESPIRATORY	Pseudomonas aeruginosa	[u'NONRIBOSOMAL_PEPTIDE']	[u'NRPS']	10	[u'N-1409-A', u'PLUMBEMYCIN-A', u'ALANYLASPARTYL-{2-AMINO-5-PHOSPHORYL-3-PENTENOIC ACID}', u'N-1409-A']	0.999802	O=P(O)(C/C=C\[C@H](C(O)=O)NC([C@H](CC(O)=O)NC([C@H](C)N)=O)=O)O
LDLA01	RESPIRATORY	Pseudomonas aeruginosa	[u'NONRIBOSOMAL_PEPTIDE']	[u'NRPS']	2	[u'CYCLO-[GLY-L-SER-L-PRO-L-DLU]']	0.575472	OCC1NC(=O)CNC(=O)C(CCC(O)=O)NC(=O)C2CCCN2C1=O
LDLA01	RESPIRATORY	Pseudomonas aeruginosa	[u'NONRIBOSOMAL_PEPTIDE']	[u'NRPS']	4	[u'N-1409-A', u'PLUMBEMYCIN-A', u'ALANYLASPARTYL-{2-AMINO-5-PHOSPHORYL-3-PENTENOIC ACID}', u'N-1409-A']	0.999802	O=P(O)(C/C=C\[C@H](C(O)=O)NC([C@H](CC(O)=O)NC([C@H](C)N)=O)=O)O
LDLA01	RESPIRATORY	Pseudomonas aeruginosa	[u'NONRIBOSOMAL_PEPTIDE']	[u'NRPS']	9	[u'MICACOCIDIN-P6']	0.765614	OC1=C(C2=NC(C3SCC(C(O)C(C)(C)C4=NC(C(O)=O)(C)CS4)N3C)CS2)C(CCCCCl)=CC=C1
ATJY01	RESPIRATORY	Burkholderia pseudomallei MSHR338	[u'NONRIBOSOMAL_PEPTIDE']	[u'NRPS']	9	[u'Antibiotic PB 5266C', u'PB 5266C']	0.752066	[H]\C(C(O)=N)=C(\N=C(O)CN=C(O)C(O)CO)C(O)=NC1CN(C1=O)S(O)(=O)=O
ATJY01	RESPIRATORY	Burkholderia pseudomallei MSHR338	[u'NONRIBOSOMAL_PEPTIDE']	[u'NRPS']	12	[u'FUMIQUINAZOLINE-N']	0.668874	CN1C(=O)C(CC2(O)C3N(C(=O)C4(CC4)N3C(C)=O)C3=CC=CC=C23)N2C(=O)C3=C(C=CC=C3)N=C2C1(C)O
ATJY01	RESPIRATORY	Burkholderia pseudomallei MSHR338	[u'NONRIBOSOMAL_PEPTIDE']	[u'NRPS']	13	[u'SF-2132']	0.694351	CC(C)CC(C(=O)N/C(=C(\C)/COC(=O)N)/C(=O)NC(CO)C(=O)O)NC(=O)C1CCC=NN1C(=O)C(C(C)N)NC(=O)CC(CCN=C(N)N)N
ATJY01	RESPIRATORY	Burkholderia pseudomallei MSHR338	[u'NONRIBOSOMAL_PEPTIDE']	[u'NRPS']	15	[u'FLUVIBACTIN']	0.910714	O=C(N(CCCNC(C1=C(O)C(O)=CC=C1)=O)CCCNC(C2=C(O)C(O)=CC=C2)=O)[C@H]3N=C(O[C@@H]3C)C4=C(O)C(O)=CC=C4
ATJY01	RESPIRATORY	Burkholderia pseudomallei MSHR338	[u'NONRIBOSOMAL_PEPTIDE']	[u'NRPS']	18	[u'MICACOCIDIN-P6']	0.73457	OC1=C(C2=NC(C3SCC(C(O)C(C)(C)C4=NC(C(O)=O)(C)CS4)N3C)CS2)C(CCCCCl)=CC=C1
ATJY01	RESPIRATORY	Burkholderia pseudomallei MSHR338	[u'NONRIBOSOMAL_PEPTIDE']	[u'NRPS']	19	[u'EM-5395']	0.607843	O=C1C(NC(CC)=O)C(C)O1
ATJY01	RESPIRATORY	Burkholderia pseudomallei MSHR338	[u'NONRIBOSOMAL_PEPTIDE']	[u'NRPS']	20	[u'FLUVIBACTIN']	1	O=C(N(CCCNC(C1=C(O)C(O)=CC=C1)=O)CCCNC(C2=C(O)C(O)=CC=C2)=O)[C@H]3N=C(O[C@@H]3C)C4=C(O)C(O)=CC=C4
ATJY01	RESPIRATORY	Burkholderia pseudomallei MSHR338	[u'NONRIBOSOMAL_PEPTIDE']	[u'NRPS']	21	[u'LL-BM-123a', u'BM-123a', u'CINODINE-A"', u'BM-123-A"', u'LL-BM-123-A1', u'LL-BM-123-A"']	0.553922	N=C(N)NCCC[C@@](N)([H])C(N[C@H]([C@H]1O)[C@H](O[C@H](CO)[C@H]1O)O[C@@H]2[C@@H](CO)O[C@@H]([C@@H](O)[C@H]2O)O[C@@H]([C@H](O)[C@H](NC(C(CC3)NC3=N)=O)[C@@H]4O)[C@@H](OC(N)=O)[C@@H]4O)=O
ATJY01	RESPIRATORY	Burkholderia pseudomallei MSHR338	[u'NONRIBOSOMAL_PEPTIDE']	[u'NRPS']	22	[u'FLUVIBACTIN']	1	O=C(N(CCCNC(C1=C(O)C(O)=CC=C1)=O)CCCNC(C2=C(O)C(O)=CC=C2)=O)[C@H]3N=C(O[C@@H]3C)C4=C(O)C(O)=CC=C4
LEJH01	RESPIRATORY	Pseudomonas aeruginosa	[u'NONRIBOSOMAL_PEPTIDE']	[u'NRPS']	2	[u'CYCLO-[GLY-L-SER-L-PRO-L-DLU]']	0.575472	OCC1NC(=O)CNC(=O)C(CCC(O)=O)NC(=O)C2CCCN2C1=O
LEJH01	RESPIRATORY	Pseudomonas aeruginosa	[u'NONRIBOSOMAL_PEPTIDE']	[u'NRPS']	4	[u'N-1409-A', u'PLUMBEMYCIN-A', u'ALANYLASPARTYL-{2-AMINO-5-PHOSPHORYL-3-PENTENOIC ACID}', u'N-1409-A']	0.999802	O=P(O)(C/C=C\[C@H](C(O)=O)NC([C@H](CC(O)=O)NC([C@H](C)N)=O)=O)O
LEJH01	RESPIRATORY	Pseudomonas aeruginosa	[u'NONRIBOSOMAL_PEPTIDE']	[u'NRPS']	6	[u'Belactosin C']	0.752716	O=C1O[C@@H](C(NCCC[C@@H](C(O)=O)NC([C@H](C)N)=O)=O)[C@@H]1[C@@H](C)CC
LEJH01	RESPIRATORY	Pseudomonas aeruginosa	[u'NONRIBOSOMAL_PEPTIDE']	[u'NRPS']	8	[u'MICACOCIDIN-P6']	0.765614	OC1=C(C2=NC(C3SCC(C(O)C(C)(C)C4=NC(C(O)=O)(C)CS4)N3C)CS2)C(CCCCCl)=CC=C1
MAKM01	RESPIRATORY	Pseudomonas aeruginosa	[u'NONRIBOSOMAL_PEPTIDE']	[u'NRPS']	3	[u'CYCLO-[GLY-L-SER-L-PRO-L-DLU]']	0.575472	OCC1NC(=O)CNC(=O)C(CCC(O)=O)NC(=O)C2CCCN2C1=O
MAKM01	RESPIRATORY	Pseudomonas aeruginosa	[u'NONRIBOSOMAL_PEPTIDE']	[u'NRPS']	8	[u'N-1409-A', u'PLUMBEMYCIN-A', u'ALANYLASPARTYL-{2-AMINO-5-PHOSPHORYL-3-PENTENOIC ACID}', u'N-1409-A']	0.999802	O=P(O)(C/C=C\[C@H](C(O)=O)NC([C@H](CC(O)=O)NC([C@H](C)N)=O)=O)O
LWQG01	VAGINA	Staphylococcus sp. HMSC068D05	[u'NONRIBOSOMAL_PEPTIDE']	[u'NRPS']	1	[u'BACILLISTATIN 2']	0.628906	CCC(C)C1OC(=O)C(N=C(O)C(C)OC(=O)C(N=C(O)C(OC(=O)C(N=C(O)C(C)OC(=O)C(N=C(O)C(CC(C)C)OC(=O)C(N=C(O)C(C)OC(=O)C(N=C1O)C(C)C)C(C)C)C(C)C)C(C)C)C(C)CC)C(C)C)C(C)C
LWQG01	VAGINA	Staphylococcus sp. HMSC068D05	[u'NONRIBOSOMAL_PEPTIDE']	[u'NRPS']	4	[u'Discarine-B']	0.639459	O=C(C(NC(C(C(C)CC)N(C)C)=O)C(C(C)C)O1)NC(CC2=CNC3=C2C=CC=C3)C(N/C=C\C4=CC=C1C=C4)=O
LEHK01	RESPIRATORY	Pseudomonas aeruginosa	[u'NONRIBOSOMAL_PEPTIDE']	[u'NRPS']	5	[u'MICACOCIDIN-P6']	0.765614	OC1=C(C2=NC(C3SCC(C(O)C(C)(C)C4=NC(C(O)=O)(C)CS4)N3C)CS2)C(CCCCCl)=CC=C1
LEHK01	RESPIRATORY	Pseudomonas aeruginosa	[u'NONRIBOSOMAL_PEPTIDE']	[u'NRPS']	8	[u'N-1409-A', u'PLUMBEMYCIN-A', u'ALANYLASPARTYL-{2-AMINO-5-PHOSPHORYL-3-PENTENOIC ACID}', u'N-1409-A']	0.999802	O=P(O)(C/C=C\[C@H](C(O)=O)NC([C@H](CC(O)=O)NC([C@H](C)N)=O)=O)O
MAZT01	RESPIRATORY	Pseudomonas aeruginosa	[u'NONRIBOSOMAL_PEPTIDE']	[u'NRPS']	3	[u'CYCLO-[GLY-L-SER-L-PRO-L-DLU]']	0.575472	OCC1NC(=O)CNC(=O)C(CCC(O)=O)NC(=O)C2CCCN2C1=O
MAZT01	RESPIRATORY	Pseudomonas aeruginosa	[u'NONRIBOSOMAL_PEPTIDE']	[u'NRPS']	8	[u'N-1409-A', u'PLUMBEMYCIN-A', u'ALANYLASPARTYL-{2-AMINO-5-PHOSPHORYL-3-PENTENOIC ACID}', u'N-1409-A']	0.999802	O=P(O)(C/C=C\[C@H](C(O)=O)NC([C@H](CC(O)=O)NC([C@H](C)N)=O)=O)O
LEGC01	RESPIRATORY	Pseudomonas aeruginosa	[u'NONRIBOSOMAL_PEPTIDE']	[u'NRPS']	2	[u'N-1409-A', u'PLUMBEMYCIN-A', u'ALANYLASPARTYL-{2-AMINO-5-PHOSPHORYL-3-PENTENOIC ACID}', u'N-1409-A']	0.999802	O=P(O)(C/C=C\[C@H](C(O)=O)NC([C@H](CC(O)=O)NC([C@H](C)N)=O)=O)O
LEGC01	RESPIRATORY	Pseudomonas aeruginosa	[u'NONRIBOSOMAL_PEPTIDE']	[u'NRPS']	3	[u'Belactosin C']	0.752716	O=C1O[C@@H](C(NCCC[C@@H](C(O)=O)NC([C@H](C)N)=O)=O)[C@@H]1[C@@H](C)CC
LEGC01	RESPIRATORY	Pseudomonas aeruginosa	[u'NONRIBOSOMAL_PEPTIDE']	[u'NRPS']	4	[u'FLUVIBACTIN']	1	O=C(N(CCCNC(C1=C(O)C(O)=CC=C1)=O)CCCNC(C2=C(O)C(O)=CC=C2)=O)[C@H]3N=C(O[C@@H]3C)C4=C(O)C(O)=CC=C4
LEGC01	RESPIRATORY	Pseudomonas aeruginosa	[u'NONRIBOSOMAL_PEPTIDE']	[u'NRPS']	5	[u'MICACOCIDIN-P6']	0.765614	OC1=C(C2=NC(C3SCC(C(O)C(C)(C)C4=NC(C(O)=O)(C)CS4)N3C)CS2)C(CCCCCl)=CC=C1
MAZG01	RESPIRATORY	Pseudomonas aeruginosa	[u'NONRIBOSOMAL_PEPTIDE']	[u'NRPS']	3	[u'CYCLO-[GLY-L-SER-L-PRO-L-DLU]']	0.575472	OCC1NC(=O)CNC(=O)C(CCC(O)=O)NC(=O)C2CCCN2C1=O
MAZG01	RESPIRATORY	Pseudomonas aeruginosa	[u'NONRIBOSOMAL_PEPTIDE']	[u'NRPS']	8	[u'N-1409-A', u'PLUMBEMYCIN-A', u'ALANYLASPARTYL-{2-AMINO-5-PHOSPHORYL-3-PENTENOIC ACID}', u'N-1409-A']	0.999802	O=P(O)(C/C=C\[C@H](C(O)=O)NC([C@H](CC(O)=O)NC([C@H](C)N)=O)=O)O
AHJB01	RESPIRATORY	Burkholderia pseudomallei 1258a	[u'NONRIBOSOMAL_PEPTIDE']	[u'NRPS']	10	[u'MICACOCIDIN-P6']	0.73457	OC1=C(C2=NC(C3SCC(C(O)C(C)(C)C4=NC(C(O)=O)(C)CS4)N3C)CS2)C(CCCCCl)=CC=C1
AHJB01	RESPIRATORY	Burkholderia pseudomallei 1258a	[u'NONRIBOSOMAL_PEPTIDE']	[u'NRPS']	11	[u'PSEUDOTRIENIC ACID B', u'Pseudotrienoic acid B']	0.615357	[H]\C(CCN=C(O)C(C)C(O)CN=C(O)C\C([H])=C(/C)\C(\[H])=C(/[H])C(O)CCCCCCC)=C(\[H])/C(/[H])=C(\[H])/C(/[H])=C(\[H])C(O)=O
AHJB01	RESPIRATORY	Burkholderia pseudomallei 1258a	[u'NONRIBOSOMAL_PEPTIDE']	[u'NRPS']	13	[u'VALCLAVAM', u'TU-1718-Z']	0.999802	O=C(C1)N2[C@@]1([H])O[C@@H](CC(O)C(C(O)=O)NC([C@H](C(C)C)N)=O)C2
AHJB01	RESPIRATORY	Burkholderia pseudomallei 1258a	[u'NONRIBOSOMAL_PEPTIDE']	[u'NRPS']	15	[u'DAPDIAMIDE C']	0.607451	[H]\C(=C(\[H])C(O)=NCC(N)C(O)=NC(CC(C)C)C(O)=O)C(O)=N
AHJB01	RESPIRATORY	Burkholderia pseudomallei 1258a	[u'NONRIBOSOMAL_PEPTIDE']	[u'NRPS']	16	[u'FLUVIBACTIN']	1	O=C(N(CCCNC(C1=C(O)C(O)=CC=C1)=O)CCCNC(C2=C(O)C(O)=CC=C2)=O)[C@H]3N=C(O[C@@H]3C)C4=C(O)C(O)=CC=C4
LDLL01	RESPIRATORY	Pseudomonas aeruginosa	[u'NONRIBOSOMAL_PEPTIDE']	[u'NRPS']	3	[u'MICACOCIDIN-P6']	0.765614	OC1=C(C2=NC(C3SCC(C(O)C(C)(C)C4=NC(C(O)=O)(C)CS4)N3C)CS2)C(CCCCCl)=CC=C1
LDLL01	RESPIRATORY	Pseudomonas aeruginosa	[u'NONRIBOSOMAL_PEPTIDE']	[u'NRPS']	4	[u'N-1409-A', u'PLUMBEMYCIN-A', u'ALANYLASPARTYL-{2-AMINO-5-PHOSPHORYL-3-PENTENOIC ACID}', u'N-1409-A']	0.999802	O=P(O)(C/C=C\[C@H](C(O)=O)NC([C@H](CC(O)=O)NC([C@H](C)N)=O)=O)O
LEJU01	RESPIRATORY	Pseudomonas aeruginosa	[u'NONRIBOSOMAL_PEPTIDE']	[u'NRPS']	3	[u'MICACOCIDIN-P6']	0.765614	OC1=C(C2=NC(C3SCC(C(O)C(C)(C)C4=NC(C(O)=O)(C)CS4)N3C)CS2)C(CCCCCl)=CC=C1
LEJU01	RESPIRATORY	Pseudomonas aeruginosa	[u'NONRIBOSOMAL_PEPTIDE']	[u'NRPS']	5	[u'Belactosin C']	0.752716	O=C1O[C@@H](C(NCCC[C@@H](C(O)=O)NC([C@H](C)N)=O)=O)[C@@H]1[C@@H](C)CC
LEJU01	RESPIRATORY	Pseudomonas aeruginosa	[u'NONRIBOSOMAL_PEPTIDE']	[u'NRPS']	9	[u'N-1409-A', u'PLUMBEMYCIN-A', u'ALANYLASPARTYL-{2-AMINO-5-PHOSPHORYL-3-PENTENOIC ACID}', u'N-1409-A']	0.999802	O=P(O)(C/C=C\[C@H](C(O)=O)NC([C@H](CC(O)=O)NC([C@H](C)N)=O)=O)O
LDLP01	RESPIRATORY	Pseudomonas aeruginosa	[u'NONRIBOSOMAL_PEPTIDE']	[u'NRPS']	3	[u'Belactosin C']	0.752716	O=C1O[C@@H](C(NCCC[C@@H](C(O)=O)NC([C@H](C)N)=O)=O)[C@@H]1[C@@H](C)CC
LDLP01	RESPIRATORY	Pseudomonas aeruginosa	[u'NONRIBOSOMAL_PEPTIDE']	[u'NRPS']	4	[u'MICACOCIDIN-P6']	0.765614	OC1=C(C2=NC(C3SCC(C(O)C(C)(C)C4=NC(C(O)=O)(C)CS4)N3C)CS2)C(CCCCCl)=CC=C1
LDLP01	RESPIRATORY	Pseudomonas aeruginosa	[u'NONRIBOSOMAL_PEPTIDE']	[u'NRPS']	7	[u'N-1409-A', u'PLUMBEMYCIN-A', u'ALANYLASPARTYL-{2-AMINO-5-PHOSPHORYL-3-PENTENOIC ACID}', u'N-1409-A']	0.999802	O=P(O)(C/C=C\[C@H](C(O)=O)NC([C@H](CC(O)=O)NC([C@H](C)N)=O)=O)O
LEHV01	RESPIRATORY	Pseudomonas aeruginosa	[u'NONRIBOSOMAL_PEPTIDE']	[u'NRPS']	7	[u'CYCLO-[GLY-L-SER-L-PRO-L-DLU]']	0.575472	OCC1NC(=O)CNC(=O)C(CCC(O)=O)NC(=O)C2CCCN2C1=O
LEHV01	RESPIRATORY	Pseudomonas aeruginosa	[u'NONRIBOSOMAL_PEPTIDE']	[u'NRPS']	8	[u'MICACOCIDIN-P6']	0.765614	OC1=C(C2=NC(C3SCC(C(O)C(C)(C)C4=NC(C(O)=O)(C)CS4)N3C)CS2)C(CCCCCl)=CC=C1
LEHV01	RESPIRATORY	Pseudomonas aeruginosa	[u'NONRIBOSOMAL_PEPTIDE']	[u'NRPS']	9	[u'Glidobactin G', u' Bu-2867T-G']	0.668742	O=C(N[C@@H]1C(NC(CO)/C=C/C(NCC[C@@H](O)C1)=O)=O)C(C(C)O)NC(/C=C/C=C/CCCCCCC)=O
LSAB01	RESPIRATORY	Pseudomonas aeruginosa	[u'NONRIBOSOMAL_PEPTIDE']	[u'NRPS']	3	[u'CYCLO-[GLY-L-SER-L-PRO-L-DLU]']	0.575472	OCC1NC(=O)CNC(=O)C(CCC(O)=O)NC(=O)C2CCCN2C1=O
LSAB01	RESPIRATORY	Pseudomonas aeruginosa	[u'NONRIBOSOMAL_PEPTIDE']	[u'NRPS']	6	[u'MICACOCIDIN-P6']	0.765614	OC1=C(C2=NC(C3SCC(C(O)C(C)(C)C4=NC(C(O)=O)(C)CS4)N3C)CS2)C(CCCCCl)=CC=C1
JIEE01	RESPIRATORY	Pseudomonas aeruginosa BWH029	[u'NONRIBOSOMAL_PEPTIDE']	[u'NRPS']	5	[u'CYCLO-[GLY-L-SER-L-PRO-L-DLU]']	0.575472	OCC1NC(=O)CNC(=O)C(CCC(O)=O)NC(=O)C2CCCN2C1=O
JIEE01	RESPIRATORY	Pseudomonas aeruginosa BWH029	[u'NONRIBOSOMAL_PEPTIDE']	[u'NRPS']	7	[u'Belactosin C']	0.752716	O=C1O[C@@H](C(NCCC[C@@H](C(O)=O)NC([C@H](C)N)=O)=O)[C@@H]1[C@@H](C)CC
JIEE01	RESPIRATORY	Pseudomonas aeruginosa BWH029	[u'NONRIBOSOMAL_PEPTIDE']	[u'NRPS']	10	[u'MICACOCIDIN-P6']	0.765614	OC1=C(C2=NC(C3SCC(C(O)C(C)(C)C4=NC(C(O)=O)(C)CS4)N3C)CS2)C(CCCCCl)=CC=C1
JIEE01	RESPIRATORY	Pseudomonas aeruginosa BWH029	[u'NONRIBOSOMAL_PEPTIDE']	[u'NRPS']	11	[u'FLUVIBACTIN']	1	O=C(N(CCCNC(C1=C(O)C(O)=CC=C1)=O)CCCNC(C2=C(O)C(O)=CC=C2)=O)[C@H]3N=C(O[C@@H]3C)C4=C(O)C(O)=CC=C4
JIEE01	RESPIRATORY	Pseudomonas aeruginosa BWH029	[u'NONRIBOSOMAL_PEPTIDE']	[u'NRPS']	12	[u'B-3454']	0.751553	O=C(NC(CO)C(NC(CCCNC(C)=O)C(NCCCCN)=O)=O)C(C(O)C(O)=O)NC(C(CCCNC(C)=O)N)=O
LOQZ01	EYE	Pseudomonas aeruginosa	[u'NONRIBOSOMAL_PEPTIDE']	[u'NRPS']	4	[u'MICACOCIDIN-P6']	0.765614	OC1=C(C2=NC(C3SCC(C(O)C(C)(C)C4=NC(C(O)=O)(C)CS4)N3C)CS2)C(CCCCCl)=CC=C1
LOQZ01	EYE	Pseudomonas aeruginosa	[u'NONRIBOSOMAL_PEPTIDE']	[u'NRPS']	5	[u'N-1409-A', u'PLUMBEMYCIN-A', u'ALANYLASPARTYL-{2-AMINO-5-PHOSPHORYL-3-PENTENOIC ACID}', u'N-1409-A']	0.999802	O=P(O)(C/C=C\[C@H](C(O)=O)NC([C@H](CC(O)=O)NC([C@H](C)N)=O)=O)O
CCOS01	RESPIRATORY	Pseudomonas aeruginosa	[u'NONRIBOSOMAL_PEPTIDE']	[u'NRPS']	4	[u'CYCLO-[GLY-L-SER-L-PRO-L-DLU]']	0.575472	OCC1NC(=O)CNC(=O)C(CCC(O)=O)NC(=O)C2CCCN2C1=O
CCOS01	RESPIRATORY	Pseudomonas aeruginosa	[u'NONRIBOSOMAL_PEPTIDE']	[u'NRPS']	7	[u'SF-2052-A', u'Formimidoylfortimicin A', u'DACTIMICIN', u'SF-2052', u'SF-2098', u'SF-2127', u'Epidactimicin', u'Antibiotic SF 2052']	0.960784	N=CNCC(N(C)[C@H]([C@@H](OC)[C@@H](O)[C@@H]1N)[C@@H](O)[C@@H]1O[C@H]([C@H](N)CC2)O[C@@H]2[C@@](C)([H])N)=O
CCOS01	RESPIRATORY	Pseudomonas aeruginosa	[u'NONRIBOSOMAL_PEPTIDE']	[u'NRPS']	9	[u'MICACOCIDIN-P6']	0.765614	OC1=C(C2=NC(C3SCC(C(O)C(C)(C)C4=NC(C(O)=O)(C)CS4)N3C)CS2)C(CCCCCl)=CC=C1
CCOS01	RESPIRATORY	Pseudomonas aeruginosa	[u'NONRIBOSOMAL_PEPTIDE']	[u'NRPS']	10	[u'N-1409-A', u'PLUMBEMYCIN-A', u'ALANYLASPARTYL-{2-AMINO-5-PHOSPHORYL-3-PENTENOIC ACID}', u'N-1409-A']	0.999802	O=P(O)(C/C=C\[C@H](C(O)=O)NC([C@H](CC(O)=O)NC([C@H](C)N)=O)=O)O
CCOS01	RESPIRATORY	Pseudomonas aeruginosa	[u'NONRIBOSOMAL_PEPTIDE']	[u'NRPS']	12	[u'N METHYL L ISOLEUCYL L AMICLEONOMYCINYL L GLUTAMINE', u'L MEILE L ACM L GLN']	0.607451	O=C([C@H]([C@@H](C)CC)NC)N[C@@H](CCC1C=CC(N)C=C1)C(NC(CCC(N)=O)C(O)=O)=O
LEFE01	RESPIRATORY	Pseudomonas aeruginosa	[u'NONRIBOSOMAL_PEPTIDE']	[u'NRPS']	2	[u'CYCLO-[GLY-L-SER-L-PRO-L-DLU]']	0.575472	OCC1NC(=O)CNC(=O)C(CCC(O)=O)NC(=O)C2CCCN2C1=O
LEFE01	RESPIRATORY	Pseudomonas aeruginosa	[u'NONRIBOSOMAL_PEPTIDE']	[u'NRPS']	5	[u'B-3454']	0.751553	O=C(NC(CO)C(NC(CCCNC(C)=O)C(NCCCCN)=O)=O)C(C(O)C(O)=O)NC(C(CCCNC(C)=O)N)=O
LEFE01	RESPIRATORY	Pseudomonas aeruginosa	[u'NONRIBOSOMAL_PEPTIDE']	[u'NRPS']	6	[u'Verticilide A1', u'VERTICILIDE-A1', u'FKI-1033', u'VERTICILIDE', u'VERTICILIDE-A2']	0.941731	CCCCCC1OC(=O)C(C)N(C)C(=O)C(CCCCC)OC(=O)C(C)N(C)C(=O)C(CCCCC)OC(=O)C(C)N(C)C(=O)C(CCCCC)OC(=O)C(C)N(C)C1=O
LEFE01	RESPIRATORY	Pseudomonas aeruginosa	[u'NONRIBOSOMAL_PEPTIDE']	[u'NRPS']	10	[u'Belactosin C']	0.752716	O=C1O[C@@H](C(NCCC[C@@H](C(O)=O)NC([C@H](C)N)=O)=O)[C@@H]1[C@@H](C)CC
AGQU01	RESPIRATORY	Mycobacterium abscessus 47J26	[u'NONRIBOSOMAL_PEPTIDE']	[u'NRPS']	15	[u'EM-5395']	0.607843	O=C1C(NC(CC)=O)C(C)O1
LEGZ01	RESPIRATORY	Pseudomonas aeruginosa	[u'NONRIBOSOMAL_PEPTIDE']	[u'NRPS']	8	[u'Belactosin C']	0.752716	O=C1O[C@@H](C(NCCC[C@@H](C(O)=O)NC([C@H](C)N)=O)=O)[C@@H]1[C@@H](C)CC
LEGZ01	RESPIRATORY	Pseudomonas aeruginosa	[u'NONRIBOSOMAL_PEPTIDE']	[u'NRPS']	9	[u'CYCLO-[GLY-L-SER-L-PRO-L-DLU]']	0.575472	OCC1NC(=O)CNC(=O)C(CCC(O)=O)NC(=O)C2CCCN2C1=O
AHSX01	ORAL	Streptococcus mutans 1ID3	[u'NONRIBOSOMAL_PEPTIDE']	[u'NRPS']	5	[u'Discarine-B']	0.671803	O=C(C(NC(C(C(C)CC)N(C)C)=O)C(C(C)C)O1)NC(CC2=CNC3=C2C=CC=C3)C(N/C=C\C4=CC=C1C=C4)=O
LTPV01	VAGINA	Staphylococcus sp. HMSC063E12	[u'NONRIBOSOMAL_PEPTIDE']	[u'NRPS']	1	[u'BACILLISTATIN 2']	0.641434	CCC(C)C1OC(=O)C(N=C(O)C(C)OC(=O)C(N=C(O)C(OC(=O)C(N=C(O)C(C)OC(=O)C(N=C(O)C(CC(C)C)OC(=O)C(N=C(O)C(C)OC(=O)C(N=C1O)C(C)C)C(C)C)C(C)C)C(C)C)C(C)CC)C(C)C)C(C)C
LTPV01	VAGINA	Staphylococcus sp. HMSC063E12	[u'NONRIBOSOMAL_PEPTIDE']	[u'NRPS']	5	[u'Discarine-B']	0.639459	O=C(C(NC(C(C(C)CC)N(C)C)=O)C(C(C)C)O1)NC(CC2=CNC3=C2C=CC=C3)C(N/C=C\C4=CC=C1C=C4)=O
CCOG01	RESPIRATORY	Pseudomonas aeruginosa	[u'NONRIBOSOMAL_PEPTIDE']	[u'NRPS']	5	[u'CYCLO-[GLY-L-SER-L-PRO-L-DLU]']	0.575472	OCC1NC(=O)CNC(=O)C(CCC(O)=O)NC(=O)C2CCCN2C1=O
CCOG01	RESPIRATORY	Pseudomonas aeruginosa	[u'NONRIBOSOMAL_PEPTIDE']	[u'NRPS']	6	[u'MICACOCIDIN-P6']	0.765614	OC1=C(C2=NC(C3SCC(C(O)C(C)(C)C4=NC(C(O)=O)(C)CS4)N3C)CS2)C(CCCCCl)=CC=C1
CCOG01	RESPIRATORY	Pseudomonas aeruginosa	[u'NONRIBOSOMAL_PEPTIDE']	[u'NRPS']	9	[u'N-1409-A', u'PLUMBEMYCIN-A', u'ALANYLASPARTYL-{2-AMINO-5-PHOSPHORYL-3-PENTENOIC ACID}', u'N-1409-A']	0.999802	O=P(O)(C/C=C\[C@H](C(O)=O)NC([C@H](CC(O)=O)NC([C@H](C)N)=O)=O)O
CCOG01	RESPIRATORY	Pseudomonas aeruginosa	[u'NONRIBOSOMAL_PEPTIDE']	[u'NRPS']	10	[u'SF-2052-A', u'Formimidoylfortimicin A', u'DACTIMICIN', u'SF-2052', u'SF-2098', u'SF-2127', u'Epidactimicin', u'Antibiotic SF 2052']	0.960784	N=CNCC(N(C)[C@H]([C@@H](OC)[C@@H](O)[C@@H]1N)[C@@H](O)[C@@H]1O[C@H]([C@H](N)CC2)O[C@@H]2[C@@](C)([H])N)=O
CCOG01	RESPIRATORY	Pseudomonas aeruginosa	[u'NONRIBOSOMAL_PEPTIDE']	[u'NRPS']	11	[u'N METHYL L ISOLEUCYL L AMICLEONOMYCINYL L GLUTAMINE', u'L MEILE L ACM L GLN']	0.607451	O=C([C@H]([C@@H](C)CC)NC)N[C@@H](CCC1C=CC(N)C=C1)C(NC(CCC(N)=O)C(O)=O)=O
MAZL01	RESPIRATORY	Pseudomonas aeruginosa	[u'NONRIBOSOMAL_PEPTIDE']	[u'NRPS']	3	[u'CYCLO-[GLY-L-SER-L-PRO-L-DLU]']	0.575472	OCC1NC(=O)CNC(=O)C(CCC(O)=O)NC(=O)C2CCCN2C1=O
MAZL01	RESPIRATORY	Pseudomonas aeruginosa	[u'NONRIBOSOMAL_PEPTIDE']	[u'NRPS']	8	[u'Verticilide A1', u'VERTICILIDE-A1', u'FKI-1033', u'VERTICILIDE', u'VERTICILIDE-A2']	0.999412	CCCCCC1OC(=O)C(C)N(C)C(=O)C(CCCCC)OC(=O)C(C)N(C)C(=O)C(CCCCC)OC(=O)C(C)N(C)C(=O)C(CCCCC)OC(=O)C(C)N(C)C1=O
MAZH01	RESPIRATORY	Pseudomonas aeruginosa	[u'NONRIBOSOMAL_PEPTIDE']	[u'NRPS']	3	[u'CYCLO-[GLY-L-SER-L-PRO-L-DLU]']	0.575472	OCC1NC(=O)CNC(=O)C(CCC(O)=O)NC(=O)C2CCCN2C1=O
MAZH01	RESPIRATORY	Pseudomonas aeruginosa	[u'NONRIBOSOMAL_PEPTIDE']	[u'NRPS']	10	[u'N-1409-A', u'PLUMBEMYCIN-A', u'ALANYLASPARTYL-{2-AMINO-5-PHOSPHORYL-3-PENTENOIC ACID}', u'N-1409-A']	0.999802	O=P(O)(C/C=C\[C@H](C(O)=O)NC([C@H](CC(O)=O)NC([C@H](C)N)=O)=O)O
LTQK01	VAGINA	Staphylococcus sp. HMSC061C10	[u'NONRIBOSOMAL_PEPTIDE']	[u'NRPS']	4	[u'BACILLISTATIN 2']	0.628906	CCC(C)C1OC(=O)C(N=C(O)C(C)OC(=O)C(N=C(O)C(OC(=O)C(N=C(O)C(C)OC(=O)C(N=C(O)C(CC(C)C)OC(=O)C(N=C(O)C(C)OC(=O)C(N=C1O)C(C)C)C(C)C)C(C)C)C(C)C)C(C)CC)C(C)C)C(C)C
LDMK01	RESPIRATORY	Pseudomonas aeruginosa	[u'NONRIBOSOMAL_PEPTIDE']	[u'NRPS']	3	[u'CYCLO-[GLY-L-SER-L-PRO-L-DLU]']	0.575472	OCC1NC(=O)CNC(=O)C(CCC(O)=O)NC(=O)C2CCCN2C1=O
LDMK01	RESPIRATORY	Pseudomonas aeruginosa	[u'NONRIBOSOMAL_PEPTIDE']	[u'NRPS']	5	[u'N-1409-A', u'PLUMBEMYCIN-A', u'ALANYLASPARTYL-{2-AMINO-5-PHOSPHORYL-3-PENTENOIC ACID}', u'N-1409-A']	0.999802	O=P(O)(C/C=C\[C@H](C(O)=O)NC([C@H](CC(O)=O)NC([C@H](C)N)=O)=O)O
LDMK01	RESPIRATORY	Pseudomonas aeruginosa	[u'NONRIBOSOMAL_PEPTIDE']	[u'NRPS']	7	[u'MICACOCIDIN-P6']	0.765614	OC1=C(C2=NC(C3SCC(C(O)C(C)(C)C4=NC(C(O)=O)(C)CS4)N3C)CS2)C(CCCCCl)=CC=C1
LDMK01	RESPIRATORY	Pseudomonas aeruginosa	[u'NONRIBOSOMAL_PEPTIDE']	[u'NRPS']	8	[u'FLUVIBACTIN']	1	O=C(N(CCCNC(C1=C(O)C(O)=CC=C1)=O)CCCNC(C2=C(O)C(O)=CC=C2)=O)[C@H]3N=C(O[C@@H]3C)C4=C(O)C(O)=CC=C4
LEIA01	RESPIRATORY	Pseudomonas aeruginosa	[u'NONRIBOSOMAL_PEPTIDE']	[u'NRPS']	4	[u'N-1409-A', u'PLUMBEMYCIN-A', u'ALANYLASPARTYL-{2-AMINO-5-PHOSPHORYL-3-PENTENOIC ACID}', u'N-1409-A']	0.999802	O=P(O)(C/C=C\[C@H](C(O)=O)NC([C@H](CC(O)=O)NC([C@H](C)N)=O)=O)O
LEIA01	RESPIRATORY	Pseudomonas aeruginosa	[u'NONRIBOSOMAL_PEPTIDE']	[u'NRPS']	5	[u'Belactosin C']	0.752716	O=C1O[C@@H](C(NCCC[C@@H](C(O)=O)NC([C@H](C)N)=O)=O)[C@@H]1[C@@H](C)CC
LEIA01	RESPIRATORY	Pseudomonas aeruginosa	[u'NONRIBOSOMAL_PEPTIDE']	[u'NRPS']	8	[u'MICACOCIDIN-P6']	0.765614	OC1=C(C2=NC(C3SCC(C(O)C(C)(C)C4=NC(C(O)=O)(C)CS4)N3C)CS2)C(CCCCCl)=CC=C1
JRMD01	RESPIRATORY	Mycobacterium abscessus	[u'NONRIBOSOMAL_PEPTIDE']	[u'NRPS']	15	[u'TL-119', u'A-3309-B', u'HEPTAMYCIN-B', u'A-3302-B']	0.572954	O=C(NC(C(C)C)C(NC(C)C(N/C(C(OC1C)=O)=C/C)=O)=O)C1NC(C(CC2=CC=CC=C2)NC(C(CC(C)C)NC(C(CC3=CC=CC=C3)NC(C)=O)=O)=O)=O
JRMD01	RESPIRATORY	Mycobacterium abscessus	[u'NONRIBOSOMAL_PEPTIDE']	[u'NRPS']	16	[u'ANTIMYCIN-A9']	0.642321	CCCCC1C(OC(=O)CC2=CC=CC=C2)C(C)OC(=O)C(NC(=O)C2=C(O)C(NC=O)=CC=C2)C(C)OC1=O
AHRD01	ORAL	Streptococcus mutans SA38	[u'NONRIBOSOMAL_PEPTIDE']	[u'NRPS']	7	[u'Belactosin B']	0.607255	O=C([C@H](O)[C@H]([C@@H](C)CC)C(OC)=O)N[C@@H](C1)[C@H]1C[C@@H](C(O)=O)NC([C@H](C)N)=O
AHSF01	ORAL	Streptococcus mutans N34	[u'NONRIBOSOMAL_PEPTIDE']	[u'NRPS']	8	[u'Discarine-B']	0.671803	O=C(C(NC(C(C(C)CC)N(C)C)=O)C(C(C)C)O1)NC(CC2=CNC3=C2C=CC=C3)C(N/C=C\C4=CC=C1C=C4)=O
LEFJ01	RESPIRATORY	Pseudomonas aeruginosa	[u'NONRIBOSOMAL_PEPTIDE']	[u'NRPS']	6	[u'CYCLO-[GLY-L-SER-L-PRO-L-DLU]']	0.575472	OCC1NC(=O)CNC(=O)C(CCC(O)=O)NC(=O)C2CCCN2C1=O
CCOB01	RESPIRATORY	Pseudomonas aeruginosa	[u'NONRIBOSOMAL_PEPTIDE']	[u'NRPS']	5	[u'CYCLO-[GLY-L-SER-L-PRO-L-DLU]']	0.575472	OCC1NC(=O)CNC(=O)C(CCC(O)=O)NC(=O)C2CCCN2C1=O
CCOB01	RESPIRATORY	Pseudomonas aeruginosa	[u'NONRIBOSOMAL_PEPTIDE']	[u'NRPS']	6	[u'SF-2052-A', u'Formimidoylfortimicin A', u'DACTIMICIN', u'SF-2052', u'SF-2098', u'SF-2127', u'Epidactimicin', u'Antibiotic SF 2052']	0.960784	N=CNCC(N(C)[C@H]([C@@H](OC)[C@@H](O)[C@@H]1N)[C@@H](O)[C@@H]1O[C@H]([C@H](N)CC2)O[C@@H]2[C@@](C)([H])N)=O
CCOB01	RESPIRATORY	Pseudomonas aeruginosa	[u'NONRIBOSOMAL_PEPTIDE']	[u'NRPS']	7	[u'N-1409-A', u'PLUMBEMYCIN-A', u'ALANYLASPARTYL-{2-AMINO-5-PHOSPHORYL-3-PENTENOIC ACID}', u'N-1409-A']	0.999802	O=P(O)(C/C=C\[C@H](C(O)=O)NC([C@H](CC(O)=O)NC([C@H](C)N)=O)=O)O
CCOB01	RESPIRATORY	Pseudomonas aeruginosa	[u'NONRIBOSOMAL_PEPTIDE']	[u'NRPS']	11	[u'N METHYL L ISOLEUCYL L AMICLEONOMYCINYL L GLUTAMINE', u'L MEILE L ACM L GLN']	0.607451	O=C([C@H]([C@@H](C)CC)NC)N[C@@H](CCC1C=CC(N)C=C1)C(NC(CCC(N)=O)C(O)=O)=O
CCOB01	RESPIRATORY	Pseudomonas aeruginosa	[u'NONRIBOSOMAL_PEPTIDE']	[u'NRPS']	12	[u'MICACOCIDIN-P6']	0.765614	OC1=C(C2=NC(C3SCC(C(O)C(C)(C)C4=NC(C(O)=O)(C)CS4)N3C)CS2)C(CCCCCl)=CC=C1
LRZH01	RESPIRATORY	Pseudomonas aeruginosa	[u'NONRIBOSOMAL_PEPTIDE']	[u'NRPS']	2	[u'N-1409-A', u'PLUMBEMYCIN-A', u'ALANYLASPARTYL-{2-AMINO-5-PHOSPHORYL-3-PENTENOIC ACID}', u'N-1409-A']	0.999802	O=P(O)(C/C=C\[C@H](C(O)=O)NC([C@H](CC(O)=O)NC([C@H](C)N)=O)=O)O
LRZH01	RESPIRATORY	Pseudomonas aeruginosa	[u'NONRIBOSOMAL_PEPTIDE']	[u'NRPS']	4	[u'MICACOCIDIN-P6']	0.86702	OC1=C(C2=NC(C3SCC(C(O)C(C)(C)C4=NC(C(O)=O)(C)CS4)N3C)CS2)C(CCCCCl)=CC=C1
LTXL01	STOOL	Pseudomonas sp. HMSC066A08	[u'NONRIBOSOMAL_PEPTIDE']	[u'NRPS']	11	[u'LL-BM-123a', u'BM-123a', u'CINODINE-A"', u'BM-123-A"', u'LL-BM-123-A1', u'LL-BM-123-A"']	0.524775	N=C(N)NCCC[C@@](N)([H])C(N[C@H]([C@H]1O)[C@H](O[C@H](CO)[C@H]1O)O[C@@H]2[C@@H](CO)O[C@@H]([C@@H](O)[C@H]2O)O[C@@H]([C@H](O)[C@H](NC(C(CC3)NC3=N)=O)[C@@H]4O)[C@@H](OC(N)=O)[C@@H]4O)=O
LTXL01	STOOL	Pseudomonas sp. HMSC066A08	[u'NONRIBOSOMAL_PEPTIDE']	[u'NRPS']	12	[u'CYCLO-[GLY-L-SER-L-PRO-L-DLU]']	0.575472	OCC1NC(=O)CNC(=O)C(CCC(O)=O)NC(=O)C2CCCN2C1=O
MAZI01	RESPIRATORY	Pseudomonas aeruginosa	[u'NONRIBOSOMAL_PEPTIDE']	[u'NRPS']	3	[u'CYCLO-[GLY-L-SER-L-PRO-L-DLU]']	0.575472	OCC1NC(=O)CNC(=O)C(CCC(O)=O)NC(=O)C2CCCN2C1=O
MAZI01	RESPIRATORY	Pseudomonas aeruginosa	[u'NONRIBOSOMAL_PEPTIDE']	[u'NRPS']	8	[u'N-1409-A', u'PLUMBEMYCIN-A', u'ALANYLASPARTYL-{2-AMINO-5-PHOSPHORYL-3-PENTENOIC ACID}', u'N-1409-A']	0.999802	O=P(O)(C/C=C\[C@H](C(O)=O)NC([C@H](CC(O)=O)NC([C@H](C)N)=O)=O)O
CCOW01	RESPIRATORY	Pseudomonas aeruginosa	[u'NONRIBOSOMAL_PEPTIDE']	[u'NRPS']	6	[u'CYCLO-[GLY-L-SER-L-PRO-L-DLU]']	0.575472	OCC1NC(=O)CNC(=O)C(CCC(O)=O)NC(=O)C2CCCN2C1=O
CCOW01	RESPIRATORY	Pseudomonas aeruginosa	[u'NONRIBOSOMAL_PEPTIDE']	[u'NRPS']	7	[u'SF-2052-A', u'Formimidoylfortimicin A', u'DACTIMICIN', u'SF-2052', u'SF-2098', u'SF-2127', u'Epidactimicin', u'Antibiotic SF 2052']	0.960784	N=CNCC(N(C)[C@H]([C@@H](OC)[C@@H](O)[C@@H]1N)[C@@H](O)[C@@H]1O[C@H]([C@H](N)CC2)O[C@@H]2[C@@](C)([H])N)=O
CCOW01	RESPIRATORY	Pseudomonas aeruginosa	[u'NONRIBOSOMAL_PEPTIDE']	[u'NRPS']	8	[u'N-1409-A', u'PLUMBEMYCIN-A', u'ALANYLASPARTYL-{2-AMINO-5-PHOSPHORYL-3-PENTENOIC ACID}', u'N-1409-A']	0.999802	O=P(O)(C/C=C\[C@H](C(O)=O)NC([C@H](CC(O)=O)NC([C@H](C)N)=O)=O)O
CCOW01	RESPIRATORY	Pseudomonas aeruginosa	[u'NONRIBOSOMAL_PEPTIDE']	[u'NRPS']	9	[u'MICACOCIDIN-P6']	0.765614	OC1=C(C2=NC(C3SCC(C(O)C(C)(C)C4=NC(C(O)=O)(C)CS4)N3C)CS2)C(CCCCCl)=CC=C1
CCOW01	RESPIRATORY	Pseudomonas aeruginosa	[u'NONRIBOSOMAL_PEPTIDE']	[u'NRPS']	11	[u'N METHYL L ISOLEUCYL L AMICLEONOMYCINYL L GLUTAMINE', u'L MEILE L ACM L GLN']	0.607451	O=C([C@H]([C@@H](C)CC)NC)N[C@@H](CCC1C=CC(N)C=C1)C(NC(CCC(N)=O)C(O)=O)=O
LEGT01	RESPIRATORY	Pseudomonas aeruginosa	[u'NONRIBOSOMAL_PEPTIDE']	[u'NRPS']	4	[u'N-1409-A', u'PLUMBEMYCIN-A', u'ALANYLASPARTYL-{2-AMINO-5-PHOSPHORYL-3-PENTENOIC ACID}', u'N-1409-A']	0.999802	O=P(O)(C/C=C\[C@H](C(O)=O)NC([C@H](CC(O)=O)NC([C@H](C)N)=O)=O)O
LEGT01	RESPIRATORY	Pseudomonas aeruginosa	[u'NONRIBOSOMAL_PEPTIDE']	[u'NRPS']	7	[u'CYCLO-[GLY-L-SER-L-PRO-L-DLU]']	0.575472	OCC1NC(=O)CNC(=O)C(CCC(O)=O)NC(=O)C2CCCN2C1=O
LEGT01	RESPIRATORY	Pseudomonas aeruginosa	[u'NONRIBOSOMAL_PEPTIDE']	[u'NRPS']	8	[u'Belactosin C']	0.752716	O=C1O[C@@H](C(NCCC[C@@H](C(O)=O)NC([C@H](C)N)=O)=O)[C@@H]1[C@@H](C)CC
LEGT01	RESPIRATORY	Pseudomonas aeruginosa	[u'NONRIBOSOMAL_PEPTIDE']	[u'NRPS']	9	[u'MICACOCIDIN-P6']	0.765614	OC1=C(C2=NC(C3SCC(C(O)C(C)(C)C4=NC(C(O)=O)(C)CS4)N3C)CS2)C(CCCCCl)=CC=C1
LBNO01	RESPIRATORY	Mycobacterium elephantis	[u'NONRIBOSOMAL_PEPTIDE']	[u'NRPS']	15	[u'Belactosin B']	0.607255	O=C([C@H](O)[C@H]([C@@H](C)CC)C(OC)=O)N[C@@H](C1)[C@H]1C[C@@H](C(O)=O)NC([C@H](C)N)=O
LEGK01	RESPIRATORY	Pseudomonas aeruginosa	[u'NONRIBOSOMAL_PEPTIDE']	[u'NRPS']	6	[u'CYCLO-[GLY-L-SER-L-PRO-L-DLU]']	0.575472	OCC1NC(=O)CNC(=O)C(CCC(O)=O)NC(=O)C2CCCN2C1=O
LEGK01	RESPIRATORY	Pseudomonas aeruginosa	[u'NONRIBOSOMAL_PEPTIDE']	[u'NRPS']	8	[u'MICACOCIDIN-P6']	0.765614	OC1=C(C2=NC(C3SCC(C(O)C(C)(C)C4=NC(C(O)=O)(C)CS4)N3C)CS2)C(CCCCCl)=CC=C1
LEFB01	RESPIRATORY	Pseudomonas aeruginosa	[u'NONRIBOSOMAL_PEPTIDE']	[u'NRPS']	6	[u'MICACOCIDIN-P6']	0.765614	OC1=C(C2=NC(C3SCC(C(O)C(C)(C)C4=NC(C(O)=O)(C)CS4)N3C)CS2)C(CCCCCl)=CC=C1
LEFB01	RESPIRATORY	Pseudomonas aeruginosa	[u'NONRIBOSOMAL_PEPTIDE']	[u'NRPS']	7	[u'CYCLO-[GLY-L-SER-L-PRO-L-DLU]']	0.575472	OCC1NC(=O)CNC(=O)C(CCC(O)=O)NC(=O)C2CCCN2C1=O
LEFB01	RESPIRATORY	Pseudomonas aeruginosa	[u'NONRIBOSOMAL_PEPTIDE']	[u'NRPS']	8	[u'N-1409-A', u'PLUMBEMYCIN-A', u'ALANYLASPARTYL-{2-AMINO-5-PHOSPHORYL-3-PENTENOIC ACID}', u'N-1409-A']	0.607451	O=P(O)(C/C=C\[C@H](C(O)=O)NC([C@H](CC(O)=O)NC([C@H](C)N)=O)=O)O
LEFB01	RESPIRATORY	Pseudomonas aeruginosa	[u'NONRIBOSOMAL_PEPTIDE']	[u'NRPS']	9	[u'Verticilide A1', u'VERTICILIDE-A1', u'FKI-1033', u'VERTICILIDE', u'VERTICILIDE-A2']	0.999412	CCCCCC1OC(=O)C(C)N(C)C(=O)C(CCCCC)OC(=O)C(C)N(C)C(=O)C(CCCCC)OC(=O)C(C)N(C)C(=O)C(CCCCC)OC(=O)C(C)N(C)C1=O
LEIZ01	RESPIRATORY	Pseudomonas aeruginosa	[u'NONRIBOSOMAL_PEPTIDE']	[u'NRPS']	2	[u'CYCLO-[GLY-L-SER-L-PRO-L-DLU]']	0.575472	OCC1NC(=O)CNC(=O)C(CCC(O)=O)NC(=O)C2CCCN2C1=O
LEIZ01	RESPIRATORY	Pseudomonas aeruginosa	[u'NONRIBOSOMAL_PEPTIDE']	[u'NRPS']	5	[u'LL-BM-123a', u'BM-123a', u'CINODINE-A"', u'BM-123-A"', u'LL-BM-123-A1', u'LL-BM-123-A"']	0.524775	N=C(N)NCCC[C@@](N)([H])C(N[C@H]([C@H]1O)[C@H](O[C@H](CO)[C@H]1O)O[C@@H]2[C@@H](CO)O[C@@H]([C@@H](O)[C@H]2O)O[C@@H]([C@H](O)[C@H](NC(C(CC3)NC3=N)=O)[C@@H]4O)[C@@H](OC(N)=O)[C@@H]4O)=O
LEIZ01	RESPIRATORY	Pseudomonas aeruginosa	[u'NONRIBOSOMAL_PEPTIDE']	[u'NRPS']	7	[u'B-3454']	0.751553	O=C(NC(CO)C(NC(CCCNC(C)=O)C(NCCCCN)=O)=O)C(C(O)C(O)=O)NC(C(CCCNC(C)=O)N)=O
LEIZ01	RESPIRATORY	Pseudomonas aeruginosa	[u'NONRIBOSOMAL_PEPTIDE']	[u'NRPS']	8	[u'MICACOCIDIN-P6']	0.765614	OC1=C(C2=NC(C3SCC(C(O)C(C)(C)C4=NC(C(O)=O)(C)CS4)N3C)CS2)C(CCCCCl)=CC=C1
LEIZ01	RESPIRATORY	Pseudomonas aeruginosa	[u'NONRIBOSOMAL_PEPTIDE']	[u'NRPS']	9	[u'FLUVIBACTIN']	1	O=C(N(CCCNC(C1=C(O)C(O)=CC=C1)=O)CCCNC(C2=C(O)C(O)=CC=C2)=O)[C@H]3N=C(O[C@@H]3C)C4=C(O)C(O)=CC=C4
LEIZ01	RESPIRATORY	Pseudomonas aeruginosa	[u'NONRIBOSOMAL_PEPTIDE']	[u'NRPS']	10	[u'Belactosin C']	0.752716	O=C1O[C@@H](C(NCCC[C@@H](C(O)=O)NC([C@H](C)N)=O)=O)[C@@H]1[C@@H](C)CC
LELF01	ORAL	Paenibacillus sp. VT-400	[u'NONRIBOSOMAL_PEPTIDE']	[u'NRPS']	2	[u'POLYMYXIN-B1', u'POLYMYXIN-I1', u'[ILEU]-POLYMYXIN-B1']	0.778107	O=C(NC(CCN)C(NC1C(NC(CCN)C(NC(CC2=CC=CC=C2)C(NC(CC(C)C)C(NC(CCN)C(NC(CCN)C(NC(C(C)O)C(NCC1)=O)=O)=O)=O)=O)=O)=O)=O)C(C(C)O)NC(C(CCN)NC(CCCC[C@@H](C)CC)=O)=O
[truncated: 1,557 more rows]
